# Supplementary material for: From citronellal to iridoids: asymmetric synthesis of iridoids and their analogues via organocatalytic intramolecular Michael reactions
Source: Royal Society of Chemistry journal article supplement (doi:10.1039/d3ob00439b), 2023-01-01
Supplement: d3ob00439b1.pdf [file d3ob00439b1.pdf]

# Supporting Information

## From Citronellal to Iridoids. Asymmetric Syntheses of Iridoids and Their Analogs Via Organocatalytic Intramolecular Michael Reactions.

Raviramanujayya Tammiseti,<sup>a</sup> Prakash D. Chaudhari,<sup>a</sup> Bor-Cherng Hong,<sup>\*,a</sup> and Su-Ying Chien<sup>b</sup>

<sup>a</sup> Department of Chemistry and Biochemistry, National Chung Cheng University, Chiayi, 621, Taiwan.

<sup>b</sup> Instrumentation Center, National Taiwan University, Taipei, 106, Taiwan.

### SUPPORTING INFORMATION:

Contents:

- (1) Experimental procedures and characterization data for compounds.....Page S1–S29
- (2) Spectra for compounds.....Page S30–S165
- (3) HPLC analysis for compounds.....Page S166–S168

### General Procedure.

All solvents were reagent grade. Reactions were normally carried out under a nitrogen atmosphere in glassware or vial. Merck silica gel 60 (particle size 0.04-0.063 mm) was employed for flash chromatography. <sup>1</sup>H NMR spectra were obtained in CDCl<sub>3</sub> unless otherwise noted at 400 MHz (Bruker DPX-400, Bruker Ascend<sup>TM</sup> 400) or 500 MHz (Varian-Unity INOVA-500). <sup>13</sup>C NMR spectra were obtained at 125 MHz or 100 MHz. *E.e.* values were measured by HPLC on a chiral column (CHIRALPAK IA, 0.46 cm x 15 cm, 5 μm) by elution with 1% <sup>i</sup>PrOH-hexane. The flow rate of the indicated elution solvent is maintained at 1.0 mL/min, and the retention time of a compound is recorded accordingly. HPLC was equipped with ultraviolet detectors. The melting point was recorded on a melting point apparatus (MPA100–Automated melting point system, Stanford Research Systems, Inc.) and is uncorrected. IR spectra were recorded on Bruker Alpha FT-IR spectrometer. The optical rotation values were recorded with a Jasco-P-2000 digital polarimeter. ESI ionization time-of-flight mass (ESI-TOF HRMS) spectral data were collected on a JMS-T100LP 4G(JEOL) mass spectrometer equipped with the ESI source, detecting positive and negative ions. Typical measurement conditions are as follows: needle voltage: 2000 kV, orifice 1 voltage: 30 V, ring lens voltage: 10 V, spray temperature: 250 °C. EI-TOF mass spectral data were collected on a JMS-T200GC AccuTOF GCx-plus (JEOL) mass spectrometer. EI ionization time-of-flight mass (EI-TOF HRMS) spectral data were collected on a JMS-T200GC AccuTOF GCx-plus (JEOL) mass spectrometer equipped with the EI ion source and DIP sampling device. Typical measurement conditions are as follows: ionizing voltage: 70 eV, ionizing current: 300 μA, ion chamber temperature: 250 °C, DIP temperature: 50 to 200 °C in 2 minutes. The single-crystal

X-ray diffraction data of crystals were individually collected in-house on a Bruker D8 Venture diffractometer equipped with a Cu-target ( $K\alpha = 1.54178 \text{ \AA}$ ) or Mo-target ( $K\alpha = 0.71073 \text{ \AA}$ ) microfocus X-ray generators and a PHOTON-II CMOS detector. The temperature was adjusted with a nitrogen flow (Oxford Cryosystems). After collection, the data were integrated with the Bruker SAINT software package using a narrow-frame algorithm and were corrected for absorption effects using the Multi-Scan method (SADABS). Then, the molecular structure was solved and refined by the Bruker SHELXTL Software Package and the final anisotropic full-matrix least-squares method was used to refine on F2 with variables parameters to determine crystal structure.

### Preparation of aldehyde ester **1**:

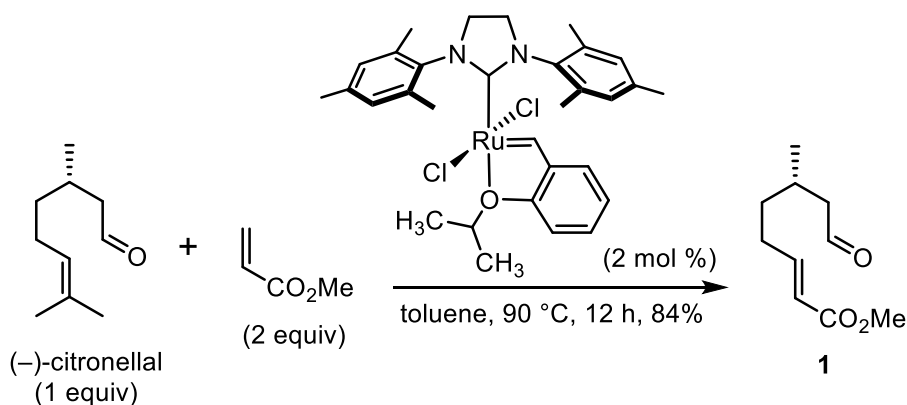

To a solution of (-)-citronellal (500 mg, 3.24 mmol) and methyl acrylate (558 mg, 6.48 mmol, 2.0 equiv) in toluene (10 mL), placed in a dry 20-mL sealed tube, was added Hoveyda-Grubbs Catalyst® M720 (Umicore, CAS no. 301224-40-8, 40.6 mg, 0.06 mmol, 2 mol%) at room temperature under nitrogen. The resulting solution was stirred at 90 °C for 12 h until the completion of the reaction, as monitored by TLC. The reaction solution was concentrated *in vacuo* to give the crude residue. The *E*-isomer was found to be predominated, as determined by  $^1\text{H}$  NMR analysis of the crude product. The crude product was purified by flash column chromatography with 5% EtOAc-hexane ( $R_f = 0.45$  in 20% EtOAc-hexane) to afford product **1** (503 mg, 84% yield) as a colorless oil.<sup>1</sup> Chiral HPLC analysis for **1**: Chiralpak IA (elute: 1% *i*PrOH-hexane), flow rate 1.0 mL/min, detector 225 nm,  $t_1 = 14.9$  min,  $t_2 = 19.2$  min, 98.4:1.6 er.

Selected data for **1**:  $[\alpha]_D^{26} -32.8$  (c 1,  $\text{CHCl}_3$ ); IR (neat): 2923, 2854, 1705, 1462, 1166, 915, 732  $\text{cm}^{-1}$ ;  $^1\text{H}$  NMR ( $\text{CDCl}_3$ , 500 MHz):  $\delta$  9.73 (s, 1 H), 6.96 – 6.88 (m, 1 H), 5.81 (d,  $J = 15.6$  Hz, 1 H), 3.70 (s, 3 H), 2.39 (dd,  $J = 16.4, 5.6$  Hz, 1 H), 2.29 – 2.14 (m, 3 H), 2.11 – 2.02

<sup>1</sup> (a) Bilel, H.; Hamdi, N.; Zagrouba, F.; Fischmeister, C.; Bruneau, C. *Green Chem.* **2011**, *13*, 1448 – 1452. (b) Yoshikai, K.; Hayama, T.; Nishimura, K.; Yamada, K.-I.; Tomioka, K. *J. Org. Chem.* **2005**, *70*, 681 – 683.

(m, 1 H), 1.53 – 1.44 (m, 1 H), 1.41 – 1.31 (m, 1 H), 0.96 (d,  $J = 6.7$  Hz, 3 H);  $^{13}\text{C}$  NMR ( $\text{CDCl}_3$ , 125 MHz):  $\delta$  202.3 (CH), 167.0 (C), 148.8 (CH), 121.2 (CH), 51.4 ( $\text{CH}_3$ ), 50.8 ( $\text{CH}_2$ ), 34.9 ( $\text{CH}_2$ ), 29.6 ( $\text{CH}_2$ ), 27.5 (CH), 19.6 ( $\text{CH}_3$ ); HRMS (GC-EI-TOF)  $m/z$ :  $[\text{M}]^+$  Calcd for  $\text{C}_{10}\text{H}_{16}\text{O}_3$  184.1099; found: 184.1092.

### Preparation of aldehyde 2:

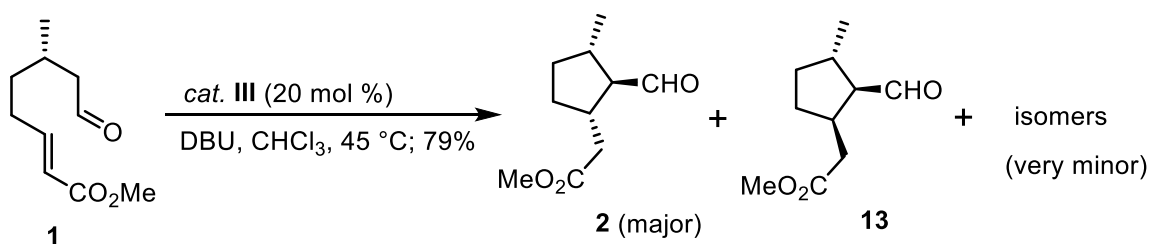

To a solution of catalyst **III** (176.7 mg, 0.54 mmol, 0.2 equiv) and **1** (500 mg, 2.71 mmol) in  $\text{CHCl}_3$  (9 mL) was added DBU (82.6 mg, 0.54 mmol, 0.2 equiv) at ambient temperature. The resulting solution was stirred at 45 °C for 48 h until the completion of the reaction, as monitored by TLC. The reaction solution was diluted with EtOAc, and washed with water and brine. The combined organic solution was dried over  $\text{Na}_2\text{SO}_4$  and concentrated *in vacuo* to give a crude oil. The dr ratio, as determined by  $^1\text{H}$  NMR analysis of the crude mixture, was found to be 83:17. The crude product was purified by flash column chromatography with 5% EtOAc-hexane ( $R_f = 0.51$  in 20% EtOAc-hexane) to afford products **2** and **13** (396.7 mg, 79% yield) as a colorless oil. Purification of the mixture using prolonged flash column chromatography resulted in the isolation of pure samples of **2** (351 mg; 70%;  $R_f = 0.51$  in 20% EtOAc-hexane) and **13** (7.3 mg;  $R_f = 0.52$  in 20% EtOAc-hexane) for analysis.

Selected data for **2**:  $[\alpha]_{\text{D}}^{26} -10.3$  ( $c$  1,  $\text{CHCl}_3$ ); IR (neat): 3483, 2959, 2874, 1724, 1457, 1381, 1285, 1208, 1167  $\text{cm}^{-1}$ ;  $^1\text{H}$  NMR ( $\text{CDCl}_3$ , 500 MHz):  $\delta$  9.55 (d,  $J = 3.9$  Hz, 1 H), 3.63 (s, 3 H), 2.67 – 2.56 (m, 1 H), 2.38 (d,  $J = 7.4$  Hz, 2 H), 2.26 – 2.13 (m, 1 H), 2.01 – 1.84 (m, 3 H), 1.47 – 1.39 (m, 1 H), 1.38 – 1.29 (m, 1 H), 1.04 (d,  $J = 6.7$  Hz, 3 H);  $^{13}\text{C}$  NMR ( $\text{CDCl}_3$ , 125 MHz):  $\delta$  203.3 (CH), 172.8 (C), 65.8 (CH), 51.6 ( $\text{CH}_3$ ), 39.3 ( $\text{CH}_2$ ), 37.6 (CH), 36.8 (CH), 33.3 ( $\text{CH}_2$ ), 31.3 ( $\text{CH}_2$ ), 19.5 ( $\text{CH}_3$ ); HRMS (GC-EI-TOF)  $m/z$ :  $[\text{M}]^+$  Calcd for  $\text{C}_{10}\text{H}_{16}\text{O}_3$  184.1099; found: 184.1090.

Selected data for **13**:  $[\alpha]_{\text{D}}^{20} -7.9$  ( $c$  1,  $\text{CHCl}_3$ );  $^1\text{H}$  NMR ( $\text{CDCl}_3$ , 500 MHz):  $\delta$  9.73 (d,  $J = 3.0$  Hz, 1 H), 3.64 (s, 3 H), 2.79 – 2.70 (m, 1 H), 2.53 – 2.46 (m, 2 H), 2.41 – 2.31 (m, 2 H), 2.01 – 1.89 (m, 2 H), 1.42 – 1.32 (m, 1 H), 1.28 – 1.18 (m, 1 H), 1.03 (d,  $J = 6.8$  Hz, 3 H);  $^{13}\text{C}$  NMR ( $\text{CDCl}_3$ , 125 MHz):  $\delta$  204.2 (CH), 173.1 (C), 61.2 (CH), 51.6 ( $\text{CH}_3$ ), 38.3 (CH), 35.7 ( $\text{CH}_2$ ), 34.5 (CH), 33.4 ( $\text{CH}_2$ ), 32.4 ( $\text{CH}_2$ ), 20.4 ( $\text{CH}_3$ ).

### Preparation of 4:

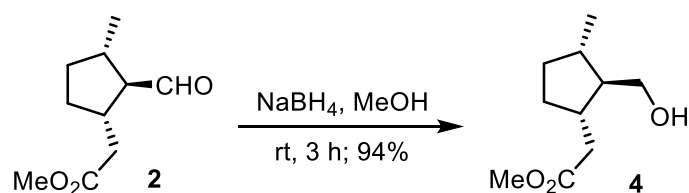

To a solution of **2** (200 mg, 1.09 mmol) in MeOH (10 mL) was added NaBH<sub>4</sub> (82.1 mg, 2.17 mmol, 2.0 equiv) at ambient temperature. The resulting solution was stirred at room temperature for 3 h until the completion of the reaction, as monitored by TLC. The reaction was quenched by the addition of an aqueous solution of 2N HCl (0.5 mL). The reaction mixture was diluted with EtOAc, and washed with water and brine. The combined organic solution was dried over Na<sub>2</sub>SO<sub>4</sub> and concentrated *in vacuo* to give a crude oil. The crude product was purified by flash column chromatography with 0 to 30 % EtOAc-hexane (*R<sub>f</sub>* = 0.47 in 40 % EtOAc-hexane) to afford product **4** (191 mg, 94% yield) as a colorless oil.<sup>2</sup>

Selected data for **4**: [α]<sub>D</sub><sup>27</sup> 13.7 (*c* 1, CHCl<sub>3</sub>); IR (neat): 3429, 2949, 2869, 1734, 1440, 1161, 1018, 874 cm<sup>-1</sup>; <sup>1</sup>H NMR (CDCl<sub>3</sub>, 500 MHz): δ 3.65 (s, 3 H), 3.61 (dd, *J* = 11.0, 4.5 Hz, 1 H), 3.52 (dd, *J* = 11.0, 6.5 Hz, 1 H), 2.45 (dd, *J* = 15.9, 7.7 Hz, 1 H), 2.33 (dd, *J* = 15.9, 6.7 Hz, 1 H), 2.22 – 2.11 (m, 1 H), 1.85 – 1.64 (m, 4 H), 1.40 – 1.29 (m, 1 H), 1.29 – 1.12 (m, 2 H), 0.99 (d, *J* = 6.6 Hz, 3 H); <sup>13</sup>C NMR (CDCl<sub>3</sub>, 125 MHz): δ 174.5 (C), 64.4 (CH<sub>2</sub>), 55.8 (CH), 51.6 (CH<sub>3</sub>), 40.0 (CH<sub>2</sub>), 38.6 (CH), 37.0 (CH), 32.9 (CH<sub>2</sub>), 31.2 (CH<sub>2</sub>), 20.1 (CH<sub>3</sub>); HRMS (HPLC-ESI-TOF) *m/z*: [M+Na]<sup>+</sup> Calcd for C<sub>10</sub>H<sub>18</sub>NaO<sub>3</sub>: 209.1154; found: 209.1153.

### Preparation of 4:

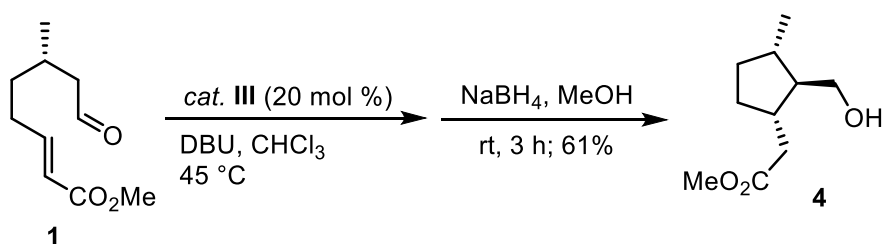

To a solution of catalyst **III** (17.7 mg, 0.05 mmol, 0.2 equiv) and DBU (8.3 mg, 0.05 mmol, 0.2 equiv) in CHCl<sub>3</sub> (1 mL) was added a solution of **1** (50 mg 0.27 mmol) in CHCl<sub>3</sub> (1.1 mL) at ambient temperature. The resulting solution was stirred at 45 °C for 48 h until the completion of the reaction, as monitored by TLC. The reaction solution was diluted with EtOAc (15 mL), and washed with water (7 mL) and brine (7 mL). The combined organic

<sup>2</sup> Bonini, C.; Fabio, R. D. *J. Org. Chem.* **1982**, *47*, 1343 – 1345.



solution was dried over  $\text{Na}_2\text{SO}_4$  and concentrated *in vacuo* to give a crude oil. The crude product was directly used for the next step reaction without further purification.

To a solution of the above crude product in MeOH (1 mL) was added  $\text{NaBH}_4$  (20.5 mg, 0.54 mmol, 2 equiv) at ambient temperature. The resulting solution was stirred at room temperature for 3 h until the completion of the reaction, as monitored by TLC. The reaction was quenched by the addition of water (0.5 mL). The reaction mixture was diluted with EtOAc (15 mL), and washed with water (5 mL) and brine (5 mL). The combined organic solution was dried over  $\text{Na}_2\text{SO}_4$  and concentrated *in vacuo* to give a crude oil. The crude product was purified by flash column chromatography with 10 % EtOAc-hexane ( $R_f = 0.45$  for **4** in 15 % EtOAc-hexane, after developing twice) to afford products **4** (31 mg, 61 %) as a colorless oil.

### Preparation of **3**:

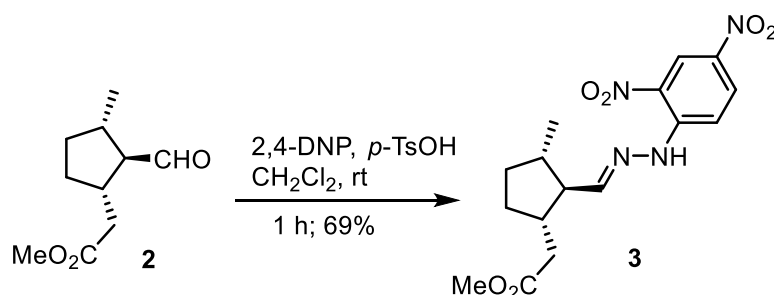

To a solution of **2** (90.0 mg, 0.49 mmol) in  $\text{CH}_2\text{Cl}_2$  (6 mL) was added 2,4-dinitrophenylhydrazine (96.8 mg, 0.45 mmol, 1.08 equiv) and *p*-TsOH (4.6 mg, 0.03 mmol, 0.05 equiv) at room temperature. The resulting solution was stirred at room temperature for 1 h until the completion of the reaction, as monitored by TLC. The reaction mixture was diluted with EtOAc, and the solution was washed with saturated aqueous  $\text{NaHCO}_3$  solution, followed by brine. The organic solution was dried over  $\text{Na}_2\text{SO}_4$  and concentrated *in vacuo* to give a crude oil. The crude product was purified by flash column chromatography with 10 % EtOAc-hexane ( $R_f = 0.48$  in 30% EtOAc-hexane) to afford product **3** (123 mg, 69% yield) as yellow color solids.

Selected data for **3**: mp. 106-107 °C;  $[\alpha]_D^{26}$  10.2 (*c* 1,  $\text{CHCl}_3$ ); IR (KBr): 3293, 2949, 2867, 1738, 1617, 1511, 1428, 1337, 1310, 1266, 1138, 1071, 739, 605  $\text{cm}^{-1}$ ;  $^1\text{H}$  NMR (400 MHz,  $\text{CDCl}_3$ ):  $\delta$  11.01 (s, 1 H), 9.10 (d,  $J = 2.6$  Hz, 1 H), 8.28 (dd,  $J = 9.6, 2.5$  Hz, 1 H), 7.90 (d,  $J = 9.6$  Hz, 1 H), 7.38 (d,  $J = 6.2$  Hz, 1 H), 3.59 (s, 3 H), 2.53 – 2.27 (m, 3 H), 2.09 – 1.90 (m, 4 H), 1.51 – 1.30 (m, 2 H), 1.04 (d,  $J = 5.9$  Hz, 3 H);  $^{13}\text{C}$  NMR (100 MHz,  $\text{CDCl}_3$ ):  $\delta$  173.0 (C), 154.3 (CH), 145.0 (C), 137.9 (C), 130.0 (CH), 128.9 (C), 123.5 (CH), 116.5 (CH), 56.9 (CH), 51.6 ( $\text{CH}_3$ ), 40.7 (CH), 39.6 (CH), 38.9 ( $\text{CH}_2$ ), 32.8 ( $\text{CH}_2$ ), 30.8 ( $\text{CH}_2$ ), 19.0 ( $\text{CH}_3$ ); HRMS (GC-EI-TOF)  $m/z$ :  $[\text{M}]^+$  Calcd for  $\text{C}_{16}\text{H}_{20}\text{N}_4\text{O}_6$  364.1383; found: 364.1389.

### Recrystallization of **3** was performed as follows:

Compound **3** (~3 mg) in a screw cap vial (4 mL vial) was dissolved in  $\text{CHCl}_3$  (~0.5 mL) and then diluted with *n*-hexane (~2.5 mL). The vial was covered with aluminum foil (with 4-5 holes in it) and placed in another vial (20 mL vial), which was filled with *n*-hexane (~8 mL). The 20-mL vial was closed gently with a screw cap and let stand for 4-5 days until the solvent in the inner vial has completely evaporated. The crystals formed were subjected to single-crystal X-ray analysis.

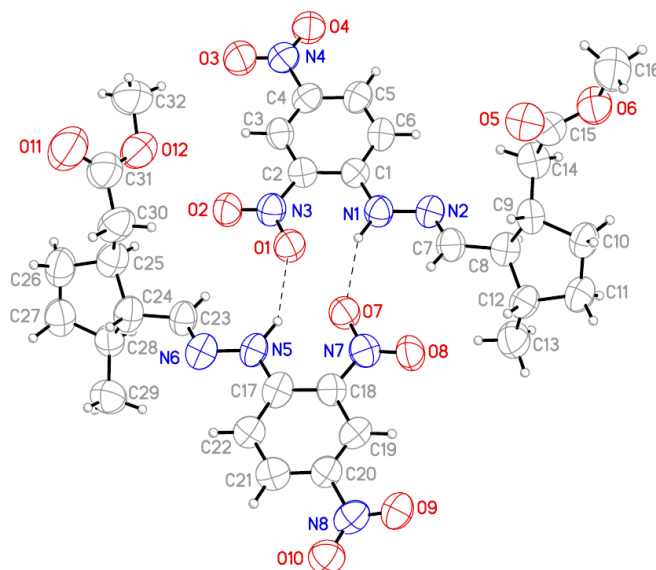

Thermal ellipsoids draw at the 50% probability level

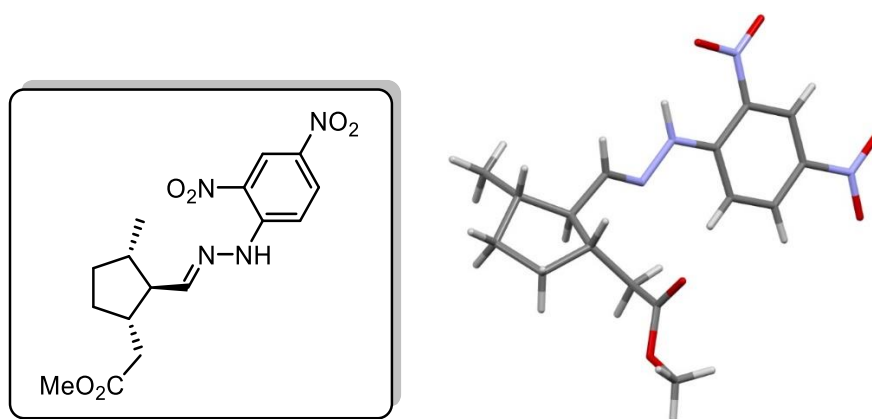

**Figure S1.** ORTEP and Stereo plots for X-ray crystal structures of **3** (**ic21707**).

CCDC 2235981 contains the supplementary crystallographic data for **3** (**ic21707**). These data can be obtained free of charge from the Cambridge Crystallographic Data Centre via [www.ccdc.cam.ac.uk](http://www.ccdc.cam.ac.uk)

Table S1. Crystal data and structure refinement for **3 (ic21707)**.

|                                   |                                                                |                  |
|-----------------------------------|----------------------------------------------------------------|------------------|
| Identification code               | ic21707                                                        |                  |
| Empirical formula                 | C <sub>32</sub> H <sub>40</sub> N <sub>8</sub> O <sub>12</sub> |                  |
| Formula weight                    | 728.72                                                         |                  |
| Temperature                       | 200(2) K                                                       |                  |
| Wavelength                        | 1.54178 Å                                                      |                  |
| Crystal system                    | Triclinic                                                      |                  |
| Space group                       | P1                                                             |                  |
| Unit cell dimensions              | a = 4.8265(7) Å                                                | α = 74.980(12)°. |
|                                   | b = 11.8034(18) Å                                              | β = 85.102(12)°. |
|                                   | c = 16.146(2) Å                                                | γ = 79.447(12)°. |
| Volume                            | 872.7(2) Å <sup>3</sup>                                        |                  |
| Z                                 | 1                                                              |                  |
| Density (calculated)              | 1.387 Mg/m <sup>3</sup>                                        |                  |
| Absorption coefficient            | 0.909 mm <sup>-1</sup>                                         |                  |
| F(000)                            | 384                                                            |                  |
| Crystal size                      | 0.600 x 0.163 x 0.159 mm <sup>3</sup>                          |                  |
| Theta range for data collection   | 3.933 to 67.980°.                                              |                  |
| Index ranges                      | -4 ≤ h ≤ 5, -14 ≤ k ≤ 14, -19 ≤ l ≤ 19                         |                  |
| Reflections collected             | 10899                                                          |                  |
| Independent reflections           | 5724 [R(int) = 0.1226]                                         |                  |
| Completeness to theta = 67.679°   | 99.4 %                                                         |                  |
| Absorption correction             | Semi-empirical from equivalents                                |                  |
| Max. and min. transmission        | 1.00000 and 0.41539                                            |                  |
| Refinement method                 | Full-matrix least-squares on F <sup>2</sup>                    |                  |
| Data / restraints / parameters    | 5724 / 16 / 482                                                |                  |
| Goodness-of-fit on F <sup>2</sup> | 1.376                                                          |                  |
| Final R indices [I > 2σ(I)]       | R1 = 0.1206, wR2 = 0.2821                                      |                  |
| R indices (all data)              | R1 = 0.1726, wR2 = 0.3346                                      |                  |
| Absolute structure parameter      | 0.3(9)                                                         |                  |
| Extinction coefficient            | 0.010(3)                                                       |                  |
| Largest diff. peak and hole       | 0.480 and -0.447 e.Å <sup>-3</sup>                             |                  |

### Preparation of 5:

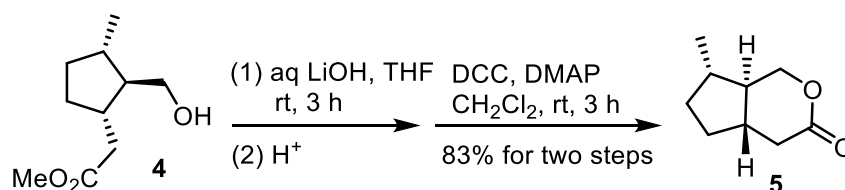

To a solution of **4** (100 mg, 0.54 mmol) in THF (3 mL) was added an aqueous solution of LiOH (19.4 mg, 0.81 mmol, 1.5 equiv) in water (1.5 mL) at room temperature. The resulting solution was stirred at room temperature for 3 h until the completion of the reaction, as monitored by TLC. The pH of the solution was adjusted to 2-3 by adding 3M aqueous HCl at 0 °C. The reaction mixture was diluted and extracted with EtOAc. The solution was washed with water and brine. The combined organic solution was dried over Na<sub>2</sub>SO<sub>4</sub> and concentrated *in vacuo* to give the crude product as an oil. This residue was proceeded to the next step without further purification.

To a solution of the above crude product in dry CH<sub>2</sub>Cl<sub>2</sub> (10 mL) was added DCC (111.4 mg, 0.54 mmol 1.0 equiv) and DMAP (13.2 mg, 0.11 mmol, 0.2 equiv) at room temperature. The resulting solution was stirred at room temperature for 3 h until the completion of the reaction, as monitored by TLC. The reaction mixture was diluted with EtOAc, followed by washing with brine and water. The combined organic solution was dried over Na<sub>2</sub>SO<sub>4</sub> and concentrated *in vacuo* to give a crude oil. The crude product was purified by flash column chromatography with 5 % EtOAc-hexane (*R<sub>f</sub>* = 0.46 in 30% EtOAc-hexane) to afford product **5** (69 mg, 83% yield) as a colorless oil.

Select data for **5**: [α]<sub>D</sub><sup>27</sup> 95 (*c* 1, CHCl<sub>3</sub>); IR (neat): 2953, 2871, 1732, 1404, 1310, 1195, 1132, 1018, 799, 700 cm<sup>-1</sup>; <sup>1</sup>H NMR (CDCl<sub>3</sub>, 500 MHz): δ 4.55 (dd, *J* = 10.5, 5.0 Hz, 1 H), 4.05 (dd, *J* = 11.7, 10.5 Hz, 1 H), 2.84 (dd, *J* = 17.7, 5.0 Hz, 1 H), 2.23 (dd, *J* = 17.7, 12.6 Hz, 1 H), 2.10 – 2.00 (m, 1 H), 1.94 – 1.78 (m, 2 H), 1.73 – 1.62 (m, 1 H), 1.46 – 1.21 (m, 3 H), 1.03 (d, *J* = 6.6 Hz, 3 H); <sup>13</sup>C NMR (CDCl<sub>3</sub>, 125 MHz): δ 170.5 (C), 74.3 (CH<sub>2</sub>), 48.6 (CH), 41.5 (CH), 38.1 (CH<sub>2</sub>), 36.0 (CH), 33.0 (CH<sub>2</sub>), 29.7 (CH<sub>2</sub>), 19.0 (CH<sub>3</sub>); HRMS (GC-EI-TOF) *m/z*: [M]<sup>+</sup> Calcd for C<sub>9</sub>H<sub>14</sub>O<sub>2</sub> 154.0994; found: 154.0991.

### Preparation of **6** with LDA:

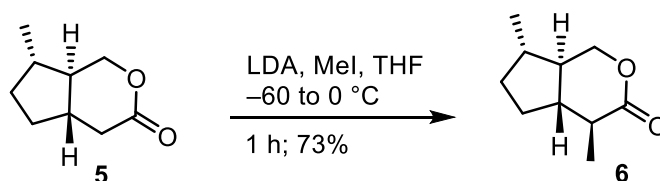

To a solution of **5** (20 mg, 0.13 mmol) in dry THF (3 mL) was added LDA (0.08 mL, 2 M in hexane, 1.5 equiv) at  $-60^\circ\text{C}$ . The resulting solution was stirred at  $-60^\circ\text{C}$  for 30 min, followed by the addition of iodomethane (10  $\mu\text{L}$ , 0.16 mmol, 1.2 equiv), and the solution was gradually warmed up to  $0^\circ\text{C}$  over 1 h. The reaction was quenched by the addition of an aqueous saturated solution of  $\text{NH}_4\text{Cl}$  (5 mL). The resulting solution was extracted with EtOAc (10 mL x 2), washed with brine (5 mL), and the combined organic solution was dried over  $\text{Na}_2\text{SO}_4$  and concentrated *in vacuo* to give a crude oil. The crude product was purified by flash column chromatography with 5 % EtOAc-hexane ( $R_f = 0.52$  in 30% in EtOAc-hexane) to afford product **6** (16 mg, 73%) as a colorless oil.

### Preparation of **6** and **7** with LiHMDS:

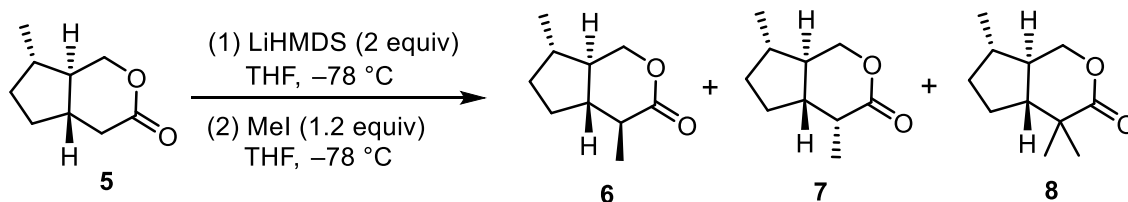

To a solution of **5** (40.0 mg, 0.26 mmol) in dry THF (3.2 mL) was added lithium bis(trimethylsilyl)amide (0.52 mL, 1.0 M in THF, 0.52 mmol, 2.0 equiv) at  $-78^\circ\text{C}$ . The resulting solution was stirred at  $-78^\circ\text{C}$  for 30 min, followed by the addition of iodomethane (20  $\mu\text{L}$ , 0.32 mmol, 1.2 equiv), and the solution was stirred at  $-78^\circ\text{C}$  for 30 min. The reaction was quenched by the addition of an aqueous saturated solution of  $\text{NH}_4\text{Cl}$  (20 mL), and the solution was gradually warmed up to room temperature. The resulting mixture was extracted with EtOAc, washed with brine, and the combined organic solution was dried over  $\text{MgSO}_4$  and concentrated *in vacuo* to give a crude oil. The crude product was purified by flash column chromatography with 0 to 10 % EtOAc-hexane to afford product **6** ( $R_f = 0.52$  in 30% in EtOAc-hexane, 19.5 mg, 45% yield) as a colorless oil, product **7** ( $R_f = 0.50$  in 30% in EtOAc-hexane, 11.6 mg, 27% yield) as a colorless oil, **8** ( $R_f = 0.54$  in 30% in EtOAc-hexane, 2.3 mg, 5% yield), and recovered **5** (3.5 mg, 9% yield).

Select data for **6**:  $[\alpha]_D^{27}$  36.9 (*c* 1, CHCl<sub>3</sub>);<sup>3</sup> IR (neat): 2954, 2872, 1731, 1459, 1312, 1174, 1133, 1010, 797 cm<sup>-1</sup>; <sup>1</sup>H NMR (CDCl<sub>3</sub>, 500 MHz):  $\delta$  4.52 (dd, *J* = 10.4, 5.1 Hz, 1 H), 4.03 (dd, *J* = 11.7, 10.4 Hz, 1 H), 2.25 (dq, *J* = 11.9, 7.0 Hz, 1H), 2.10 – 2.00 (m, 1 H), 1.98 – 1.89 (m, 1 H), 1.75 – 1.55 (m, 2 H), 1.51 – 1.35 (m, 2 H), 1.30 – 1.22 (m, 1 H), 1.25 (d, *J* = 7.0 Hz, 3 H), 1.01 (d, *J* = 6.6 Hz, 3 H); <sup>13</sup>C NMR (CDCl<sub>3</sub>, 125 MHz):  $\delta$  174.0 (C), 74.3 (CH<sub>2</sub>), 48.7 (CH), 48.3 (CH), 44.1 (CH), 36.7 (CH), 33.0 (CH<sub>2</sub>), 28.9 (CH<sub>2</sub>), 19.0 (CH<sub>3</sub>), 15.4 (CH<sub>3</sub>);<sup>4</sup> HRMS (HPLC-ESI-TOF) *m/z*: [M+H]<sup>+</sup> Calcd for C<sub>10</sub>H<sub>16</sub>NaO<sub>2</sub>: 191.1048; found: 191.1050.

Select data for **7**:  $[\alpha]_D^{23}$  113.9 (*c* 1, CHCl<sub>3</sub>); <sup>1</sup>H NMR (CDCl<sub>3</sub>, 500 MHz):  $\delta$  4.51 (dd, *J* = 10.5, 5.1 Hz, 1 H), 3.99 (dd, *J* = 11.4, 10.5 Hz, 1 H), 2.89 (qd, *J* = 7.6, 5.9 Hz, 1 H), 2.08 – 1.97 (m, 2 H), 1.70 – 1.46 (m, 4 H), 1.42 – 1.33 (m, 1 H), 1.22 (d, *J* = 7.6 Hz, 3 H), 1.03 (d, *J* = 6.5 Hz, 3 H); <sup>13</sup>C NMR (CDCl<sub>3</sub>, 125 MHz):  $\delta$  175.0 (C), 74.6 (CH<sub>2</sub>), 44.7 (CH), 42.2 (CH), 38.9 (CH), 36.4 (CH), 33.2 (CH<sub>2</sub>), 24.5 (CH<sub>2</sub>), 19.2 (CH<sub>3</sub>), 13.0 (CH<sub>3</sub>); HRMS (HPLC-ESI-TOF) *m/z*: [M+H]<sup>+</sup> Calcd for C<sub>10</sub>H<sub>16</sub>NaO<sub>2</sub>: 191.1048; found: 191.1044.

### Preparation of **8**:

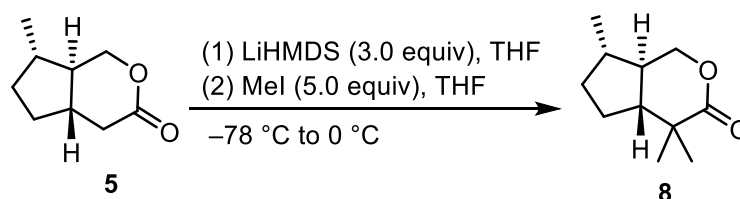

To a stirred solution of **5** (45.0 mg, 0.29 mmol) in anhydrous THF (3.6 mL) at -78 °C was added lithium bis(trimethylsilyl)amide (0.90 mL, 1.0 M in THF, 0.90 mmol, 3.1 equiv). The resulting solution was stirred at -78 °C for 30 min, followed by the addition of iodomethane (50  $\mu$ L, 1.46 mmol, 5.0 equiv), and the solution was stirred at -78 °C for 30 min, then slowly warmed to 0 °C over 1 h. Saturated aqueous NH<sub>4</sub>Cl (30 mL) was added to quench the reaction, and the solution was gradually warmed to room temperature. The resulting mixture was extracted with EtOAc and washed with brine, the combined organic solutions were dried over MgSO<sub>4</sub> and concentrated *in vacuo* to give a residue. The crude product was purified by flash column chromatography with 0 to 10 % EtOAc-hexane to afford product **8** (*R<sub>f</sub>* = 0.54 in 30% in EtOAc-hexane, 37.3 mg, 70% yield) as a white solid.

Select data for **8**: mp. 66-67 °C;  $[\alpha]_D^{22}$  -7.7 (*c* 1, CHCl<sub>3</sub>); IR (neat): 2957, 2870, 1727, 1464, 1378, 1232, 1130, 1010, 800, 650 cm<sup>-1</sup>; <sup>1</sup>H NMR (CDCl<sub>3</sub>, 500 MHz):  $\delta$  4.50 (dd, *J* = 10.5, 5.0 Hz, 1 H), 4.00 (dd, *J* = 11.0, 10.5 Hz, 1 H), 2.08 – 1.98 (m, 1 H), 1.86 – 1.77 (m, 1 H), 1.71 – 1.59 (m, 3 H), 1.51 – 1.41 (m, 1 H), 1.41 – 1.32 (m, 1 H), 1.26 (s, 3 H), 1.18 (s, 3

<sup>3</sup> Trave, R.; Garanti, Marchesini, A.; Garanti, L. *Gazz. Chim. Ital.* **1970**, *100*, 1061–1075.

<sup>4</sup> R. Hilgraf, N. Zimmermann, L. Lehmann, A. Tröger, W. Francke *Beilstein J. Org. Chem.* **2012**, *8*, 1256–1264.

H), 1.01 (d,  $J = 6.2$  Hz, 3 H);  $^{13}\text{C}$  NMR ( $\text{CDCl}_3$ , 125 MHz):  $\delta$  177.6 (C), 74.6 ( $\text{CH}_2$ ), 51.4 (CH), 43.7 (CH), 42.8 (C), 37.0 (CH), 33.1 ( $\text{CH}_2$ ), 26.1 ( $\text{CH}_3$ ), 23.1 ( $\text{CH}_2$ ), 21.1 ( $\text{CH}_3$ ), 19.1 ( $\text{CH}_3$ ); HRMS (HPLC-ESI-TOF)  $m/z$ :  $[\text{M}+\text{H}]^+$  Calcd for  $\text{C}_{11}\text{H}_{18}\text{NaO}_2$ : 205.1204; found: 205.1205.

### One Pot Organocatalytic asymmetric Michael-Pictet-Spengler-Lactamization Reaction.

#### Preparation of indoleamide **10a** and **11a**:

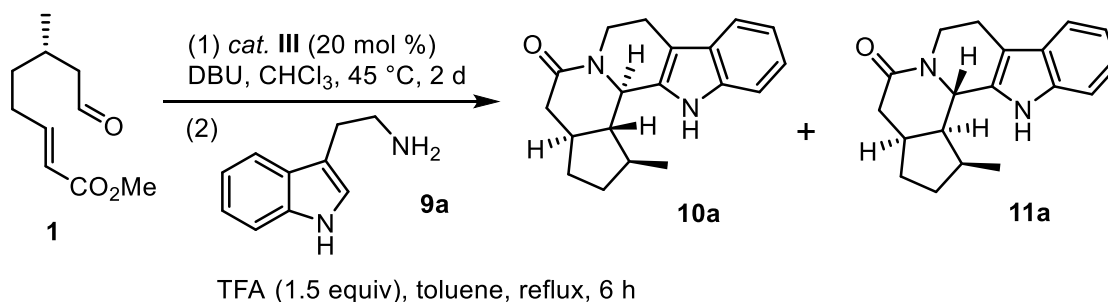

To a mixture of **1** (25 mg 0.14 mmol) and catalyst **III** (9 mg, 0.03 mmol, 0.2 equiv), and  $\text{CHCl}_3$  (0.5 mL) in a 25-mL pear-shaped flask was added DBU (4.2 mg, 0.03 mmol, 0.2 equiv) at ambient temperature. The resulting solution was stirred at 45 °C for 48 h until the completion of the reaction, as monitored by TLC. The reaction solution was concentrated *in vacuo* to give the residue, which was then employed directly in the subsequent process without further purification.

To a solution of the above crude product in toluene (14 mL) was added tryptamine (32.6 mg, 0.20 mmol, 1.5 equiv) and TFA (23.2 mg, 0.20 mmol, 1.5 equiv) at ambient temperature. The resulting solution was heated to reflux with the Dean-Stark trap for 6 h until the completion of the reaction, as monitored by TLC. The solution was neutralized by the addition of an aqueous  $\text{NaHCO}_3$  solution, monitored by pH paper. The mixture was extracted with EtOAc (20 mL x 2). The combined organic solution was washed with brine, dried over  $\text{Na}_2\text{SO}_4$ , and concentrated *in vacuo* to give a crude oil. The diastereomeric ratio, as determined by  $^1\text{H}$  NMR analysis of the crude mixture, was found to be 84:16. The crude product was purified by flash column chromatography with 0 to 35 % EtOAc-hexane as eluent ( $R_f = 0.41$  for **11a**,  $R_f = 0.40$  for **10a** in 70 % EtOAc-hexane) to afford products **10a** and **11a** (20.8 mg, 52 % yield). Purification of the mixture using prolonged flash column chromatography resulted in the isolation of pure samples **10a** and **11a** for analysis.

Selected data for **10a**: white solid, mp: 200-201 °C;  $[\alpha]_{\text{D}}^{26}$  109.4 ( $c$  1,  $\text{CHCl}_3$ ); IR (neat): IR (neat): 3352, 2946, 2867, 1625, 1409, 1351, 1307, 742  $\text{cm}^{-1}$ ;  $^1\text{H}$  NMR ( $\text{CDCl}_3$ , 500 MHz):  $\delta$  7.83 (brs, 1 H), 7.49 (d,  $J = 7.8$  Hz, 1 H), 7.32 (d,  $J = 8.1$  Hz, 1 H), 7.19 – 7.15 (m, 1 H), 7.12 – 7.09 (m, 1 H), 5.09 (ddd,  $J = 12.0, 4.4, 1.2$  Hz, 1 H), 4.66 (d,  $J = 10.0$  Hz, 1 H), 2.90 – 2.67 (m, 4 H), 2.38 – 2.02 (m, 3 H), 2.00 – 1.82 (m, 2 H), 1.61 – 1.51 (m, 1 H), 1.27 (d,  $J = 6.8$  Hz,

3 H), 1.38 – 1.15 (m, 2 H);  $^{13}\text{C}$  NMR ( $\text{CDCl}_3$ , 125 MHz):  $\delta$  169.9 (C), 135.9 (C), 133.1 (C), 126.7 (C), 122.2 (CH), 119.9 (CH), 118.4 (CH), 110.9 (C), 110.8 (CH), 60.1 (CH), 55.0 (CH), 42.4 (CH), 41.5 ( $\text{CH}_2$ ), 38.8 ( $\text{CH}_2$ ), 35.8 (CH), 34.9 ( $\text{CH}_2$ ), 29.6 ( $\text{CH}_2$ ), 23.0 ( $\text{CH}_3$ ), 21.3 ( $\text{CH}_2$ ); MS ( $m/z$ , relative intensity): 294 ( $\text{M}^+$ , 100), 279 (15), 237 (11), 211 (11), 170 (33), 169 (35), 143 (11), 97 (11), 83 (10), 69 (11), 57 (16); HRMS (GC-EI-TOF)  $m/z$ :  $[\text{M}]^+$  Calcd for  $\text{C}_{19}\text{H}_{22}\text{N}_2\text{O}$  ( $\text{M}^+$ ): 294.1732; found: 294.1728.

Selected data for **11a**: white solid, mp: 149-150 °C (decomposed);  $[\alpha]_{\text{D}}^{27}$   $-30.4$  (c 1,  $\text{CHCl}_3$ );  $^1\text{H}$  NMR ( $\text{CDCl}_3$ , 500 MHz):  $\delta$  7.76 (brs, 1 H), 7.49 (d,  $J = 8.0$  Hz, 1 H), 7.33 (d,  $J = 8.0$  Hz, 1 H), 7.19 – 7.15 (m, 1 H), 7.13 – 7.09 (m, 1 H), 5.15 – 5.12 (m, 1 H), 4.71 (d,  $J = 11.0$  Hz, 1 H), 2.92 – 2.66 (m, 5 H), 2.26 – 1.98 (m, 4 H), 1.74 – 1.66 (m, 1 H), 1.54 – 1.45 (m, 1 H), 1.30 – 1.14 (m, 1 H), 1.19 (d,  $J = 7.3$  Hz, 3 H);  $^{13}\text{C}$  NMR ( $\text{CDCl}_3$ , 125 MHz):  $\delta$  169.0 (C), 136.0 (C), 133.7 (C), 126.6 (C), 122.3 (CH), 119.9 (CH), 118.4 (CH), 110.9 (CH), 110.1 (C), 55.8 (CH), 49.6 (CH), 41.1 ( $\text{CH}_2$ ), 39.3 ( $\text{CH}_2$ ), 35.5 (CH), 34.1 (CH), 33.2 ( $\text{CH}_2$ ), 29.7 ( $\text{CH}_2$ ), 21.2 ( $\text{CH}_2$ ), 17.7 ( $\text{CH}_3$ ).

#### Recrystallization of **10a** (major isomer) for single-crystal X-ray analysis:

Compound **10a** (~3 mg) was placed in a screw cap vial (4 mL vial) and dissolved in ethyl acetate (3 mL). Cover the vial with aluminum foil (with 4-5 holes on it) and place in another 20-mL vial. The 20-mL was closed gently with a screw cap and let stand for 7-8 days until the complete evaporation of the solvent in the inner vial. The crystals formed were subjected to single-crystal X-ray analysis.



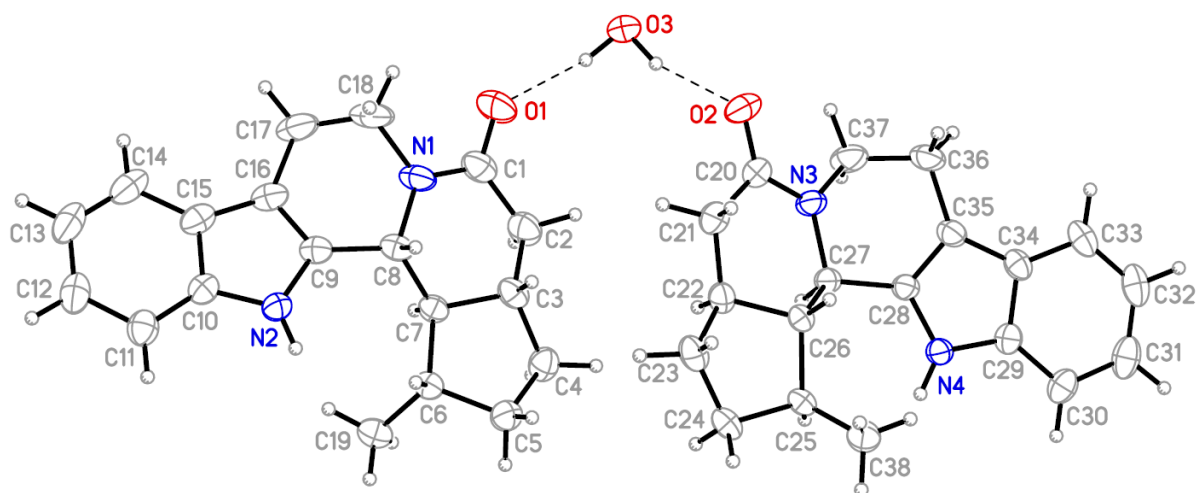

Thermal ellipsoids draw at the 50% probability level

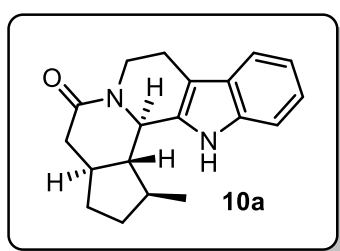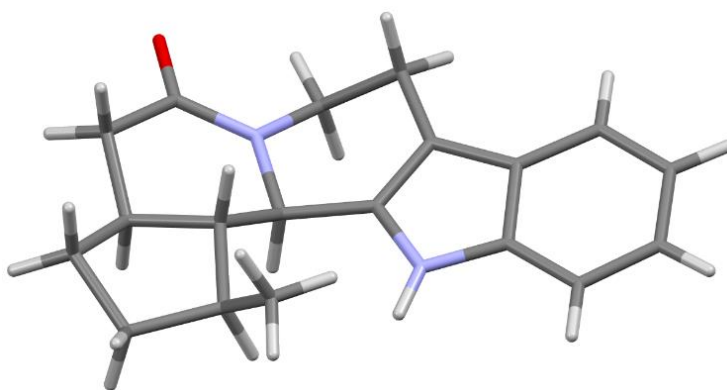

**Figure S2.** ORTEP and Stereo plots for X-ray crystal structures of **10a** (ic21774).

CCDC 2235983 contains the supplementary crystallographic data for **10a** (ic21774). These data can be obtained free of charge from the Cambridge Crystallographic Data Centre via [www.ccdc.cam.ac.uk](http://www.ccdc.cam.ac.uk)

**Table S2.** Crystal data and structure refinement for **10a** (ic21774).

|                                   |                                                               |                   |
|-----------------------------------|---------------------------------------------------------------|-------------------|
| Identification code               | ic21774                                                       |                   |
| Empirical formula                 | C <sub>38</sub> H <sub>46</sub> N <sub>4</sub> O <sub>3</sub> |                   |
| Formula weight                    | 606.79                                                        |                   |
| Temperature                       | 200(2) K                                                      |                   |
| Wavelength                        | 0.71073 Å                                                     |                   |
| Crystal system                    | Triclinic                                                     |                   |
| Space group                       | P1                                                            |                   |
| Unit cell dimensions              | a = 8.6926(4) Å                                               | α = 73.2229(17)°. |
|                                   | b = 10.2171(5) Å                                              | β = 86.5859(18)°. |
|                                   | c = 10.4436(5) Å                                              | γ = 65.2493(15)°. |
| Volume                            | 804.46(7) Å <sup>3</sup>                                      |                   |
| Z                                 | 1                                                             |                   |
| Density (calculated)              | 1.252 Mg/m <sup>3</sup>                                       |                   |
| Absorption coefficient            | 0.080 mm <sup>-1</sup>                                        |                   |
| F(000)                            | 326                                                           |                   |
| Crystal size                      | 0.229 x 0.169 x 0.064 mm <sup>3</sup>                         |                   |
| Theta range for data collection   | 2.294 to 30.000°.                                             |                   |
| Index ranges                      | -12 ≤ h ≤ 12, -14 ≤ k ≤ 14, -14 ≤ l ≤ 14                      |                   |
| Reflections collected             | 25318                                                         |                   |
| Independent reflections           | 9341 [R(int) = 0.0351]                                        |                   |
| Completeness to theta = 25.242°   | 99.8 %                                                        |                   |
| Absorption correction             | Semi-empirical from equivalents                               |                   |
| Max. and min. transmission        | 0.9604 and 0.8889                                             |                   |
| Refinement method                 | Full-matrix least-squares on F <sup>2</sup>                   |                   |
| Data / restraints / parameters    | 9341 / 6 / 415                                                |                   |
| Goodness-of-fit on F <sup>2</sup> | 1.077                                                         |                   |
| Final R indices [I > 2σ(I)]       | R1 = 0.0466, wR2 = 0.0920                                     |                   |
| R indices (all data)              | R1 = 0.0649, wR2 = 0.1051                                     |                   |
| Absolute structure parameter      | -0.5(5)                                                       |                   |
| Extinction coefficient            | 0.047(6)                                                      |                   |
| Largest diff. peak and hole       | 0.195 and -0.183 e.Å <sup>-3</sup>                            |                   |

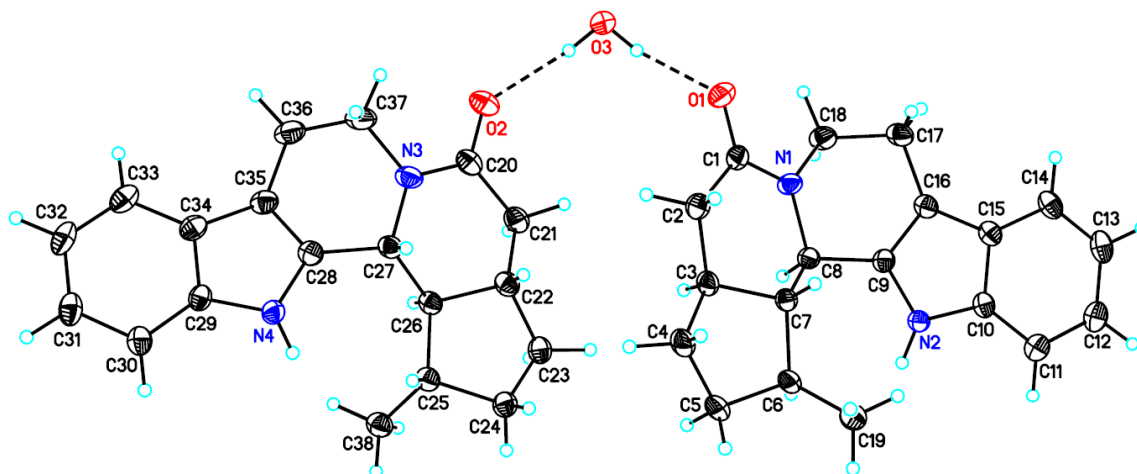

Thermal ellipsoids draw at the 50% probability level

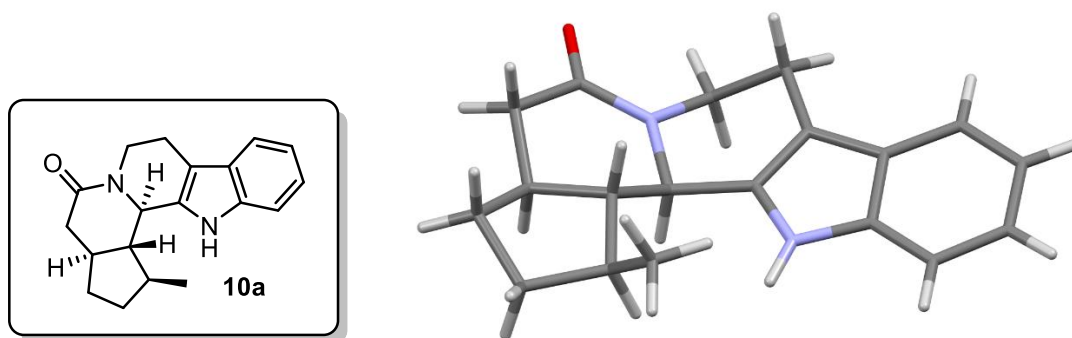

**Figure S3.** ORTEP and Stereo plots for X-ray crystal structures of **10a**, **another crystal** (ic21796).

CCDC 2236742 contains the supplementary crystallographic data for **10a**, **another crystal** (ic21796). These data can be obtained free of charge from the Cambridge Crystallographic Data Centre via [www.ccdc.cam.ac.uk](http://www.ccdc.cam.ac.uk)

**Table S3.** Crystal data and structure refinement for **10a**, another crystal (ic21796).

|                                    |                                                                  |                   |
|------------------------------------|------------------------------------------------------------------|-------------------|
| Identification code                | ic21796                                                          |                   |
| Empirical formula                  | C <sub>19</sub> H <sub>23</sub> N <sub>2</sub> O <sub>1.50</sub> |                   |
| Formula weight                     | 303.39                                                           |                   |
| Crystal system                     | Triclinic                                                        |                   |
| Space group                        | P1                                                               |                   |
| Unit cell dimensions               | a = 8.6495(4) Å                                                  | α = 72.9361(19)°. |
|                                    | b = 10.1461(5) Å                                                 | β = 86.3302(18)°. |
|                                    | c = 10.4409(5) Å                                                 | γ = 65.6886(17)°. |
| Volume                             | 796.57(7) Å <sup>3</sup>                                         |                   |
| Z                                  | 2                                                                |                   |
| F(000)                             | 326                                                              |                   |
| Density (calculated)               | 1.265 Mg/m <sup>3</sup>                                          |                   |
| Wavelength                         | 1.54178 Å                                                        |                   |
| Cell parameters reflections used   | 9847                                                             |                   |
| Theta range for Cell parameters    | 4.44 to 78.11°.                                                  |                   |
| Absorption coefficient             | 0.634 mm <sup>-1</sup>                                           |                   |
| Temperature                        | 100(2) K                                                         |                   |
| Crystal size                       | 0.200 x 0.100 x 0.050 mm <sup>3</sup>                            |                   |
| Data collection                    |                                                                  |                   |
| Diffractometer                     | Bruker AXS D8 VENTURE, PhotonIII_C28                             |                   |
| Absorption correction              | Semi-empirical from equivalents                                  |                   |
| Max. and min. transmission         | 1.0000 and 0.8635                                                |                   |
| No. of measured reflections        | 25517                                                            |                   |
| No. of independent reflections     | 6039 [R(int) = 0.0355]                                           |                   |
| No. of observed [I>2 $\sigma$ (I)] | 5925                                                             |                   |
| Completeness to theta = 67.679°    | 99.3 %                                                           |                   |
| Theta range for data collection    | 4.439 to 78.353°.                                                |                   |
| Refinement                         |                                                                  |                   |
| Final R indices [I>2 $\sigma$ (I)] | R1 = 0.0393, wR2 = 0.1019                                        |                   |
| R indices (all data)               | R1 = 0.0401, wR2 = 0.1031                                        |                   |
| Goodness-of-fit on F <sup>2</sup>  | 1.021                                                            |                   |
| No. of reflections                 | 6039                                                             |                   |
| No. of parameters                  | 412                                                              |                   |
| No. of restraints                  | 3                                                                |                   |
| Absolute structure parameter       | 0.12(17)                                                         |                   |
| Largest diff. peak and hole        | 0.266 and -0.166 e.Å <sup>-3</sup>                               |                   |

### Preparation of indoleamide **10b**.

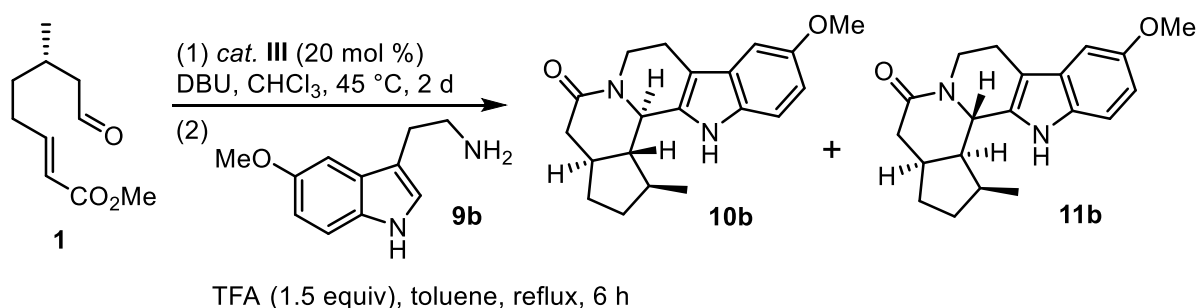

To a mixture of **1** (25 mg 0.14 mmol) and catalyst **III** (9 mg, 0.03 mmol, 0.2 equiv), and  $\text{CHCl}_3$  (0.5 mL) in a 25-mL pear-shaped flask was added DBU (4.2 mg, 0.03 mmol, 0.2 equiv) at ambient temperature. The resulting solution was stirred at 45 °C for 48 h until the completion of the reaction, as monitored by TLC. The reaction solution was concentrated *in vacuo* to give the residue, which was then employed directly in the subsequent process without further purification.

To a solution of the above crude product in toluene (14 mL) was added 5-methoxytryptamine (38.7 mg, 0.20 mmol, 1.5 equiv) and TFA (23.2 mg, 0.20 mmol, 1.5 equiv) at ambient temperature. The resulting solution was heated to reflux with the Dean-Stark trap for 6 h until the completion of the reaction, as monitored by TLC. The solution was neutralized by the addition of an aqueous  $\text{NaHCO}_3$  solution, monitored by pH paper. The mixture was extracted with EtOAc (20 mL x 2). The combined organic solution was washed with brine, dried over  $\text{Na}_2\text{SO}_4$ , and concentrated *in vacuo* to give a crude oil. The diastereomeric ratio, as determined by  $^1\text{H}$  NMR analysis of the crude mixture, was found to be 84:16. The crude product was purified by flash column chromatography with 0 to 35 % EtOAc-hexane as eluent ( $R_f = 0.45$  for **10b** and **11b** in 70 % EtOAc-hexane) to afford products **10b** and **11b** (25.7 mg, 58% yield). Purification of the mixture using prolonged flash column chromatography resulted in the isolation of pure samples of **10b** for analysis.

Selected data for **10b**: white solid; mp 219–220 °C;  $[\alpha]_{\text{D}}^{25}$  93.5 ( $c$  1,  $\text{CHCl}_3$ ); IR (neat): 3371, 2929, 2878, 1622, 1462, 1411, 1265, 1211, 1031, 916, 797, 626  $\text{cm}^{-1}$ ;  $^1\text{H}$  NMR ( $\text{CDCl}_3$ , 500 MHz):  $\delta$  7.70 (brs, 1 H), 7.20 (d,  $J = 8.7$  Hz, 1 H), 6.93 (d,  $J = 2.5$  Hz, 1 H), 6.82 (dd,  $J = 8.7, 2.5$  Hz, 1 H), 5.10 – 5.05 (m, 1 H), 4.64 (d,  $J = 10.0$  Hz, 1 H), 3.84 (s, 3 H), 2.86 – 2.64 (m, 4 H), 2.30 – 2.22 (m, 1 H), 2.21 (dd,  $J = 17.0, 12.6$  Hz, 1 H), 2.13 – 2.02 (m, 1 H), 1.99 – 1.81 (m, 2 H), 1.58 – 1.51 (m, 1 H), 1.35 – 1.22 (m, 2 H), 1.26 (d,  $J = 6.8$  Hz, 3 H);  $^{13}\text{C}$  NMR ( $\text{CDCl}_3$ , 125 MHz):  $\delta$  169.9 (C), 154.4 (C), 134.0 (C), 130.9 (C), 127.1 (C), 112.2 (CH), 111.5 (CH), 110.7 (C), 100.4 (CH), 60.1 (CH), 55.9 (CH<sub>3</sub>), 55.0 (CH), 42.3 (CH), 41.5 (CH<sub>2</sub>), 38.8 (CH<sub>2</sub>), 35.8 (CH), 34.9 (CH<sub>2</sub>), 29.6 (CH<sub>2</sub>), 23.0 (CH<sub>3</sub>), 21.3 (CH<sub>2</sub>); HRMS (HPLC-ESI-TOF)  $m/z$ :  $[\text{M}+\text{H}]^+$  Calcd for  $\text{C}_{20}\text{H}_{25}\text{N}_2\text{O}_2$ : 325.1916; found: 325.1912.

Selected data for **11b** from the mixture of **10b** and **11b**: 169.9 (C),<sup>§</sup> 154.4 (C),<sup>§</sup> 134.0 (C),<sup>§</sup>

130.9 (C),<sup>§</sup> 127.1 (C),<sup>§</sup> 112.22 (CH),\* 111.6, (CH),\* 109.9 (C),\* 100.4 (CH),<sup>§</sup> 55.90 (CH<sub>3</sub>),\* 55.8 (CH),\* 49.6 (CH),\* 41.1 (CH<sub>2</sub>),\* 39.3 (CH<sub>2</sub>),\* 35.5 (CH),\* 34.0 (CH),\* 33.2 (CH<sub>2</sub>),\* 29.7 (CH<sub>2</sub>),\* 21.2 (CH<sub>2</sub>),\* 17.7 (CH<sub>3</sub>).<sup>\*</sup> <sup>§</sup>Overlap with major isomer **10b**; <sup>\*</sup>peaks of **11b**.

### Preparation of indoleamide **10c**

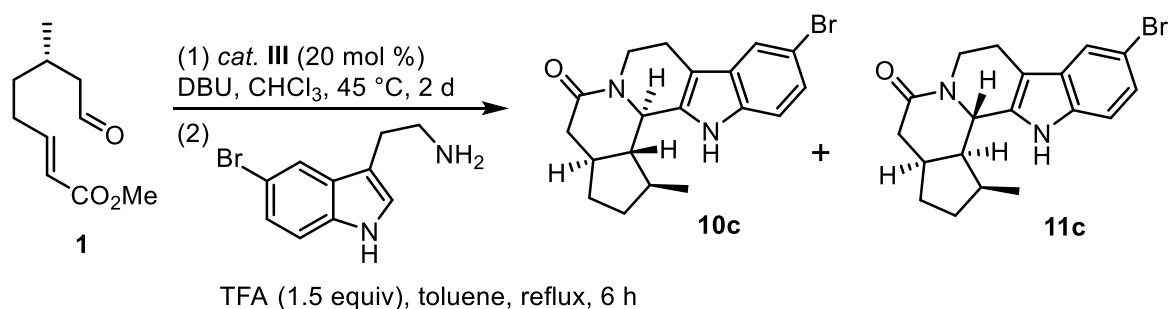

To a mixture of **1** (25 mg 0.14 mmol) and catalyst **III** (9 mg, 0.03 mmol, 0.2 equiv), and CHCl<sub>3</sub> (0.5 mL) in a 25-mL pear-shaped flask was added DBU (4.2 mg, 0.03 mmol, 0.2 equiv) at ambient temperature. The resulting solution was stirred at 45 °C for 48 h until the completion of the reaction, as monitored by TLC. The reaction solution was concentrated *in vacuo* to give the residue, which was then employed directly in the subsequent process without further purification.

To a solution of the above crude product in toluene (14 mL) was added 5-bromotryptamine (48.6 mg, 0.20 mmol, 1.5 equiv) and TFA (23.2 mg, 0.20 mmol, 1.5 equiv) at ambient temperature. The resulting solution was heated to reflux with the Dean-Stark trap for 6 h until the completion of the reaction, as monitored by TLC. The solution was neutralized by the addition of an aqueous NaHCO<sub>3</sub> solution, monitored by pH paper. The mixture was extracted with EtOAc (20 mL x 2). The combined organic solution was washed with brine, dried over Na<sub>2</sub>SO<sub>4</sub>, and concentrated *in vacuo* to give a crude oil. The diastereomeric ratio, as determined by <sup>1</sup>H NMR analysis of the crude mixture, was found to be 82:18. The crude product was purified by flash column chromatography with 0 to 35 % EtOAc-hexane as eluent (*R<sub>f</sub>* = 0.51 for **10c** and *R<sub>f</sub>* = 0.52 **11c** in 70 % EtOAc-hexane) to afford products **10c** and **11c** (31.2 mg, 62% yield). Purification of the mixture using prolonged flash column chromatography resulted in the isolation of pure samples of **10c** and **11c** for analysis.

Selected data for **10c**: mp: 226-227 °C (decomposed); [α]<sub>D</sub><sup>27</sup> 128.8 (*c* 1, CHCl<sub>3</sub>); IR (neat): 3289, 2947, 2865, 1619, 1408, 1306, 799, 755 cm<sup>-1</sup>; <sup>1</sup>H NMR (CDCl<sub>3</sub>, 500 MHz): δ 7.87 (brs, 1 H), 7.61 (d, *J* = 1.9 Hz, 1 H), 7.24 (dd, *J* = 8.5, 1.9 Hz, 1 H), 7.18 (dd, *J* = 8.5 Hz, 1 H), 5.10 – 5.05 (m, 1 H), 4.64 (d, *J* = 10.0 Hz, 1 H), 2.85 – 2.72 (m, 3 H), 2.68 – 2.63 (m, 1 H), 2.30 – 2.24 (m, 1 H), 2.21 (dd, *J* = 17.1, 12.6 Hz, 1 H), 2.14 – 2.01 (m, 1 H), 2.00 – 1.81 (m, 2 H), 1.60 – 1.52 (m, 1 H), 1.36 – 1.21 (m, 2 H), 1.26 (d, *J* = 6.8 Hz, 3 H); <sup>13</sup>C NMR

(CDCl<sub>3</sub>, 125 MHz):  $\delta$  169.8 (C), 134.5 (C), 134.5 (C), 128.5 (C), 125.0 (CH), 121.1 (CH), 113.1 (C), 112.2 (CH), 110.6 (C), 59.9 (CH), 54.8 (CH), 42.4 (CH), 41.4 (CH<sub>2</sub>), 38.8 (CH<sub>2</sub>), 35.8 (CH), 34.9 (CH<sub>2</sub>), 29.6 (CH<sub>2</sub>), 23.0 (CH<sub>3</sub>), 21.1 (CH<sub>2</sub>); HRMS (HPLC-ESI-TOF)  $m/z$ : [M-H]<sup>+</sup> Calcd for C<sub>19</sub>H<sub>20</sub>BrN<sub>2</sub>O: 371.0759; found: 371.0759.

Selected data for **11c**: white solid, 275-276 °C; [α]<sub>D</sub><sup>22</sup> -52.1 (*c* 1, CHCl<sub>3</sub>); <sup>1</sup>H NMR (CDCl<sub>3</sub>, 500 MHz):  $\delta$  7.82 (brs, 1 H), 7.60 (d, *J* = 1.9 Hz, 1 H), 7.24 (dd, *J* = 8.6, 1.9 Hz, 1 H), 7.19 (d, *J* = 8.6 Hz, 1 H), 5.16 – 5.09 (m, 1 H), 4.68 (d, *J* = 11.0 Hz, 1 H), 2.88 – 2.74 (m, 3 H), 2.73 – 2.63 (m, 2 H), 2.26 – 2.16 (m, 1 H), 2.15 – 1.98 (m, 3 H), 1.72 – 1.63 (m, 1 H), 1.55 – 1.46 (m, 1 H), 1.25 – 1.15 (m, 1 H), 1.18 (d, *J* = 7.3 Hz, 3 H); <sup>13</sup>C NMR (CDCl<sub>3</sub>, 125 MHz):  $\delta$  168.9 (C), 135.1 (C), 134.6 (C), 128.4 (C), 125.0 (CH), 121.1 (CH), 113.1 (C), 112.3 (CH), 109.8 (C), 55.7 (CH), 49.4 (CH), 41.0 (CH<sub>2</sub>), 39.2 (CH<sub>2</sub>), 35.6 (CH), 34.0 (CH), 33.1 (CH<sub>2</sub>), 29.7 (CH<sub>2</sub>), 21.0 (CH<sub>2</sub>), 17.7 (CH<sub>3</sub>).

### Preparation of indoleamide **10d**.

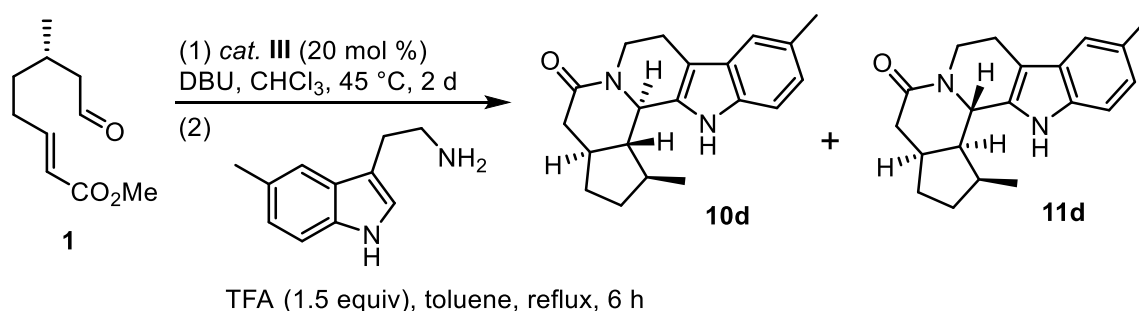

To a mixture of **1** (25 mg 0.14 mmol) and catalyst **III** (9 mg, 0.03 mmol, 0.2 equiv), and CHCl<sub>3</sub> (0.5 mL) in a 25-mL pear-shaped flask was added DBU (4.2 mg, 0.03 mmol, 0.2 equiv) at ambient temperature. The resulting solution was stirred at 45 °C for 48 h until the completion of the reaction, as monitored by TLC. The reaction solution was concentrated *in vacuo* to give the residue, which was then employed directly in the subsequent process without further purification.

To a solution of the above crude product in toluene (14 mL) was added 5-methyltryptamine (35.4 mg, 0.20 mmol, 1.5 equiv) and TFA (23.2 mg, 0.20 mmol, 1.5 equiv) at ambient temperature. The resulting solution was heated to reflux with the Dean-Stark trap for 6 h until the completion of the reaction, as monitored by TLC. The solution was neutralized by the addition of an aqueous NaHCO<sub>3</sub> solution, monitored by pH paper. The mixture was extracted with EtOAc (20 mL x 2). The combined organic solution was washed with brine, dried over Na<sub>2</sub>SO<sub>4</sub>, and concentrated *in vacuo* to give a crude oil. The diastereomeric ratio, as determined by <sup>1</sup>H NMR analysis of the crude mixture, was found to be 88:12. The crude product was purified by flash column chromatography with 0 to 35 % EtOAc-hexane as eluent

( $R_f = 0.43$  for **10d** and **10d** in 70 % EtOAc-hexane) to afford products **10d** and **11d** (23.2 mg, 55 % yield). Purification of the mixture using prolonged flash column chromatography resulted in the isolation of pure samples of **10d** for analysis.

Selected data for **10d**: mp 218–219 °C;  $[\alpha]_D^{27}$  107.0 ( $c$  1, CHCl<sub>3</sub>); IR (neat): 3303, 2945, 2862, 1625, 1406, 1310, 1232, 795 cm<sup>-1</sup>; <sup>1</sup>H NMR (CDCl<sub>3</sub>, 500 MHz):  $\delta$  7.71 (brs, 1 H), 7.27 (s, 1 H), 7.20 (d,  $J = 8.0$  Hz, 1 H), 6.99 (dd,  $J = 8.0$  Hz, 1 H), 5.10 – 5.04 (m, 1 H), 4.64 (d,  $J = 10.0$  Hz, 1 H), 2.90 – 2.64 (m, 4 H), 2.42 (s, 3 H), 2.32 – 2.25 (m, 1 H), 2.21 (dd,  $J = 17.1, 12.6$  Hz, 1 H), 2.13 – 2.00 (m, 1 H), 1.99 – 1.79 (m, 2 H), 1.56 – 1.50 (m, 1 H), 1.35 – 1.26 (m, 2 H), 1.25 (d,  $J = 7.0$  Hz, 3 H); <sup>13</sup>C NMR (CDCl<sub>3</sub>, 125 MHz):  $\delta$  169.9 (C), 134.2 (C), 133.2 (C), 129.2 (C), 126.9 (C), 123.7 (CH), 118.2 (CH), 110.44 (CH), 110.40 (C), 60.1 (CH), 55.1 (CH), 42.4 (CH), 41.5 (CH<sub>2</sub>), 38.8 (CH<sub>2</sub>), 35.8 (CH), 34.9 (CH<sub>2</sub>), 29.6 (CH<sub>2</sub>), 23.0 (CH<sub>3</sub>), 21.4 (CH<sub>3</sub>), 21.3 (CH<sub>2</sub>); HRMS (HPLC-ESI-TOF)  $m/z$ :  $[M+H]^+$  Calcd for C<sub>20</sub>H<sub>25</sub>N<sub>2</sub>O: 309.1967; found: 309.1959.

### Preparation of indoleamide **10e**.

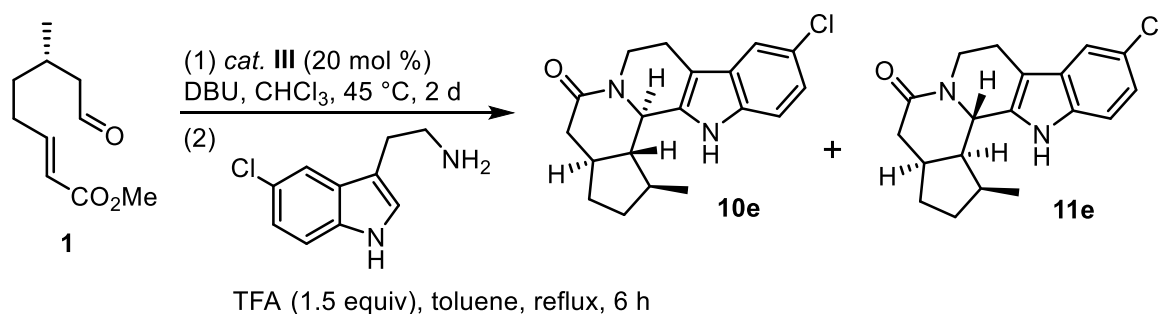

To a mixture of **1** (25 mg 0.14 mmol) and catalyst **III** (9 mg, 0.03 mmol, 0.2 equiv), and CHCl<sub>3</sub> (0.5 mL) in a 25-mL pear-shaped flask was added DBU (4.2 mg, 0.03 mmol, 0.2 equiv) at ambient temperature. The resulting solution was stirred at 45 °C for 48 h until the completion of the reaction, as monitored by TLC. The reaction solution was concentrated *in vacuo* to give the residue, which was then employed directly in the subsequent process without further purification.

To a solution of the above crude product in toluene (14 mL) was added 5-chlorotryptamine (39.7 mg, 0.20 mmol, 1.5 equiv) and TFA (23.2 mg, 0.20 mmol, 1.5 equiv) at ambient temperature. The resulting solution was heated to reflux with the Dean-Stark trap for 6 h until the completion of the reaction, as monitored by TLC. The solution was neutralized by the addition of an aqueous NaHCO<sub>3</sub> solution, monitored by pH paper. The mixture was extracted with EtOAc (20 mL x 2). The combined organic solution was washed with brine, dried over Na<sub>2</sub>SO<sub>4</sub>, and concentrated *in vacuo* to give a crude oil. The diastereomeric ratio, as determined by <sup>1</sup>H NMR analysis of the crude mixture, was found to be 83:17. The crude product was



purified by flash column chromatography with 0 to 35 % EtOAc-hexane as eluent ( $R_f = 0.47$  for **10e** and  $R_f = 0.48$  **11e** in 70 % EtOAc-hexane) to afford products **10e** and **11e** (28.3 mg, 63% yield). Purification of the mixture using prolonged flash column chromatography resulted in the isolation of pure samples of **10e** and **11e** for analysis.

Selected data for **10e**: white solid; mp 241–242 °C;  $[\alpha]_D^{27}$  100.6 (c 1, CHCl<sub>3</sub>); IR (neat): 3300, 2947, 2867, 1619, 1464, 1406, 1306, 1051, 800, 755, 660 cm<sup>-1</sup>; <sup>1</sup>H NMR (CDCl<sub>3</sub>, 500 MHz):  $\delta$  7.86 (s, 1 H), 7.45 (d,  $J = 2.0$  Hz, 1 H), 7.23 (d,  $J = 8.6$  Hz, 1 H), 7.11 (dd,  $J = 8.6$ , 2.0 Hz, 1 H), 5.10 – 5.05 (m, 1 H), 4.64 (d,  $J = 10.0$  Hz, 1 H), 2.86 – 2.72 (m, 3 H), 2.69 – 2.63 (m, 1 H), 2.31 – 2.24 (m, 1 H), 2.21 (dd,  $J = 17.0$ , 12.6 Hz, 1 H), 2.16 – 2.02 (m, 1 H), 2.01 – 1.90 (m, 1 H), 1.89 – 1.82 (m, 1 H), 1.60 – 1.51 (m, 1 H), 1.35 – 1.22 (m, 2 H) 1.26 (d,  $J = 6.8$  Hz, 3 H); <sup>13</sup>C NMR (CDCl<sub>3</sub>, 125 MHz):  $\delta$  169.8 (C), 134.6 (C), 134.2 (C), 127.8 (C), 125.6 (C), 122.5 (CH), 118.0 (CH), 111.8 (CH), 110.7 (C), 59.9 (CH), 54.8 (CH), 42.4 (CH), 41.4 (CH<sub>2</sub>), 38.8 (CH<sub>2</sub>), 35.9 (CH), 34.9 (CH<sub>2</sub>), 29.6 (CH<sub>2</sub>), 23.0 (CH<sub>3</sub>), 21.2 (CH<sub>2</sub>); HRMS (HPLC-ESI-TOF)  $m/z$ :  $[M-H]^+$  Calcd for C<sub>19</sub>H<sub>20</sub>ClN<sub>2</sub>O: 327.1264; found: 327.1262.

Selected data for **11e**: white solid; mp 188–189 °C (decomposed);  $[\alpha]_D^{27}$  –39.9 (c 1, CHCl<sub>3</sub>); IR (neat): 3350, 2957, 2860, 1623, 1456, 1261, 1099, 1018, 803, 758 cm<sup>-1</sup>; <sup>1</sup>H NMR (CDCl<sub>3</sub>, 500 MHz):  $\delta$  7.79 (brs, 1 H), 7.44 (d,  $J = 2.0$  Hz, 1 H), 7.23 (d,  $J = 8.5$  Hz, 1 H), 7.11 (dd,  $J = 8.5$ , 2.0 Hz, 1 H), 5.17 – 5.08 (m, 1 H), 4.68 (d,  $J = 11.0$  Hz, 1 H), 2.88 – 2.75 (m, 3 H), 2.73 – 2.64 (m, 2 H), 2.25 – 2.17 (m, 1 H), 2.15 – 1.99 (m, 4 H), 1.73 – 1.64 (m, 1 H), 1.61 – 1.46 (m, 1 H), 1.18 (d,  $J = 7.3$  Hz, 3 H); <sup>13</sup>C NMR (CDCl<sub>3</sub>, 125 MHz):  $\delta$  168.9 (C), 135.3 (C), 134.3 (C), 127.8 (C), 125.6 (C), 122.5 (CH), 118.1 (CH), 111.9 (CH), 109.9 (C), 55.7 (CH), 49.4 (CH), 41.0 (CH<sub>2</sub>), 39.2 (CH<sub>2</sub>), 35.6 (CH), 34.0 (CH), 33.2 (CH<sub>2</sub>), 29.7 (CH<sub>2</sub>), 21.0 (CH<sub>2</sub>), 17.7 (CH<sub>3</sub>).

### Recrystallization of **11e** (minor isomer) for single-crystal X-ray analysis:

Compound **11e** (~2.5 mg) in a screw-capped vial (4 mL vial) was dissolved in CHCl<sub>3</sub> (~0.5 mL), and diluted with hexane (~2.5 mL). The vial was covered with aluminum foil (with 4–5 holes on it) and placed in another 20-mL vial filled with n-hexane (~8 mL). The 20-mL was closed gently with a screw cap and let stand for 6–7 days until the solvent in the inner vial has completely evaporated. The crystals formed were subjected to single-crystal X-ray analysis.

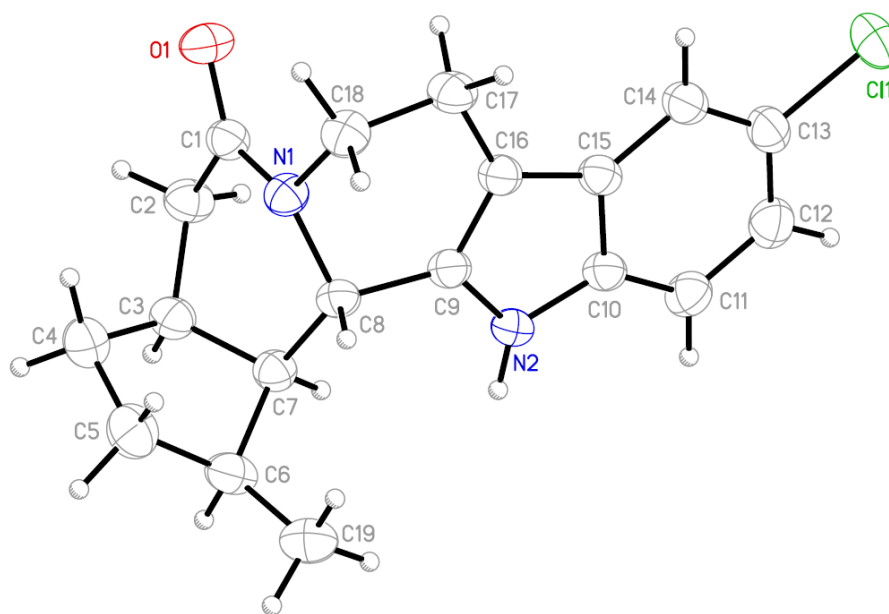

Thermal ellipsoids draw at the 50% probability level

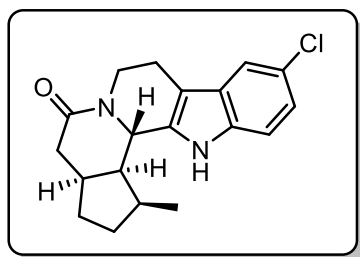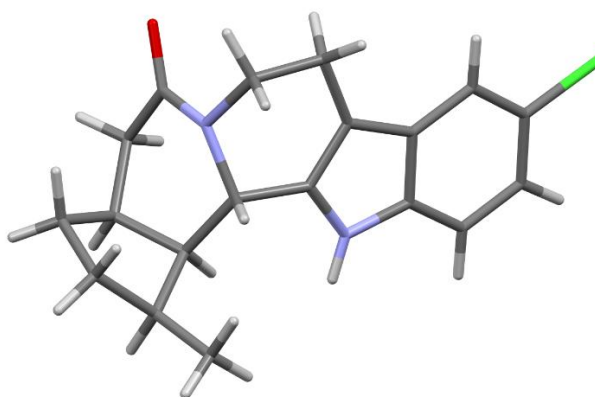

**Figure S4.** ORTEP and Stereo plots for X-ray crystal structures of **11e** (ic21750).

CCDC 2235984 contains the supplementary crystallographic data for **11e** (ic21750). These data can be obtained free of charge from the Cambridge Crystallographic Data Centre via [www.ccdc.cam.ac.uk](http://www.ccdc.cam.ac.uk)

**Table S4.** Crystal data and structure refinement for **11e** (ic21750).

|                                   |                                                     |          |
|-----------------------------------|-----------------------------------------------------|----------|
| Identification code               | ic21750                                             |          |
| Empirical formula                 | C <sub>19</sub> H <sub>21</sub> Cl N <sub>2</sub> O |          |
| Formula weight                    | 328.83                                              |          |
| Temperature                       | 200(2) K                                            |          |
| Wavelength                        | 0.71073 Å                                           |          |
| Crystal system                    | Orthorhombic                                        |          |
| Space group                       | P2 <sub>1</sub> 2 <sub>1</sub> 2 <sub>1</sub>       |          |
| Unit cell dimensions              | a = 7.2485(2) Å                                     | α = 90°. |
|                                   | b = 10.0179(3) Å                                    | β = 90°. |
|                                   | c = 22.3054(7) Å                                    | γ = 90°. |
| Volume                            | 1619.70(8) Å <sup>3</sup>                           |          |
| Z                                 | 4                                                   |          |
| Density (calculated)              | 1.348 Mg/m <sup>3</sup>                             |          |
| Absorption coefficient            | 0.242 mm <sup>-1</sup>                              |          |
| F(000)                            | 696                                                 |          |
| Crystal size                      | 0.540 x 0.418 x 0.034 mm <sup>3</sup>               |          |
| Theta range for data collection   | 2.229 to 27.497°.                                   |          |
| Index ranges                      | -9 ≤ h ≤ 9, -13 ≤ k ≤ 12, -28 ≤ l ≤ 24              |          |
| Reflections collected             | 24516                                               |          |
| Independent reflections           | 3712 [R(int) = 0.0361]                              |          |
| Completeness to theta = 25.242°   | 99.9 %                                              |          |
| Absorption correction             | Semi-empirical from equivalents                     |          |
| Max. and min. transmission        | 0.9604 and 0.8231                                   |          |
| Refinement method                 | Full-matrix least-squares on F <sup>2</sup>         |          |
| Data / restraints / parameters    | 3712 / 0 / 213                                      |          |
| Goodness-of-fit on F <sup>2</sup> | 1.122                                               |          |
| Final R indices [I > 2σ(I)]       | R1 = 0.0420, wR2 = 0.0890                           |          |
| R indices (all data)              | R1 = 0.0519, wR2 = 0.0975                           |          |
| Absolute structure parameter      | 0.02(3)                                             |          |
| Extinction coefficient            | n/a                                                 |          |
| Largest diff. peak and hole       | 0.261 and -0.230 e.Å <sup>-3</sup>                  |          |

**Reaction of aldehyde 1 with cat. III–HOAc (0.2 equiv) in CH<sub>3</sub>CN:**

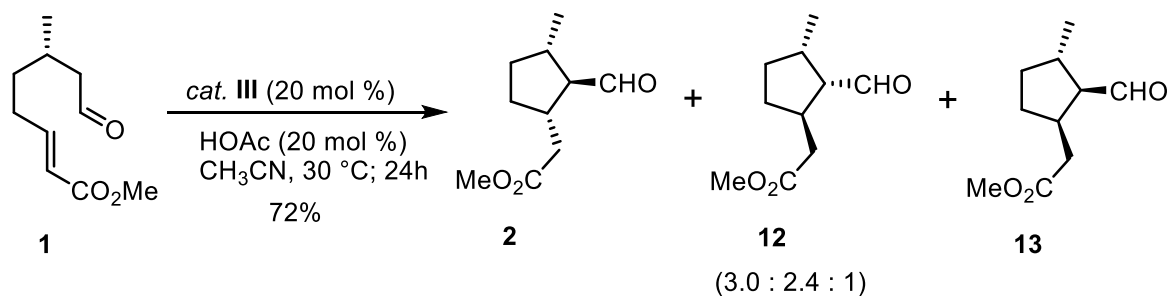

To a solution of catalyst **III** (188.9 mg, 0.58 mmol, 0.20 equiv) and **1** (535.0 mg, 2.90 mmol) in CH<sub>3</sub>CN (9.6 mL) was added acetic acid (33 μL, 0.58 mmol, 0.20 equiv) at ambient temperature. The resulting solution was stirred at 30 °C for 24 h until the completion of the reaction, as monitored by TLC. The reaction solution was diluted with EtOAc, and washed with water and brine. The combined organic solution was dried over Na<sub>2</sub>SO<sub>4</sub> and concentrated *in vacuo* to give a crude oil. The crude product was purified by flash column chromatography with 5% EtOAc-hexane (*R<sub>f</sub>* = 0.51 in 20% EtOAc-hexane) to afford products **2** and **12** (ratio 1:1; 349.8 mg, 65% yield; *R<sub>f</sub>* = 0.51 in 20% EtOAc-hexane) as a colorless oil and **13** (37.8 mg; 7% yield, *R<sub>f</sub>* = 0.52 in 20% EtOAc-hexane) for analysis.

Selected data for **12** (**12** denoted by an asterisk, identified from the mixture with **2**): <sup>1</sup>H NMR (CDCl<sub>3</sub>, 500 MHz): δ 9.73 (d, *J* = 3.0 Hz, 1 H\*), 9.54 (d, *J* = 3.9 Hz, 1 H), 3.62 (s, 3 H), 3.61 (s, 3 H\*), 2.81 – 2.72 (m, 1 H\*), 2.66 – 2.55 (m, 1 H), 2.54 – 2.43 (m, 1 H\*), 2.37 (d, *J* = 7.4 Hz, 2 H), 2.34 (dd, *J* = 7.2, 5.7 Hz, 2 H\*), 2.24 – 2.14 (m, 1 H), 2.09 – 2.00 (m, 1 H\*), 2.00 – 1.83 (m, 3 H and 2 H\*), 1.48 – 1.39 (m, 1 H), 1.38 – 1.25 (m, 1 H and 2 H\*), 1.03 (d, *J* = 6.7 Hz, 3 H), 1.00 (d, *J* = 6.9 Hz, 3 H\*); <sup>13</sup>C NMR (CDCl<sub>3</sub>, 125 MHz): δ 204.5 (CH),\* 203.2 (CH), 172.88 (C),\* 172.74 (C), 65.8 (CH), 60.3 (CH),\* 51.53 (CH<sub>3</sub>), 51.50 (CH<sub>3</sub>),\* 39.28 (CH<sub>2</sub>),\* 39.25 (CH<sub>2</sub>), 37.5 (CH), 37.1 (CH),\* 36.8 (CH), 35.2 (CH),\* 34.3 (CH<sub>2</sub>),\* 33.3 (CH<sub>2</sub>), 31.5 (CH<sub>2</sub>),\* 31.3 (CH<sub>2</sub>), 19.5 (CH<sub>3</sub>), 16.5 (CH<sub>3</sub>).\*

### Preparation of (+)-7-*epi*-boschnialactone **14**

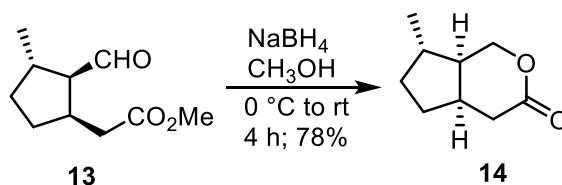

To a stirred solution of **13** (50.0 mg, 0.27 mmol) in MeOH (5 mL) was added NaBH<sub>4</sub> (20.5 mg, 0.54 mmol, 2.0 equiv) at 0 °C. The resulting solution was stirred at room temperature for 4 h until the completion of the reaction, as monitored by TLC. The reaction was quenched by the addition of an aqueous solution of 2N HCl (0.5 mL). The reaction mixture was diluted with EtOAc, and washed with water and brine. The combined organic solution was dried over Na<sub>2</sub>SO<sub>4</sub> and concentrated *in vacuo* to give a crude oil. The crude product was purified by flash column chromatography with 0 to % EtOAc-hexane ( $R_f = 0.45$  in 30 % EtOAc-hexane) to afford product **14** (32.8 mg, 78% yield) as a white solid. Selected data for **14**: m.p. 56–57 °C;  $[\alpha]_D^{22} +94.2$  ( $c$  0.8, CHCl<sub>3</sub>); <sup>1</sup>H NMR (CDCl<sub>3</sub>, 500 MHz):  $\delta$  4.25 (dd,  $J = 11.5, 4.5$  Hz, 1 H), 4.08 (dd,  $J = 11.5, 4.5$  Hz, 1 H), 2.63 – 2.53 (m, 2 H), 2.35 – 2.29 (m, 1 H), 2.02 – 1.95 (m, 1 H), 1.89 – 1.74 (m, 3 H), 1.26 – 1.08 (m, 2 H), 1.04 (d,  $J = 6.0$  Hz, 3 H);<sup>5</sup> <sup>13</sup>C NMR (CDCl<sub>3</sub>, 125 MHz):  $\delta$  173.7 (C), 69.0 (CH<sub>2</sub>), 44.6 (CH), 37.5 (CH), 34.82 (CH), 34.81 (CH<sub>2</sub>), 34.6 (CH<sub>2</sub>), 33.4 (CH<sub>2</sub>), 18.7 (CH<sub>3</sub>); HRMS (HPLC-ESI-TOF)  $m/z$ :  $[M+Na]^+$  Calcd for C<sub>9</sub>H<sub>14</sub>NaO<sub>2</sub>: 177.08915; found: 177.08918.

### Reduction of the mixture of **2**, **12**, and **13**

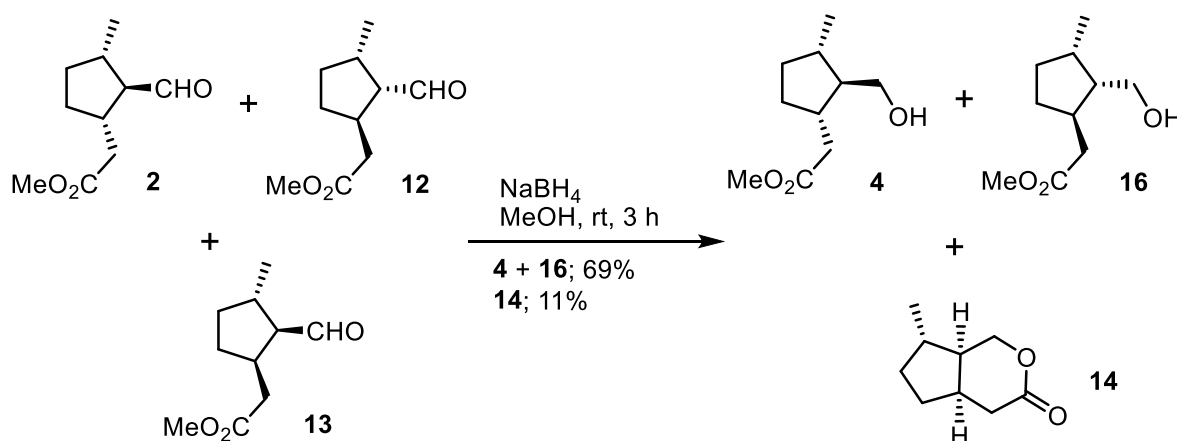

To a stirred solution of the mixture of **2**, **12**, and **13** (50.0 mg, 0.27 mmol) in MeOH (5 mL) was added NaBH<sub>4</sub> (20.5 mg, 0.54 mmol, 2.0 equiv) at 0 °C. The resulting solution was

<sup>5</sup> Tanaka, D.; Yoshino, T.; Kouno, I.; Miyashita, M.; Irie, H. *Tetrahedron*, **1993**, *49*, 10253 – 10262. (b) Inoue, T.; Kitagawa, O.; Saito, A.; Taguchi, T. *J. Org. Chem.* **1997**, *62*, 7384 – 7389.

stirred at room temperature for 3 h, and the reaction was quenched by the addition of an aqueous solution of 2N HCl (0.5 mL). The reaction mixture was diluted with EtOAc, and washed with water and brine. The combined organic solution was dried over Na<sub>2</sub>SO<sub>4</sub> and concentrated *in vacuo* to give a crude oil. The crude product was purified by flash column chromatography with 0 to 30 % EtOAc-hexane to afford the inseparable **4** and **16** mixtures as a colorless oil (34.8 mg, 69% yield;  $R_f = 0.47$  in 40% EtOAc-hexane) and **14** as a white solid (4.5 mg, 11% yield;  $R_f = 0.48$  in 40% EtOAc-hexane).

### Preparation of **4** and **16**

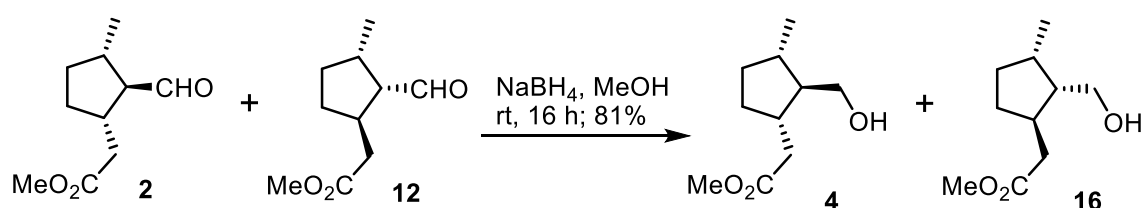

To a stirred solution of the mixture of **2** and **12** (100.0 mg, 0.54 mmol) in MeOH (10 mL) was added NaBH<sub>4</sub> (41.0 mg, 1.08 mmol, 2.0 equiv) at 0 °C. The resulting solution was stirred at room temperature for 3 h until the completion of the reaction, as monitored by TLC. The reaction was further stirred at room temperature for an additional 16 h, but no lactone product was produced, and the reaction was unchanged for a prolonged reaction. The reaction was quenched by the addition of an aqueous solution of 2N HCl (0.5 mL). The reaction mixture was diluted with EtOAc, and washed with water and brine. The combined organic solution was dried over Na<sub>2</sub>SO<sub>4</sub> and concentrated *in vacuo* to give a crude oil. The crude product was purified by flash column chromatography with 0 to 20 % EtOAc-hexane ( $R_f = 0.47$  in 40 % EtOAc-hexane) to afford products of the inseparable **4** and **16** mixtures (82.1 mg, 81% yield) as a colorless oil. The two isomers were unable to be separated by silica gel chromatography.

Selected data for **16** (**16** denoted by an asterisk, identified from the mixture with **4**): <sup>1</sup>H NMR (CDCl<sub>3</sub>, 500 MHz): δ 3.68 (dd,  $J = 11.0, 6.5$  Hz, 1 H\*), 3.655 (s, 3 H), 3.649 (s, 3 H\*), 3.61 (dd,  $J = 11.0, 4.5$  Hz, 1 H), 3.52 (dd,  $J = 11.0, 6.5$  Hz, 1 H), 3.50 (dd,  $J = 11.0, 7.0$  Hz, 1 H\*), 2.45 – 2.40 (m, 1 H\* and 1 H), 2.37 – 2.28 (m, 1 H\* and 1 H), 2.21 – 2.10 (m, 1 H\* and 1 H), 2.00 – 1.65 (m, 4 H\* and 4 H), 1.40 – 1.12 (m, 3 H\* and 3 H), 0.99 (d,  $J = 6.6$  Hz, 3 H), 0.91 (d,  $J = 7.0$  Hz, 3 H\*); <sup>13</sup>C NMR (CDCl<sub>3</sub>, 125 MHz): δ 174.5 (C), 174.3 (C),\* 64.4 (CH<sub>2</sub>), 63.2 (CH<sub>2</sub>),\* 55.8 (CH), 51.62 (CH<sub>3</sub>), 51.56 (CH<sub>3</sub>),\* 50.4 (CH),\* 40.4 (CH<sub>2</sub>),\* 40.0 (CH<sub>2</sub>), 38.6 (CH), 37.4 (CH),\* 37.1 (CH), 35.6 (CH),\* 33.2 (CH<sub>2</sub>),\* 32.9 (CH<sub>2</sub>), 31.3 (CH<sub>2</sub>),\* 31.2 (CH<sub>2</sub>), 20.1 (CH<sub>3</sub>), 15.2 (CH<sub>3</sub>).\*

### Preparation of Lactone **5** and **17**

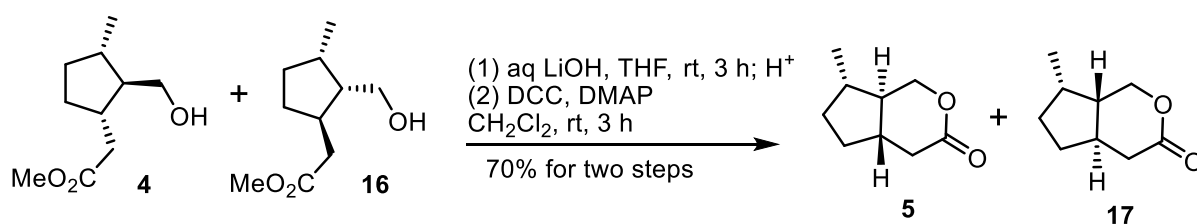

To a solution of the mixture of **4** and **16** (210.0 mg, 1.13 mmol) in THF (4.2 mL) was added an aqueous solution of LiOH (54.3 mg, 2.27 mmol, 2.0 equiv) in water (2.1 mL) at room temperature. The resulting solution was stirred at room temperature for 3 h until the completion of the reaction, as monitored by TLC. The pH of the solution was adjusted to 2-3 by adding 2M aqueous HCl at 0 °C. The reaction mixture was diluted and extracted with EtOAc. The solution was washed with water and brine. The combined organic solution was dried over Na<sub>2</sub>SO<sub>4</sub> and concentrated *in vacuo* to give the crude product as an oil. This residue was proceeded to the next step without further purification.

To a solution of the above crude product in dry CH<sub>2</sub>Cl<sub>2</sub> (21 mL) was added DCC (233.9 mg, 1.13 mmol, 1.0 equiv) and DMAP (27.2 mg, 0.20 mmol, 0.2 equiv) at room temperature. The resulting solution was stirred at room temperature for 3 h until the completion of the reaction, as monitored by TLC. The reaction mixture was diluted with EtOAc, followed by washing with brine and water. The combined organic solution was dried over Na<sub>2</sub>SO<sub>4</sub> and concentrated *in vacuo* to give a crude oil. The crude product was purified by flash column chromatography with 10-15 % EtOAc-hexane (*R<sub>f</sub>* = 0.48 in 40% EtOAc-hexane) to afford the mixture of products **5** and **17** (121.2 mg, 70% yield) as a colorless oil.

Selected data for **17** (**17** denoted by an asterisk, identified from the mixture with **5**): <sup>1</sup>H NMR (CDCl<sub>3</sub>, 500 MHz): δ 4.55 (dd, *J* = 10.5, 5.0 Hz, 1 H), 4.51 (dd, *J* = 10.5, 5.0 Hz, 1 H\*), 4.21 (dd, *J* = 12.0, 10.5 Hz, 1 H\*), 4.05 (dd, *J* = 11.7, 10.5 Hz, 1 H), 2.90 (dd, *J* = 17.8, 5.0 Hz, 1 H\*), 2.84 (dd, *J* = 17.7, 5.0 Hz, 1 H), 2.39 – 1.61 (m, 5 H and 5 H\*), 1.47 – 1.08 (m, 3 H and 3 H\*), 1.03 (d, *J* = 6.6 Hz, 3 H), 0.84 (d, *J* = 7.3 Hz, 3 H\*); <sup>13</sup>C NMR (CDCl<sub>3</sub>, 125 MHz): δ 170.5 (C and C\*), 74.3 (CH<sub>2</sub>), 72.3 (CH<sub>2</sub>),\* 48.6 (CH), 44.0 (CH),\* 41.5 (CH), 38.2 (CH<sub>2</sub>),\* 38.1 (CH<sub>2</sub>), 37.6 (CH),\* 36.0 (CH), 33.7(CH<sub>2</sub>),\* 33.0 (CH<sub>2</sub>), 31.9 (CH),\* 31.2 (CH<sub>2</sub>),\* 29.7 (CH<sub>2</sub>), 19.1 (CH<sub>3</sub>), 17.3 (CH<sub>3</sub>).\*

### Preparation of (-)-isoiridomyrmecin **15**

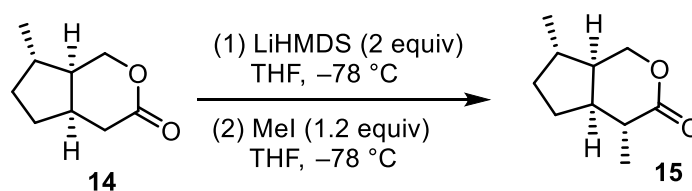

To a solution of **14** (20.0 mg, 0.13 mmol) in dry THF (1.6 mL) was added lithium bis(trimethylsilyl)amide (0.26 mL, 1.0 M in THF, 0.26 mmol, 2.0 equiv) at  $-78\text{ }^{\circ}\text{C}$ . The resulting solution was stirred at  $-78\text{ }^{\circ}\text{C}$  for 30 min, followed by the addition of iodomethane (10  $\mu\text{L}$ , 0.16 mmol, 1.2 equiv), and the solution was stirred at  $-78\text{ }^{\circ}\text{C}$  for 30 min. The reaction was quenched by the addition of an aqueous saturated solution of  $\text{NH}_4\text{Cl}$  (5 mL), and the solution was gradually warmed up to room temperature. The resulting mixture was extracted with EtOAc, washed with brine, and the combined organic solution was dried over  $\text{MgSO}_4$  and concentrated *in vacuo* to give a crude oil. The crude product was purified by flash column chromatography with 0 to 10 % EtOAc-hexane to afford product isoiridomyrmecin (**15**,  $R_f = 0.52$  in 30% in EtOAc-hexane, 16.1 mg, 74% yield) as a white solid.

Selected data for **15**: mp.  $53\text{--}54\text{ }^{\circ}\text{C}$ ;  $[\alpha]_{\text{D}}^{23} -57.4$  ( $c$  0.8,  $\text{CHCl}_3$ );  $^1\text{H NMR}$  ( $\text{CDCl}_3$ , 500 MHz):  $\delta$  4.36 – 4.30 (m, 1 H), 3.93 (t,  $J = 11.2$  Hz, 1 H), 2.34 – 2.24 (m, 1 H), 2.14 – 2.07 (m, 1 H), 2.06 – 1.96 (m, 2 H), 1.91 – 1.83 (m, 1 H), 1.68 – 1.59 (m, 1 H), 1.36 – 1.23 (m, 2 H), 1.18 (d,  $J = 6.6$  Hz, 3 H), 1.03 (d,  $J = 6.6$  Hz, 3 H);  $^{13}\text{C NMR}$  ( $\text{CDCl}_3$ , 125 MHz):  $\delta$  176.4 (C), 69.4 ( $\text{CH}_2$ ), 45.3 (CH), 43.1 (CH), 39.1 (CH), 38.3 (CH), 35.7 ( $\text{CH}_2$ ), 33.1 ( $\text{CH}_2$ ), 19.1 ( $\text{CH}_3$ ), 13.9 ( $\text{CH}_3$ );<sup>4</sup> HRMS (HPLC-ESI-TOF)  $m/z$ :  $[\text{M}+\text{Na}]^+$  Calcd for  $\text{C}_{10}\text{H}_{16}\text{NaO}_2$ : 191.10480; found: 191.10483.

### Preparation of **6**, **7**, **18**, and **19** with LiHMDS:

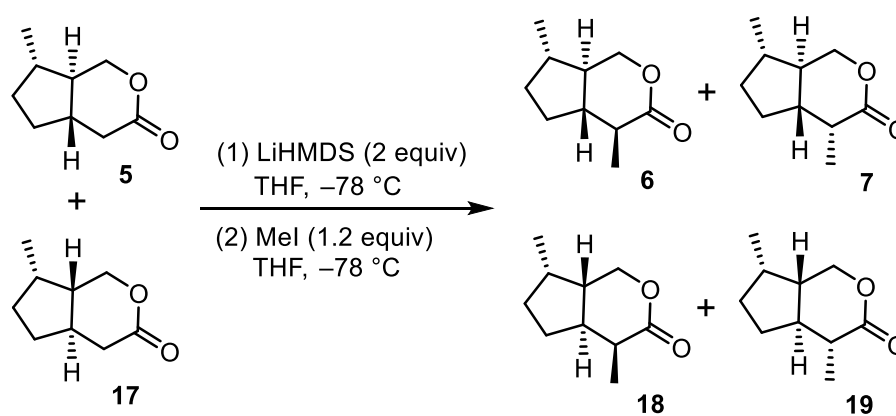

To a solution of **5** and **17** mixtures (110.0 mg, 0.71 mmol) in dry THF (8.9 mL) was added lithium bis(trimethylsilyl)amide (1.42 mL, 1.0 M in THF, 1.42 mmol, 2.0 equiv) at  $-78$



°C. The resulting solution was stirred at  $-78$  °C for 30 min, followed by the addition of iodomethane (55  $\mu$ L, 0.88 mmol, 1.2 equiv), and the solution was stirred at  $-78$  °C for 30 min. The reaction was quenched by the addition of an aqueous saturated solution of  $\text{NH}_4\text{Cl}$  (20 mL), and the solution was gradually warmed up to room temperature. The resulting mixture was extracted with EtOAc, washed with brine, and the combined organic solution was dried over  $\text{MgSO}_4$  and concentrated *in vacuo* to give a crude oil. The crude product was purified by flash column chromatography with 10 to 25 % EtOAc-hexane to afford the product mixtures of **6**, **7**, **18**, and **19** in several fractions ( $R_f = 0.50-0.52$  in 30% in EtOA–hexane, total collecting weight: 80.5 mg; 67% yield). The properties of these isomers are very similar and individual pure substances cannot be completely separated from the mixture of these isomers. However, in addition to compounds **6** and **7**, compounds **18** and **19** can also be identified from some fractions, where the  $^{13}\text{C}$  NMR chemical shift values were in good agreement with the literature data.<sup>4</sup>

Select data from the spectra of isomers: For **18** (iridomyrmecin C'):  $^{13}\text{C}$  NMR ( $\text{CDCl}_3$ , 125 MHz):  $\delta$  175.0, 72.4, 41.0, 38.9, 37.3, 34.1, 31.8, 26.1, 17.1, 13.2. For **19** (iridomyrmecin D'):  $^{13}\text{C}$  NMR ( $\text{CDCl}_3$ , 125 MHz): 173.9, 72.2, 44.5, 44.4, 44.1, 33.7, 32.6, 30.3, 17.2, 15.7.<sup>6</sup>

---

<sup>6</sup> Ref. 4; lit. data, for **18** (iridomyrmecin C):  $^{13}\text{C}$  NMR ( $\text{CDCl}_3$ , 125 MHz):  $\delta$  175.1, 72.5, 41.0, 38.9, 37.3, 34.1, 31.8, 26.1, 17.1, 13.2. For **19** (iridomyrmecin D):  $^{13}\text{C}$  NMR ( $\text{CDCl}_3$ , 125 MHz):  $\delta$  174.0, 72.2, 44.6, 44.5, 44.2, 33.7, 32.6, 30.3, 17.2, 15.7.

Sample Name **PDC-02-374-f1**  
Date collected **2015-12-07**

Pulse sequence **PROTON**  
Solvent **cdcl3**

Temperature **20**  
Spectrometer **Agilent-NMR-inova500**

Study owner **vnmr2**  
Operator **vnmr2**

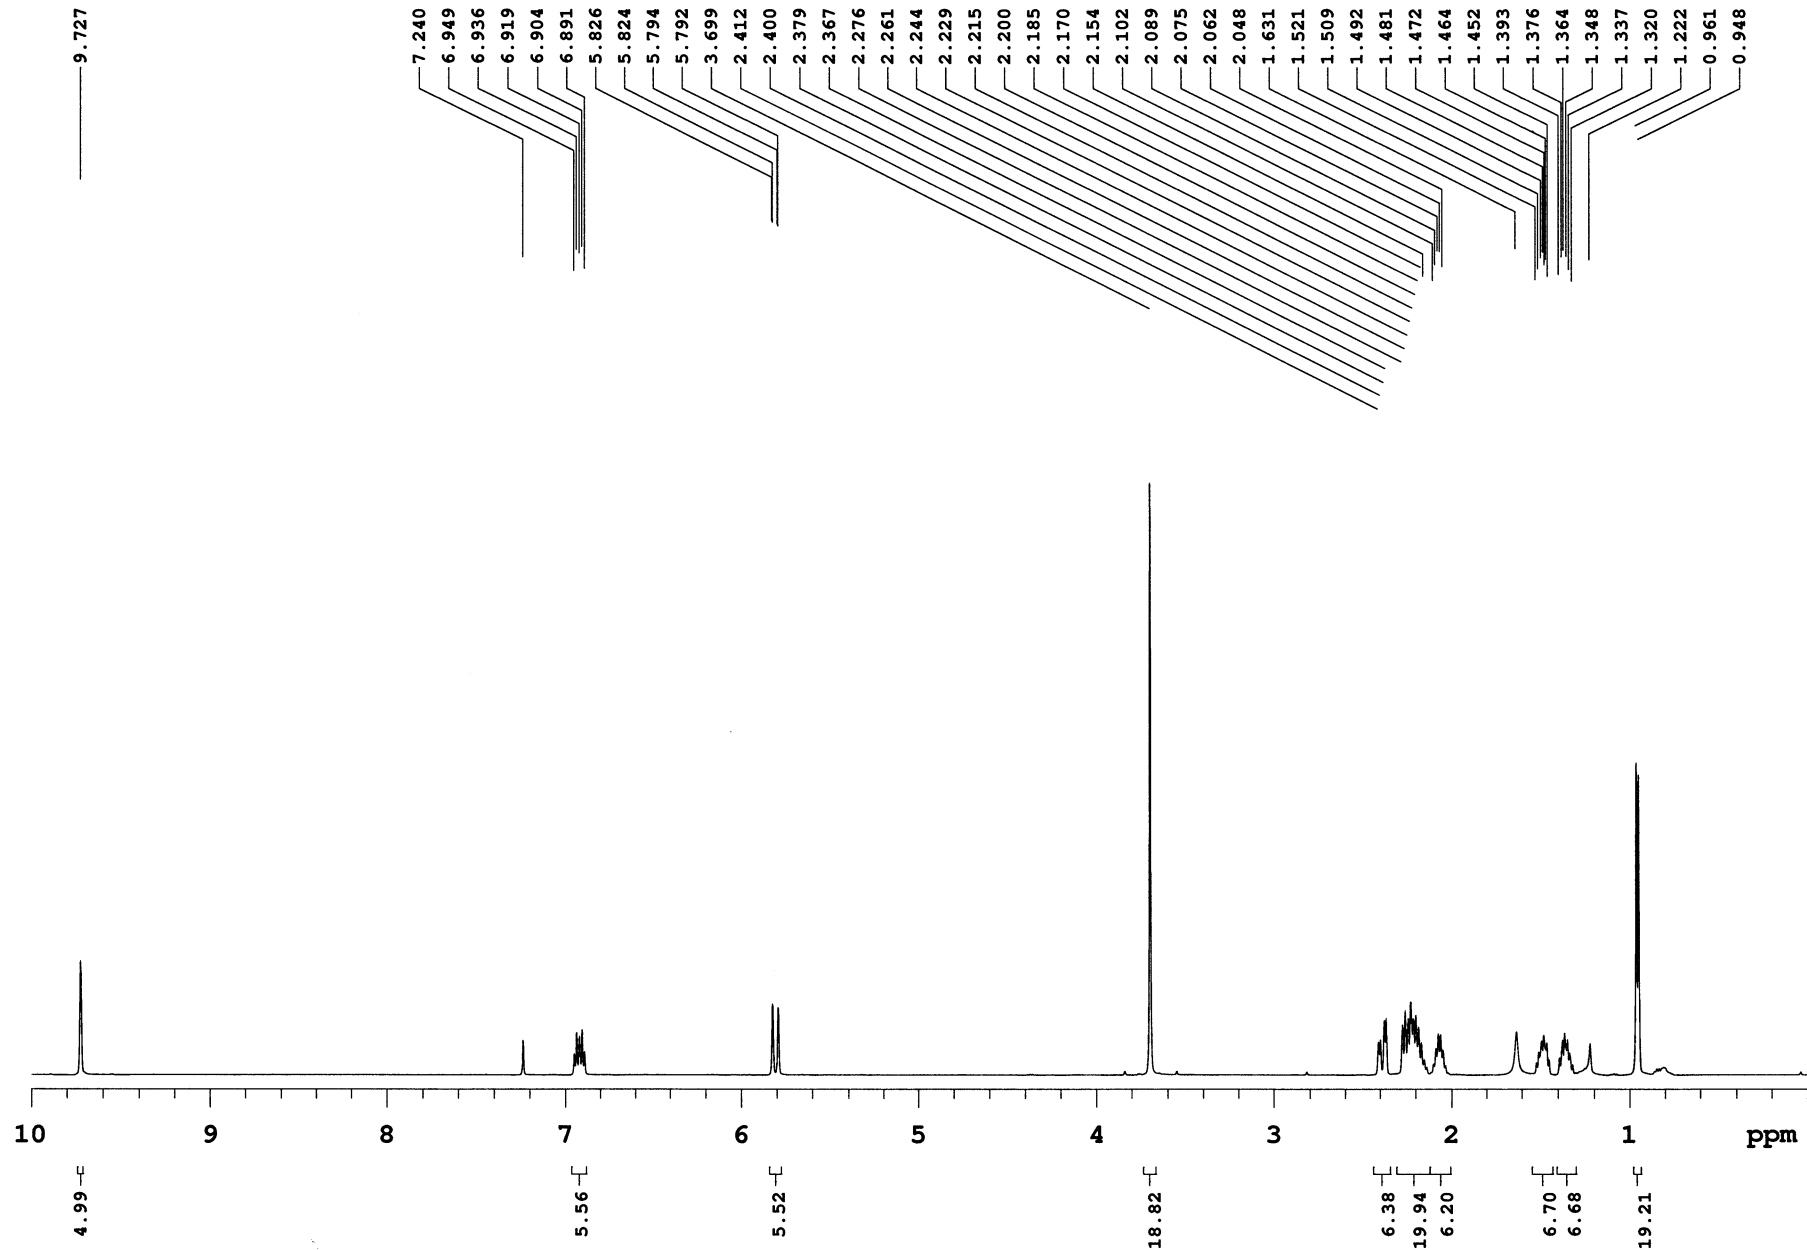

Sample Name **PDC-02-374-f1**  
Date collected **2015-12-07**

Pulse sequence **CARBON**  
Solvent **cdcl3**

Temperature **20**  
Spectrometer **Agilent-NMR-inova500**

Study owner **vnmr2**  
Operator **vnmr2**

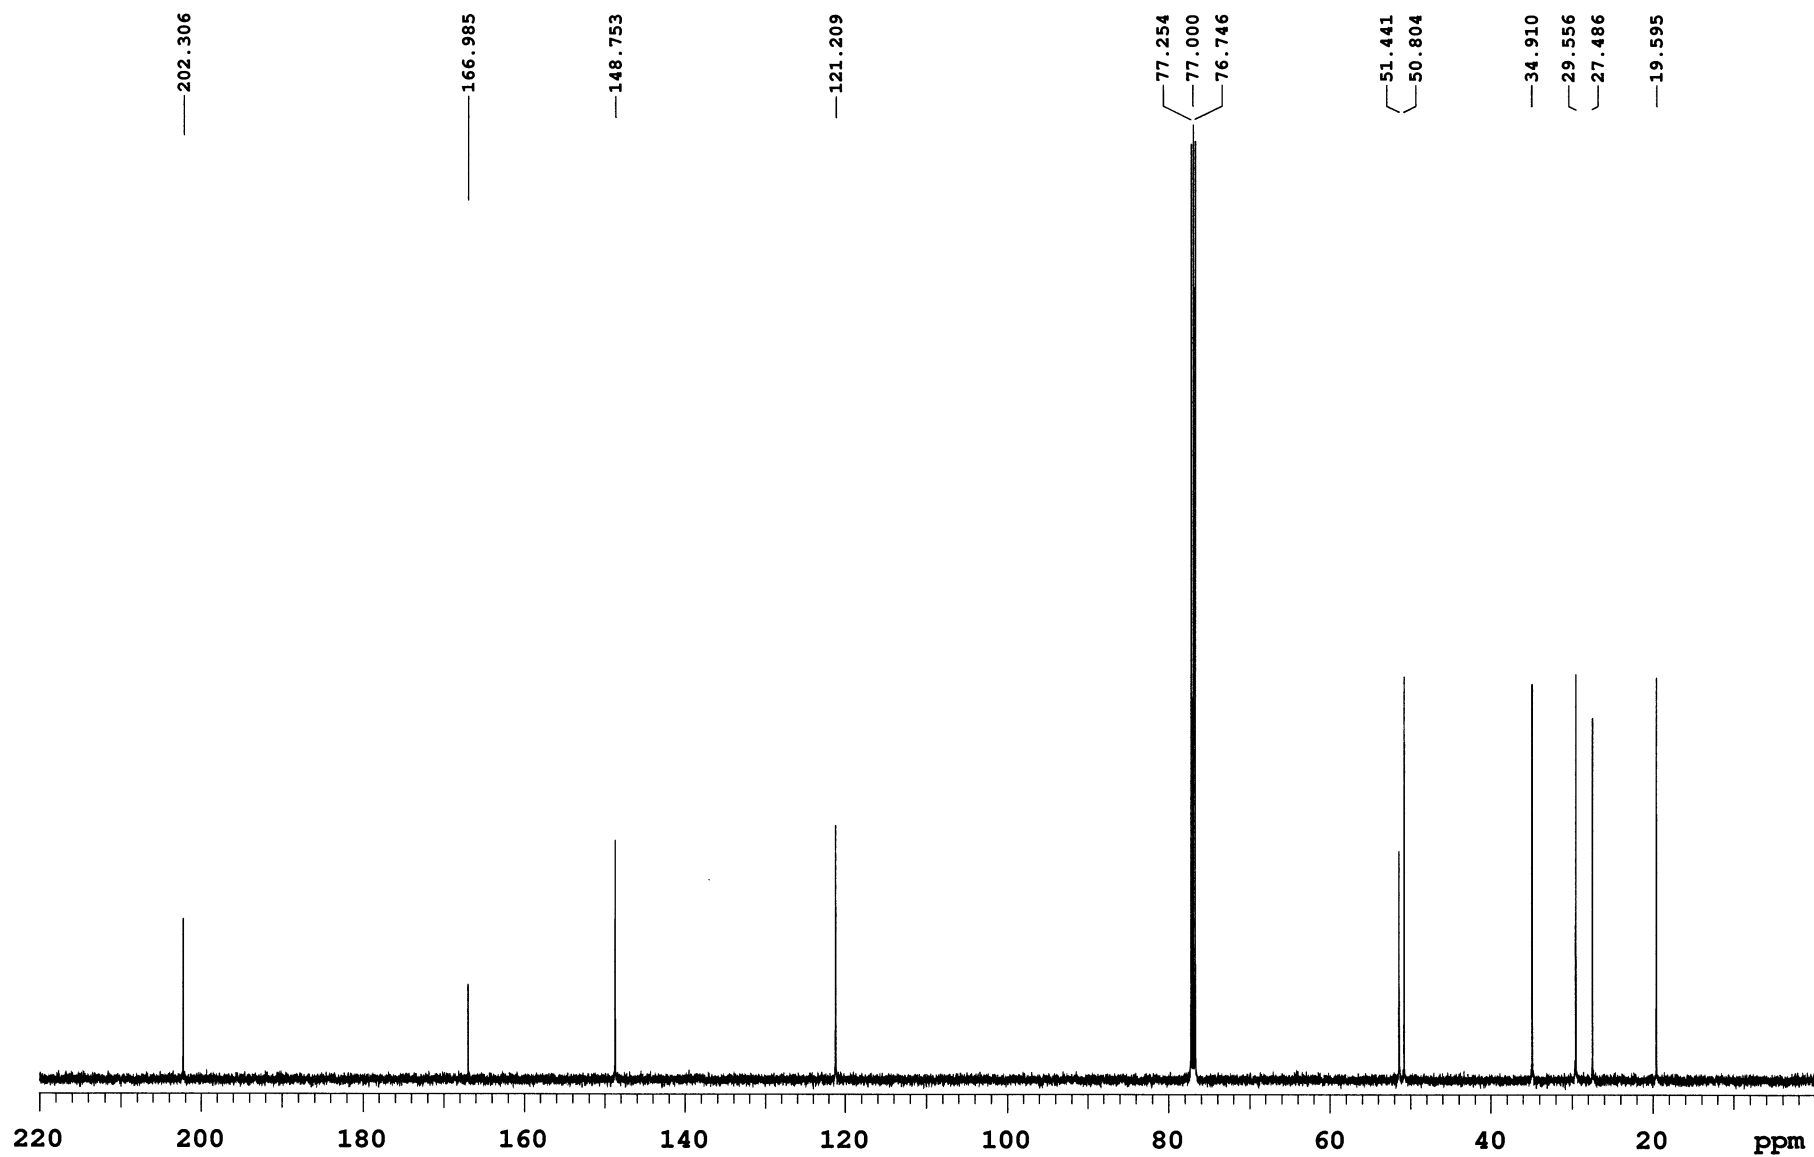

$^{13}\text{C}$  NMR (125 MHz,  $\text{CDCl}_3$ ) of compound 1

Sample Name **PDC-02-374-f1**  
Date collected **2015-12-07**

Pulse sequence **DEPT**  
Solvent **cdcl3**

Temperature **20**  
Spectrometer **Agilent-NMR-inova500**

Study owner **vnmr2**  
Operator **vnmr2**

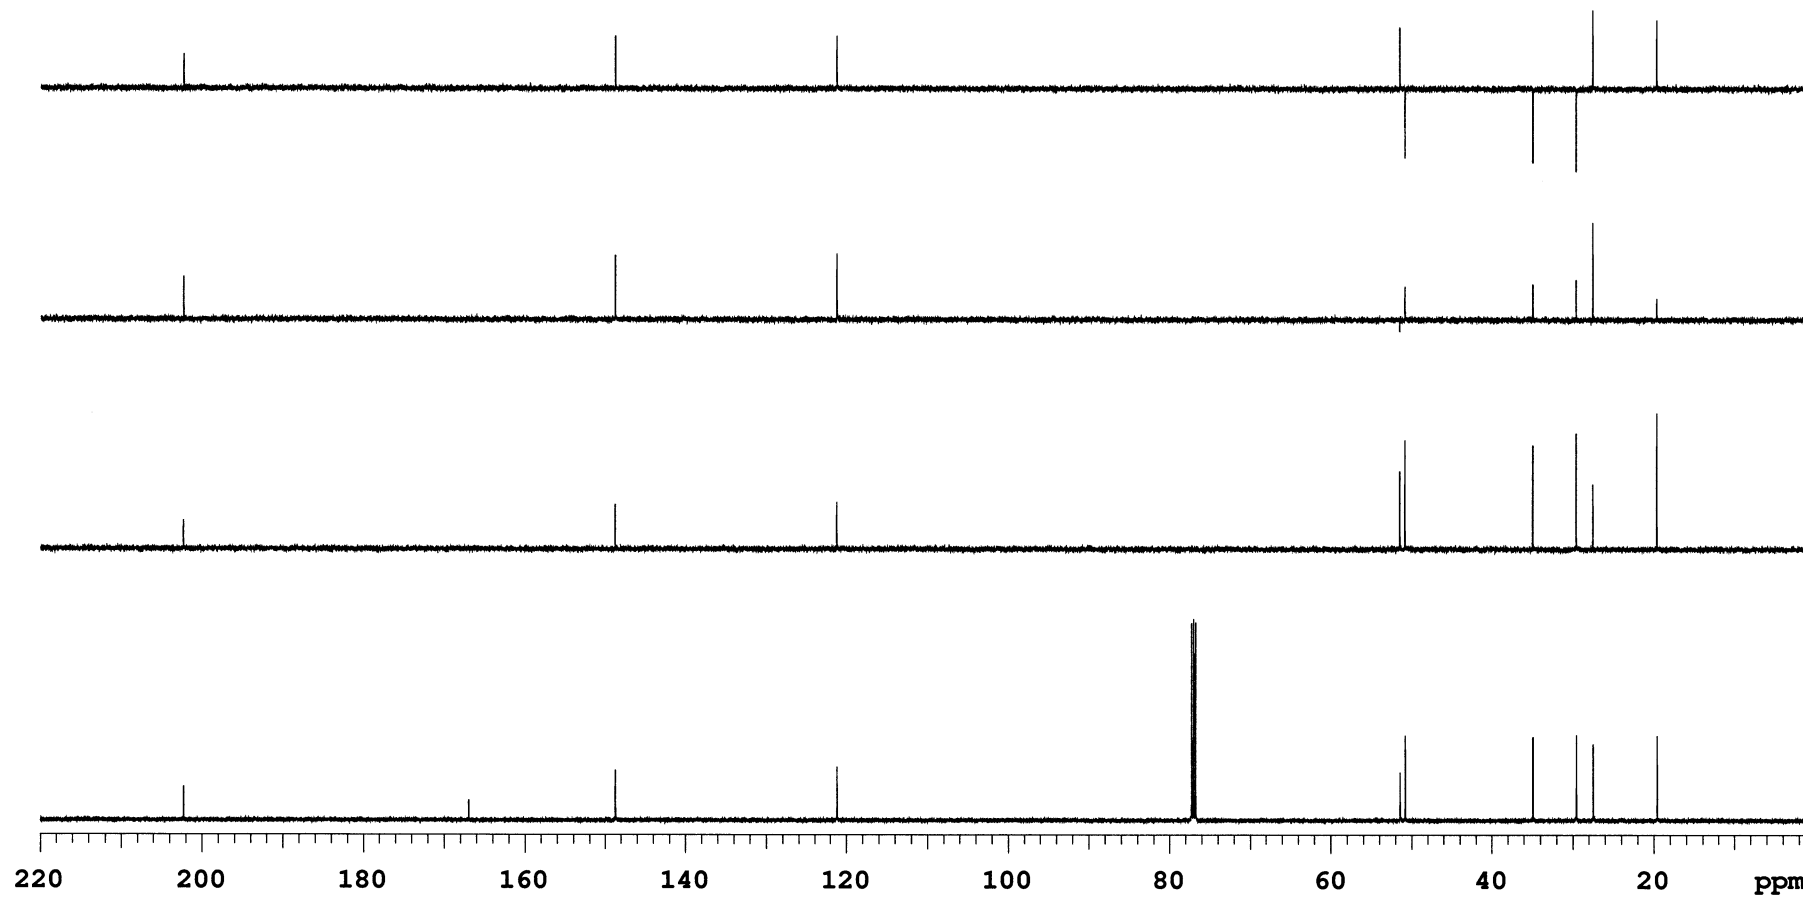

DEPT of compound 1

Sample Name **PDC-02-428-f2**  
Date collected **2016-04-07**

Pulse sequence **PROTON**  
Solvent **cdcl3**

Temperature **25**  
Spectrometer **Agilent-NMR-inova500**

Study owner **vnmr2**  
Operator **vnmr2**

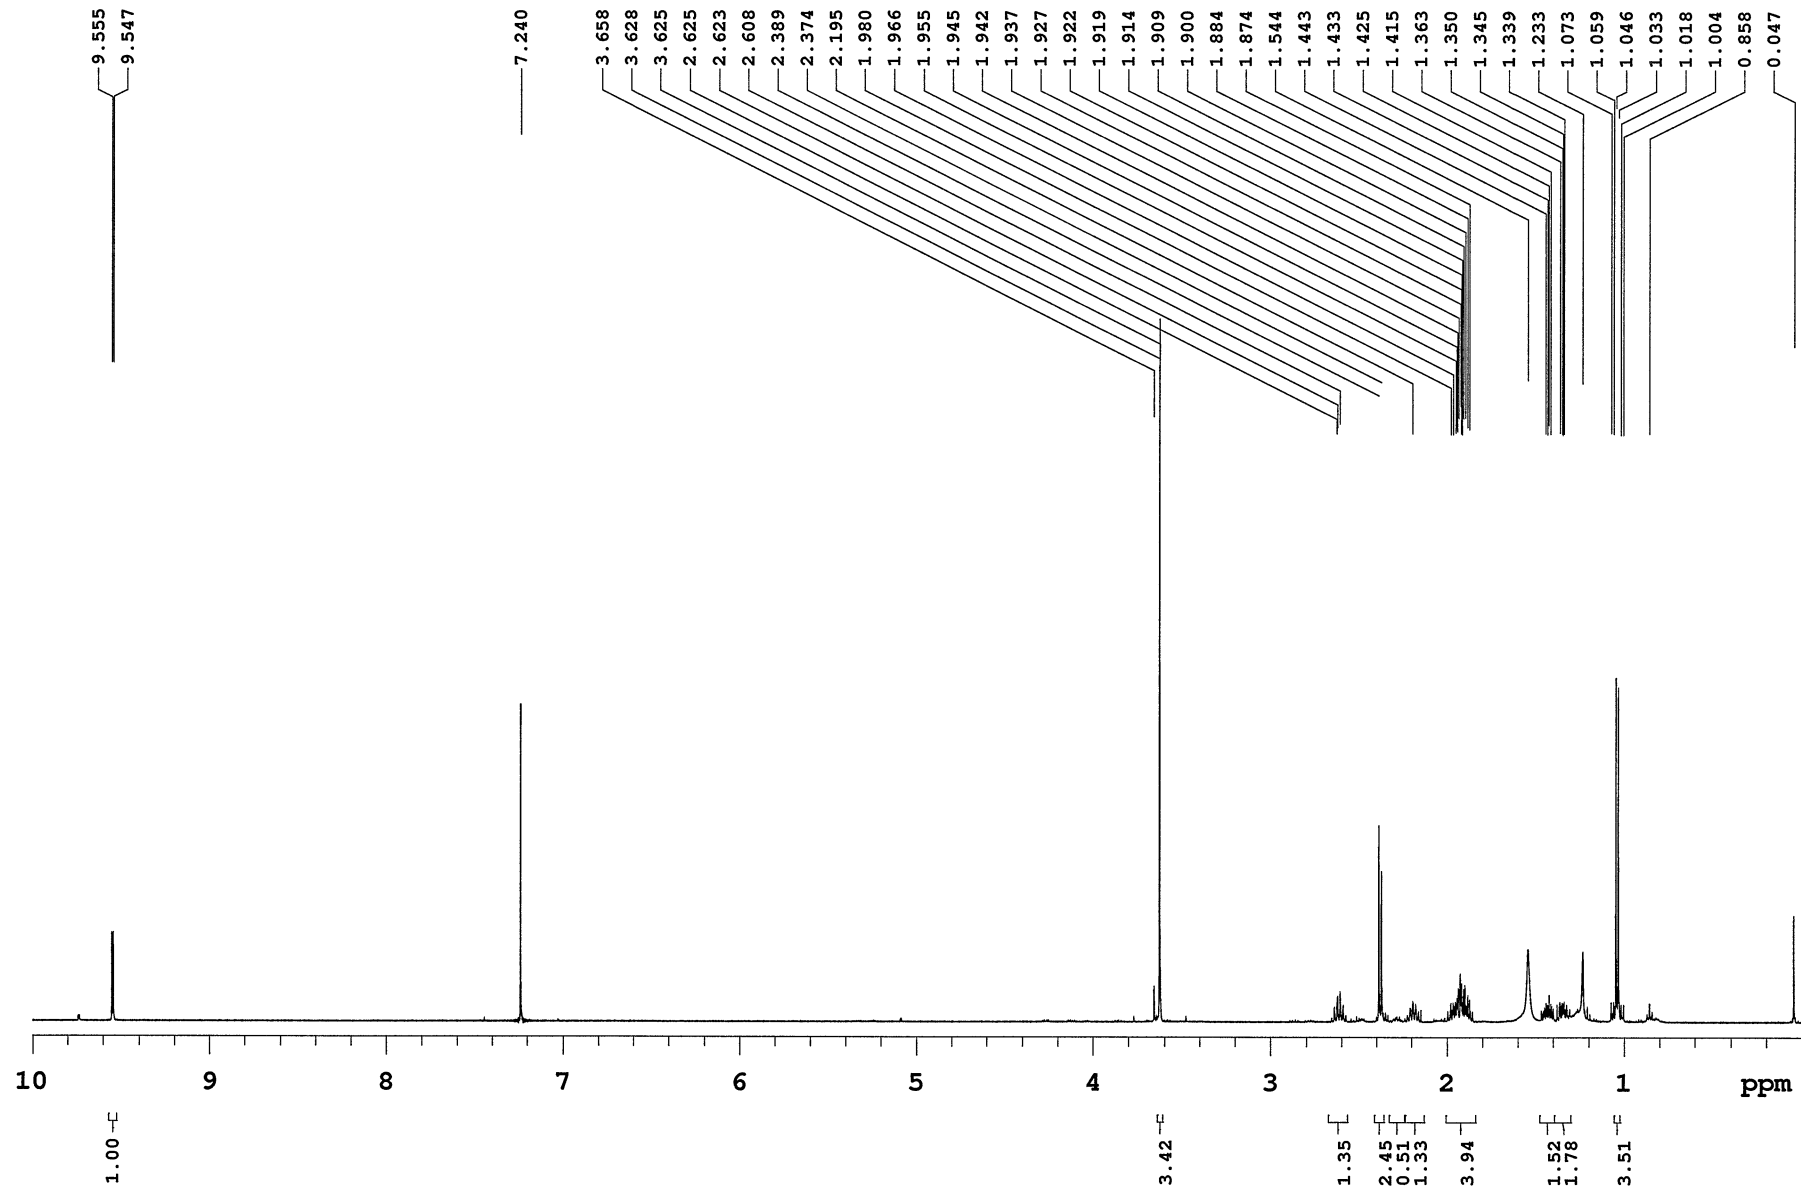

Sample Name **PDC-02-428-f2**  
Date collected **2016-04-07**

Pulse sequence **CARBON**  
Solvent **cdcl3**

Temperature **25**  
Spectrometer **Agilent-NMR-inova500**

Study owner **vnmr2**  
Operator **vnmr2**

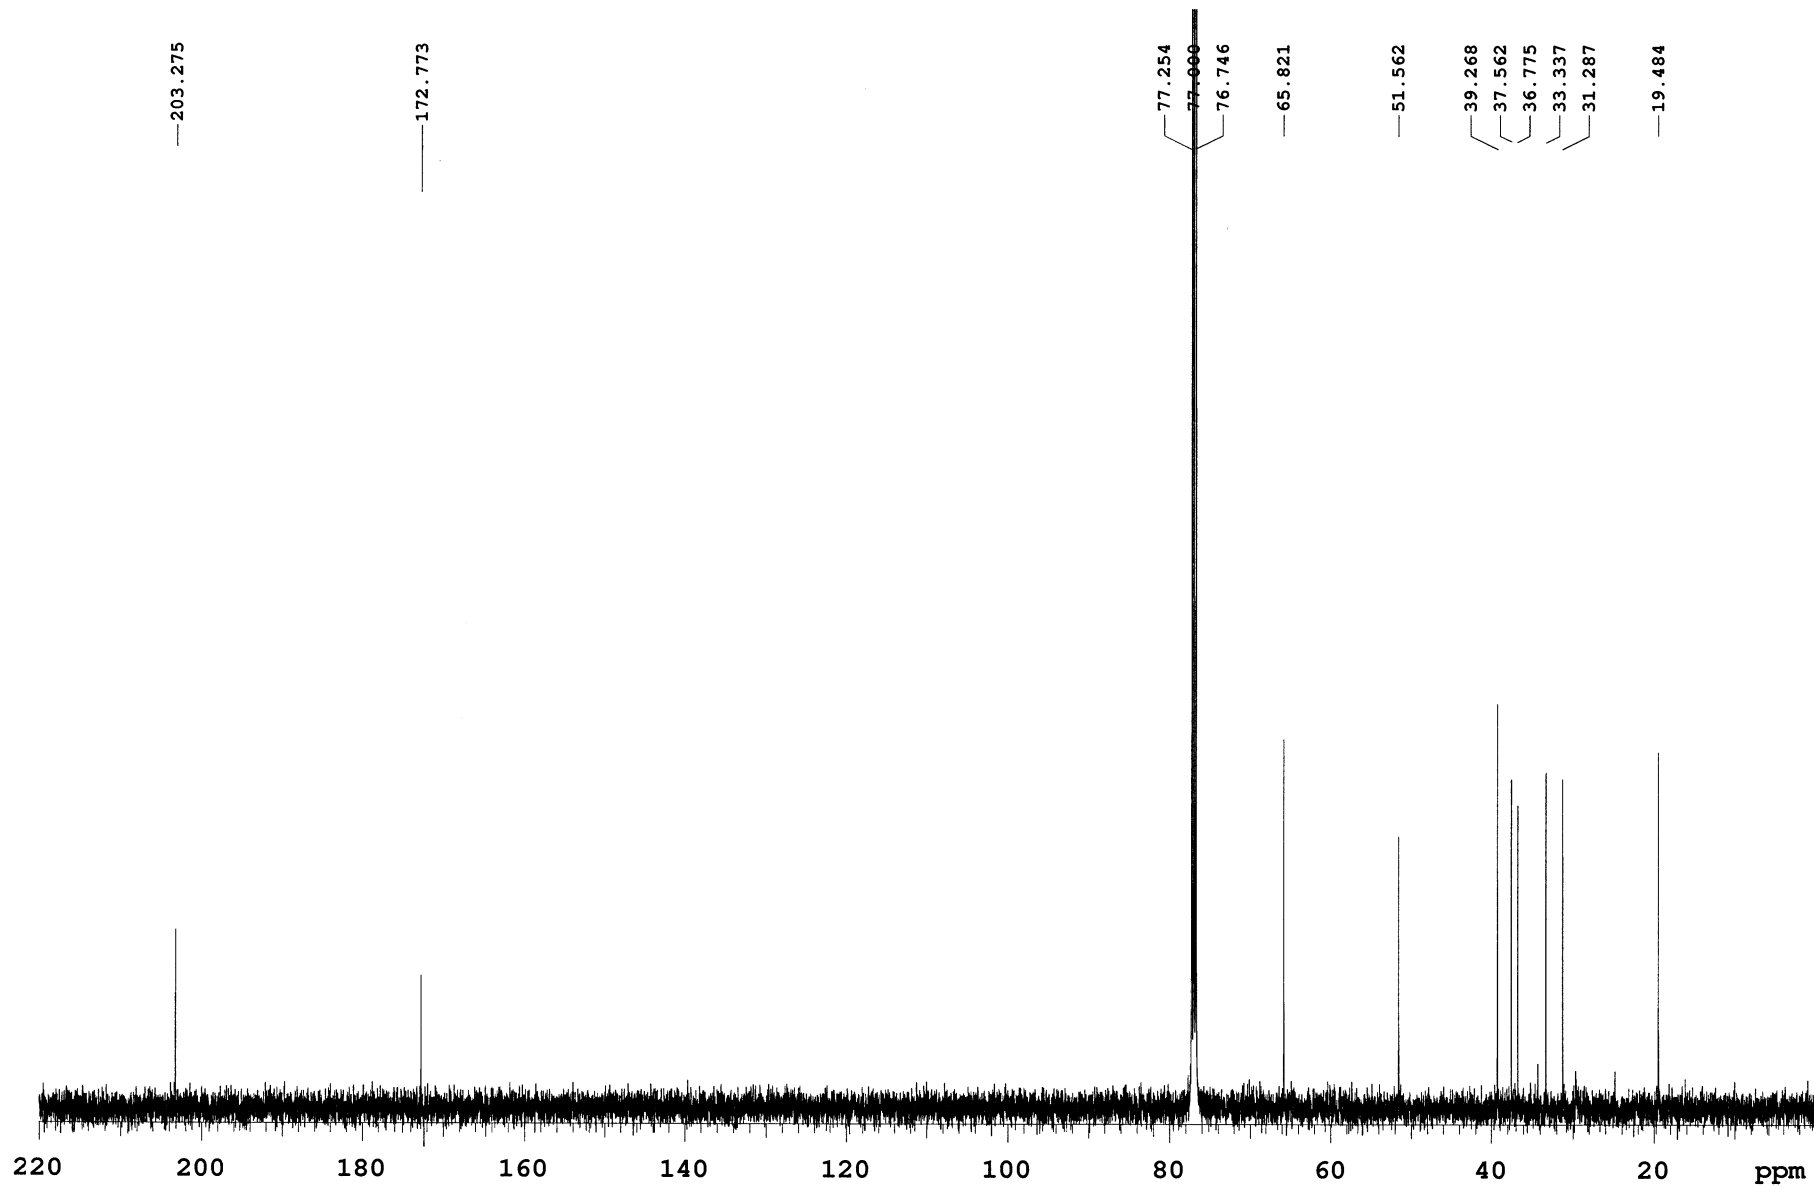

$^{13}\text{C}$  NMR (125 MHz,  $\text{CDCl}_3$ ) of compound 2

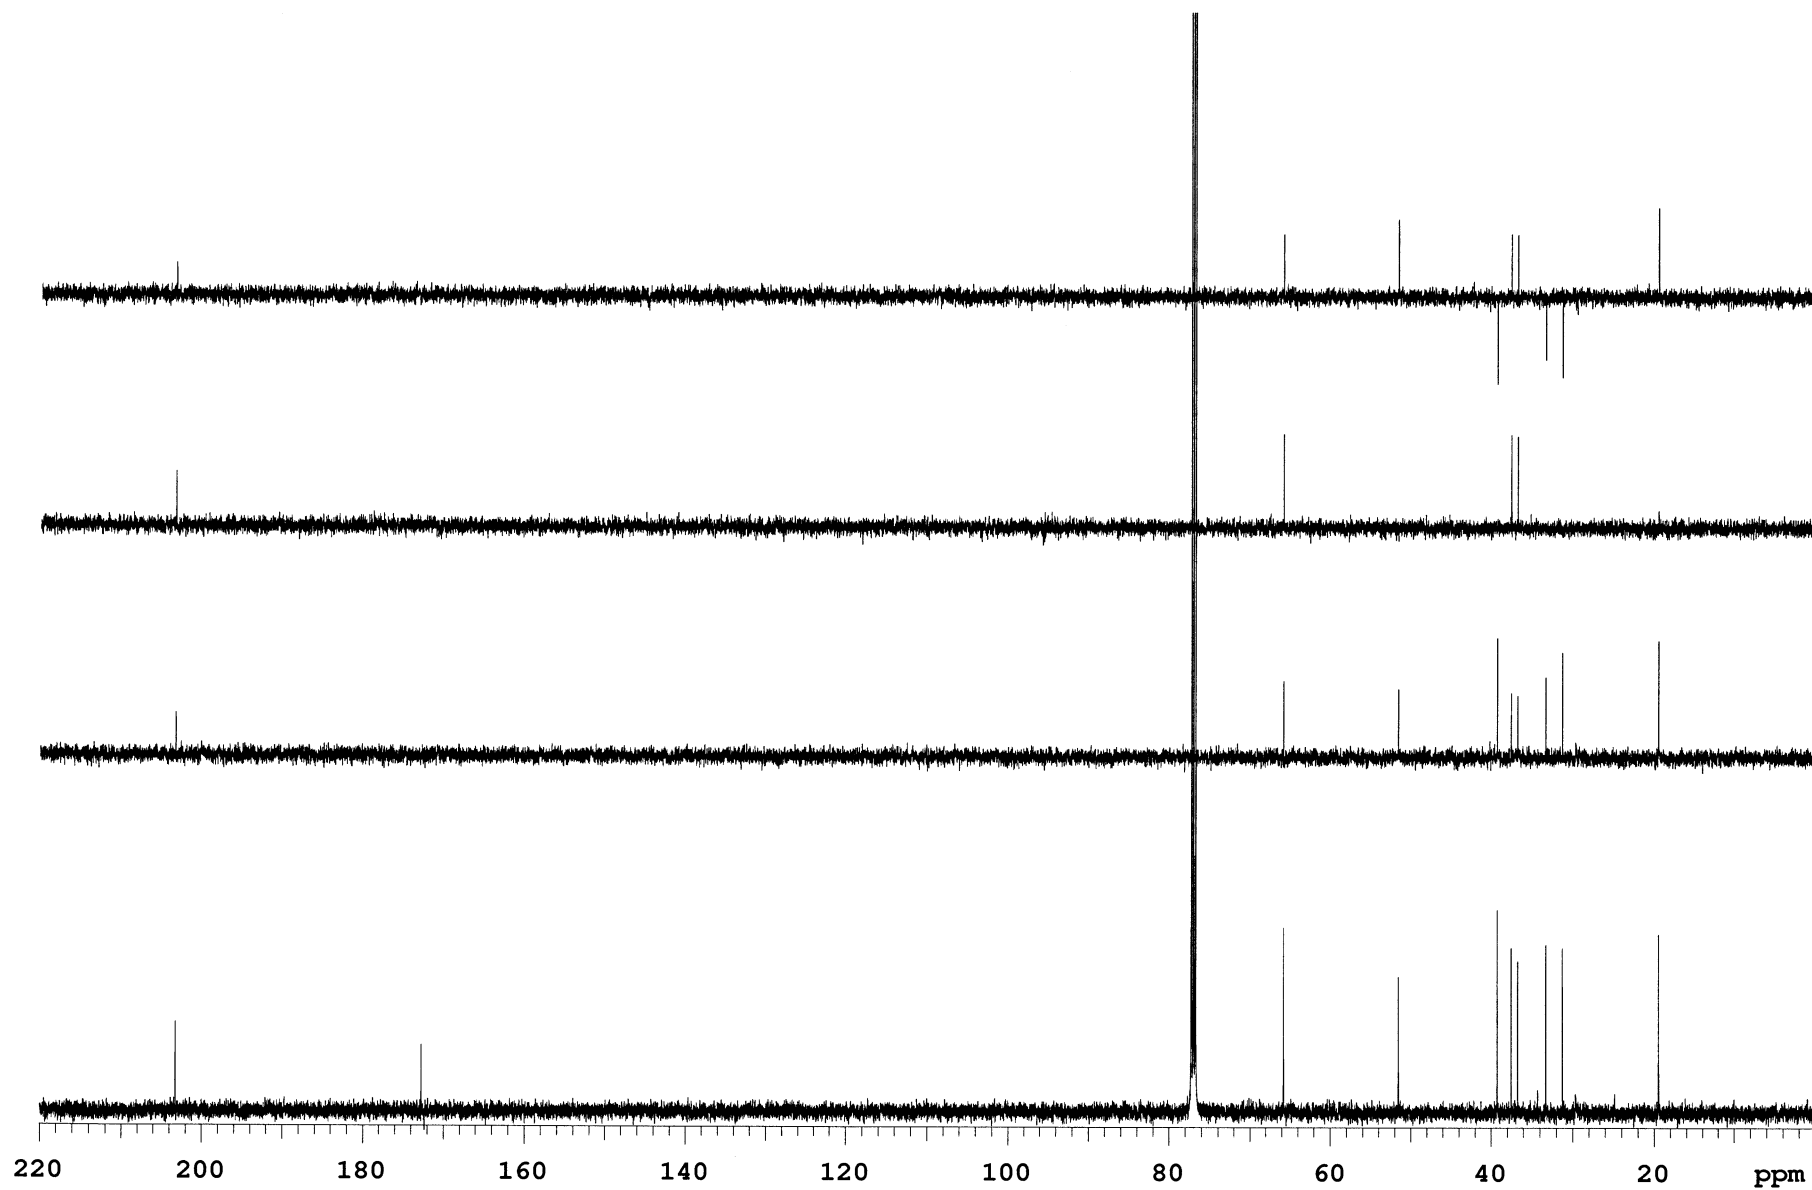

DEPT of compound 2

Sample Name **PDC-02-428-F2-2D**  
Date collected **2016-04-09**

Pulse sequence **gHSQC**  
Solvent **cdcl3**

Temperature **25**  
Spectrometer **Agilent-NMR-inova500**

Study owner **vnmr2**  
Operator **vnmr2**

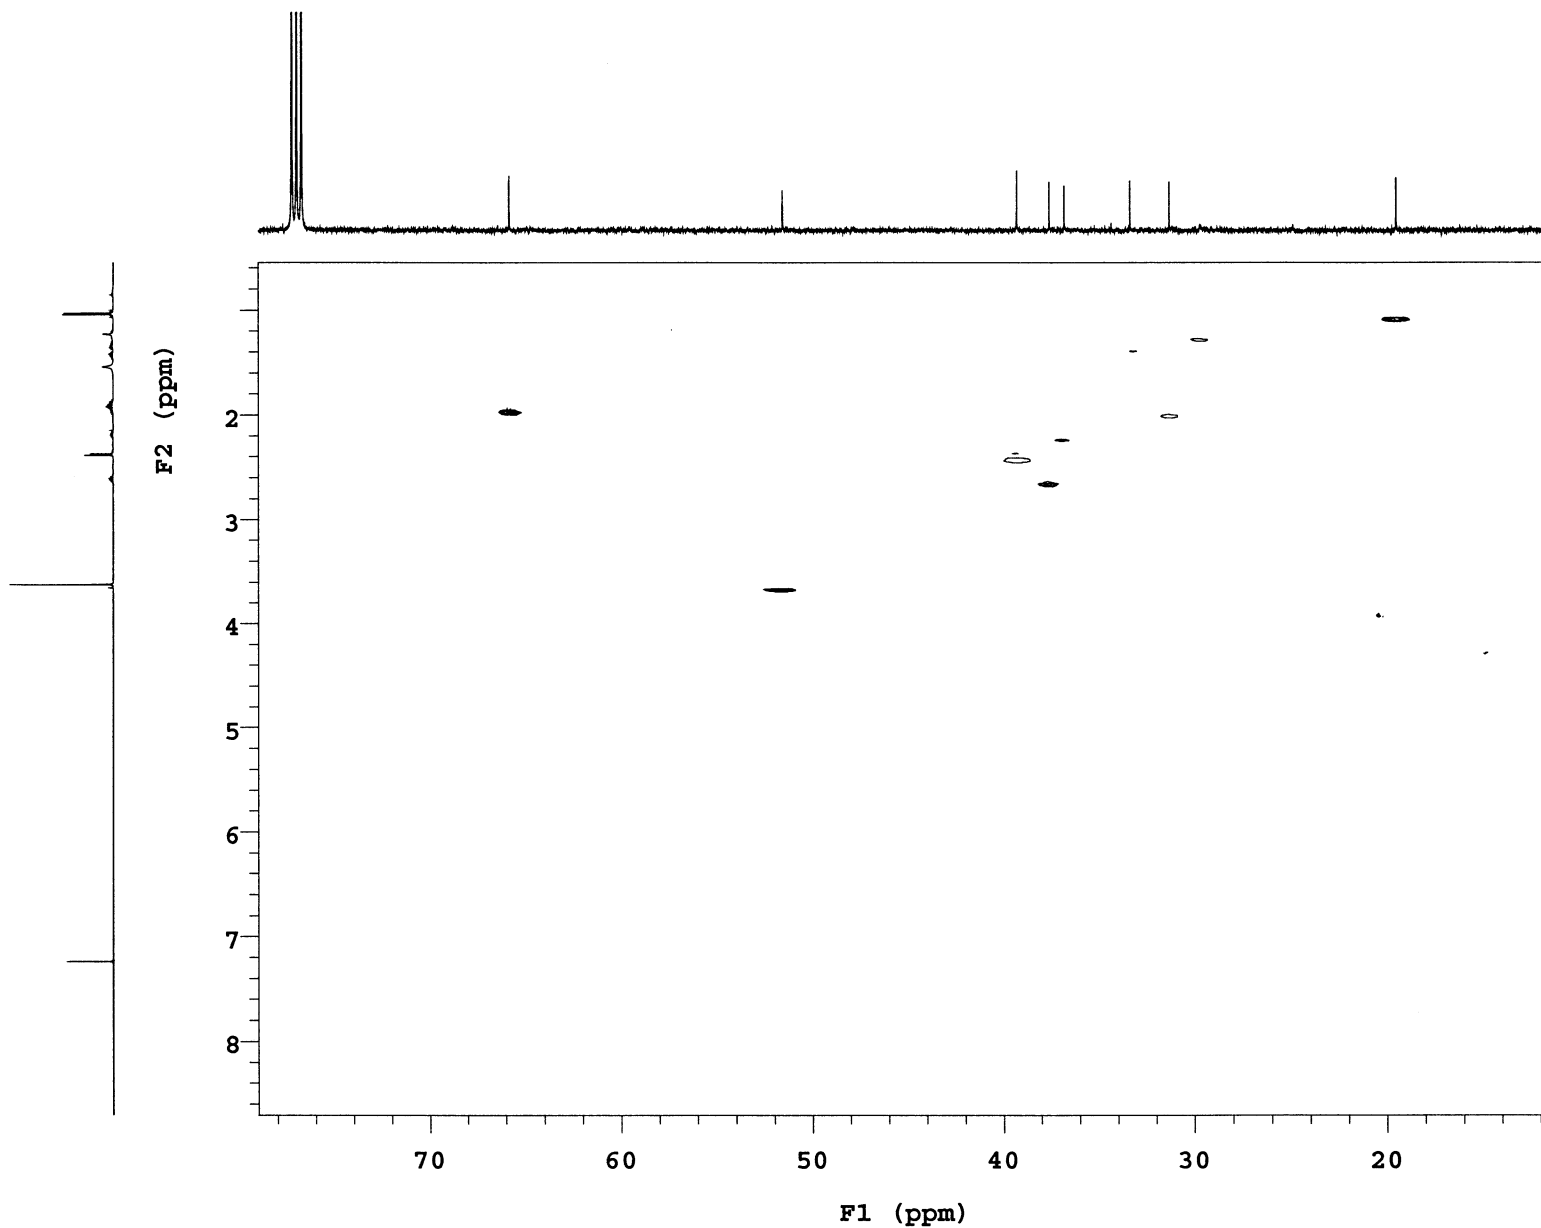



Sample Name **PDC-02-428-F2-2D**  
Date collected **2016-04-08**

Pulse sequence **gCOSY**  
Solvent **cdcl3**

Temperature **25**  
Spectrometer **Agilent-NMR-inova500**

Study owner **vnmr2**  
Operator **vnmr2**

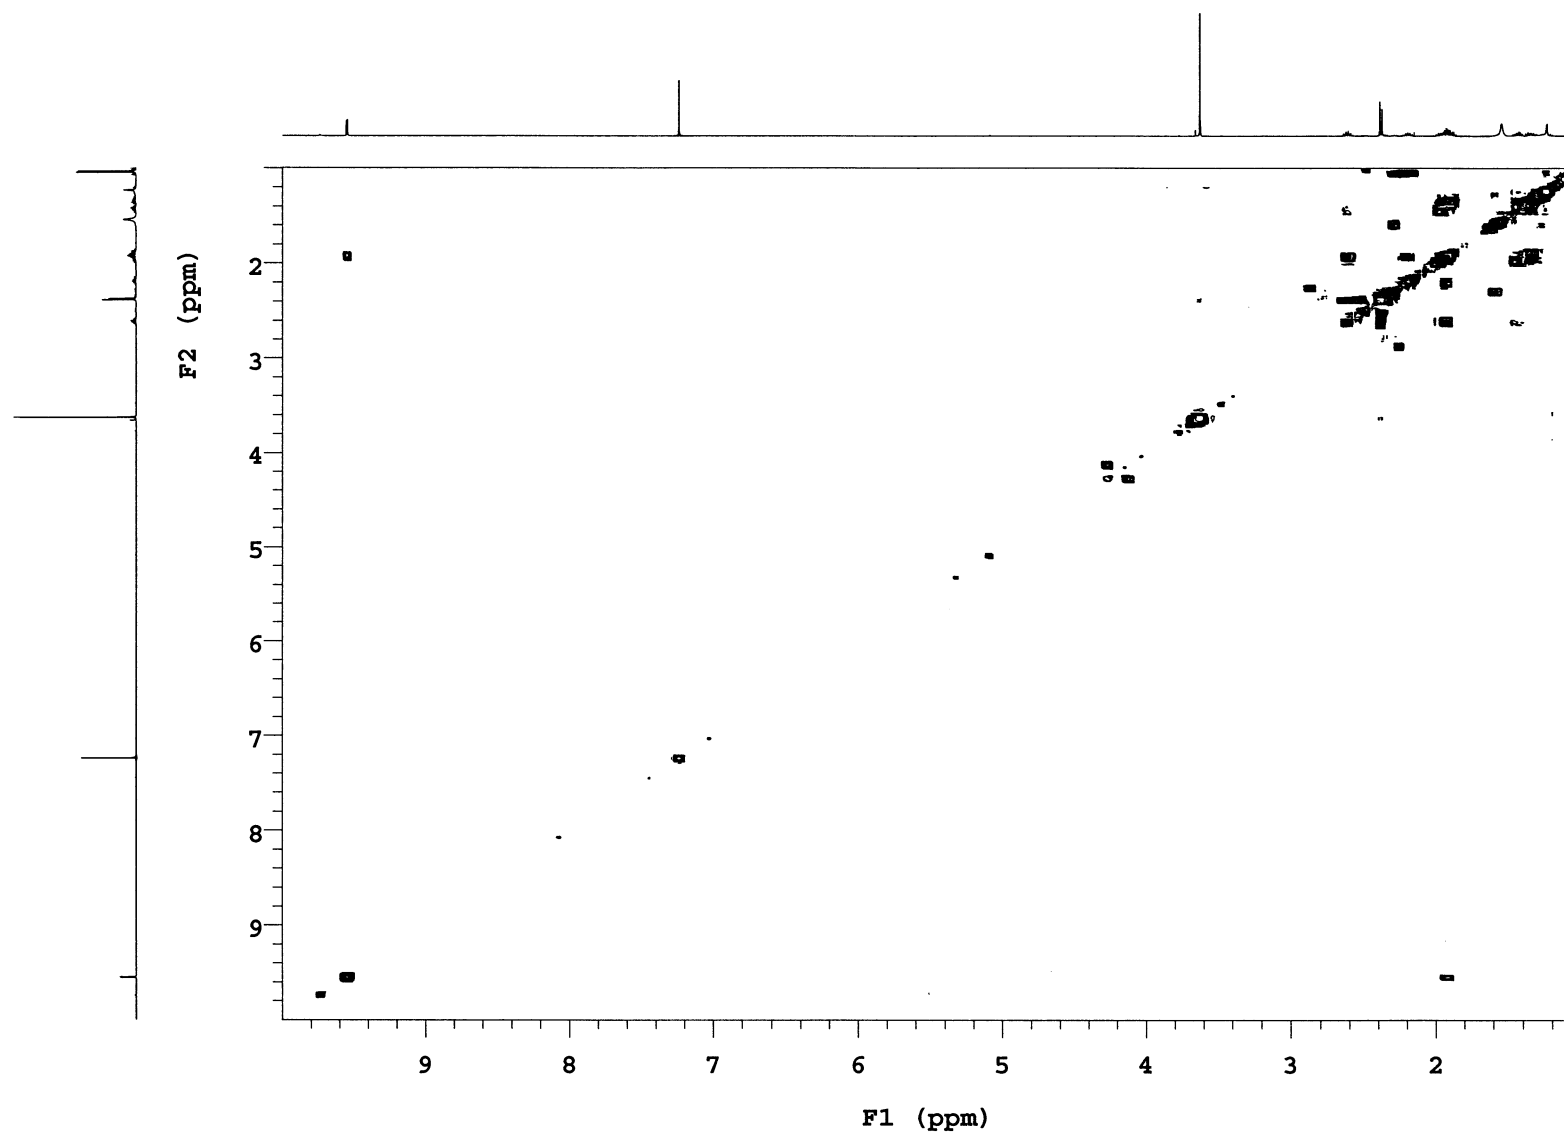

COSY of compound 2

Sample Name **PDC-02-428-F2-2D**  
Date collected **2016-04-09**

Pulse sequence **NOESY**  
Solvent **cdcl3**

Temperature **25**  
Spectrometer **Agilent-NMR-inova500**

Study owner **vnmr2**  
Operator **vnmr2**

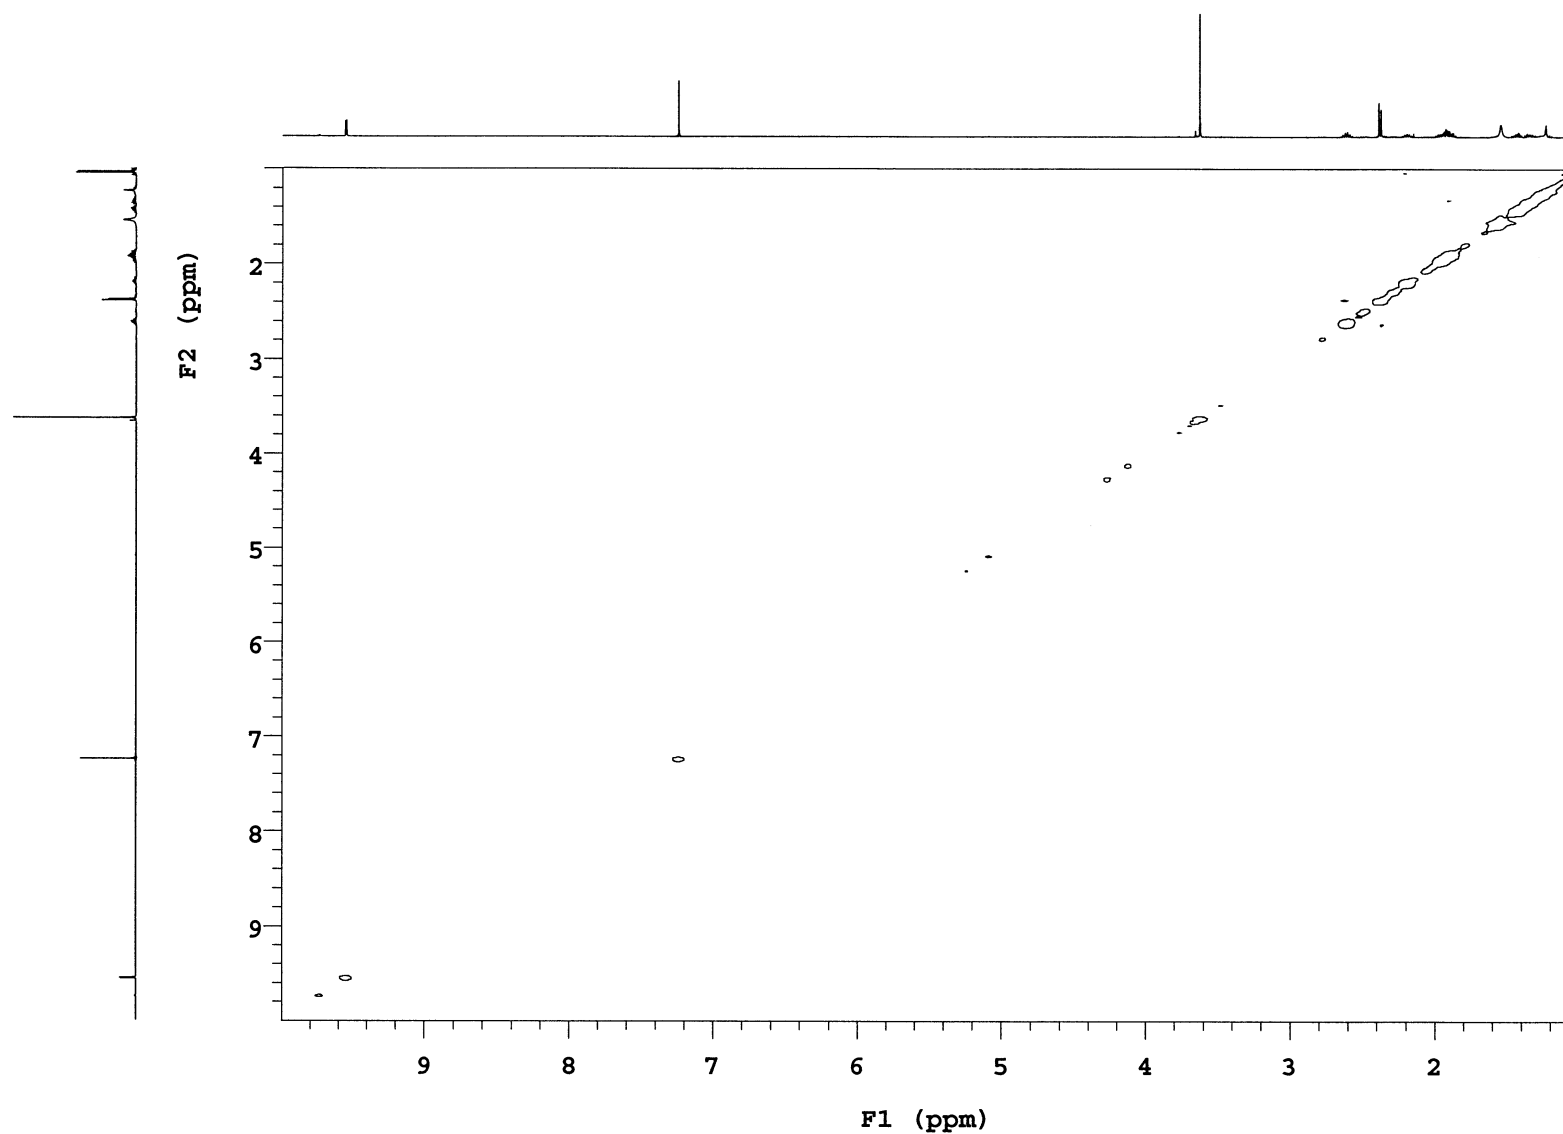

NOESY of compound 2

## 1H NMR (400 MHz, CDCl3) of compound 3

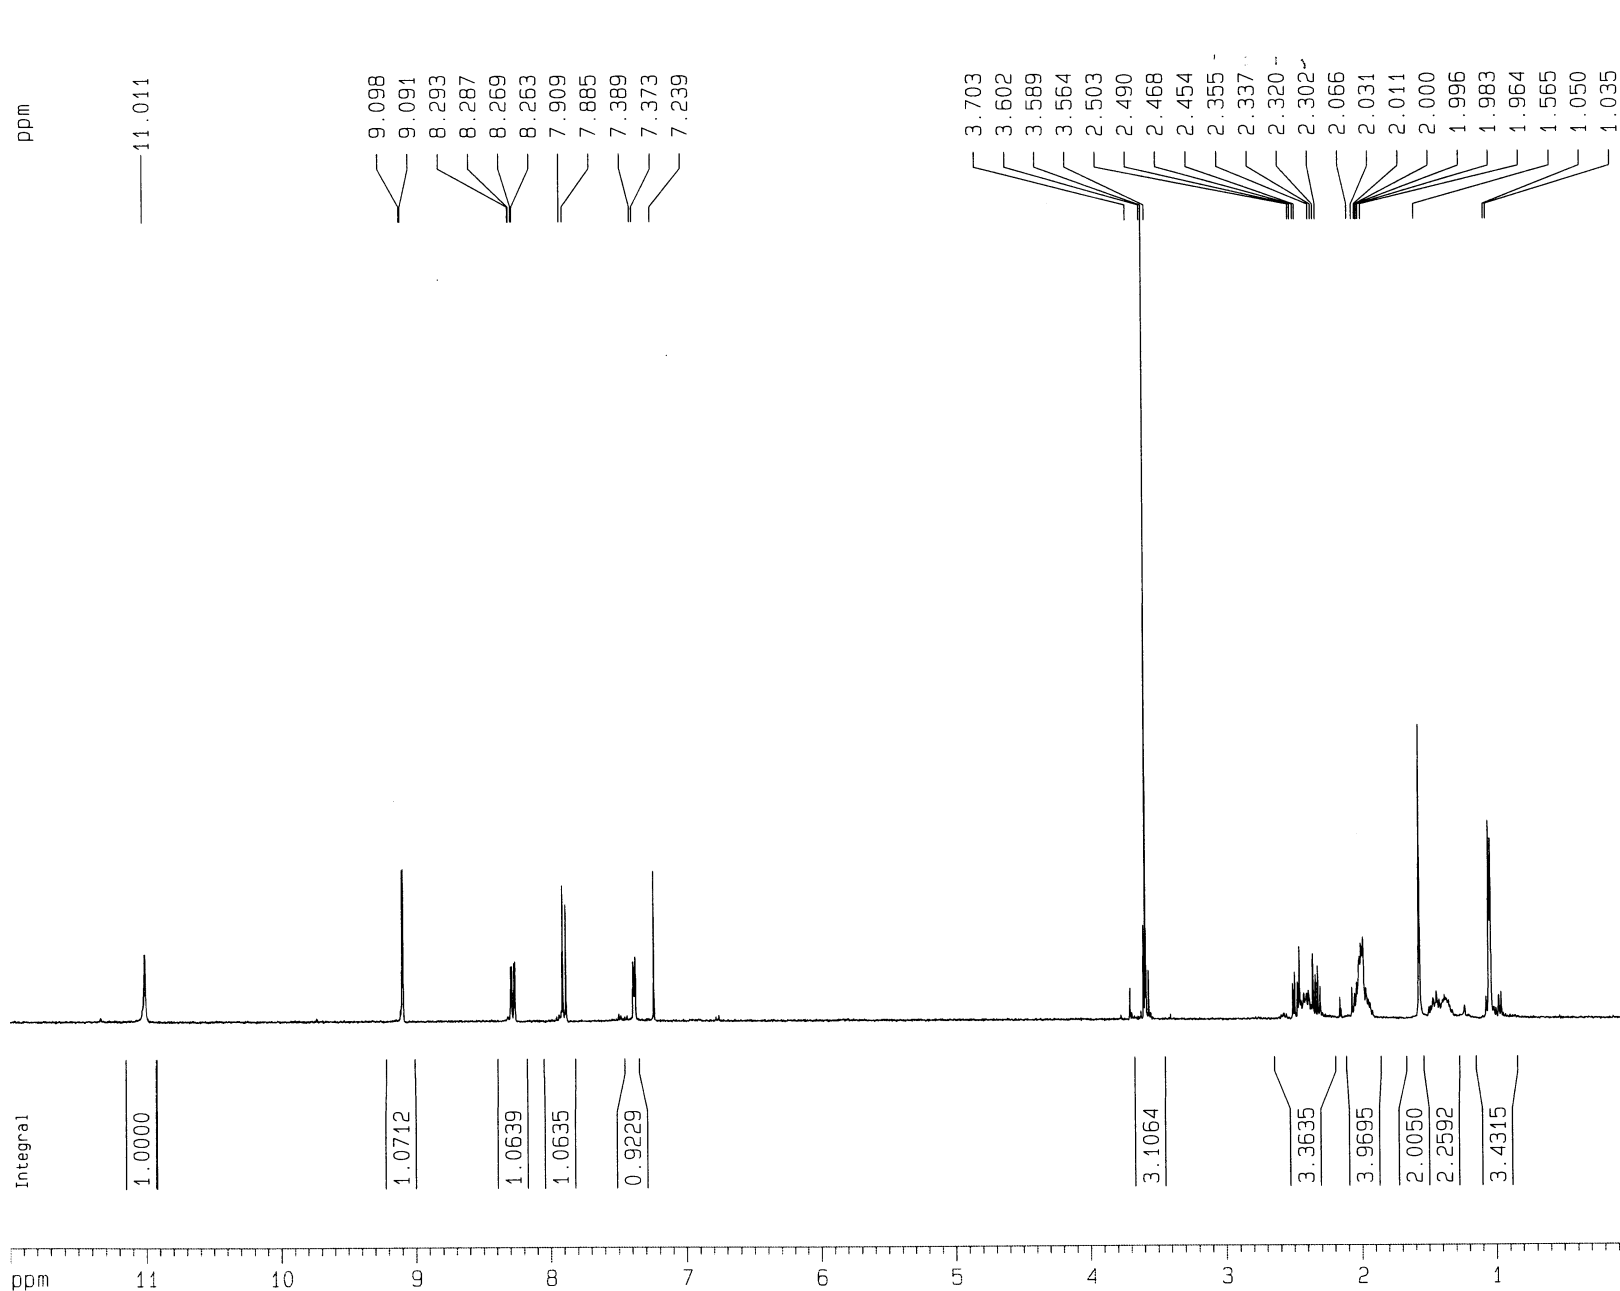

## Current Data Parameters

NAME PDC-02-433f2  
EXPNO 1  
PROCNO 1

## F2 - Acquisition Parameters

Date\_ 20150407  
Time 23.34  
INSTRUM spect  
PROBHD 5 mm QNP 1H  
PULPROG zg30  
TD 16384  
SOLVENT CDCl3  
NS 16  
DS 0  
SWH 5995.204 Hz  
FIDRES 0.365918 Hz  
AQ 1.3664756 sec  
RG 5792.6  
DW 83.400 usec  
DE 6.50 usec  
TE 300.0 K  
D1 1.50000000 sec

## ===== CHANNEL f1 =====

NUC1 1H  
P1 11.90 usec  
PL1 -3.00 dB  
SF01 400.1326008 MHz

## F2 - Processing parameters

SI 8192  
SF 400.1300179 MHz  
WDW EM  
SSB 0  
LB 0.10 Hz  
GB 0  
PC 1.00

## 1D NMR plot parameters

CX 21.50 cm  
F1P 12.000 ppm  
F1 4801.56 Hz  
F2P -0.000 ppm  
F2 -0.00 Hz  
PPMCM 0.55814 ppm/cm  
HZCM 223.32837 Hz/cm

<sup>13</sup>C NMR (100 MHz, CDCl<sub>3</sub>) of compound 3

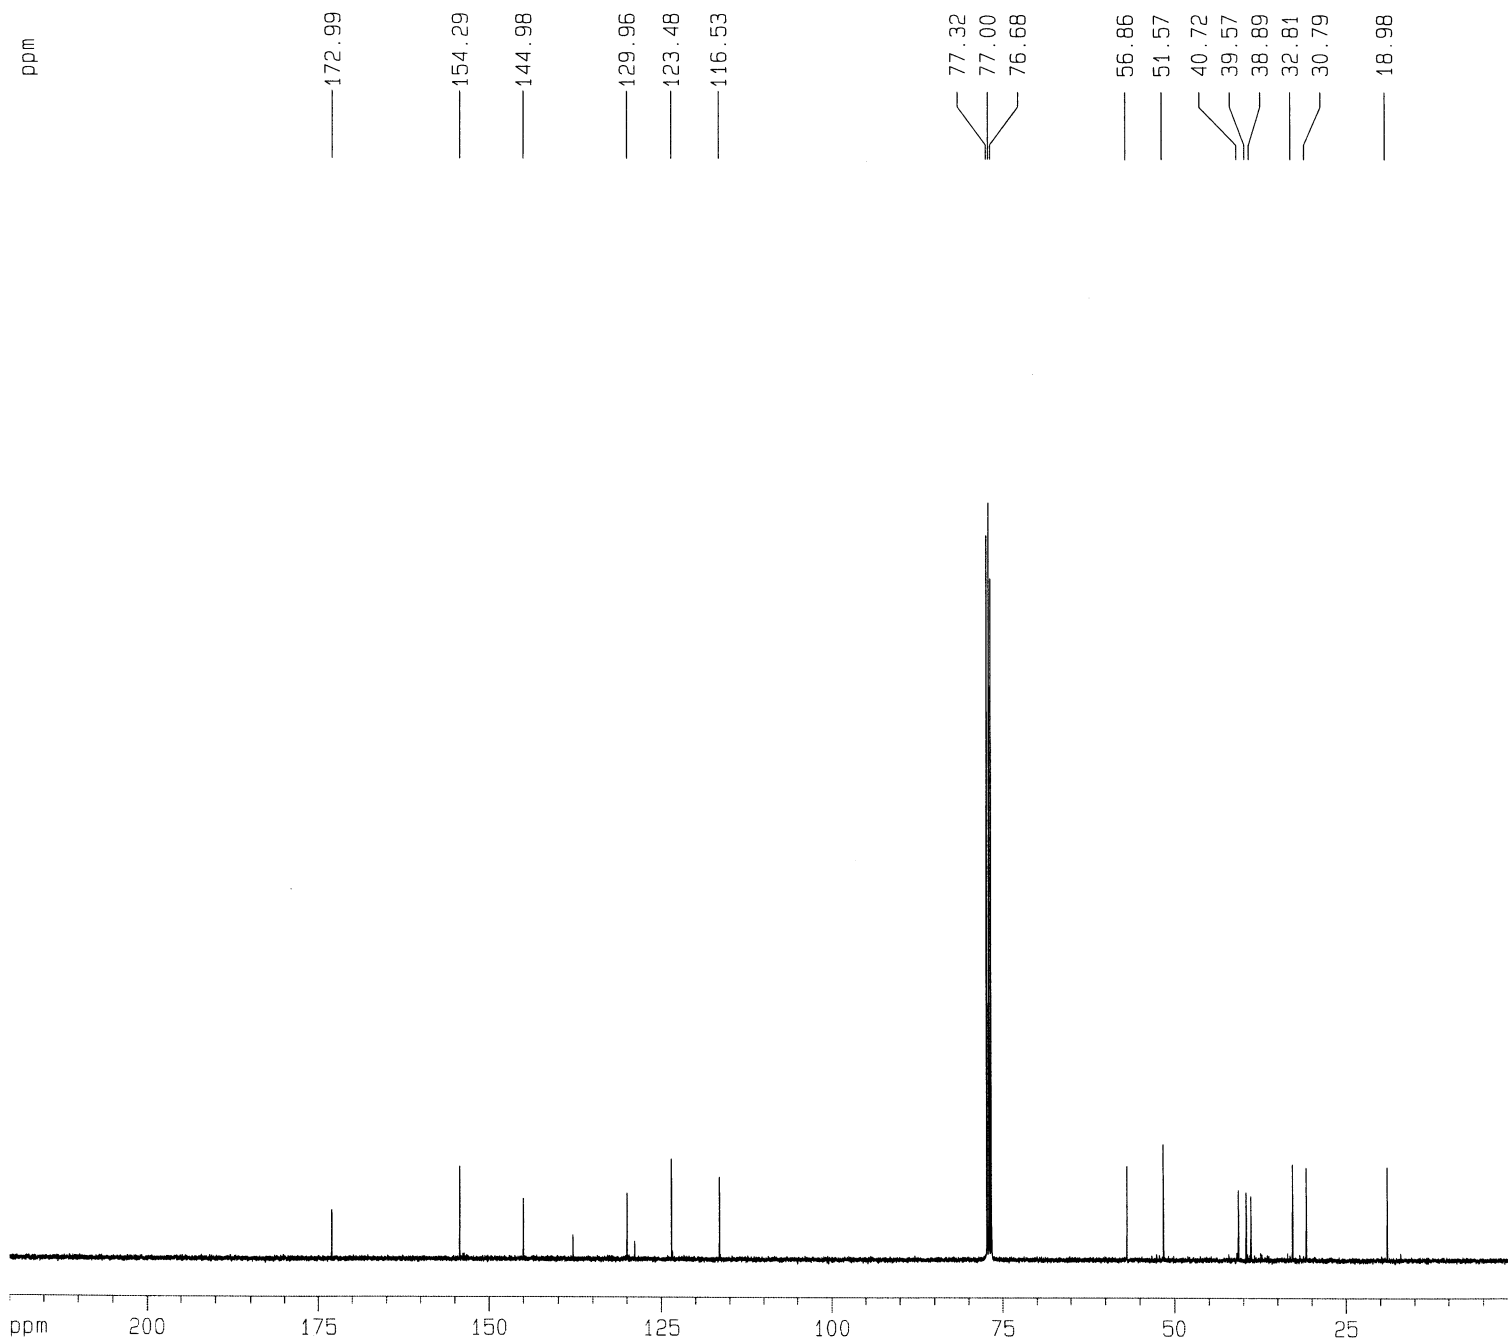

## Current Data Parameters

NAME PDC-02-433f2  
EXPNO 2  
PROCNO 1

## F2 - Acquisition Parameters

Date\_ 20150408  
Time 3.20  
INSTRUM spect  
PROBHD 5 mm QNP 1H  
PULPROG zgpg30  
TD 65536  
SOLVENT CDCl3  
NS 4096  
DS 4  
SWH 25125.629 Hz  
FIDRES 0.383387 Hz  
AQ 1.3042164 sec  
RG 256  
DW 19.900 usec  
DE 6.50 usec  
TE 300.0 K  
D1 2.0000000 sec  
d11 0.0300000 sec  
d12 0.00002000 sec

## ===== CHANNEL f1 =====

NUC1 13C  
P1 10.20 usec  
PL1 0.00 dB  
SF01 100.6237959 MHz

## ===== CHANNEL f2 =====

CPDPRG2 waltz16  
NUC2 1H  
PCPD2 90.00 usec  
PL2 -3.00 dB  
PL12 14.50 dB  
PL13 17.50 dB  
SF02 400.1326008 MHz

## F2 - Processing parameters

SI 32768  
SF 100.6127708 MHz  
WDW EM  
SSB 0  
LB 0.30 Hz  
GB 0  
PC 1.40

## 1D NMR plot parameters

CX 20.00 cm  
F1P 220.000 ppm  
F1 22134.81 Hz  
F2P 0.000 ppm  
F2 0.00 Hz  
PPMCM 11.00000 ppm/cm  
HZCM 1106.74048 Hz/cm

DEPT of compound 3

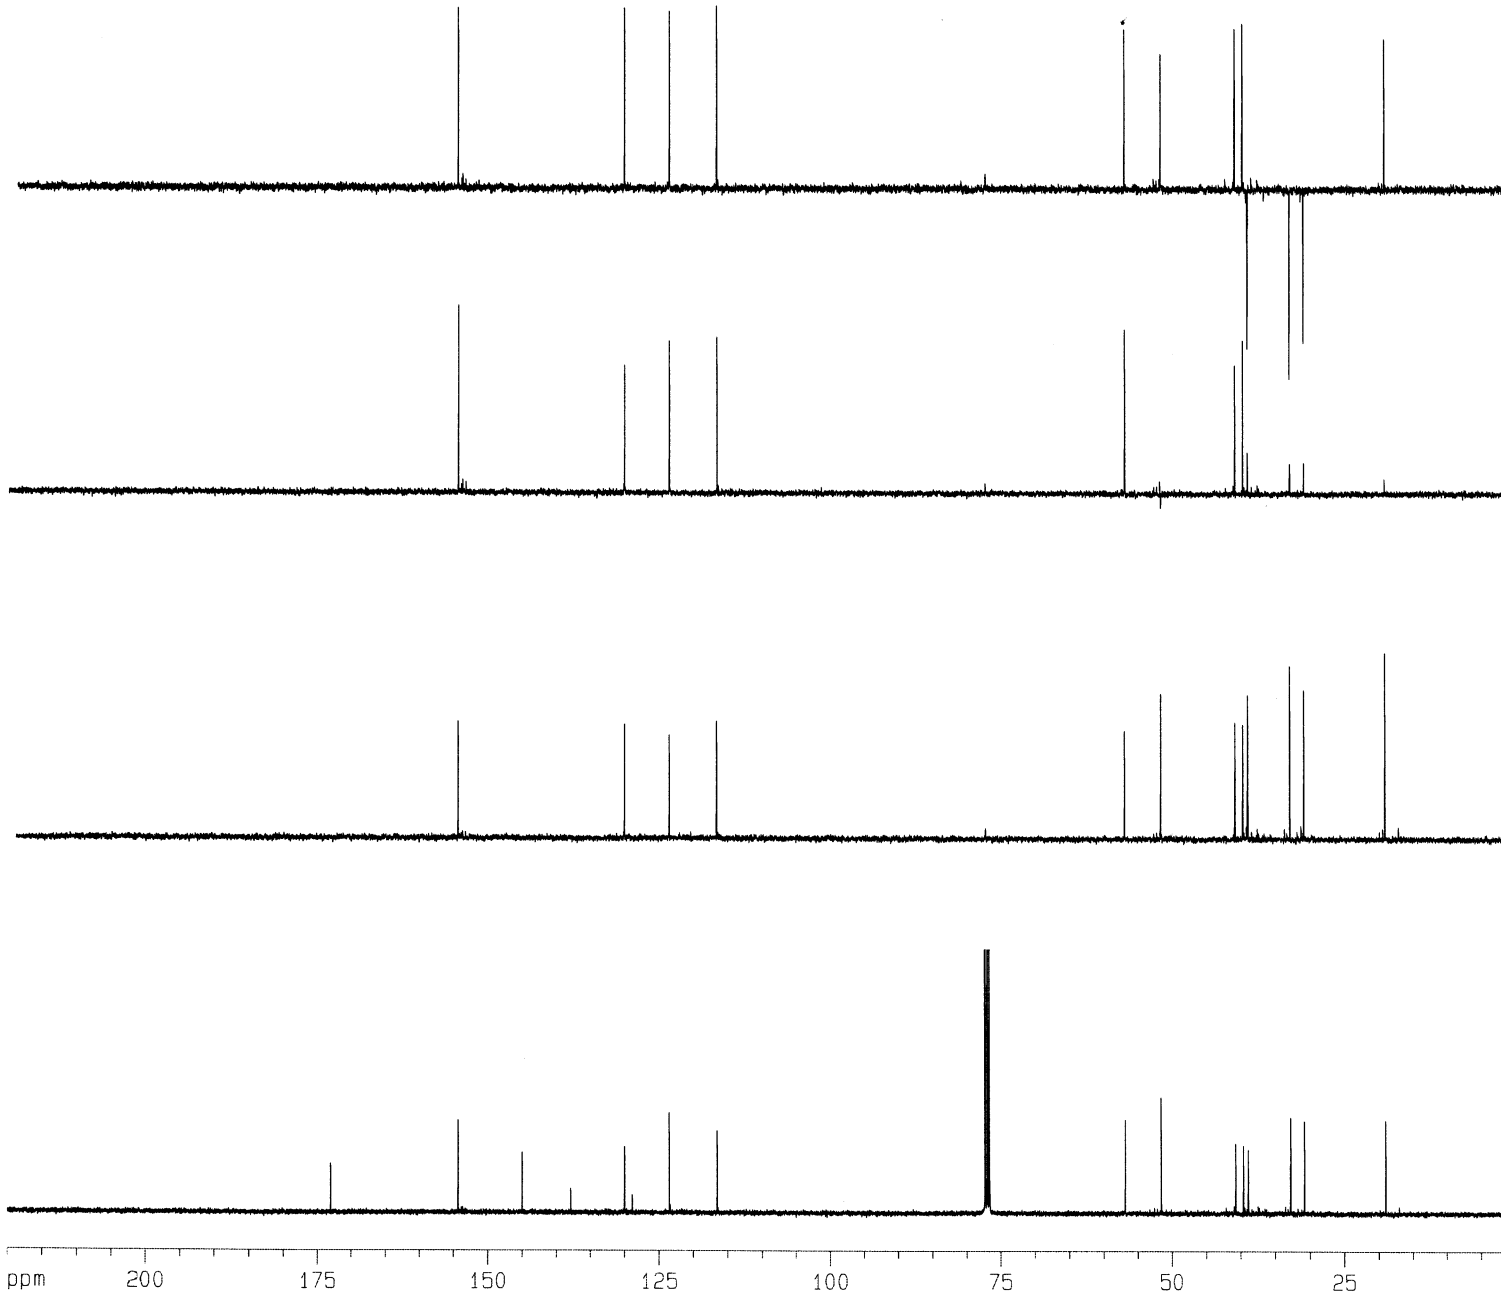

Current Data Parameters

NAME PDC-02-433f2  
 EXPNO 2  
 PROCNO 1

F2 - Acquisition Parameters

Date\_ 20150408  
 Time 3.20  
 INSTRUM spect  
 PROBHD 5 mm QNP 1H  
 PULPROG zgpg30  
 TD 65536  
 SOLVENT CDCl3  
 NS 4096  
 DS 4  
 SWH 25125.629 Hz  
 FIDRES 0.383387 Hz  
 AQ 1.3042164 sec  
 RG 256  
 DW 19.900 usec  
 DE 6.50 usec  
 TE 300.0 K  
 D1 2.0000000 sec  
 d11 0.0300000 sec  
 d12 0.0002000 sec

===== CHANNEL f1 =====

NUC1 13C  
 P1 10.20 usec  
 PL1 0.00 dB  
 SF01 100.6237959 MHz

===== CHANNEL f2 =====

CPDPRG2 waltz16  
 NUC2 1H  
 PCPD2 90.00 usec  
 PL2 -3.00 dB  
 PL12 14.50 dB  
 PL13 17.50 dB  
 SF02 400.1326008 MHz

F2 - Processing parameters

SI 32768  
 SF 100.6127708 MHz  
 WDW EM  
 SSB 0  
 LB 0.30 Hz  
 GB 0  
 PC 1.40

1D NMR plot parameters

CX 20.00 cm  
 F1P 220.000 ppm  
 F1 22134.81 Hz  
 F2P 0.000 ppm  
 F2 0.00 Hz  
 PPMCM 11.00000 ppm/cm  
 HZCM 1106.74048 Hz/cm

Sample Name **PDC-02-433-f2-2D**  
Date collected **2016-04-12**

Pulse sequence **gHSQC**  
Solvent **cdcl3**

Temperature **25**  
Spectrometer **Agilent-NMR-inova500**

Study owner **vnmr2**  
Operator **vnmr2**

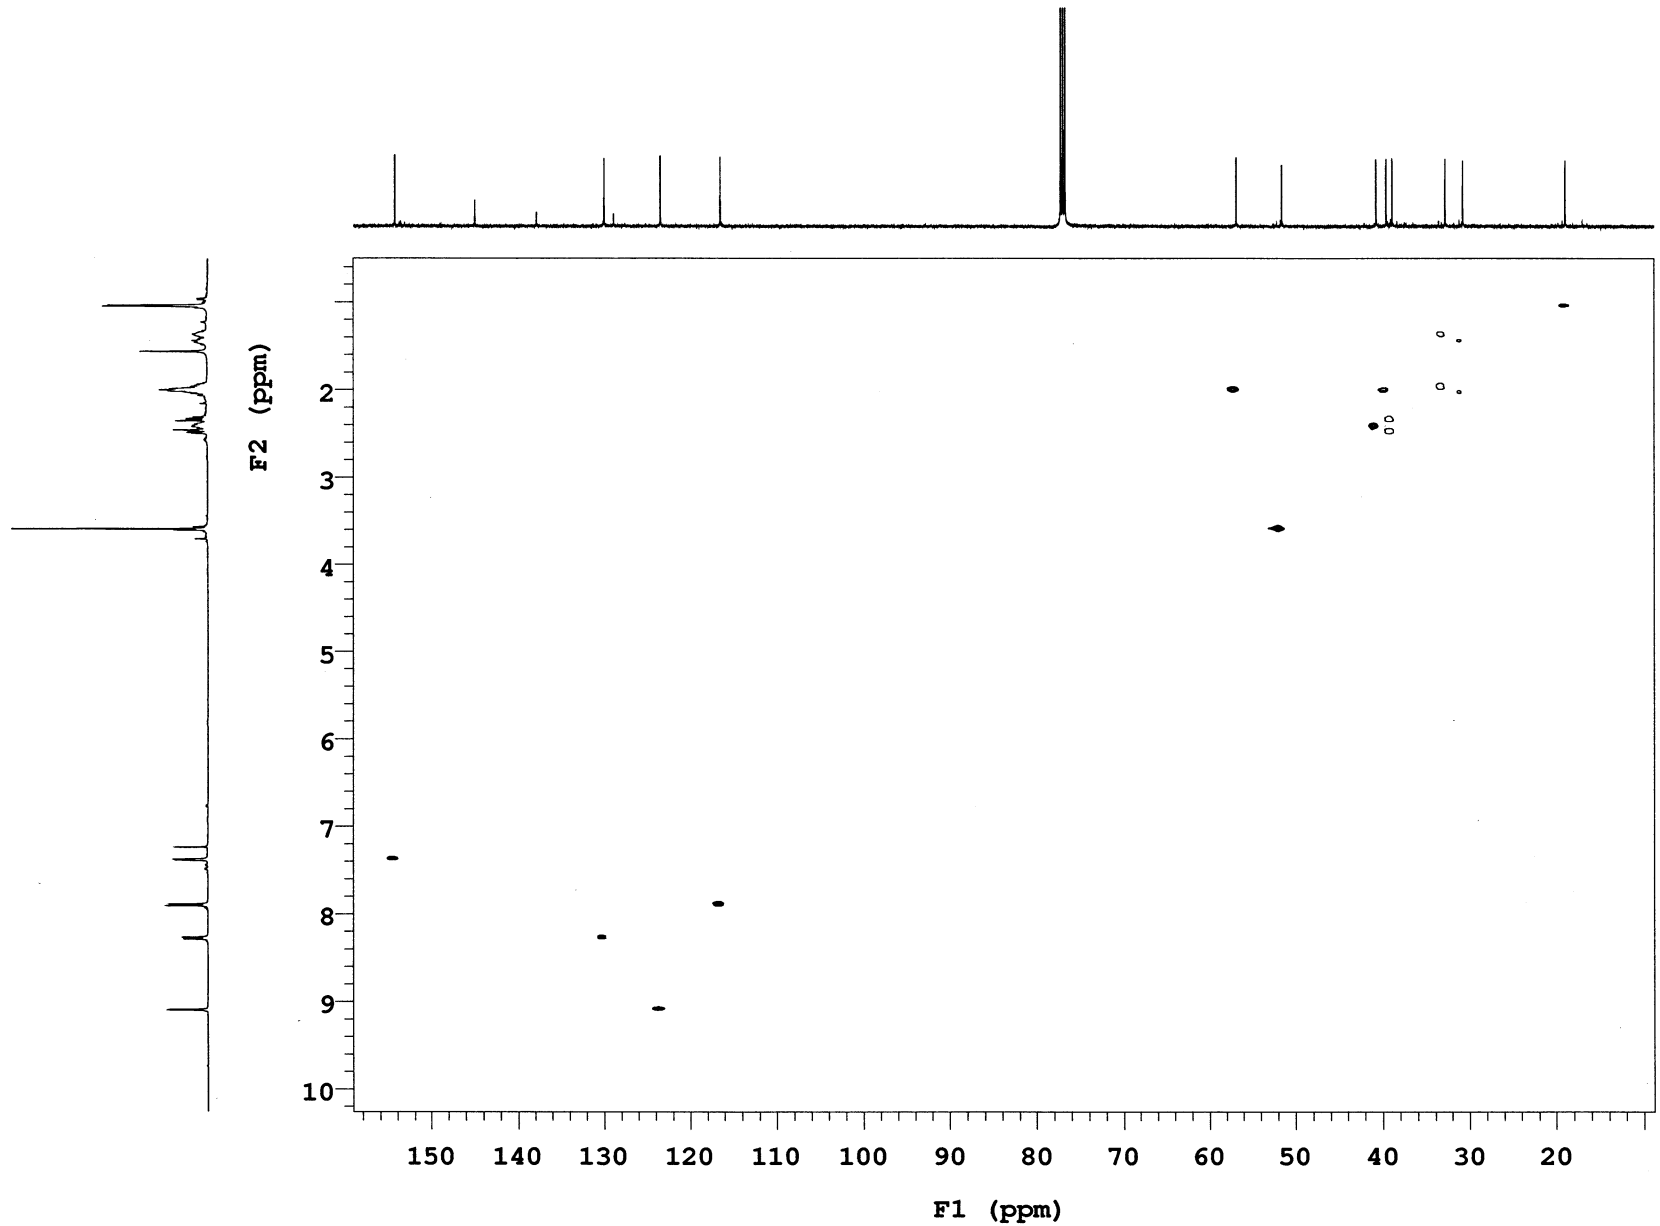

Sample Name **PDC-02-433-f2-2D**  
Date collected **2016-04-12**

Pulse sequence **gCOSY**  
Solvent **cdcl3**

Temperature **25**  
Spectrometer **Agilent-NMR-inova500**

Study owner **vnmr2**  
Operator **vnmr2**

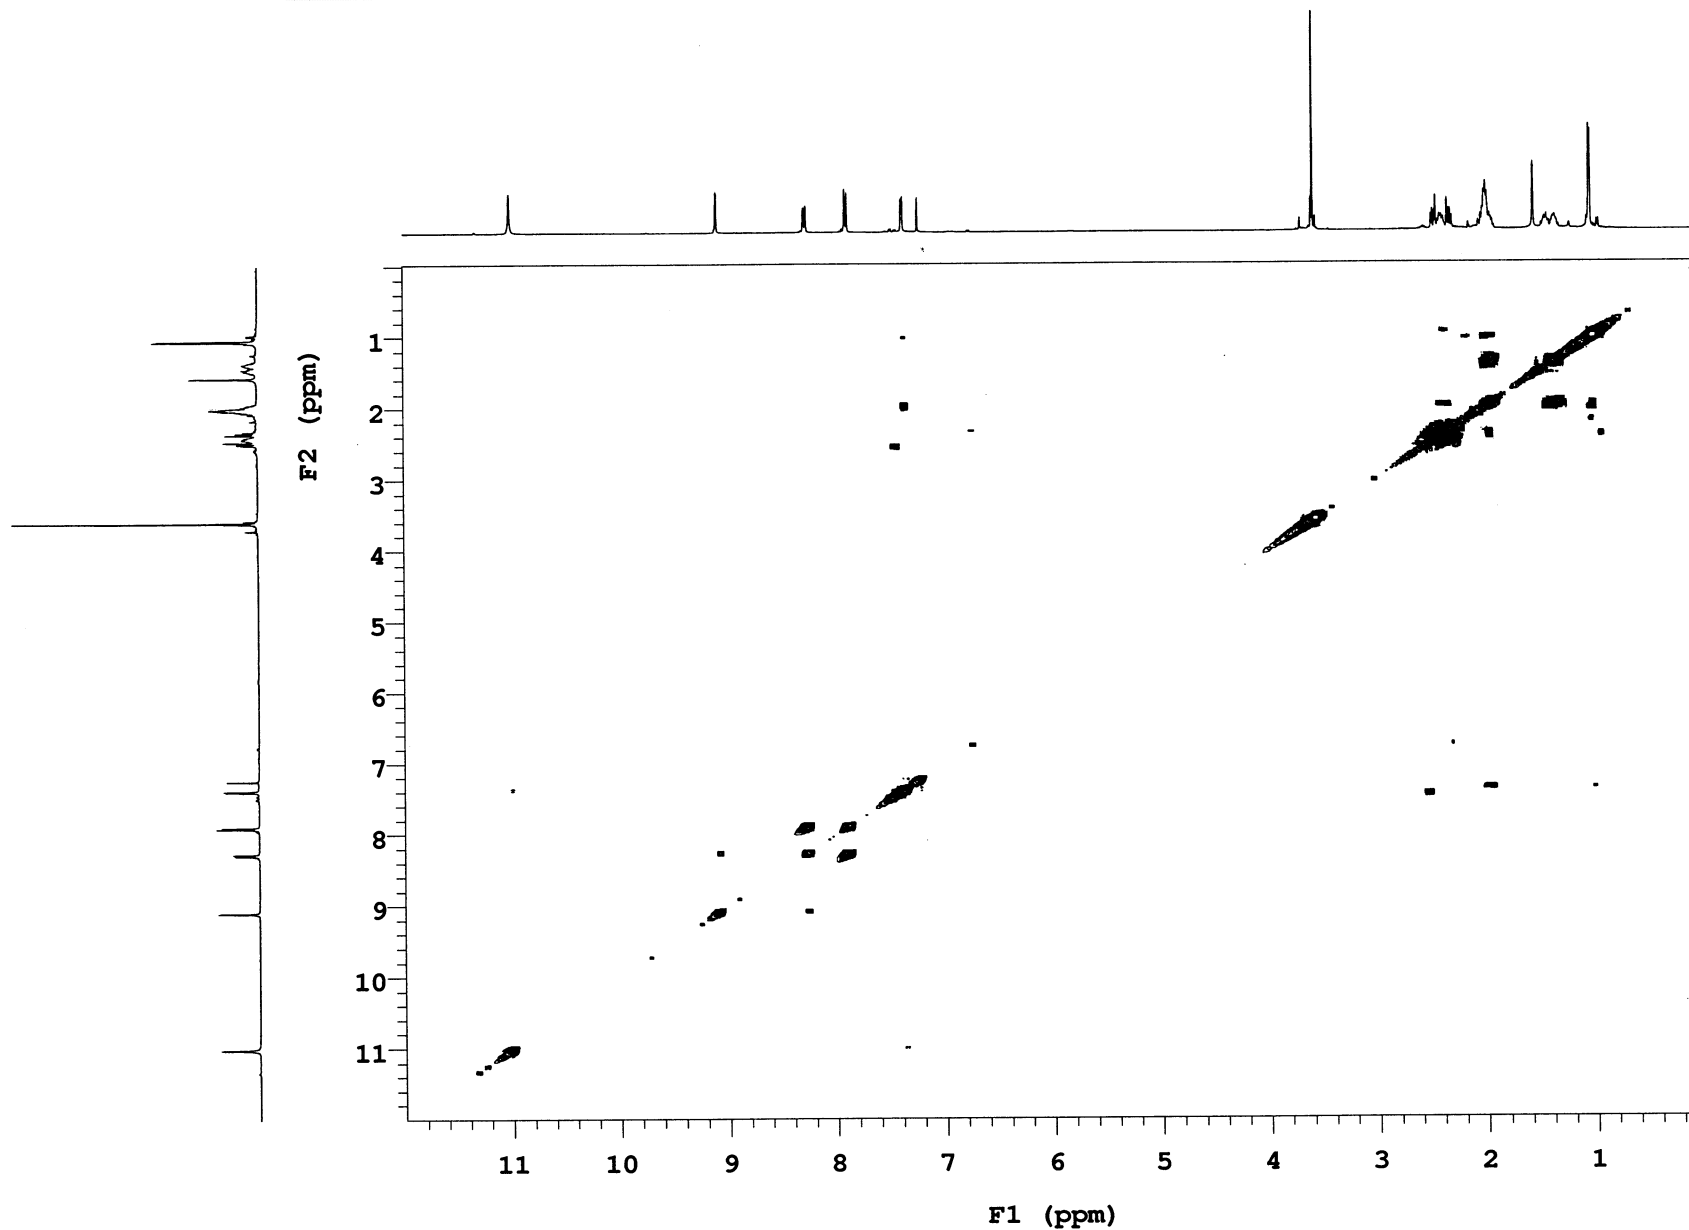

COSY of compound 3

Sample Name **PDC-02-433-f2-2D**  
Date collected **2016-04-12**

Pulse sequence **NOESY**  
Solvent **cdcl3**

Temperature **25**  
Spectrometer **Agilent-NMR-inova500**

Study owner **vnmr2**  
Operator **vnmr2**

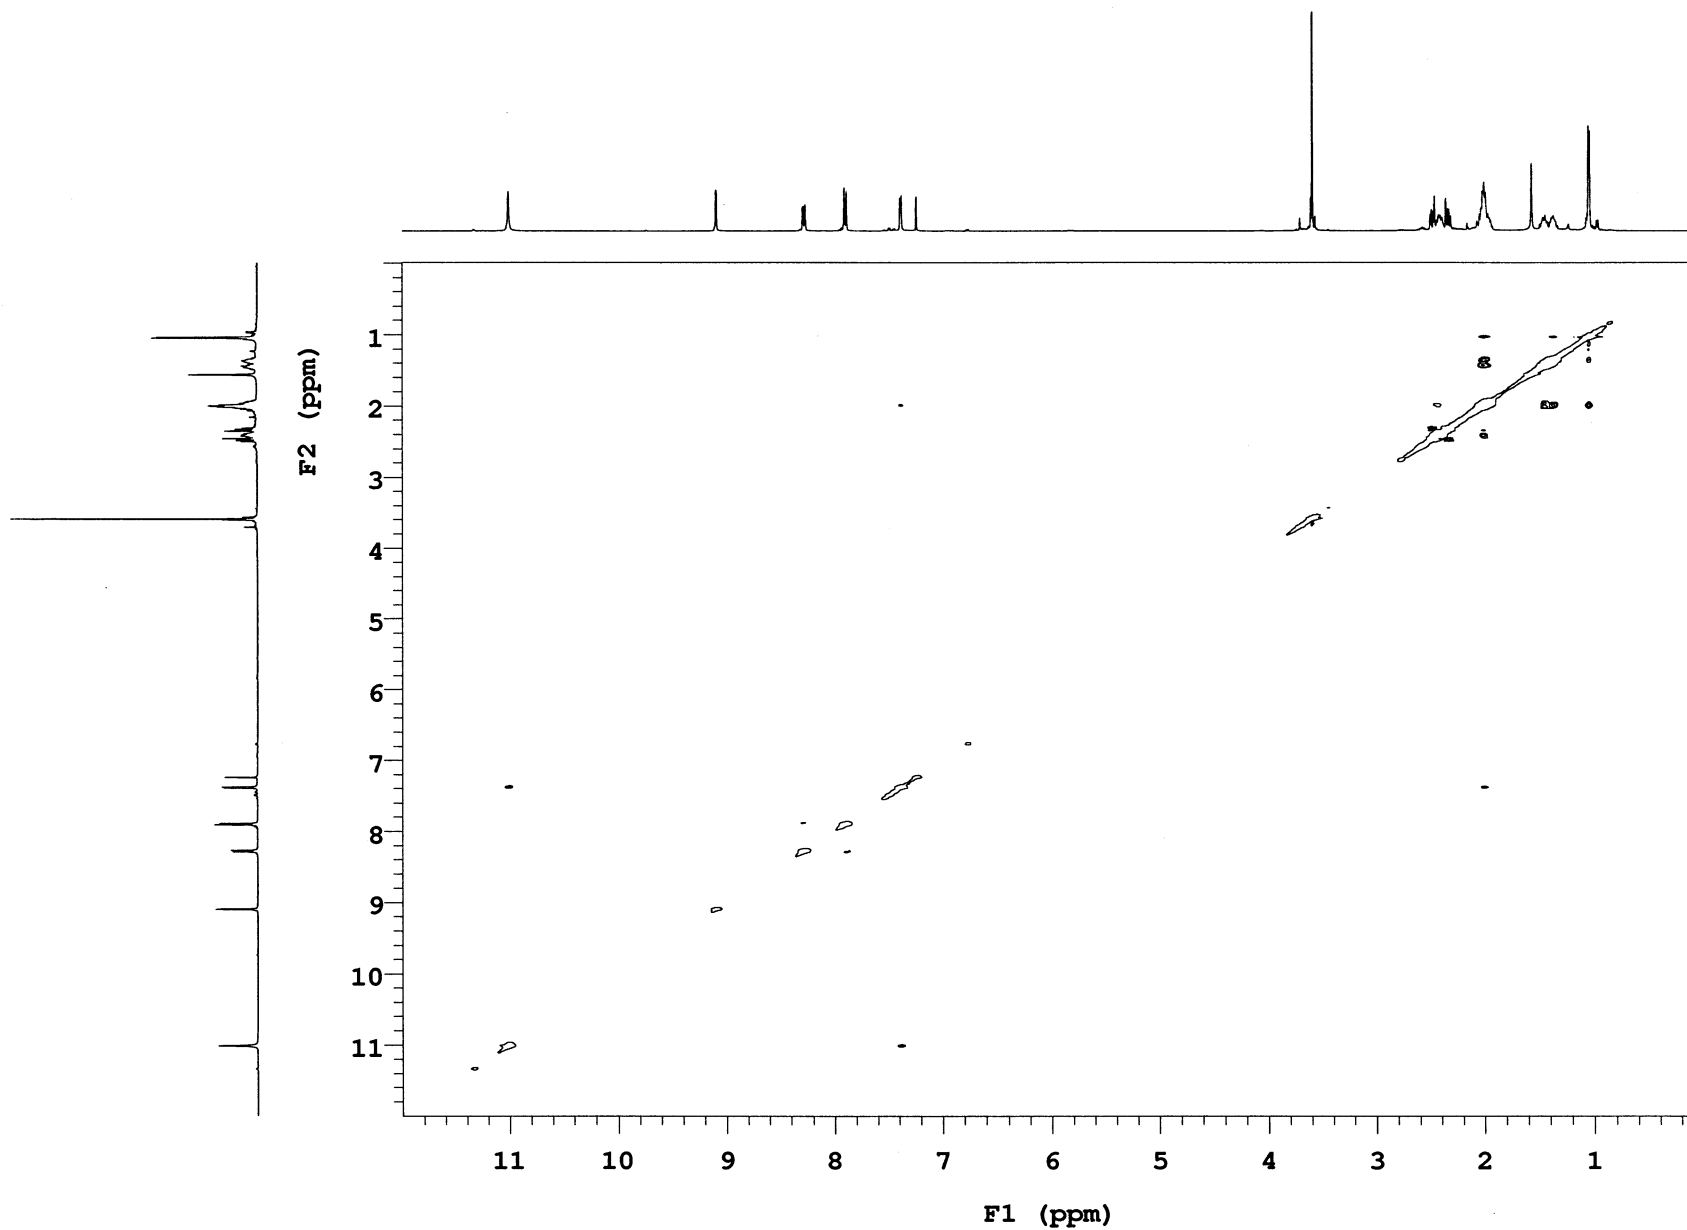



Sample Name **PDC-02-425-F1**  
 Date collected **2016-04-28**

Pulse sequence **PROTON**  
 Solvent **cdcl3**

Temperature **25**  
 Spectrometer **Agilent-NMR-inova500**

Study owner **vnmr2**  
 Operator **vnmr2**

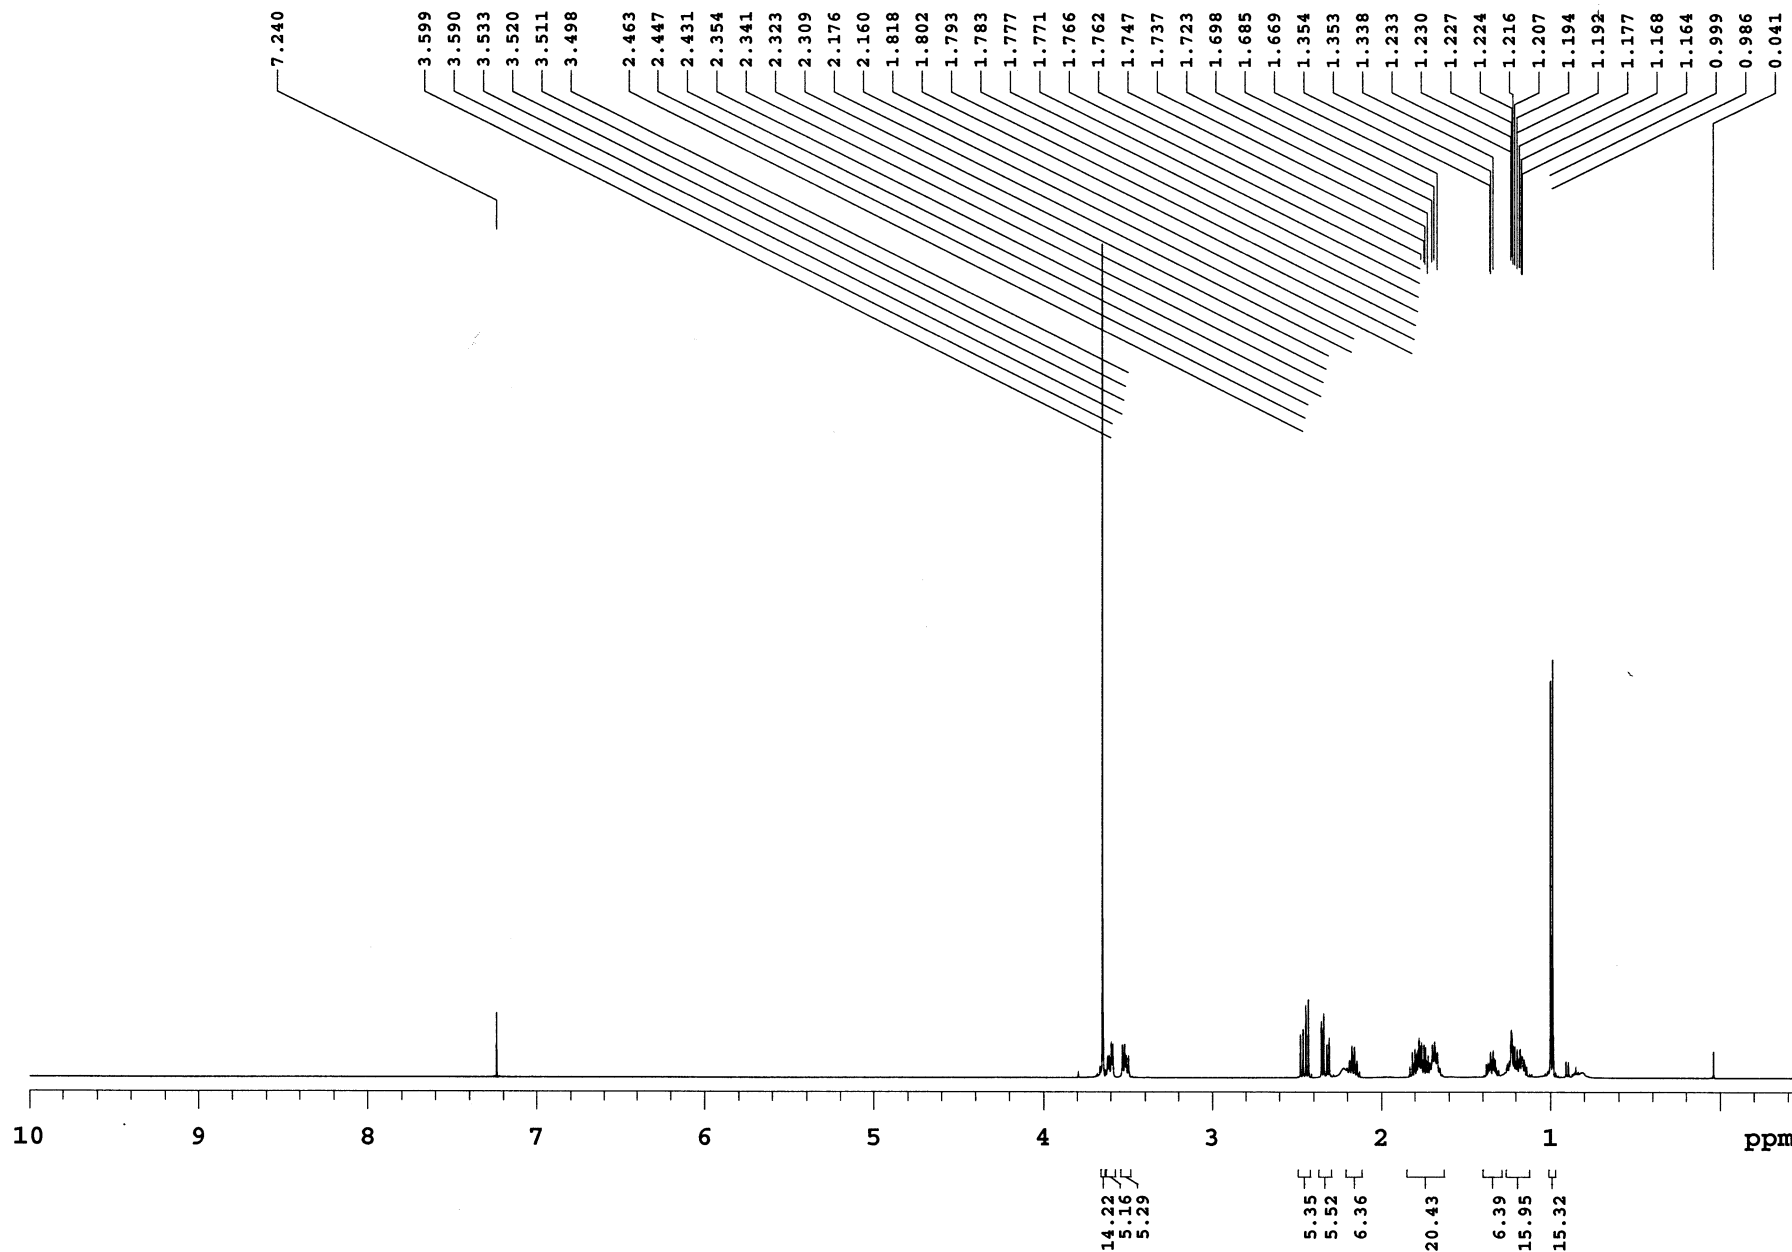

Sample Name **PDC-02-425-F1** Pulse sequence **CARBON** Temperature **25** Study owner **vnmr2**  
Date collected **2016-04-28** Solvent **cdcl3** Spectrometer **Agilent-NMR-inova500** Operator **vnmr2**

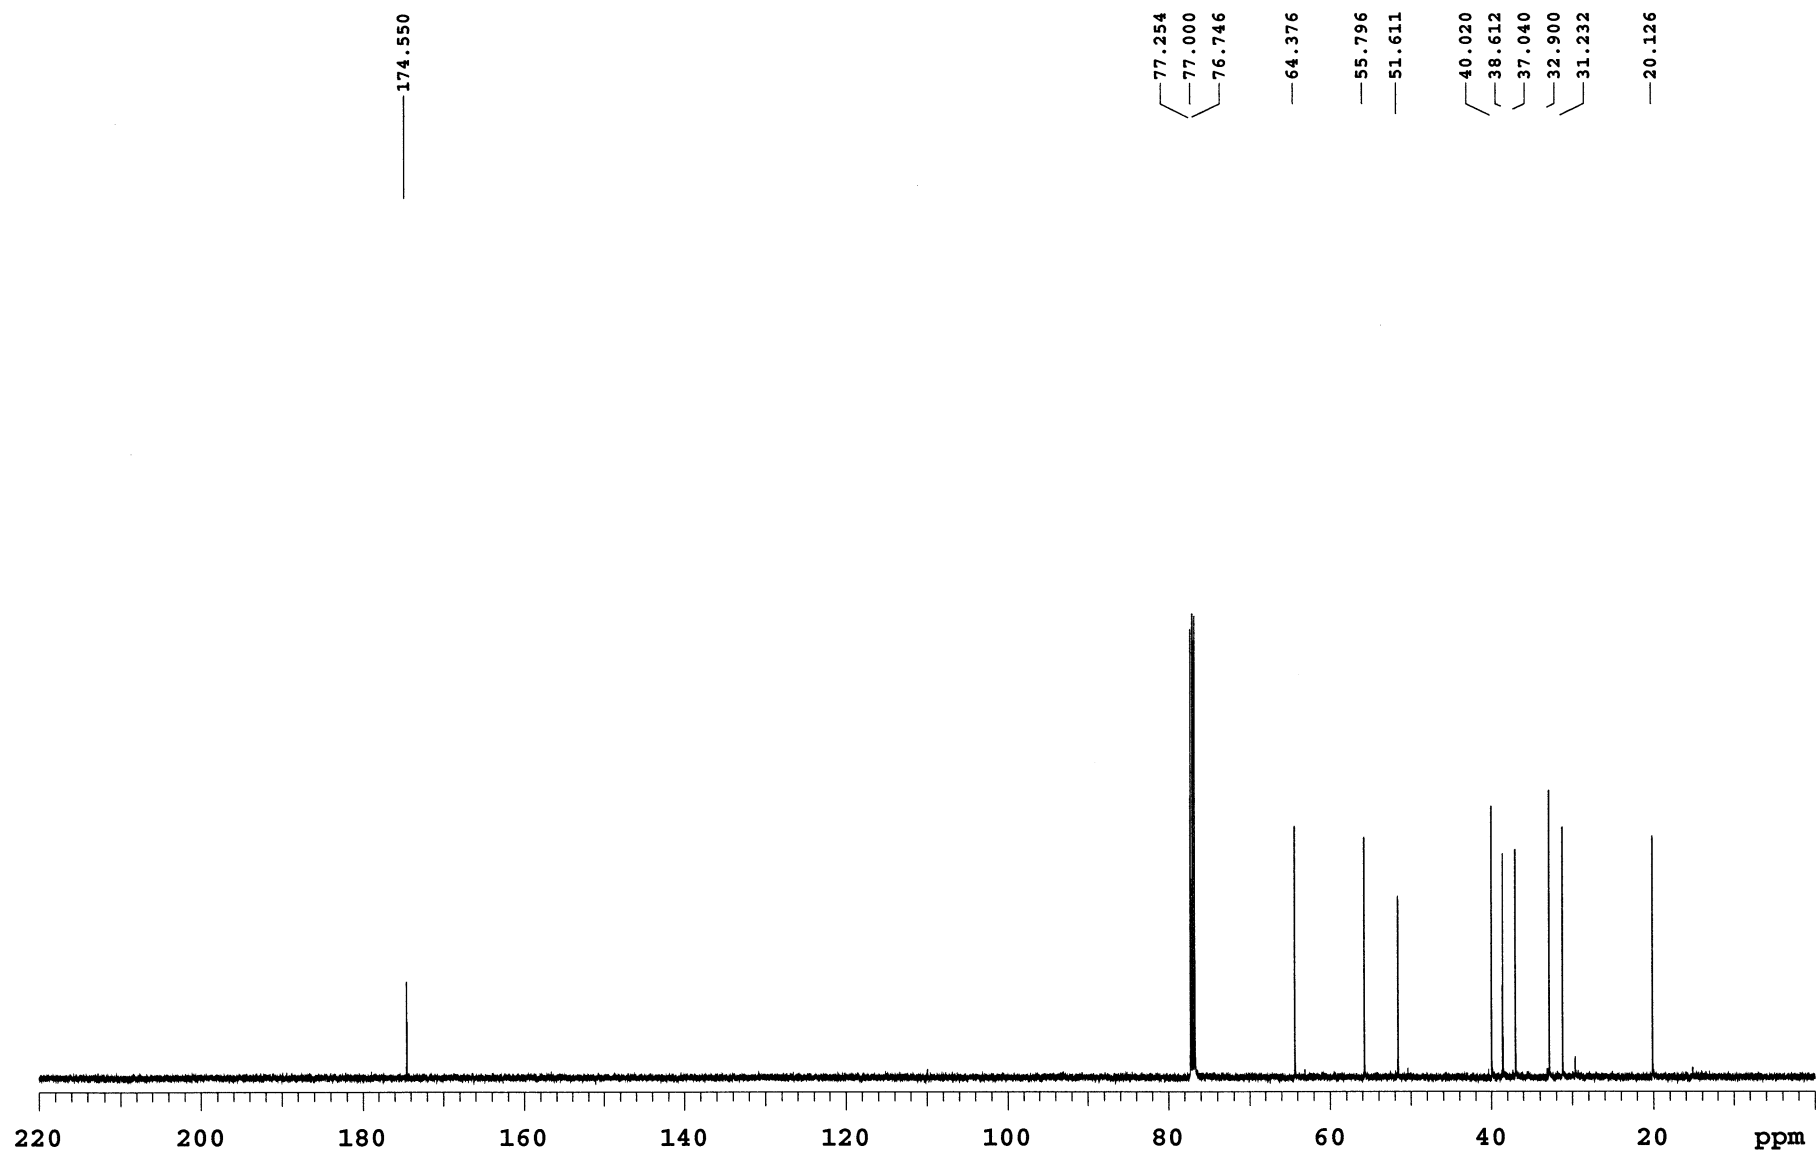

$^{13}\text{C}$  NMR (125 MHz,  $\text{CDCl}_3$ ) of compound 4

Sample Name **PDC-02-425-F1**  
Date collected **2016-04-28**

Pulse sequence **DEPT**  
Solvent **cdcl3**

Temperature **25**  
Spectrometer **Agilent-NMR-inova500**

Study owner **vnmr2**  
Operator **vnmr2**

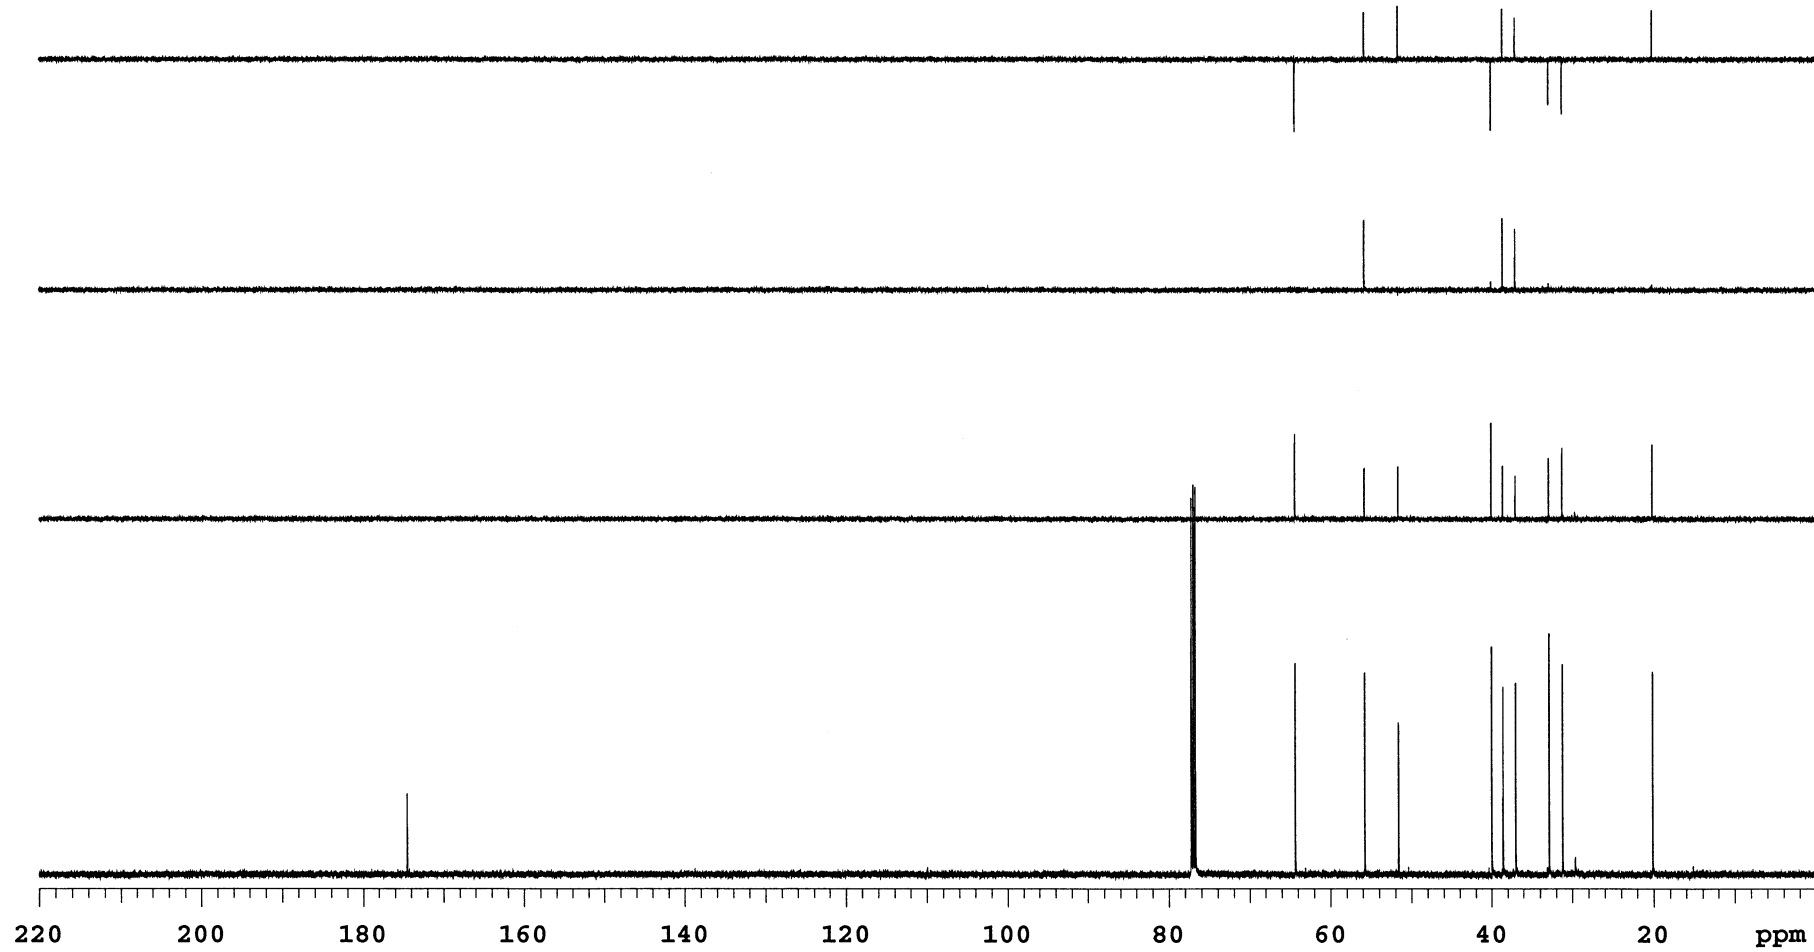

DEPT of compound 4

Sample Name **PDC-02-425-F1**  
Date collected **2016-05-09**

Pulse sequence **gHSQC**  
Solvent **cdcl3**

Temperature **25**  
Spectrometer **Agilent-NMR-inova500**

Study owner **vnmr2**  
Operator **vnmr2**

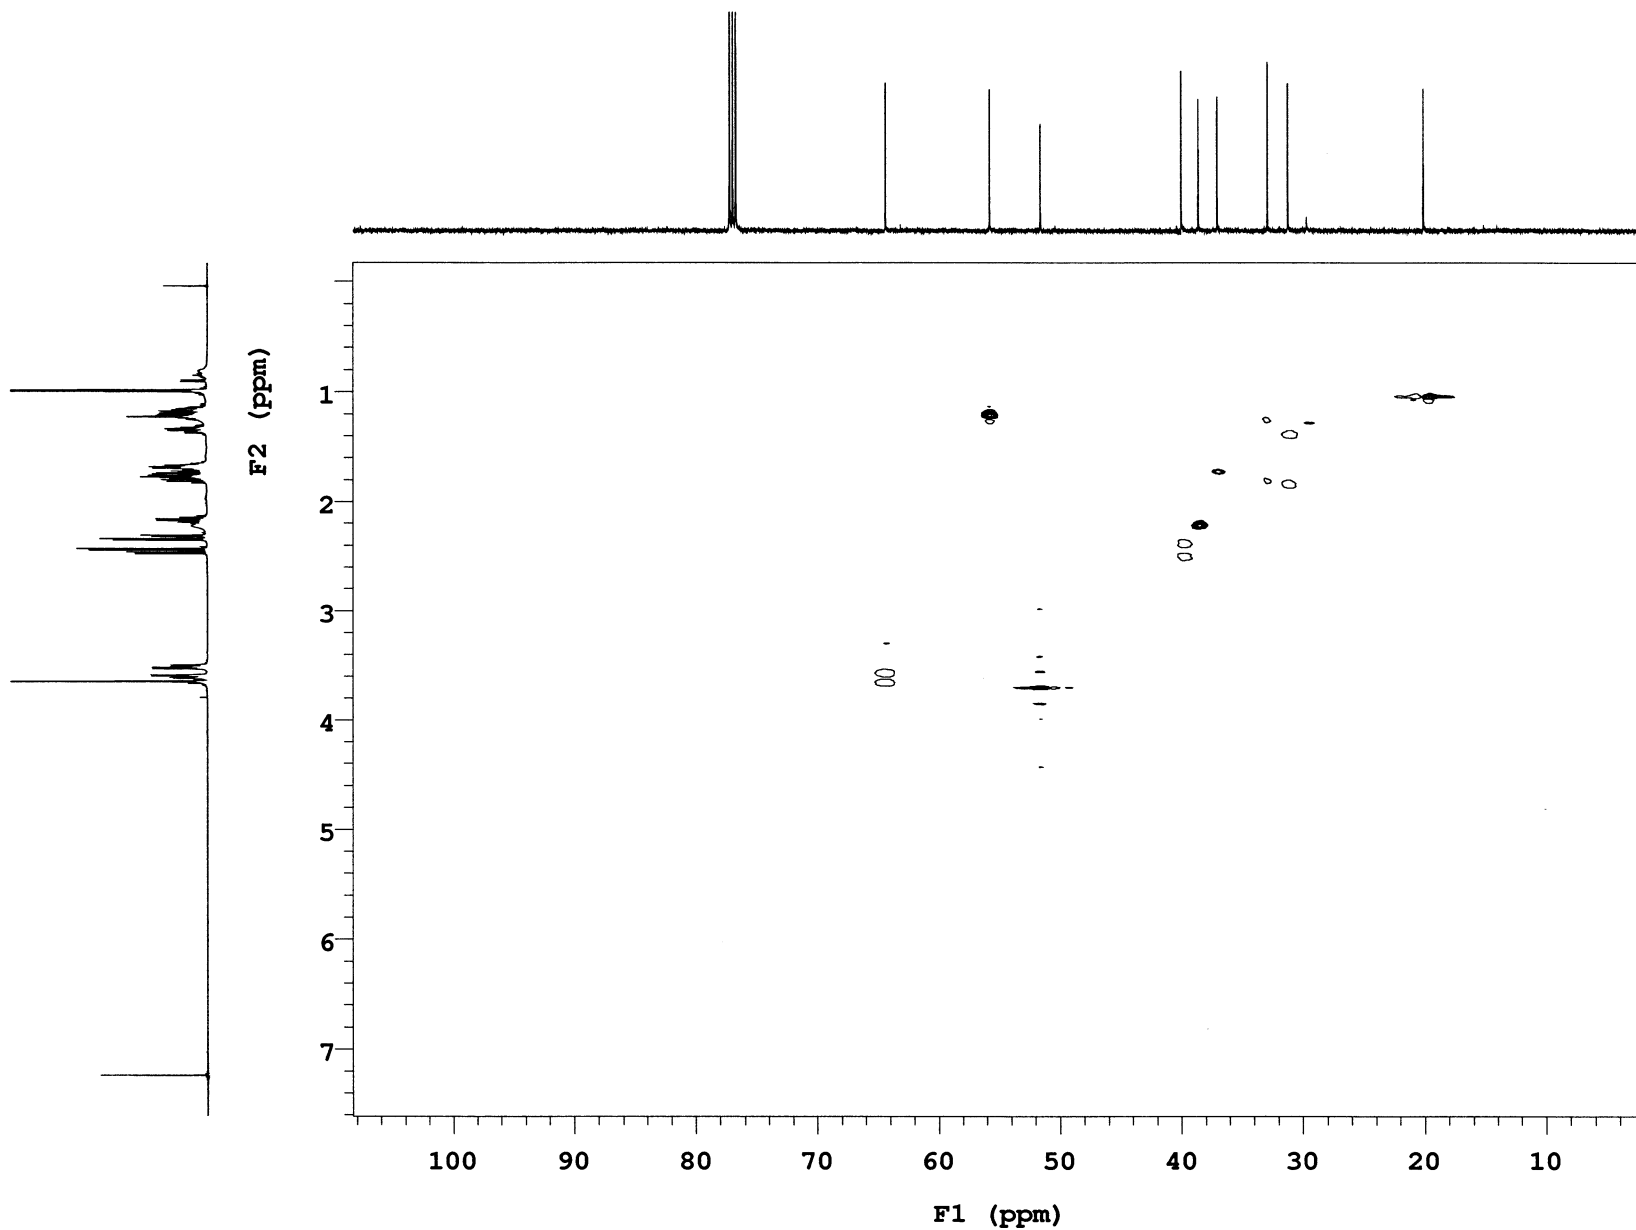

HSQC of compound 4

Sample Name **PDC-02-425-F1**  
Date collected **2016-05-09**

Pulse sequence **gCOSY**  
Solvent **cdcl3**

Temperature **25**  
Spectrometer **Agilent-NMR-inova500**

Study owner **vnmr2**  
Operator **vnmr2**

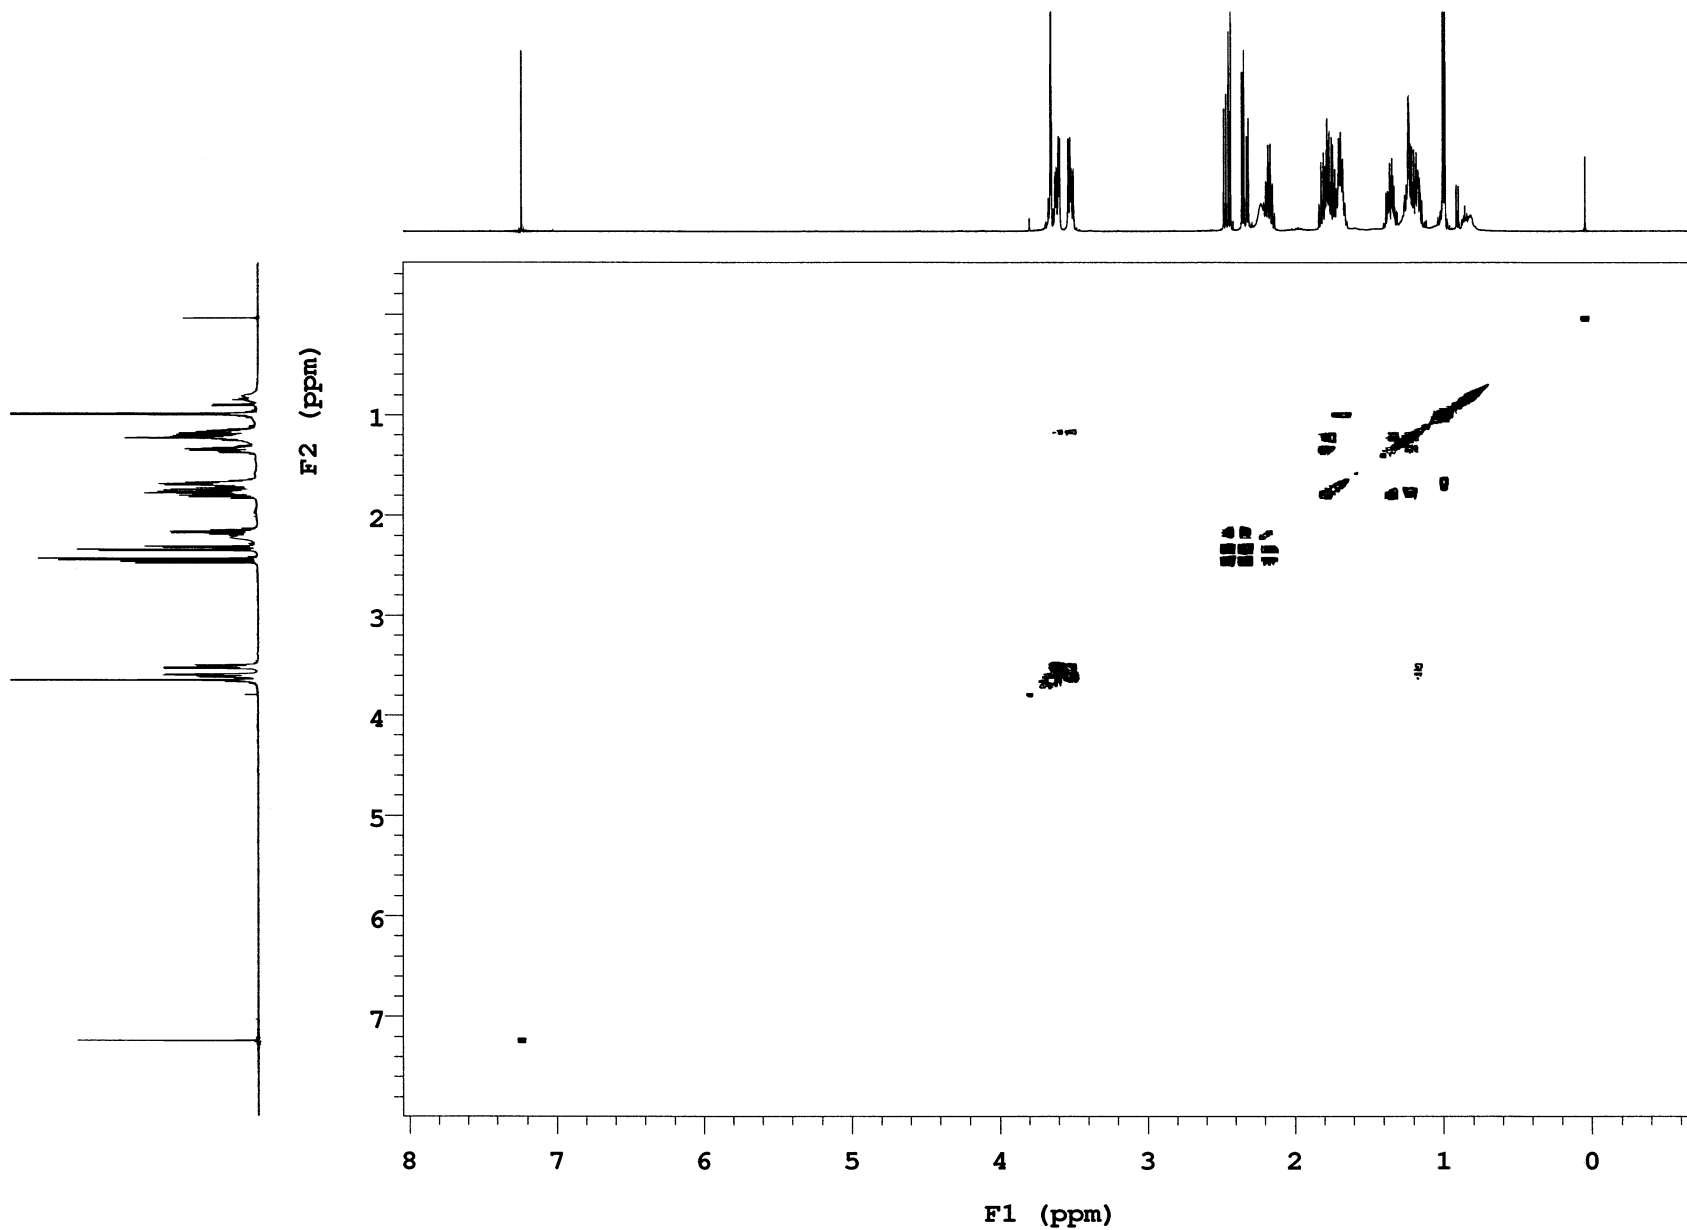

COSY of compound 4

Sample Name **PDC-02-425-F1**  
Date collected **2016-05-09**

Pulse sequence **NOESY**  
Solvent **cdcl3**

Temperature **25**  
Spectrometer **Agilent-NMR-inova500**

Study owner **vnmr2**  
Operator **vnmr2**

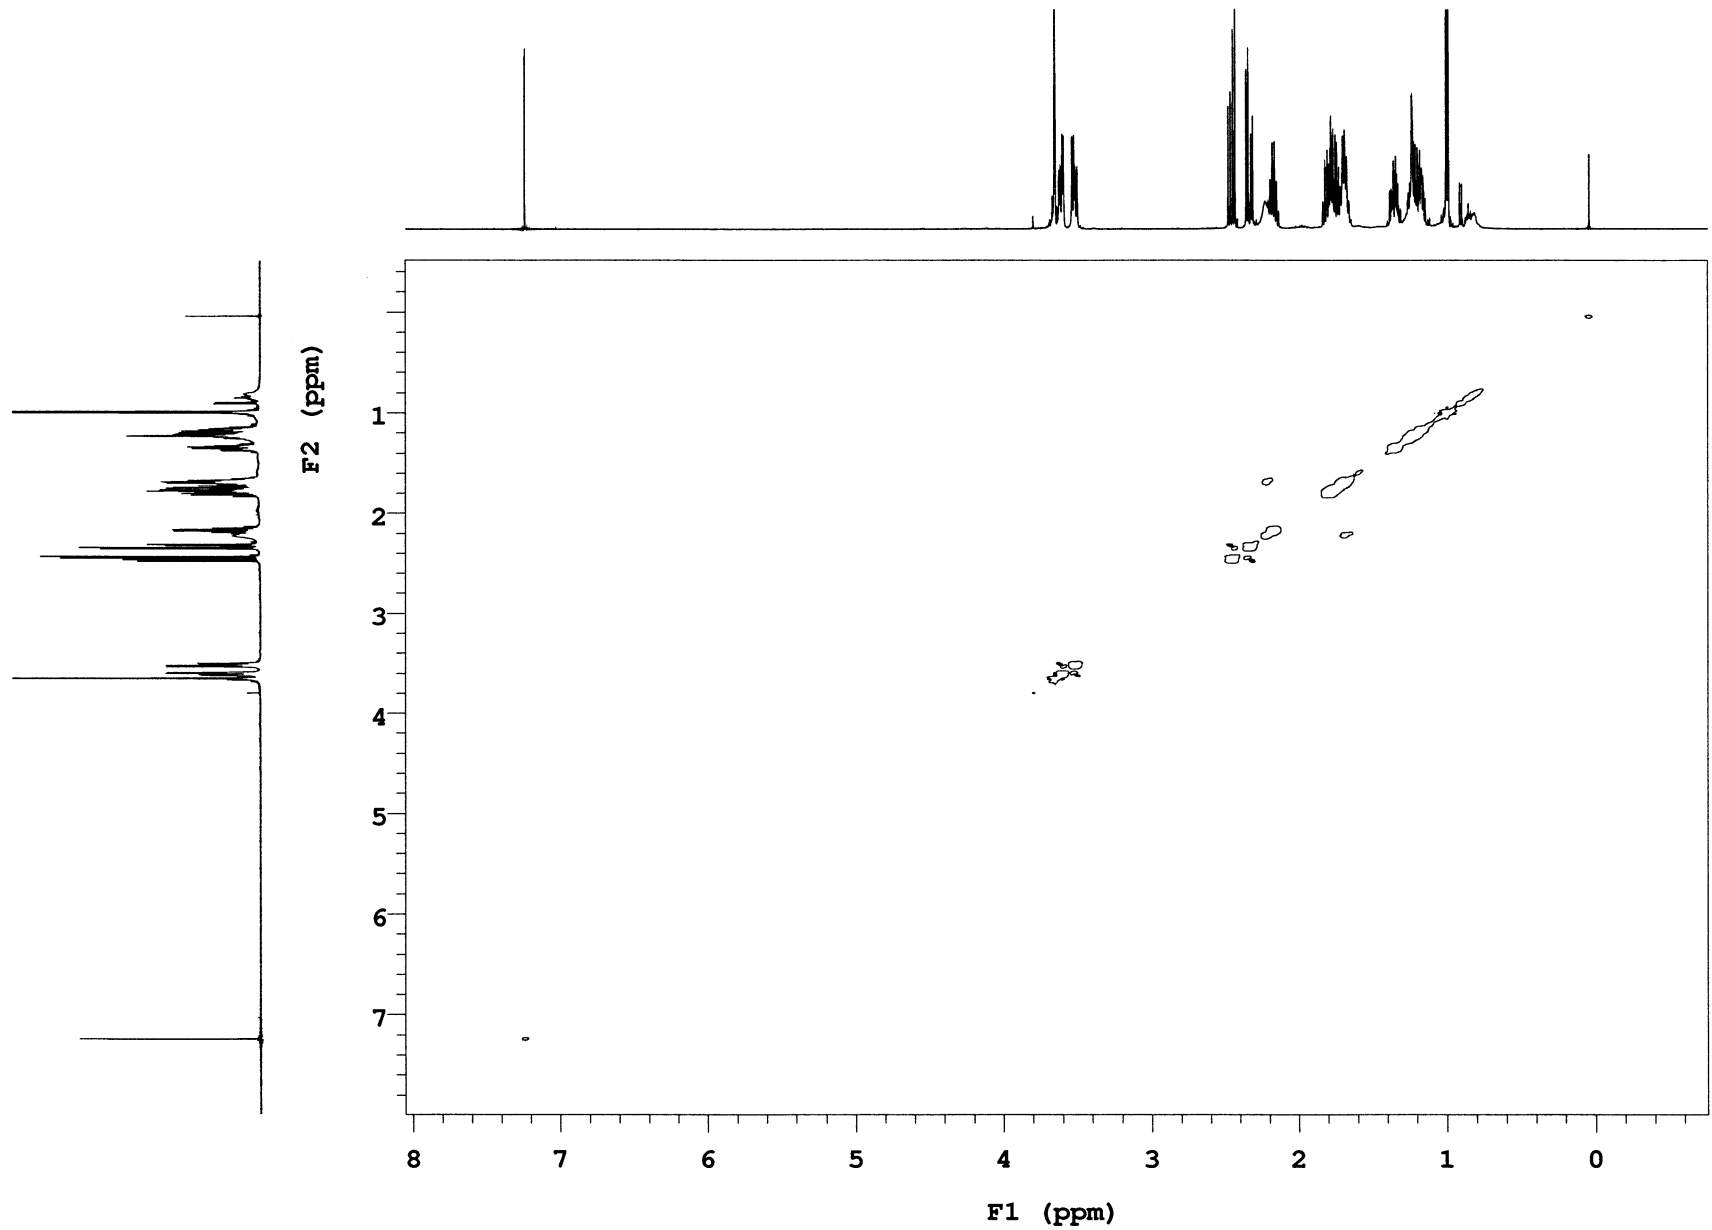

NOESY of compound 4

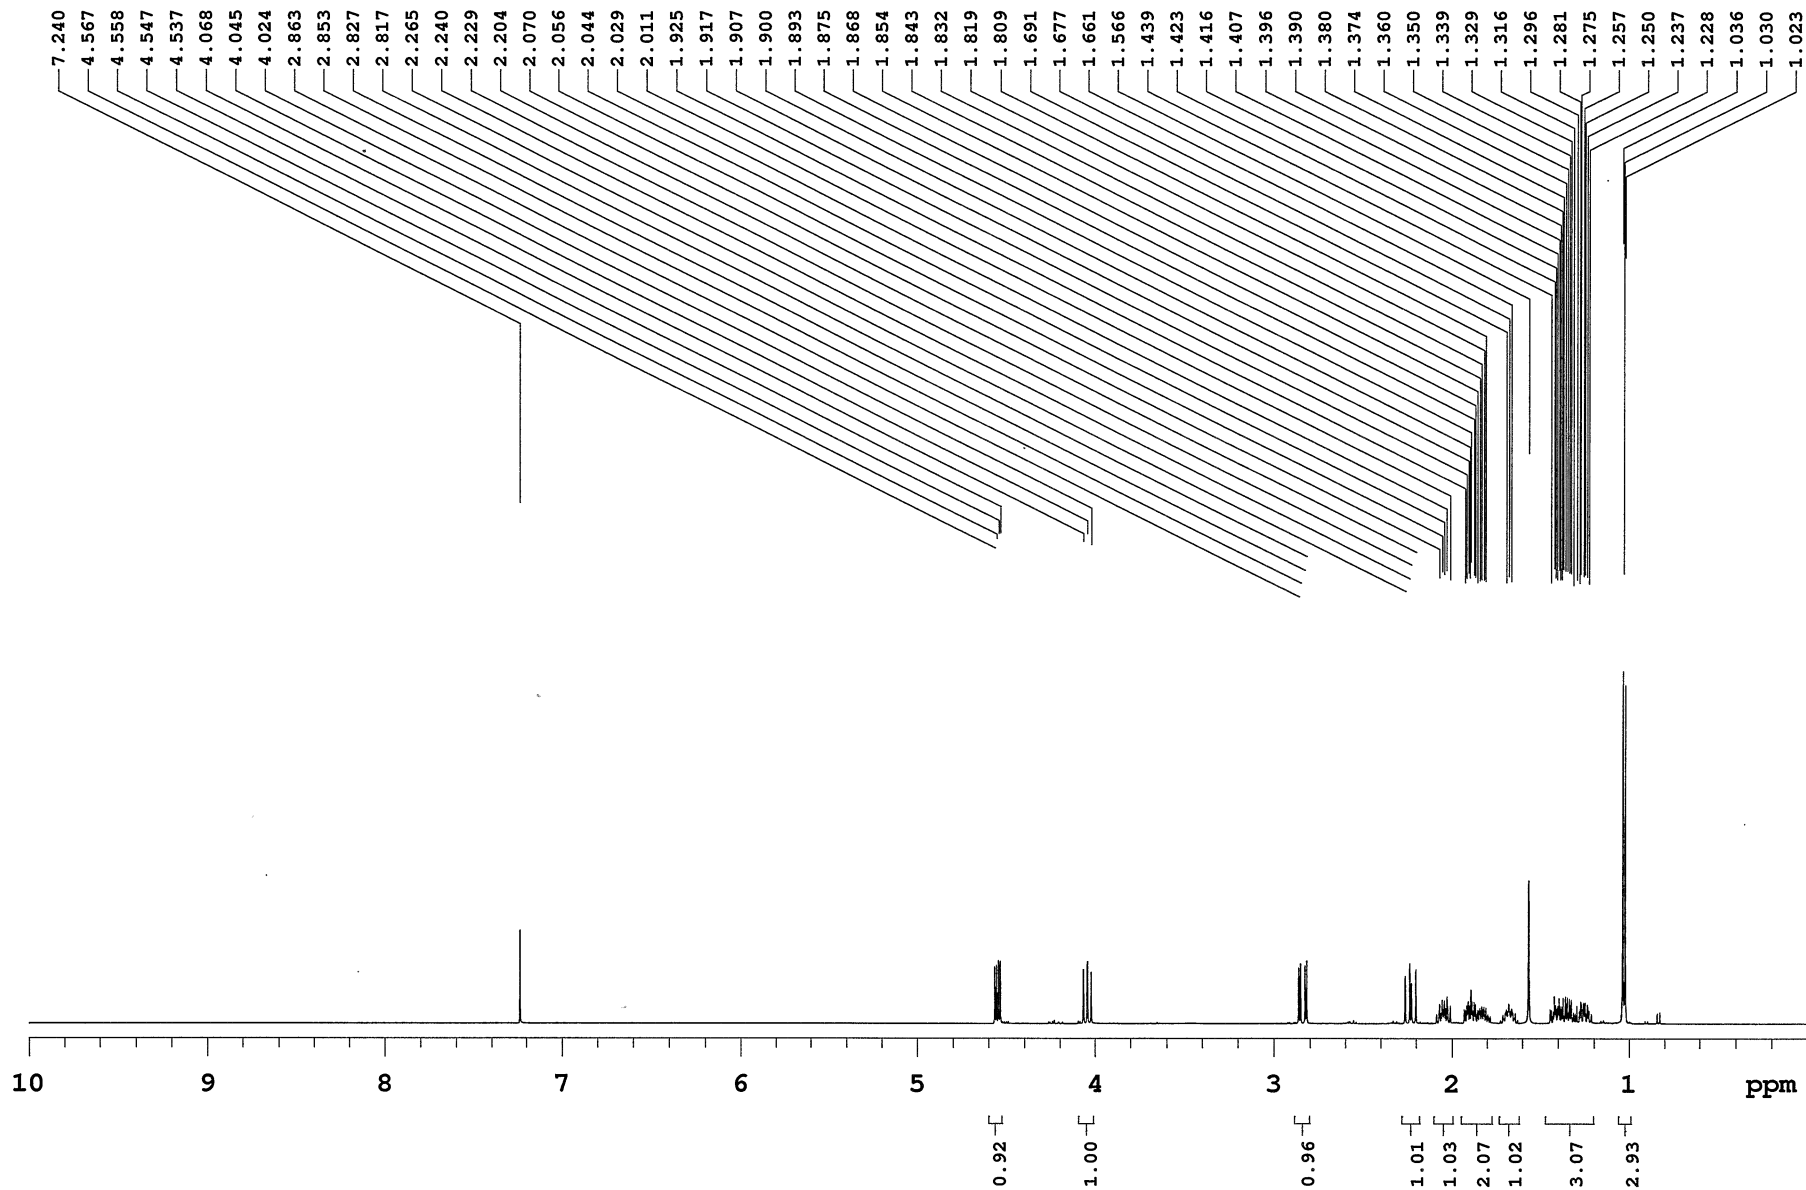

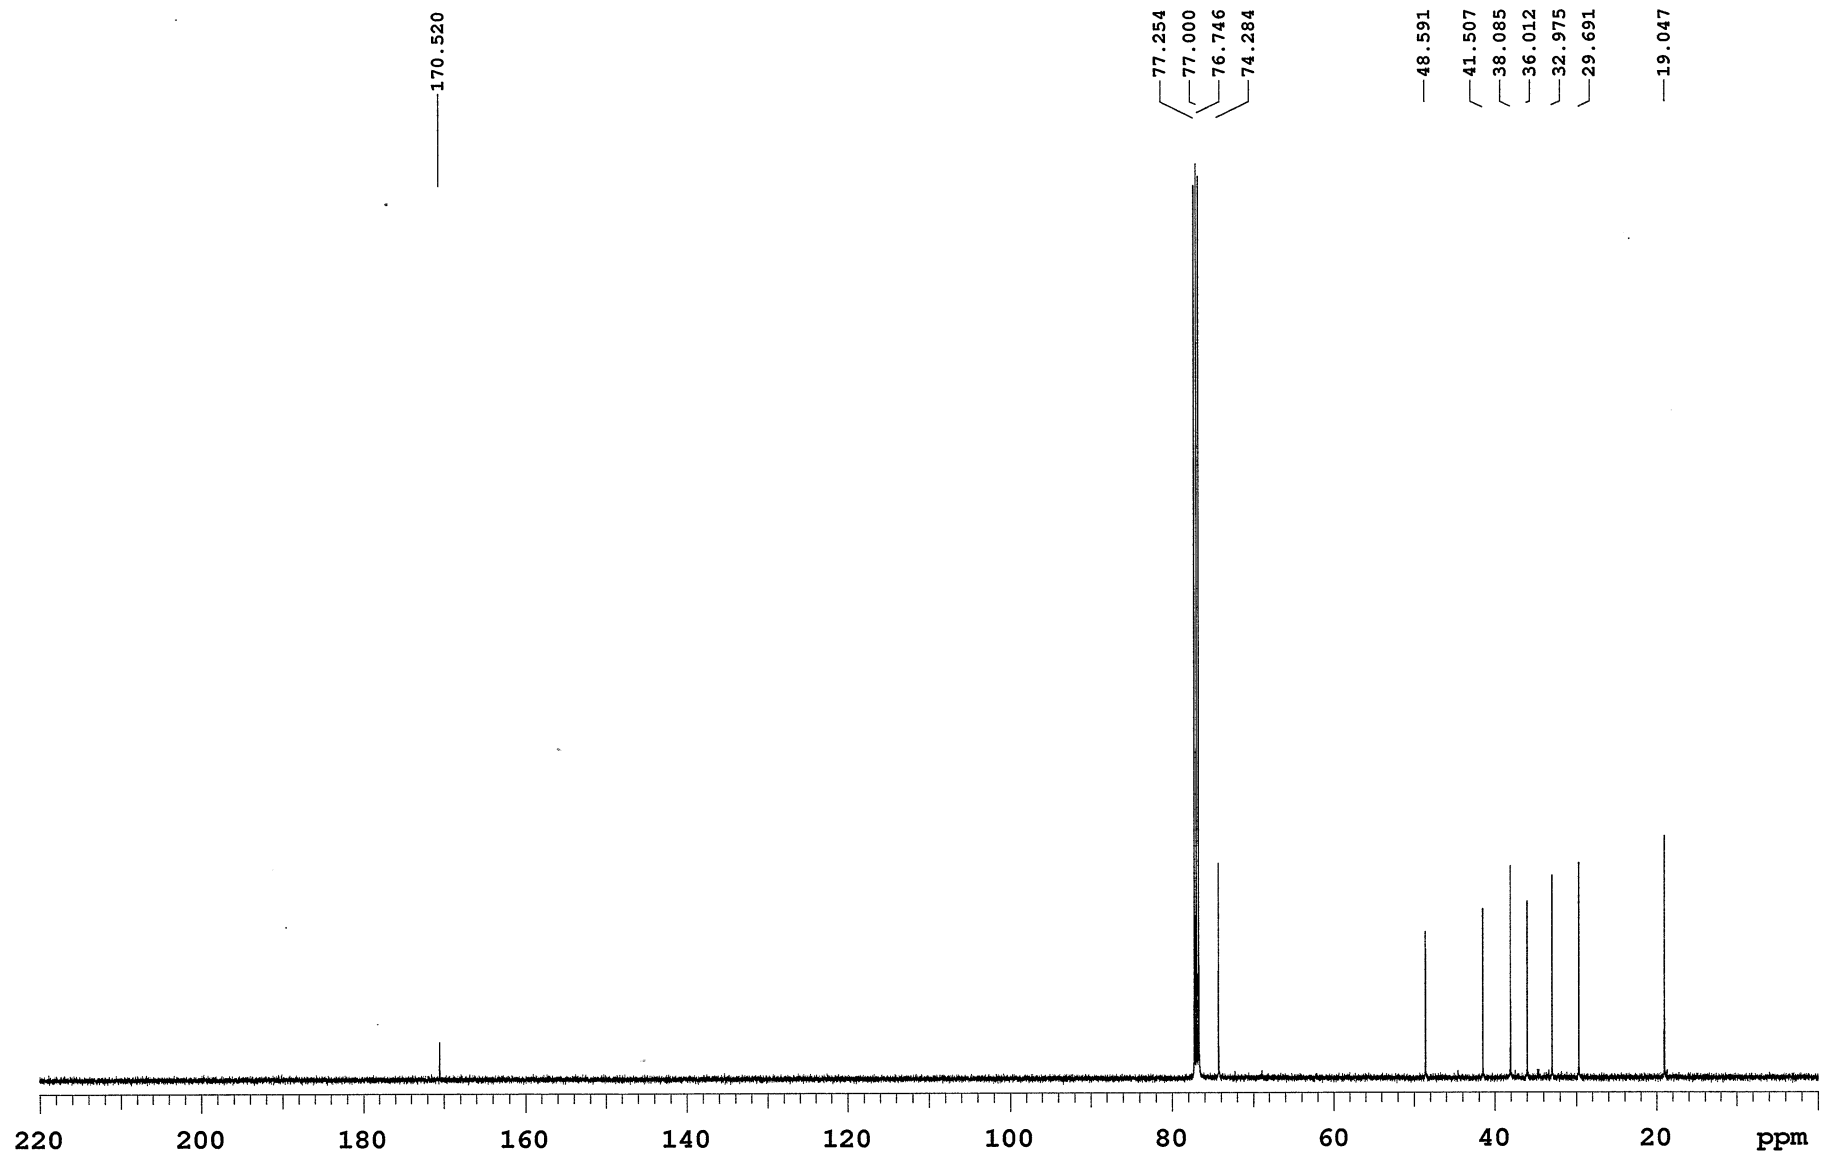

13C NMR (125 MHz, CDCl3) of compound 5



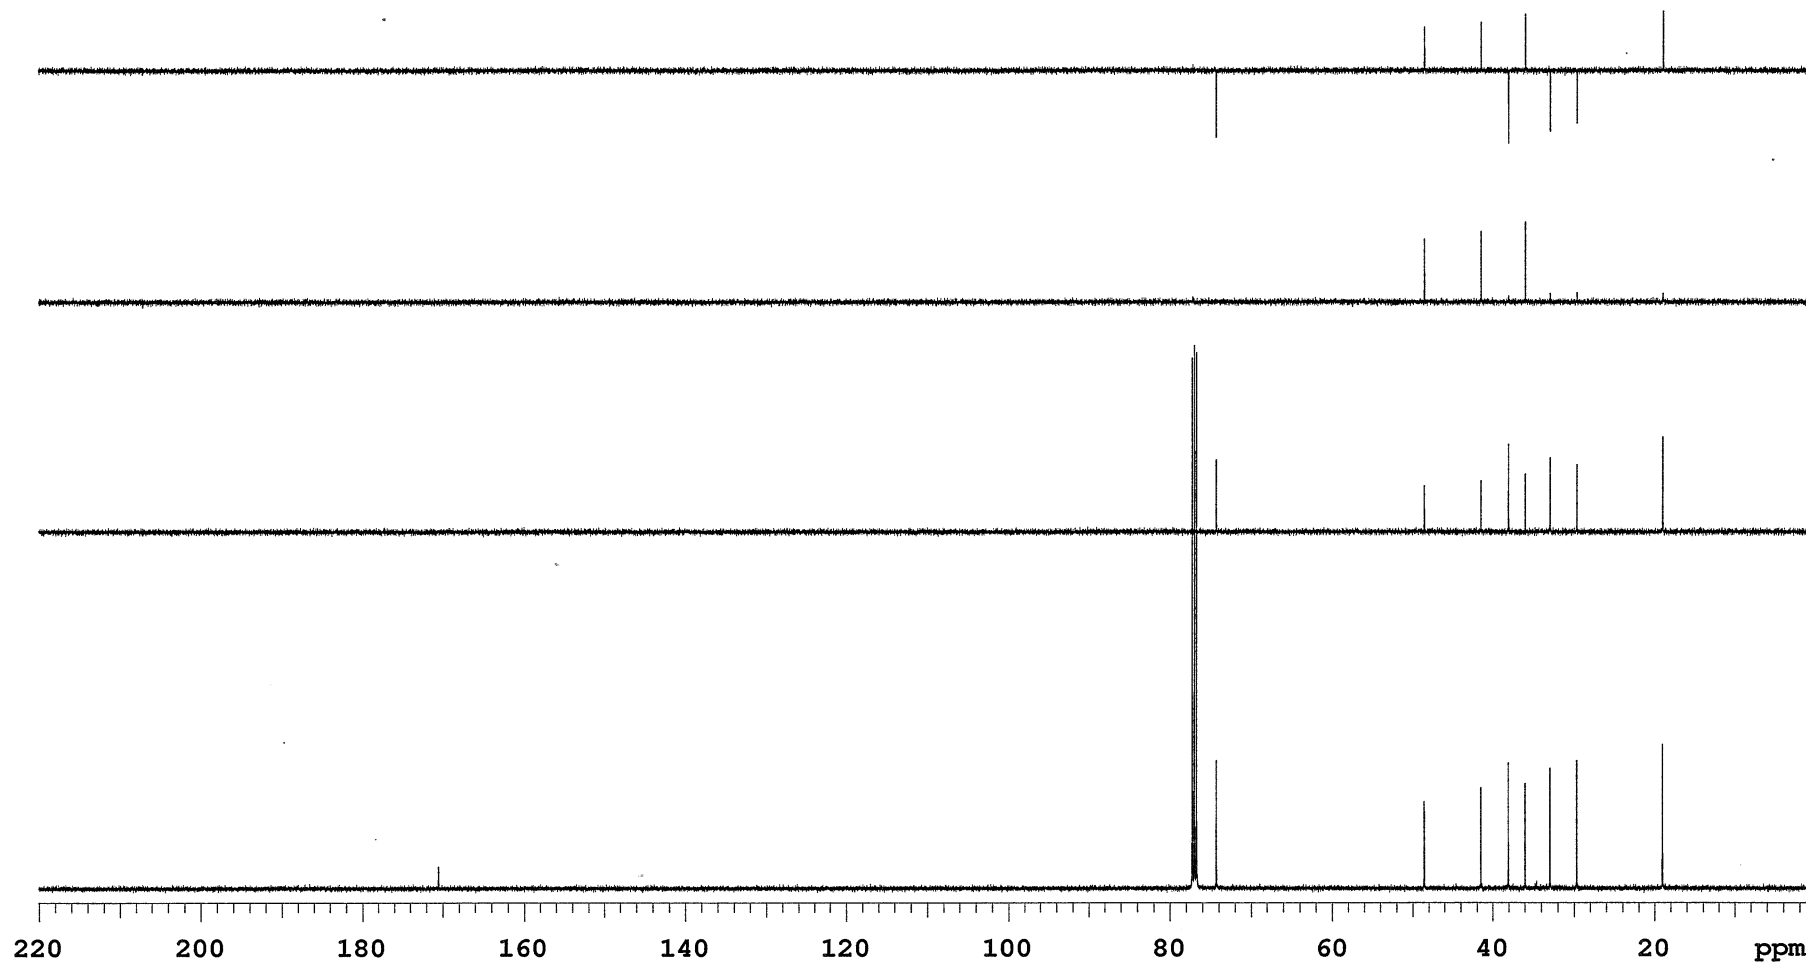

DEPT of compound 5

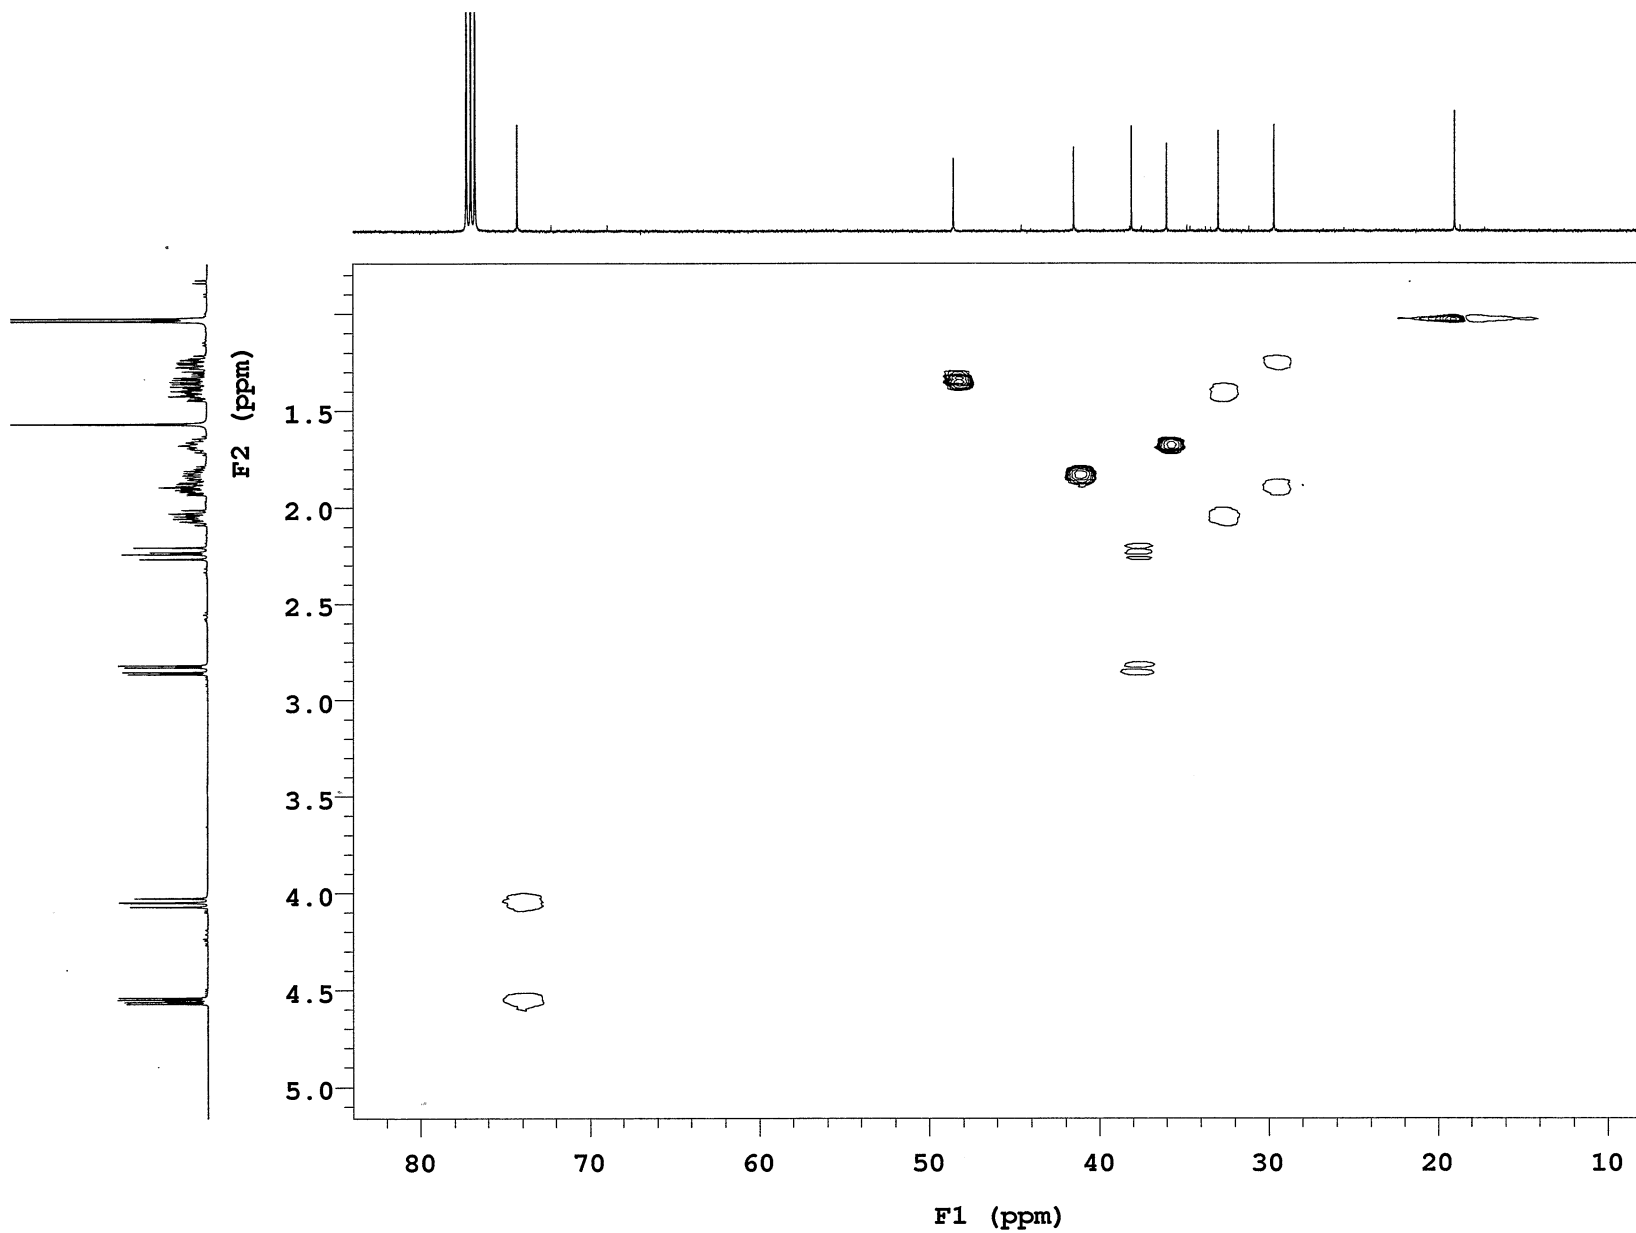

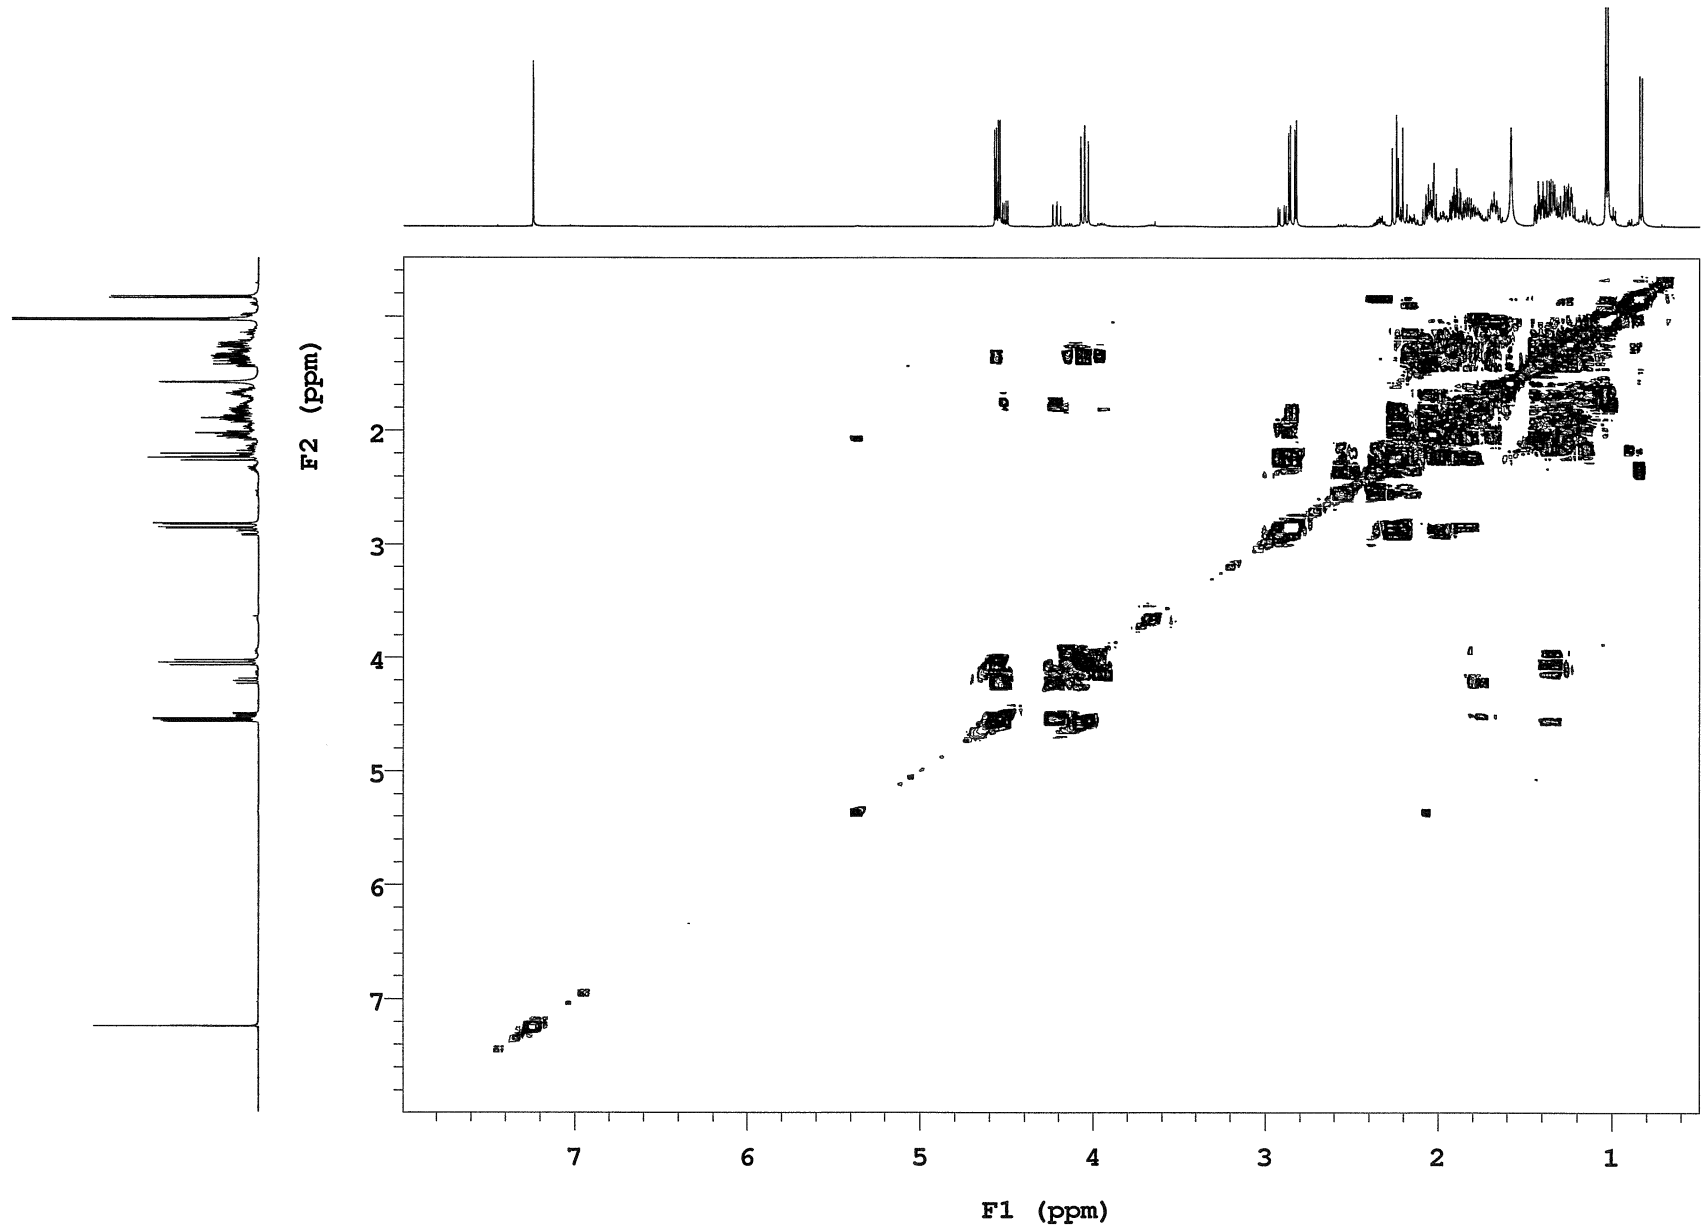

COSY of compound 5

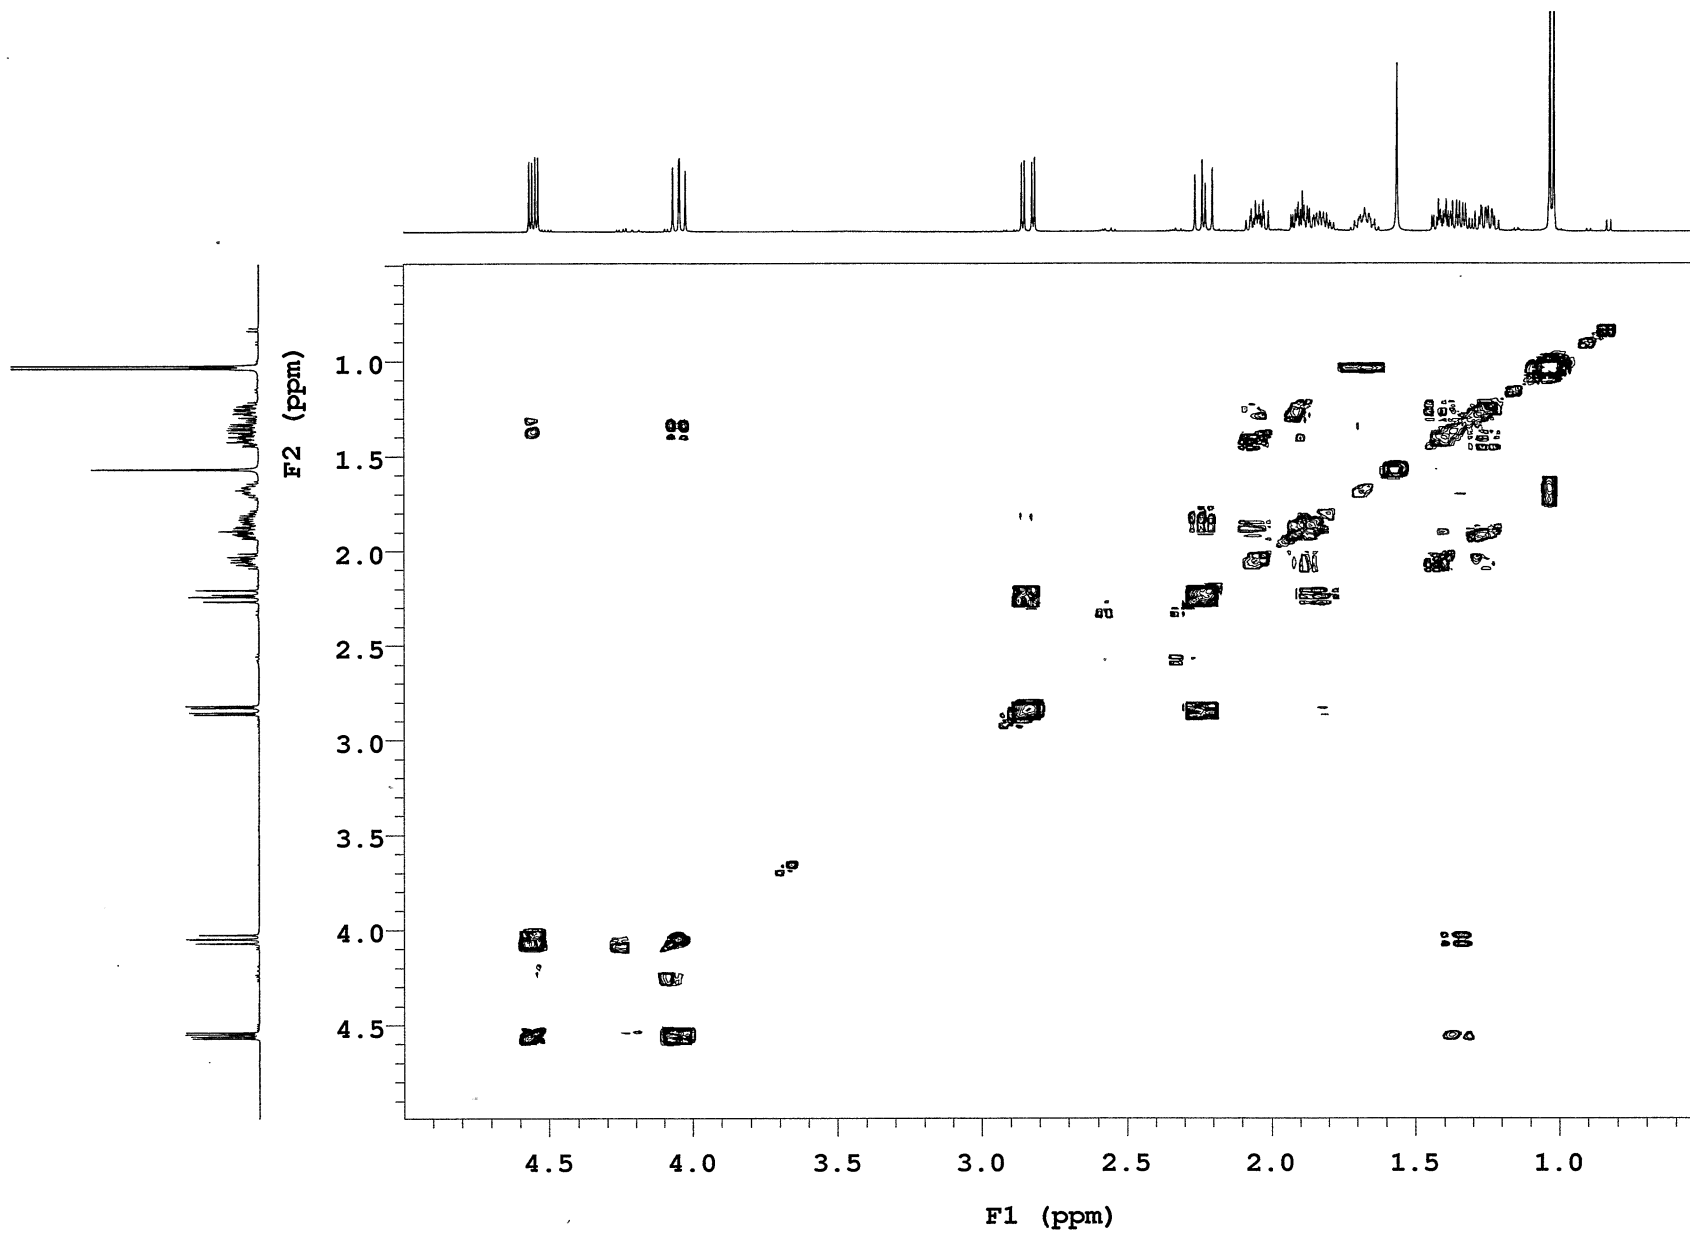

COSY of compound 5, expanded

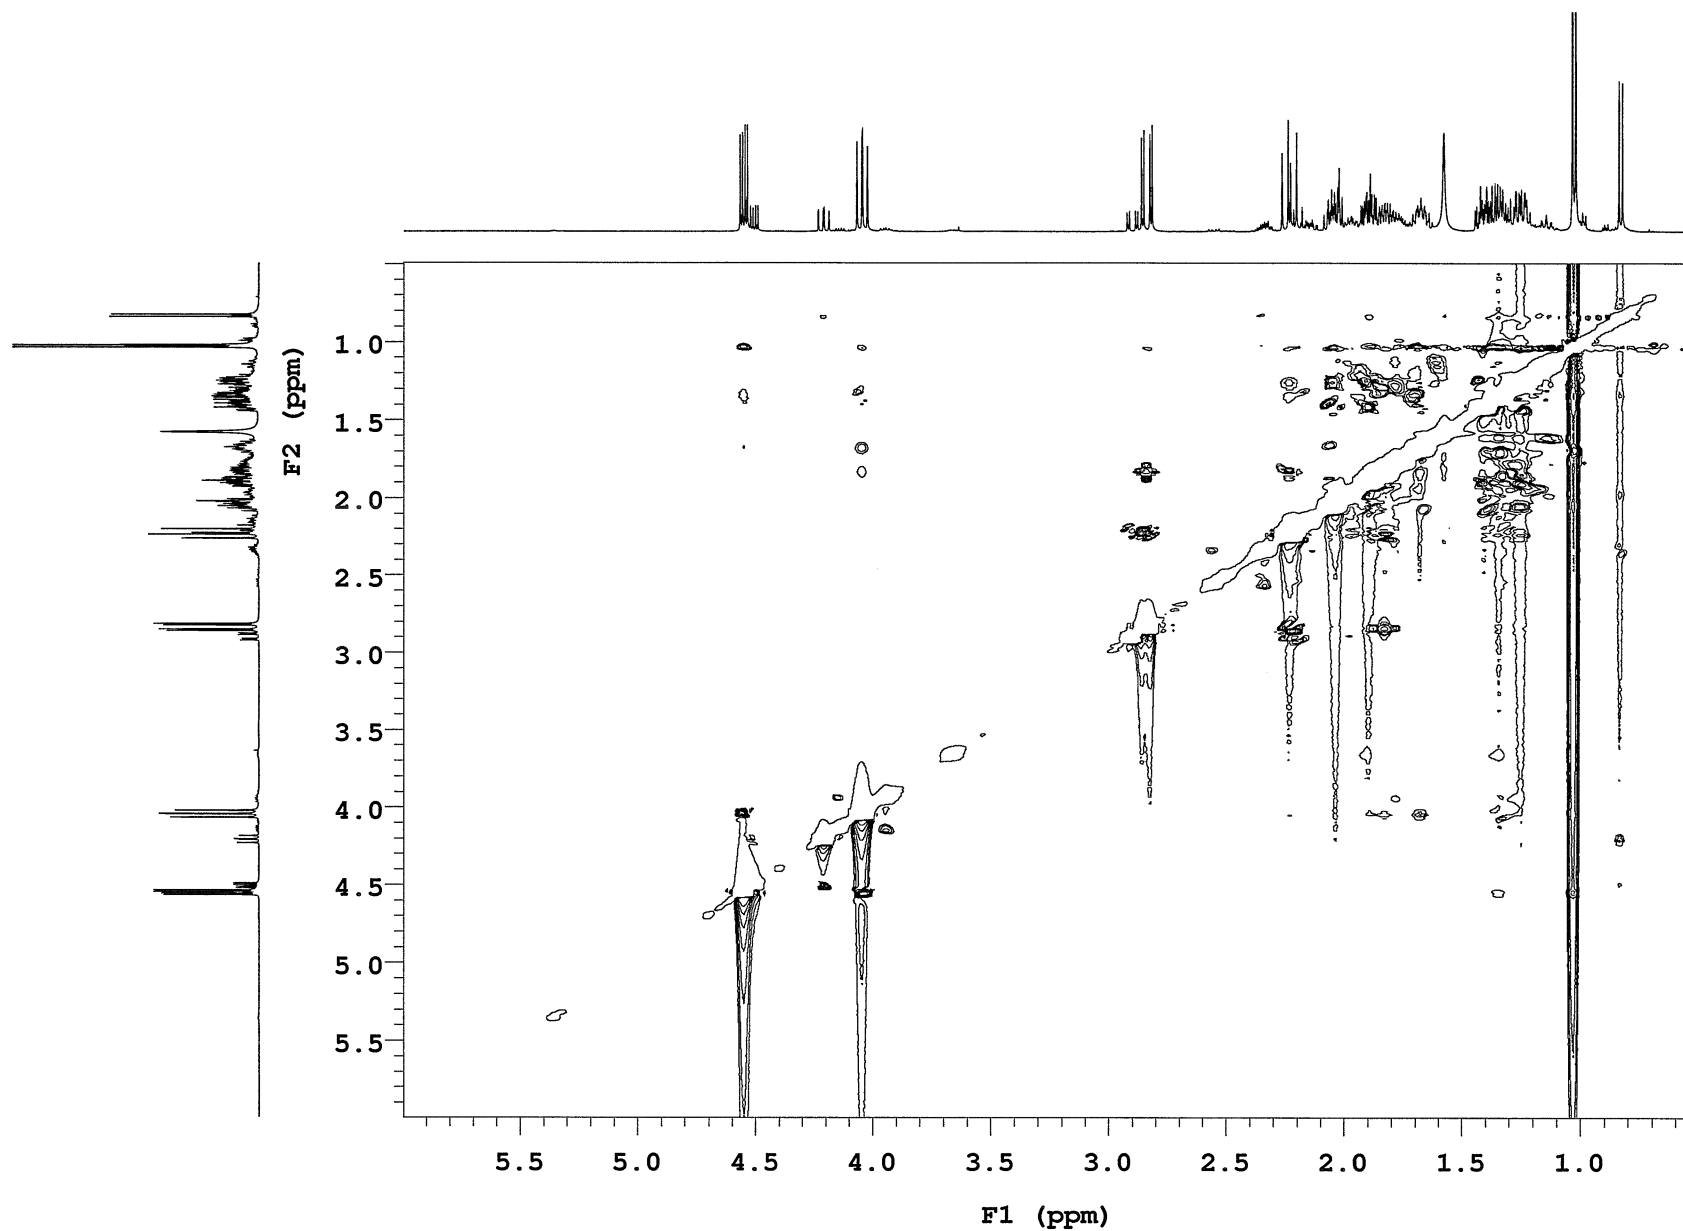

NOESY of compound 5

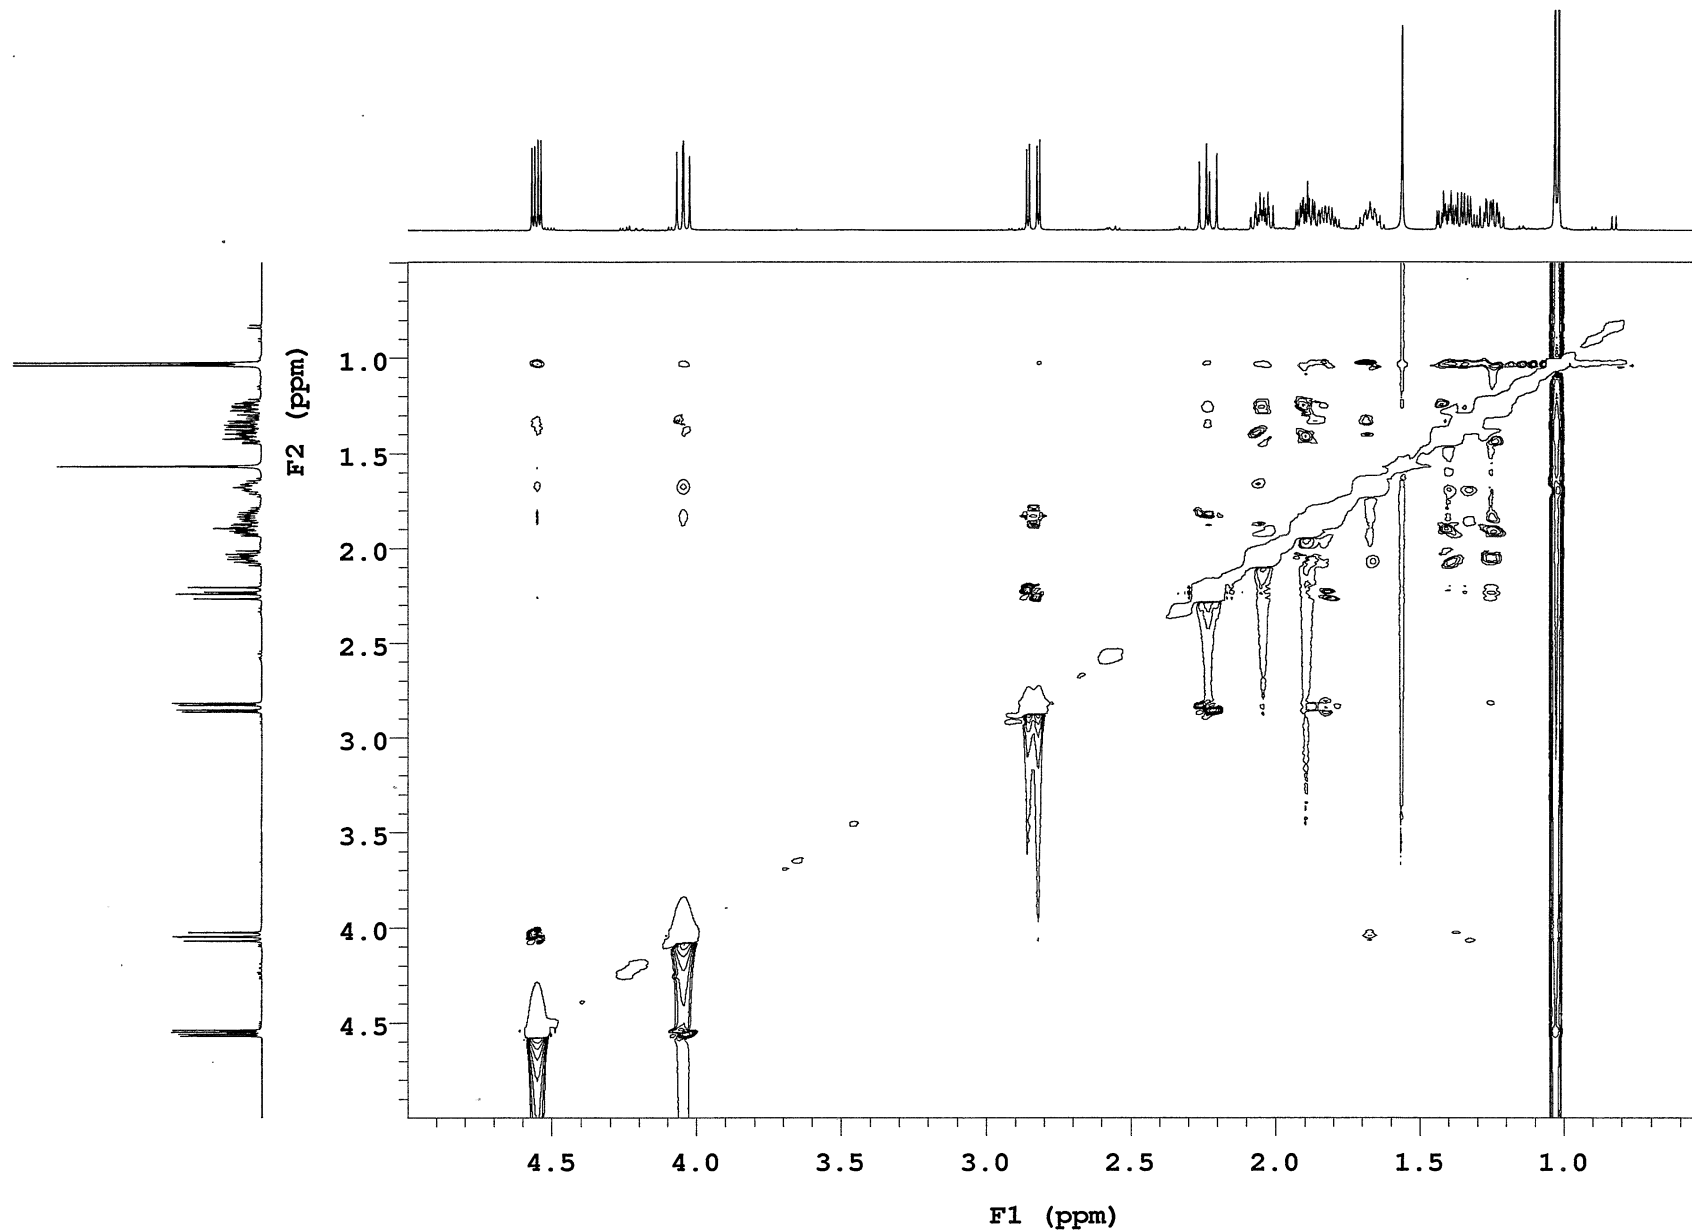

NOESY of compound 5, expanded

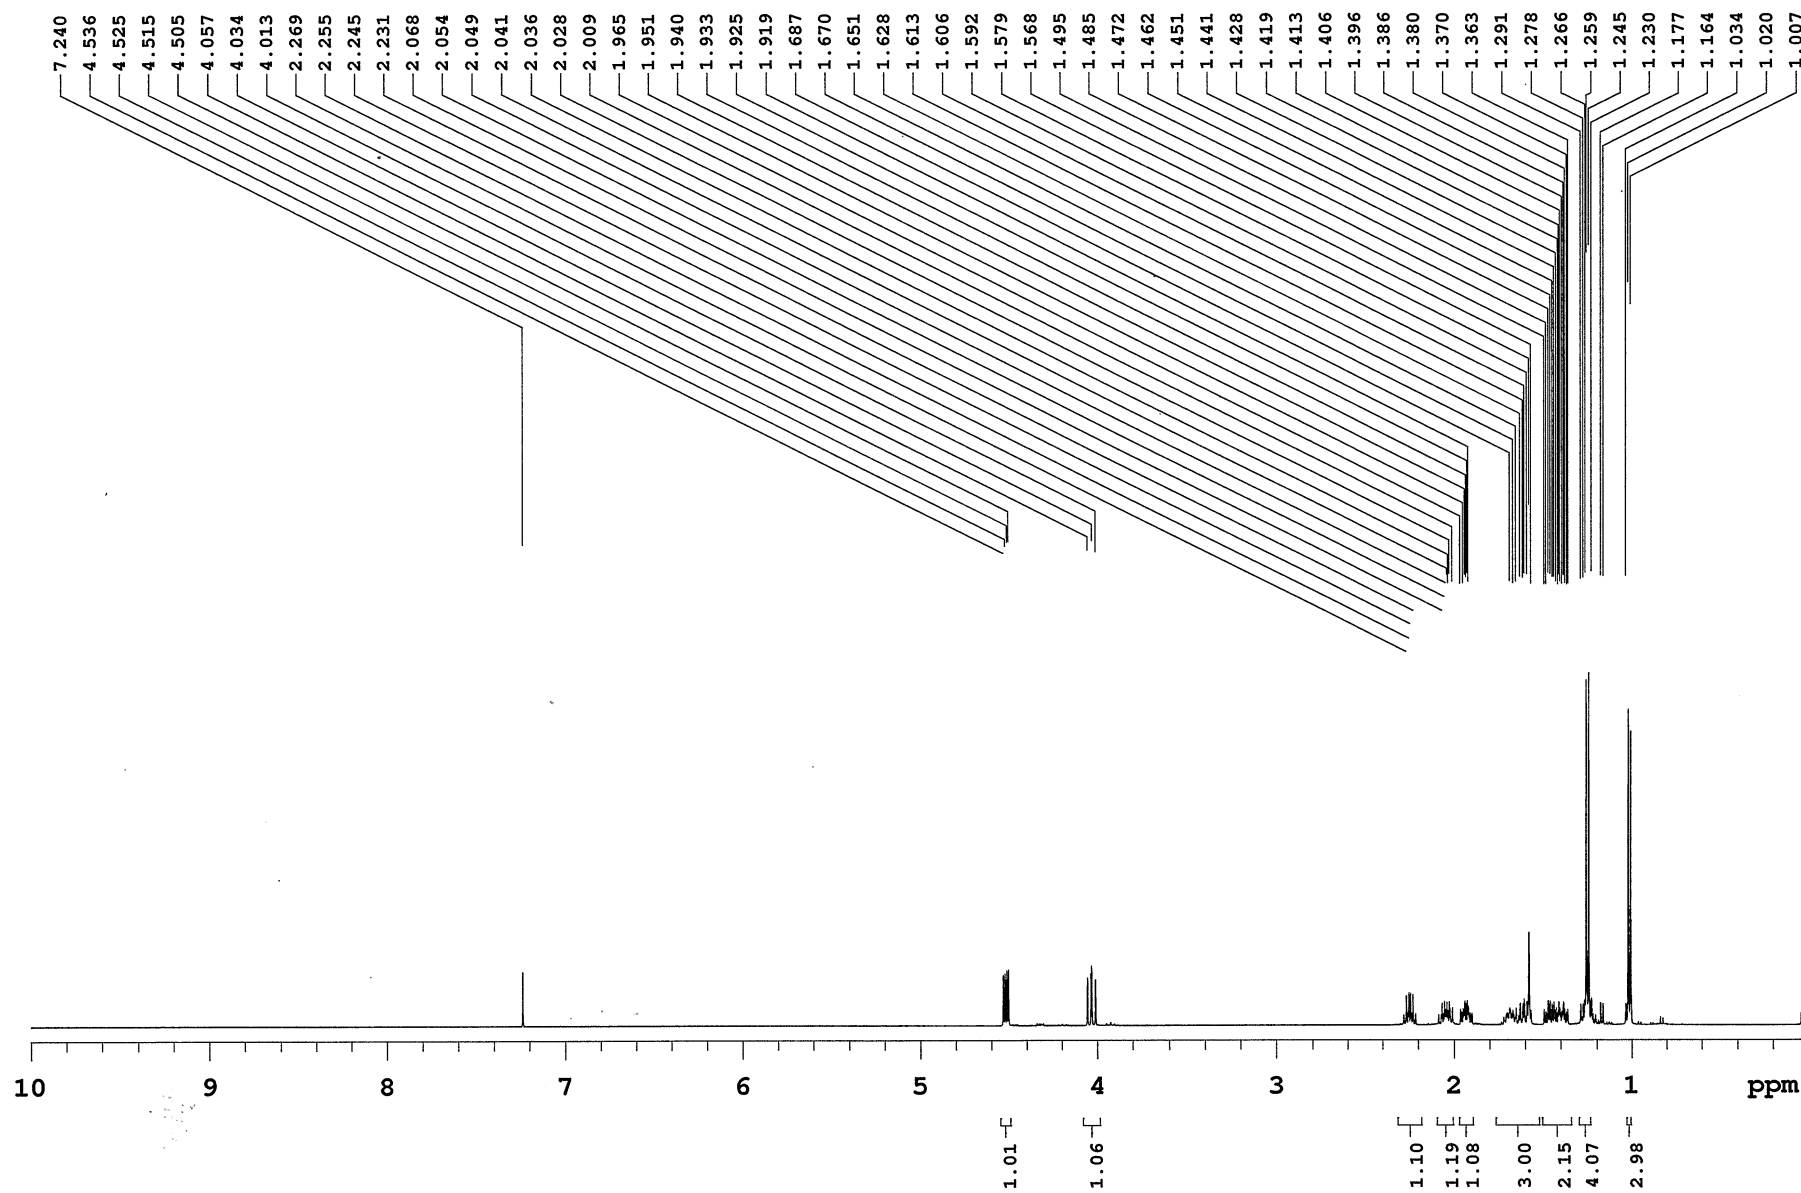

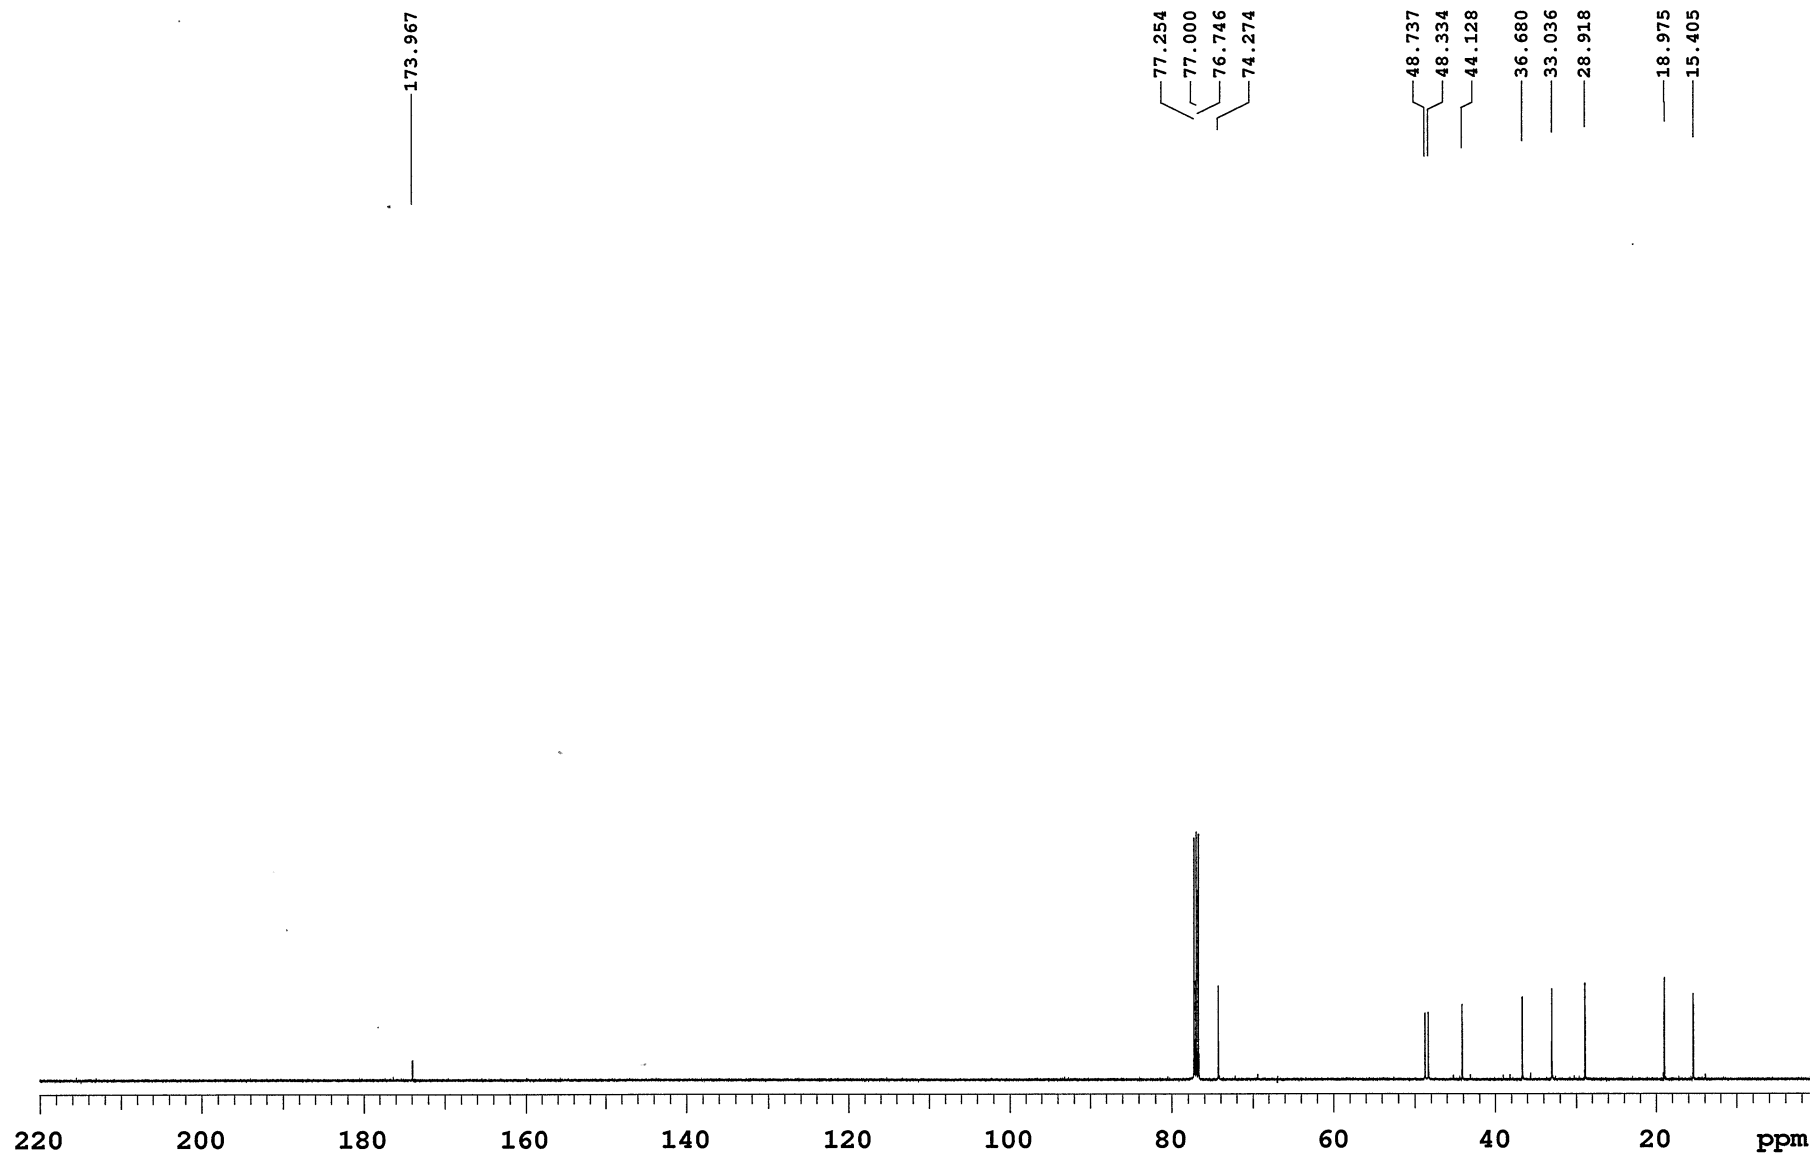

13C NMR (125 MHz, CDCl3) of compound 6



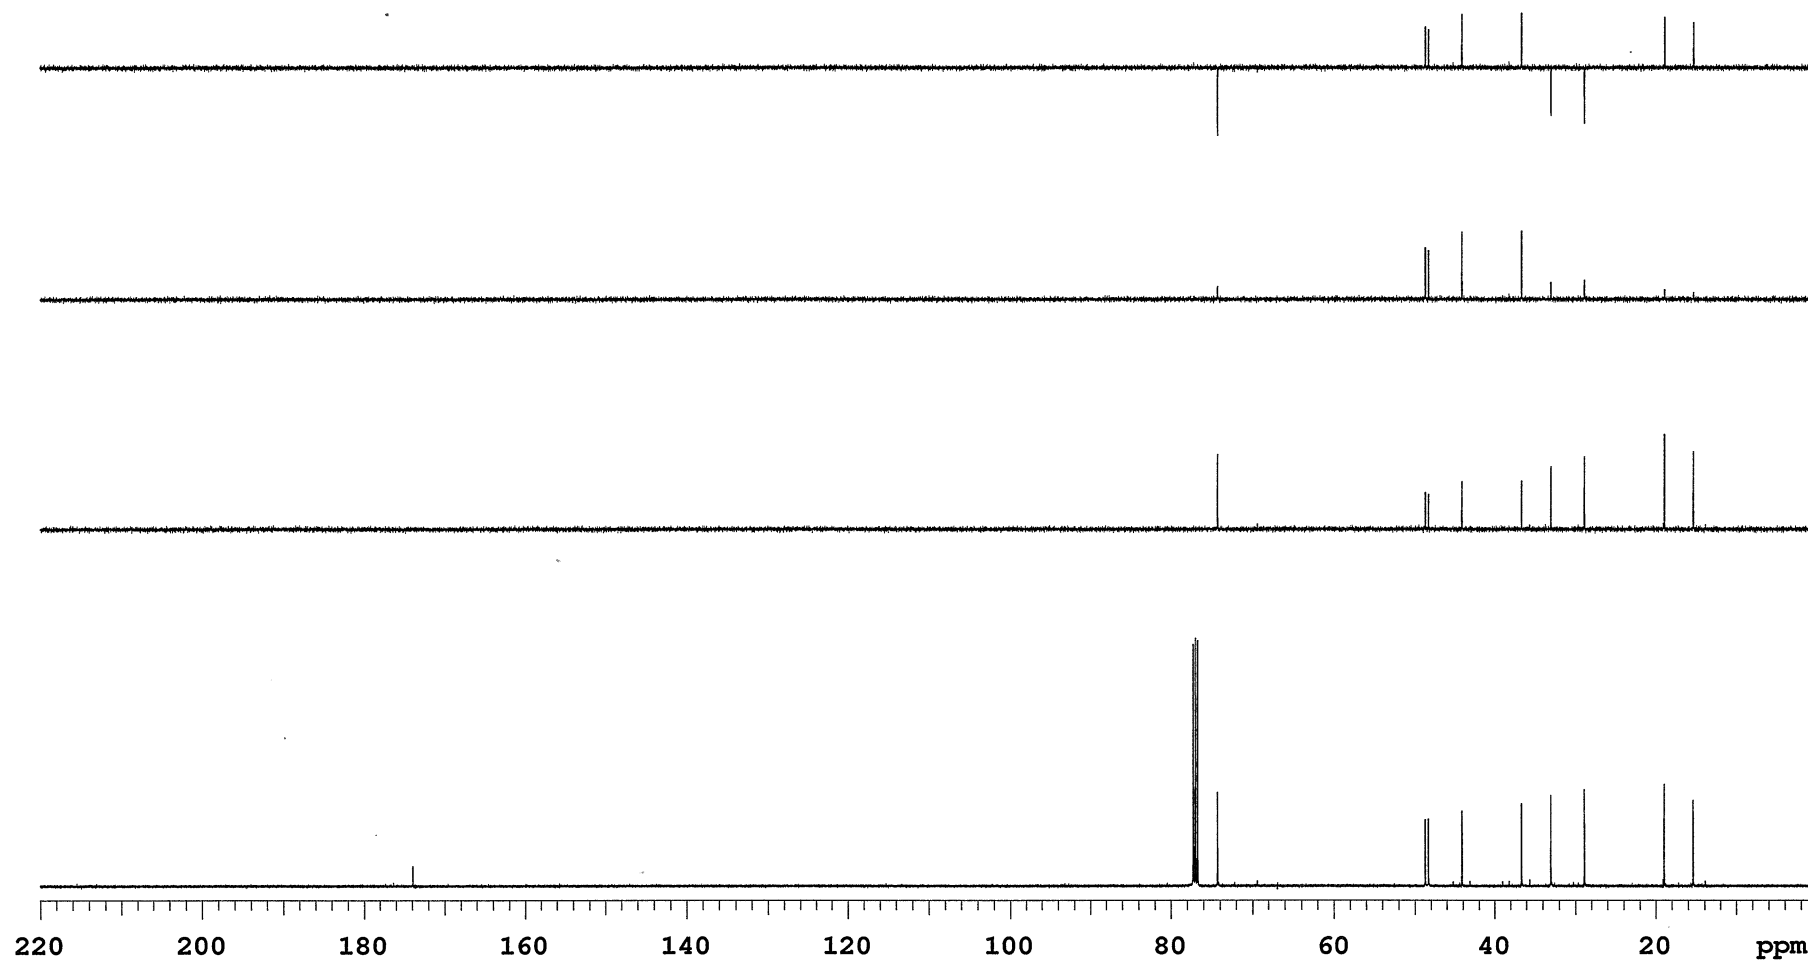

DEPT of compound 6

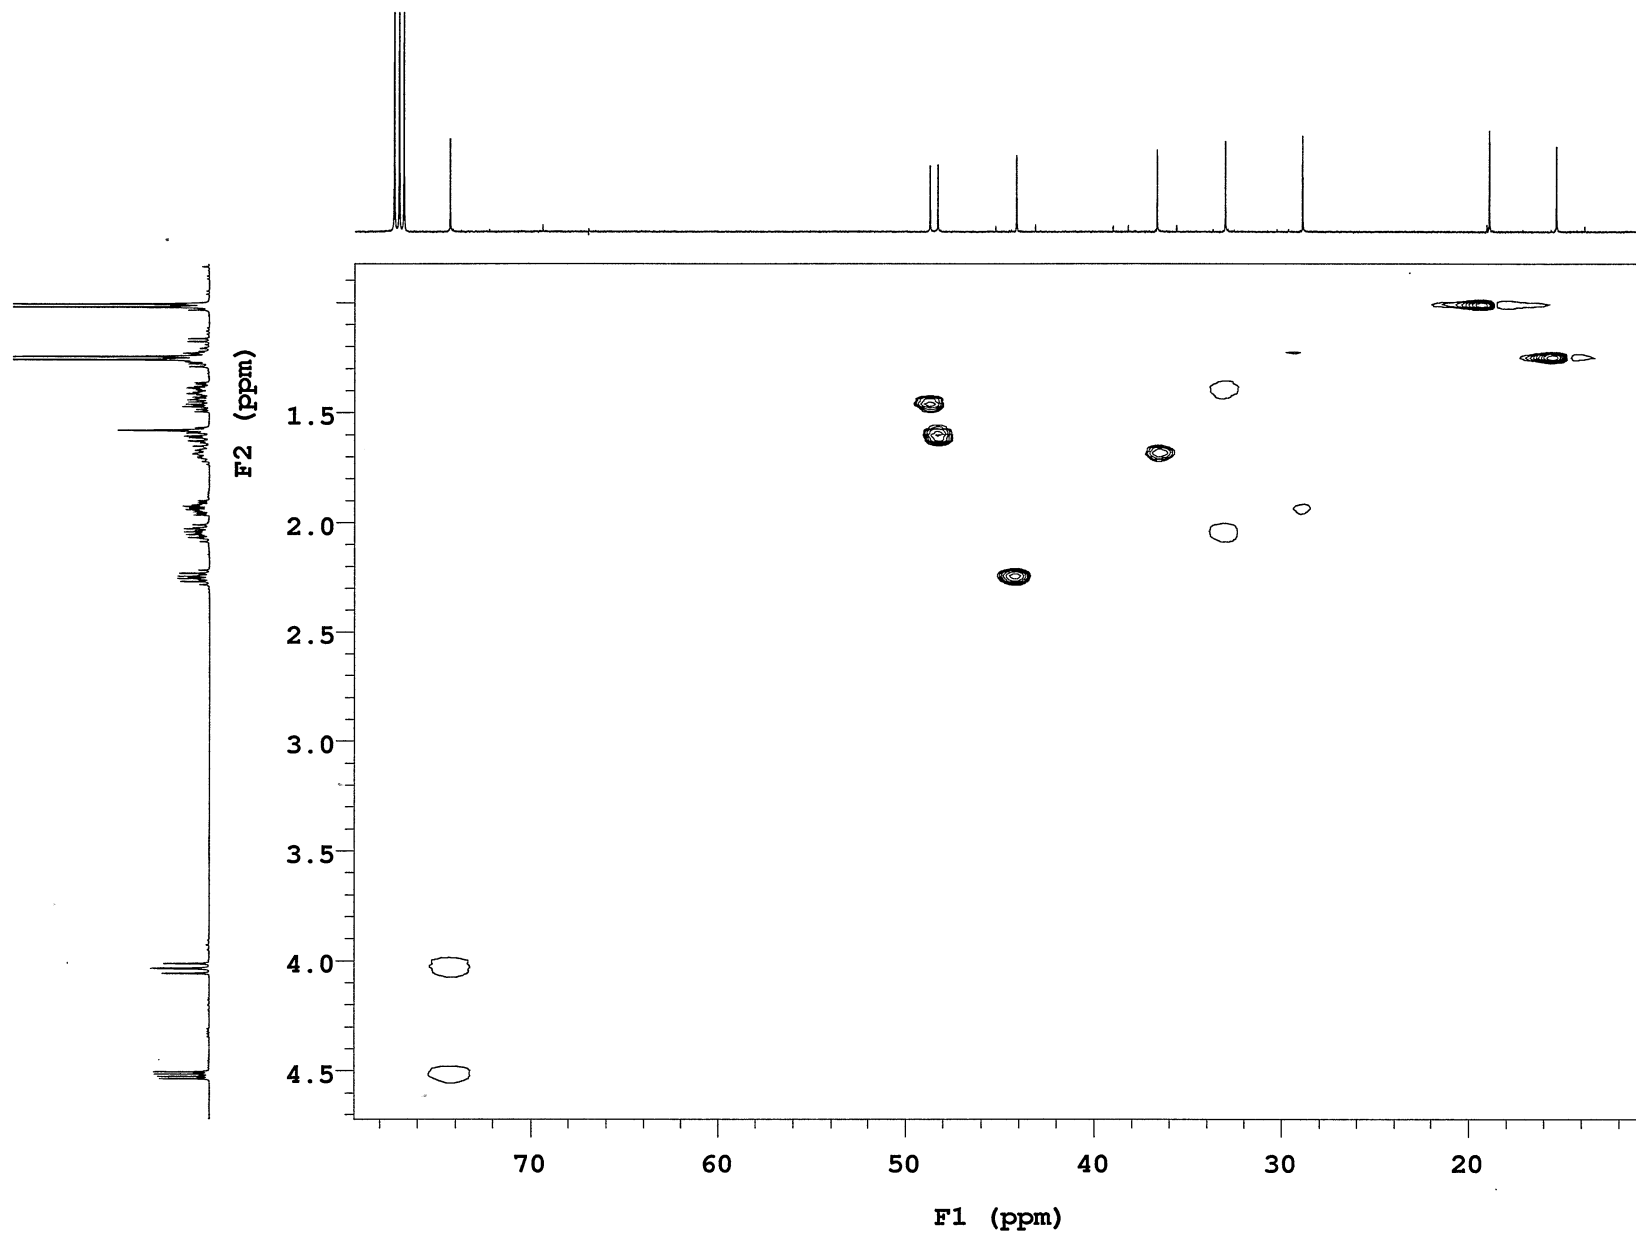

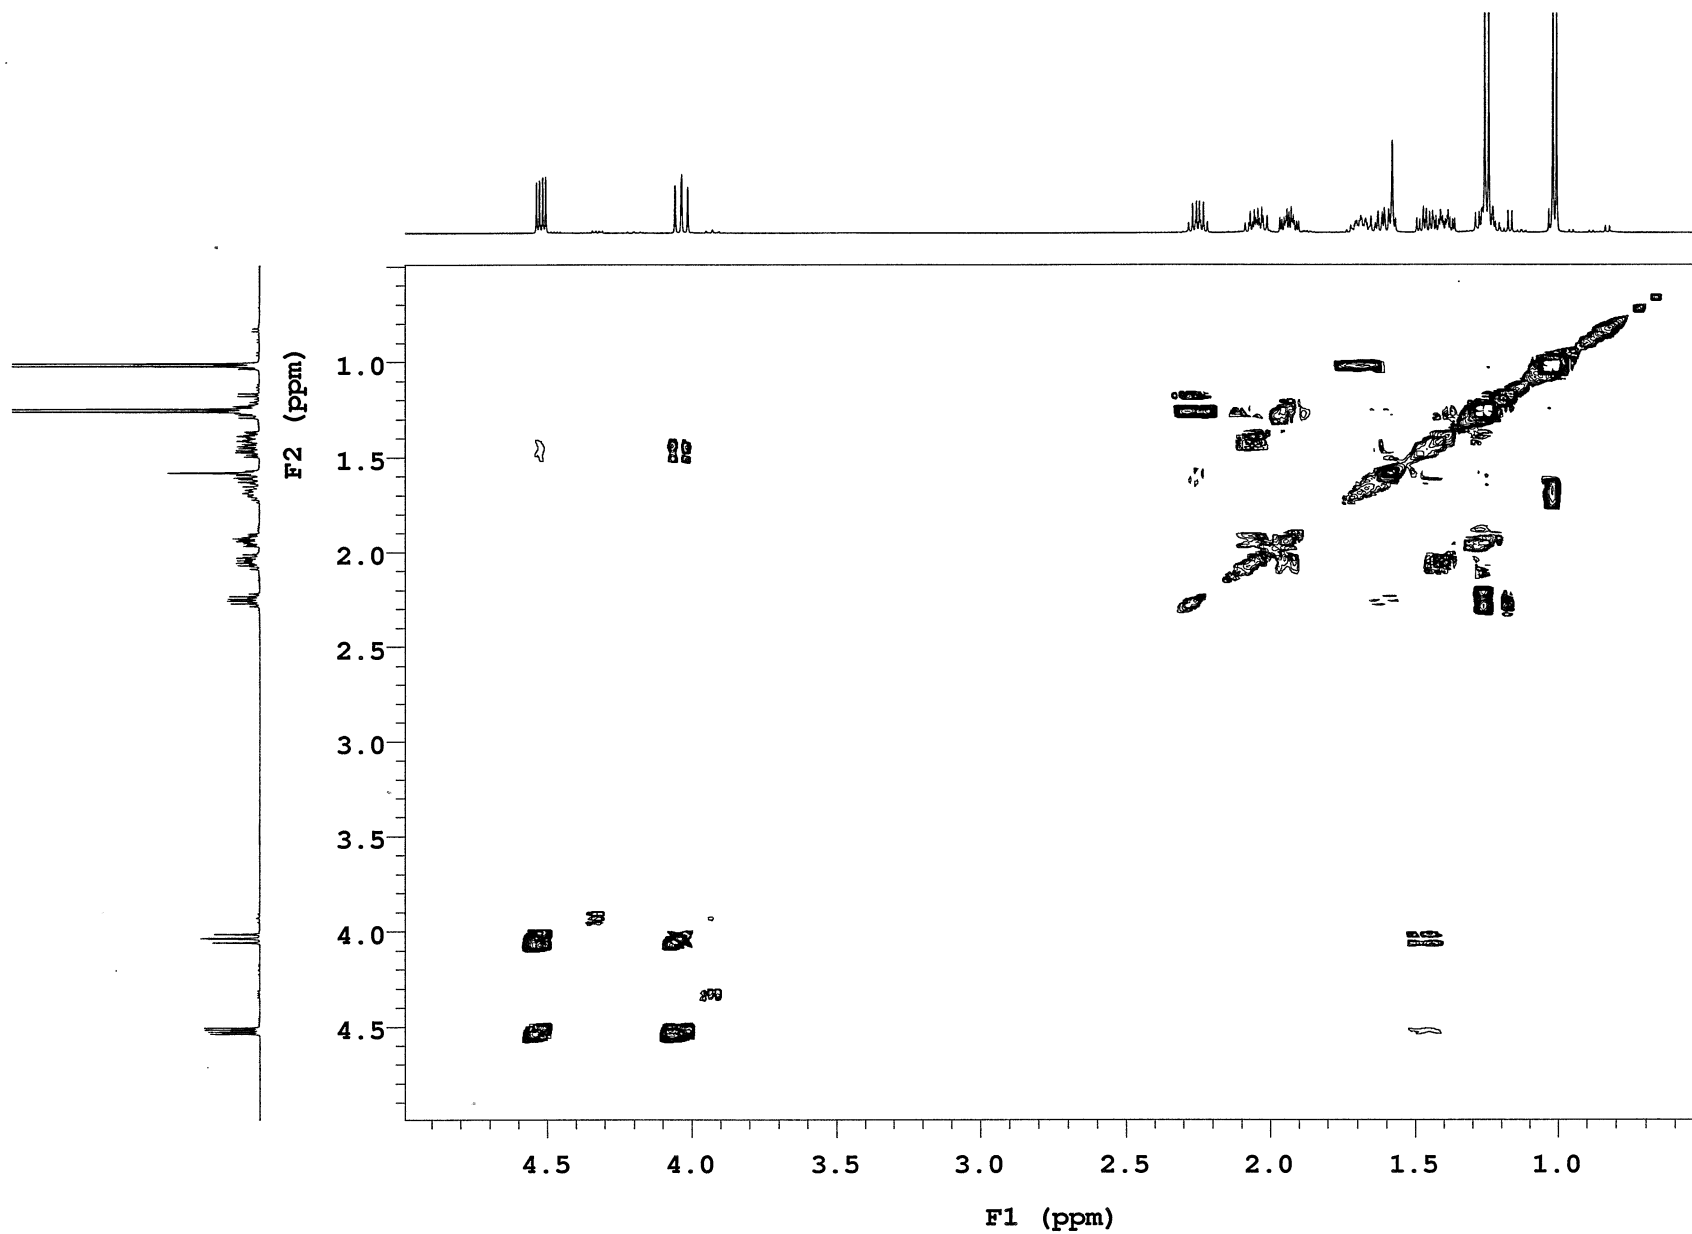

COSY of compound 6

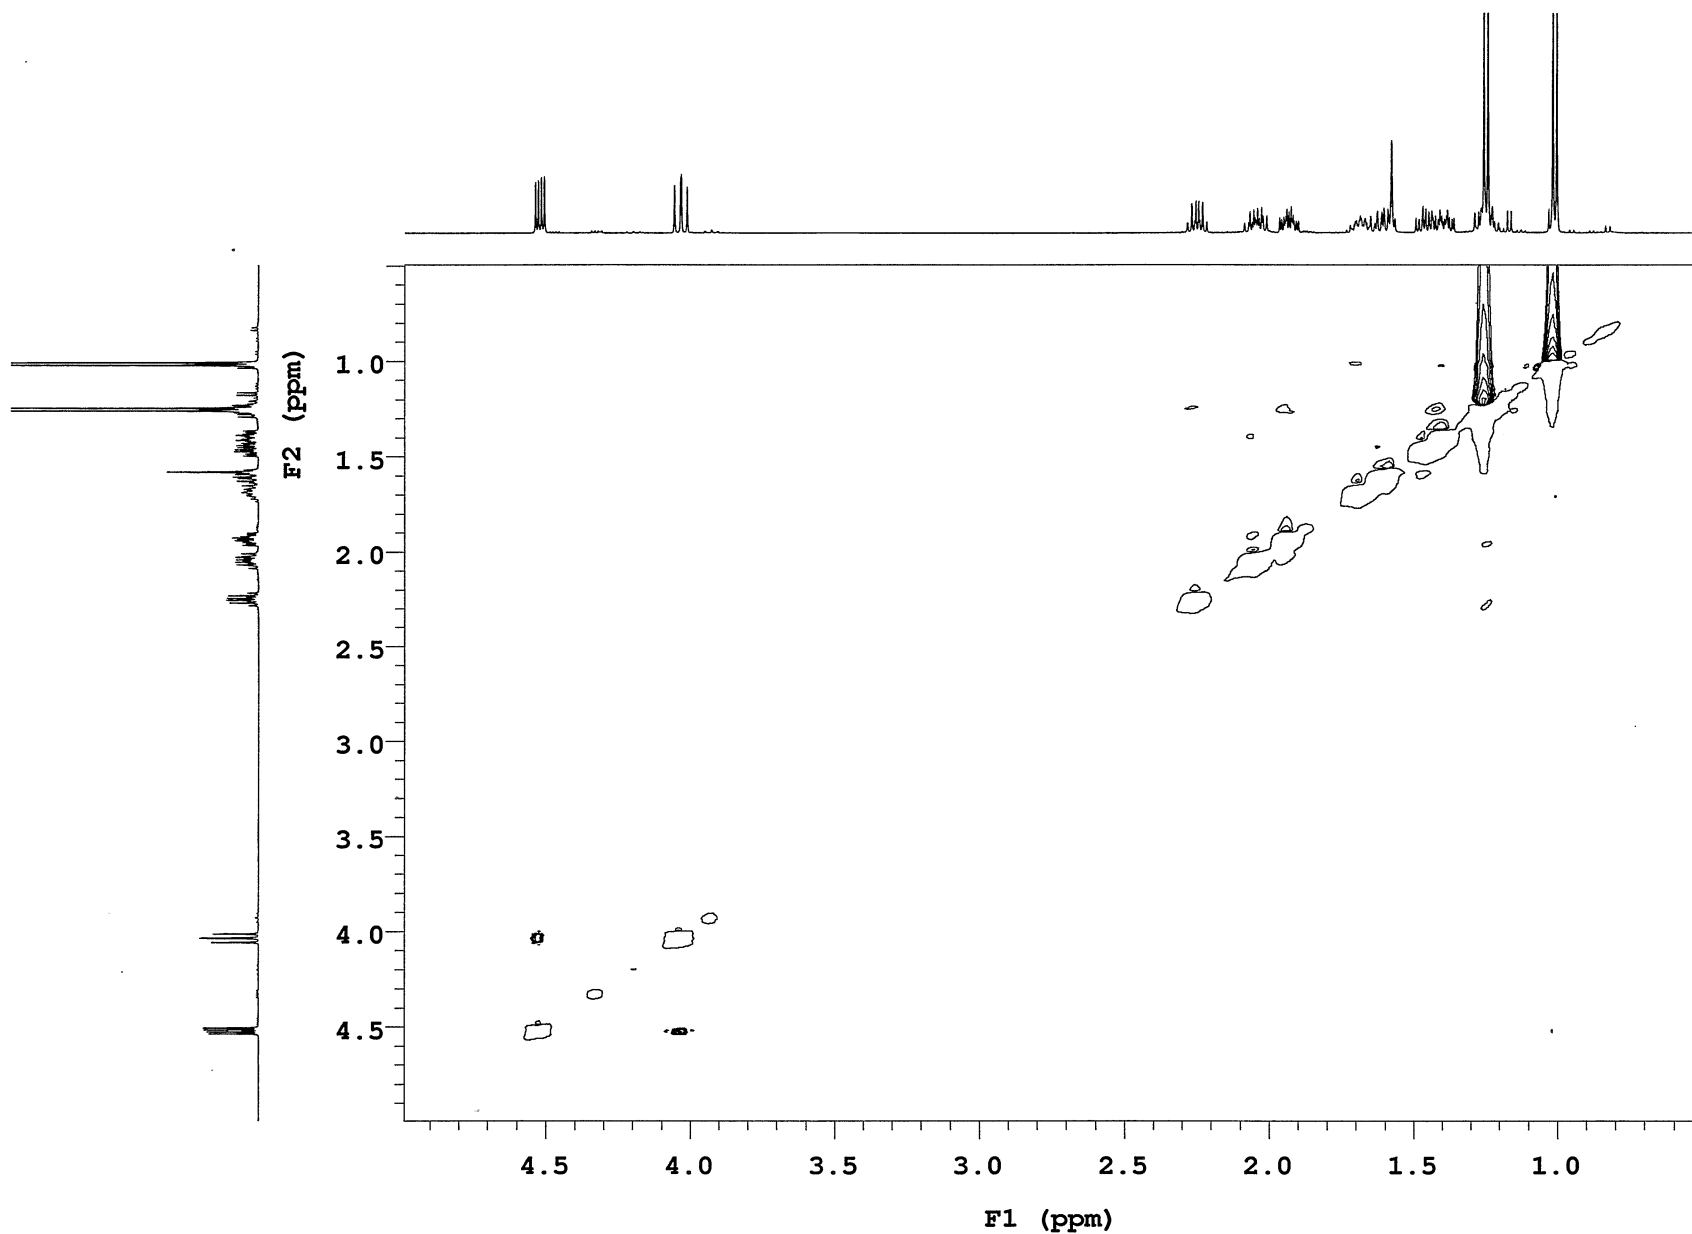

NOESY of compound 6

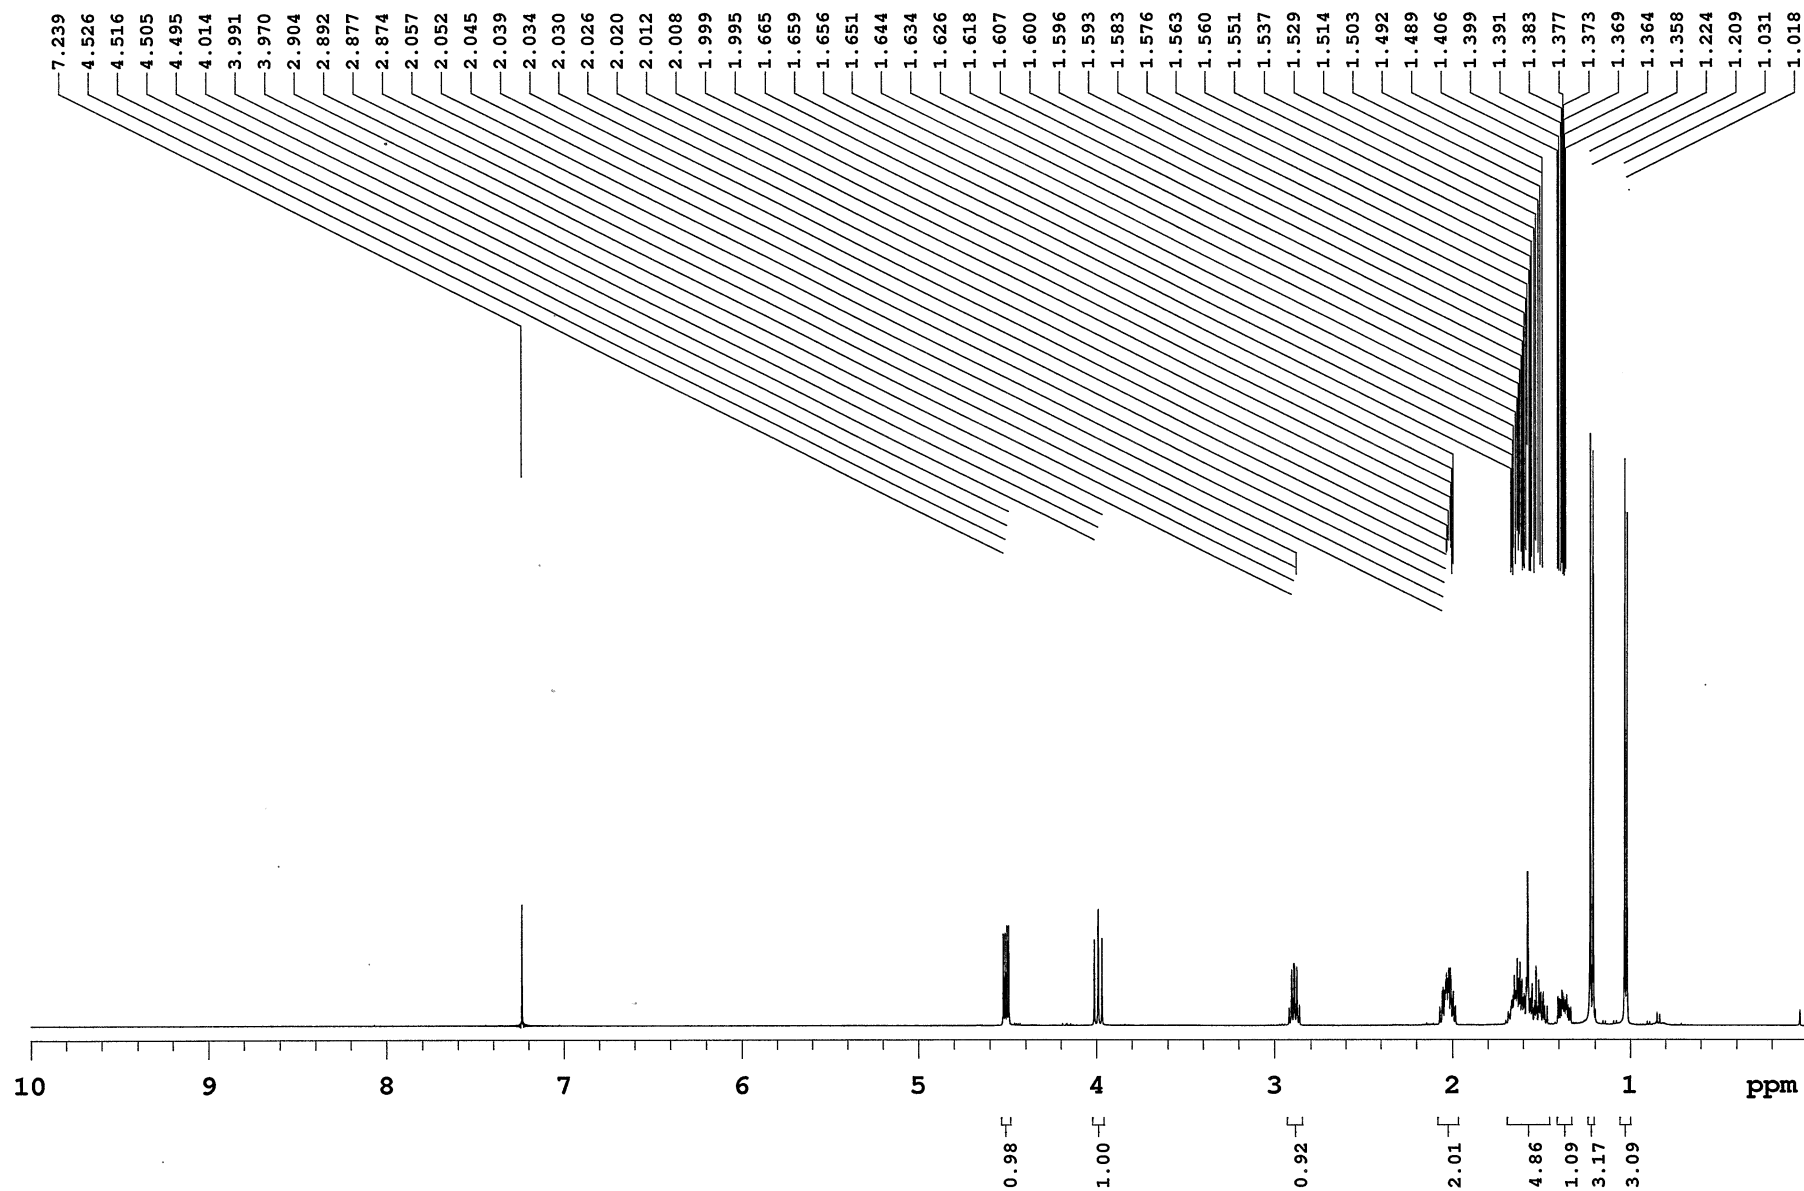

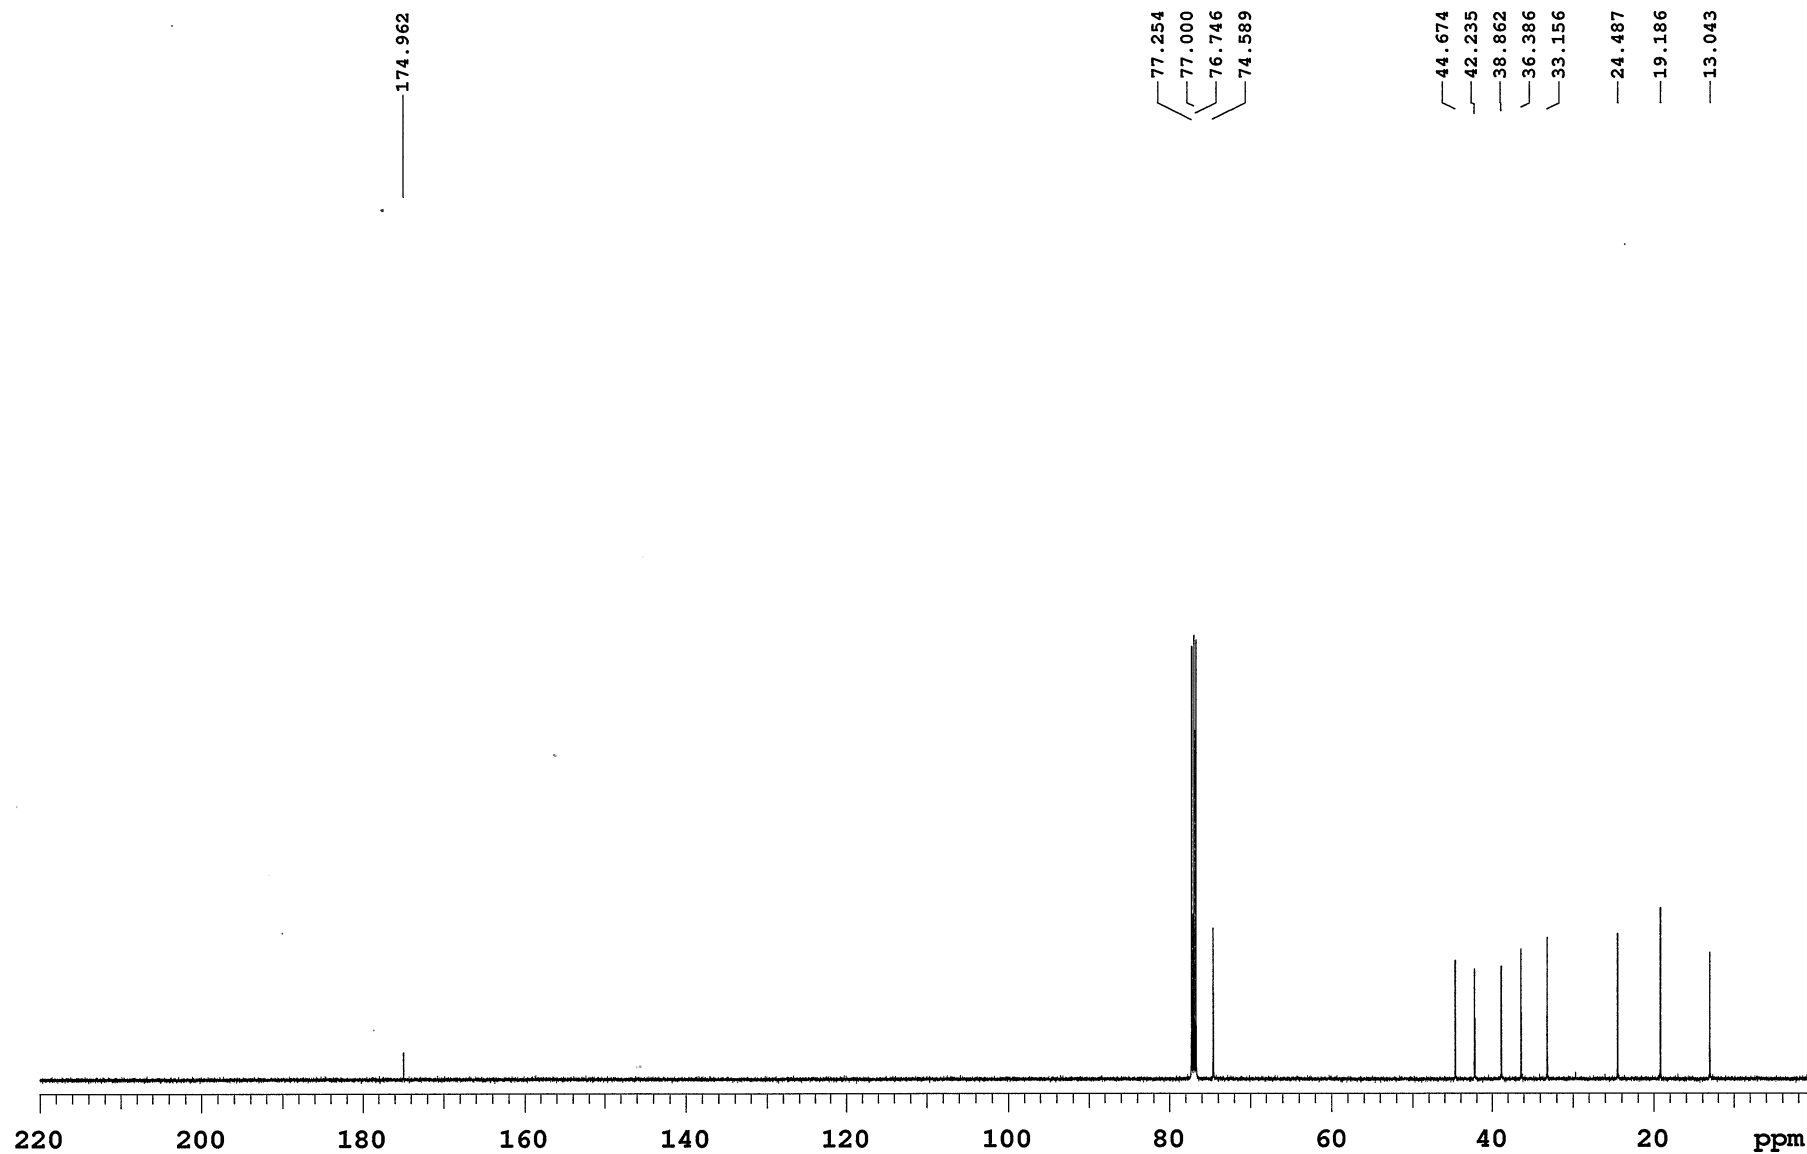13C NMR (125 MHz, CDCl<sub>3</sub>) of compound 7

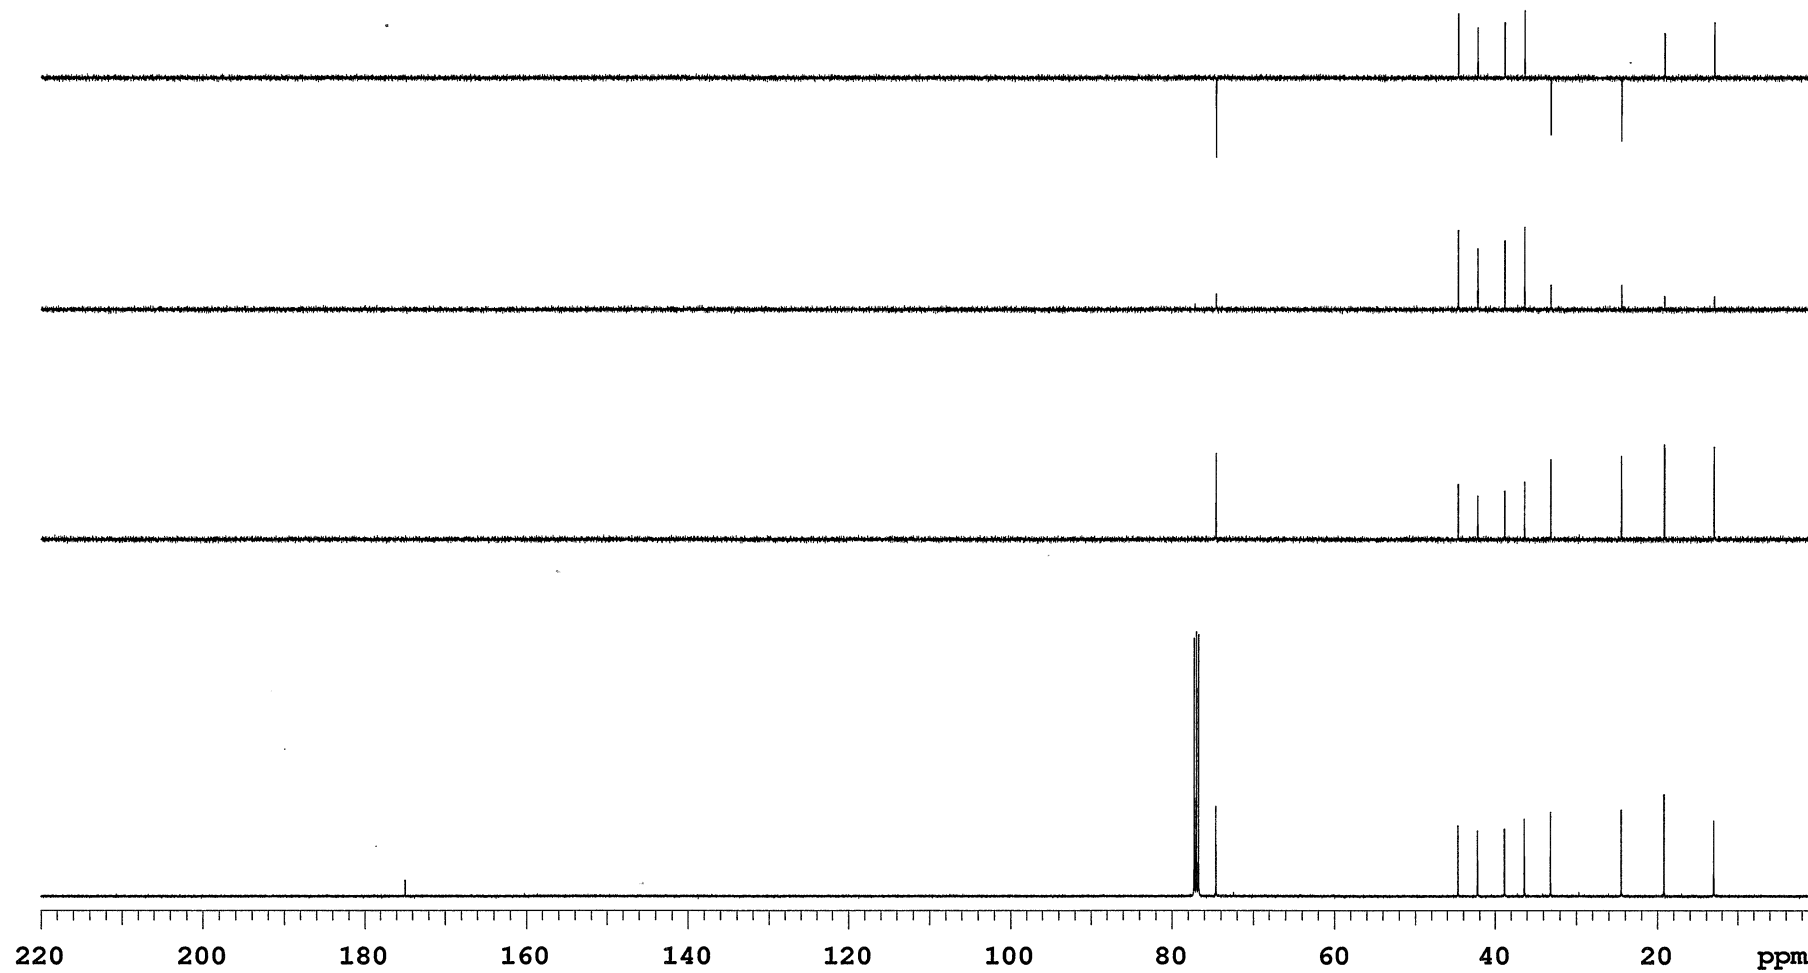

DEPT of compound 7

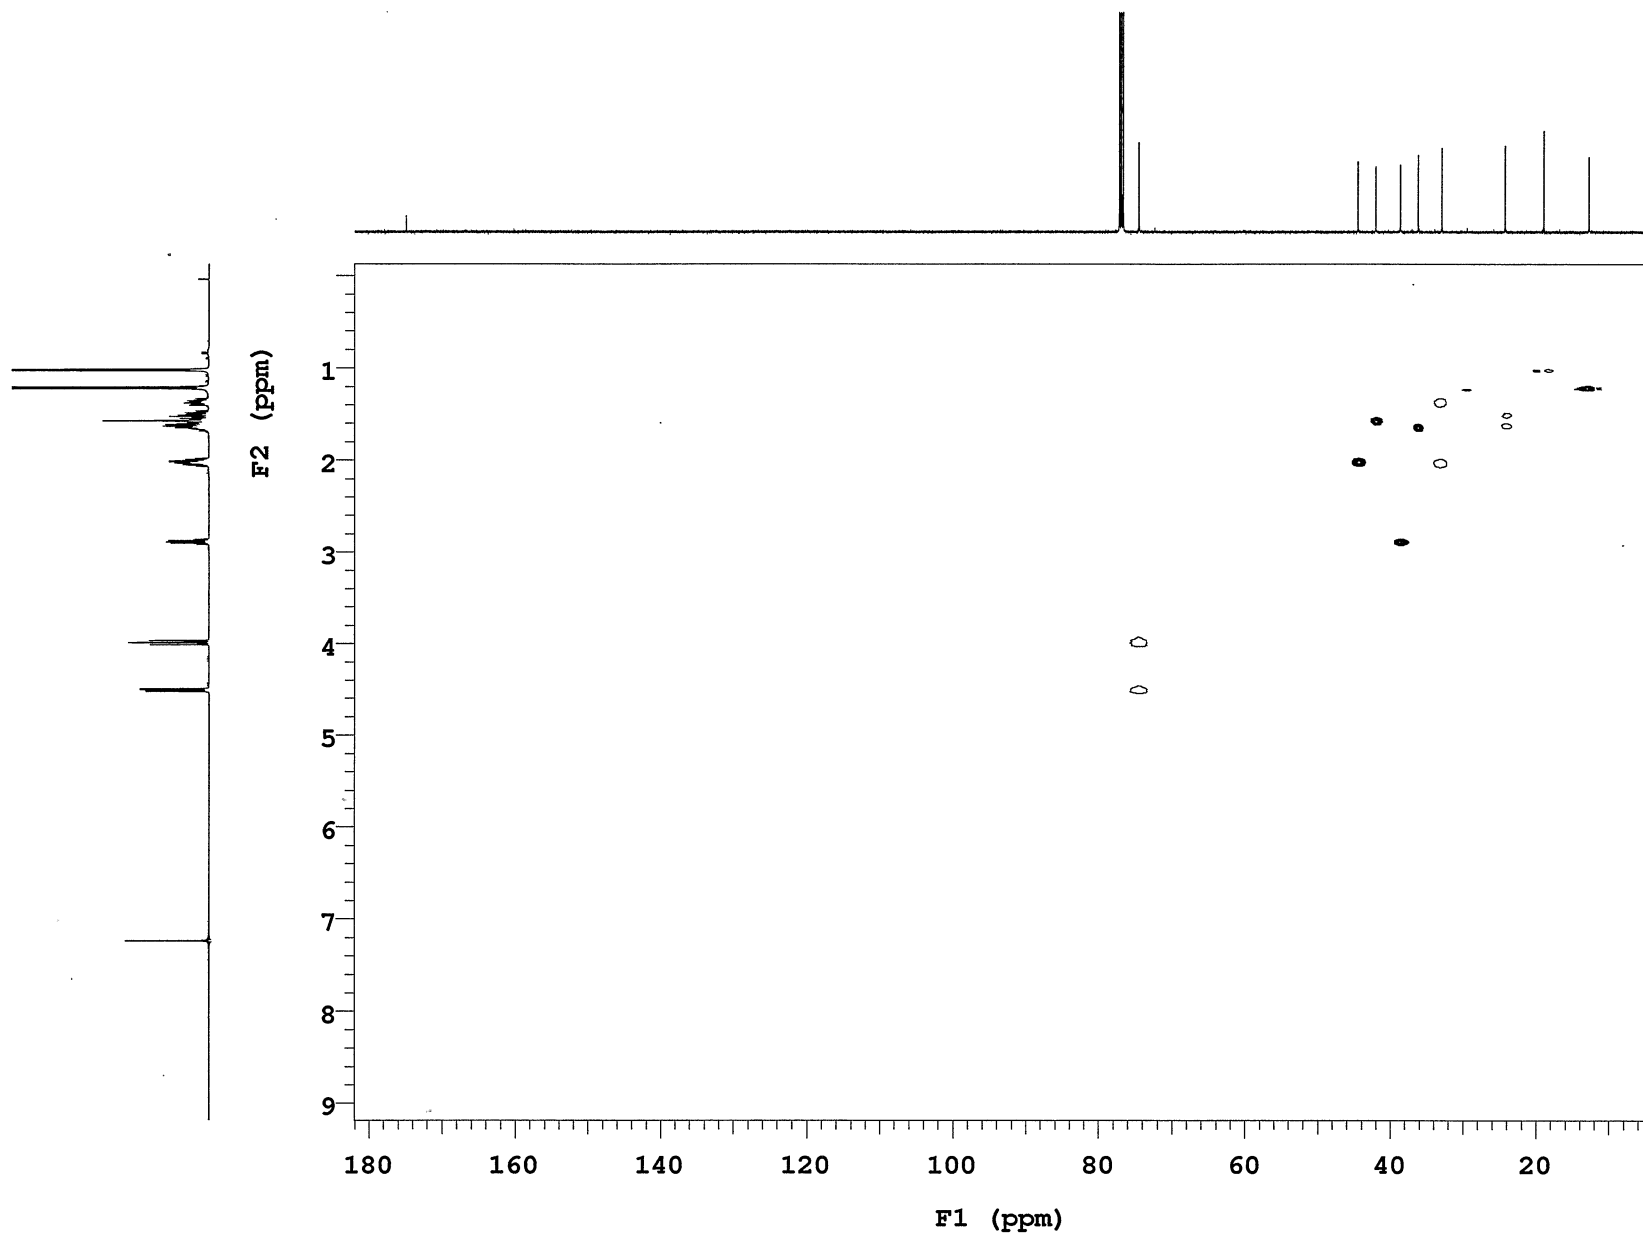

HSQC of compound 7



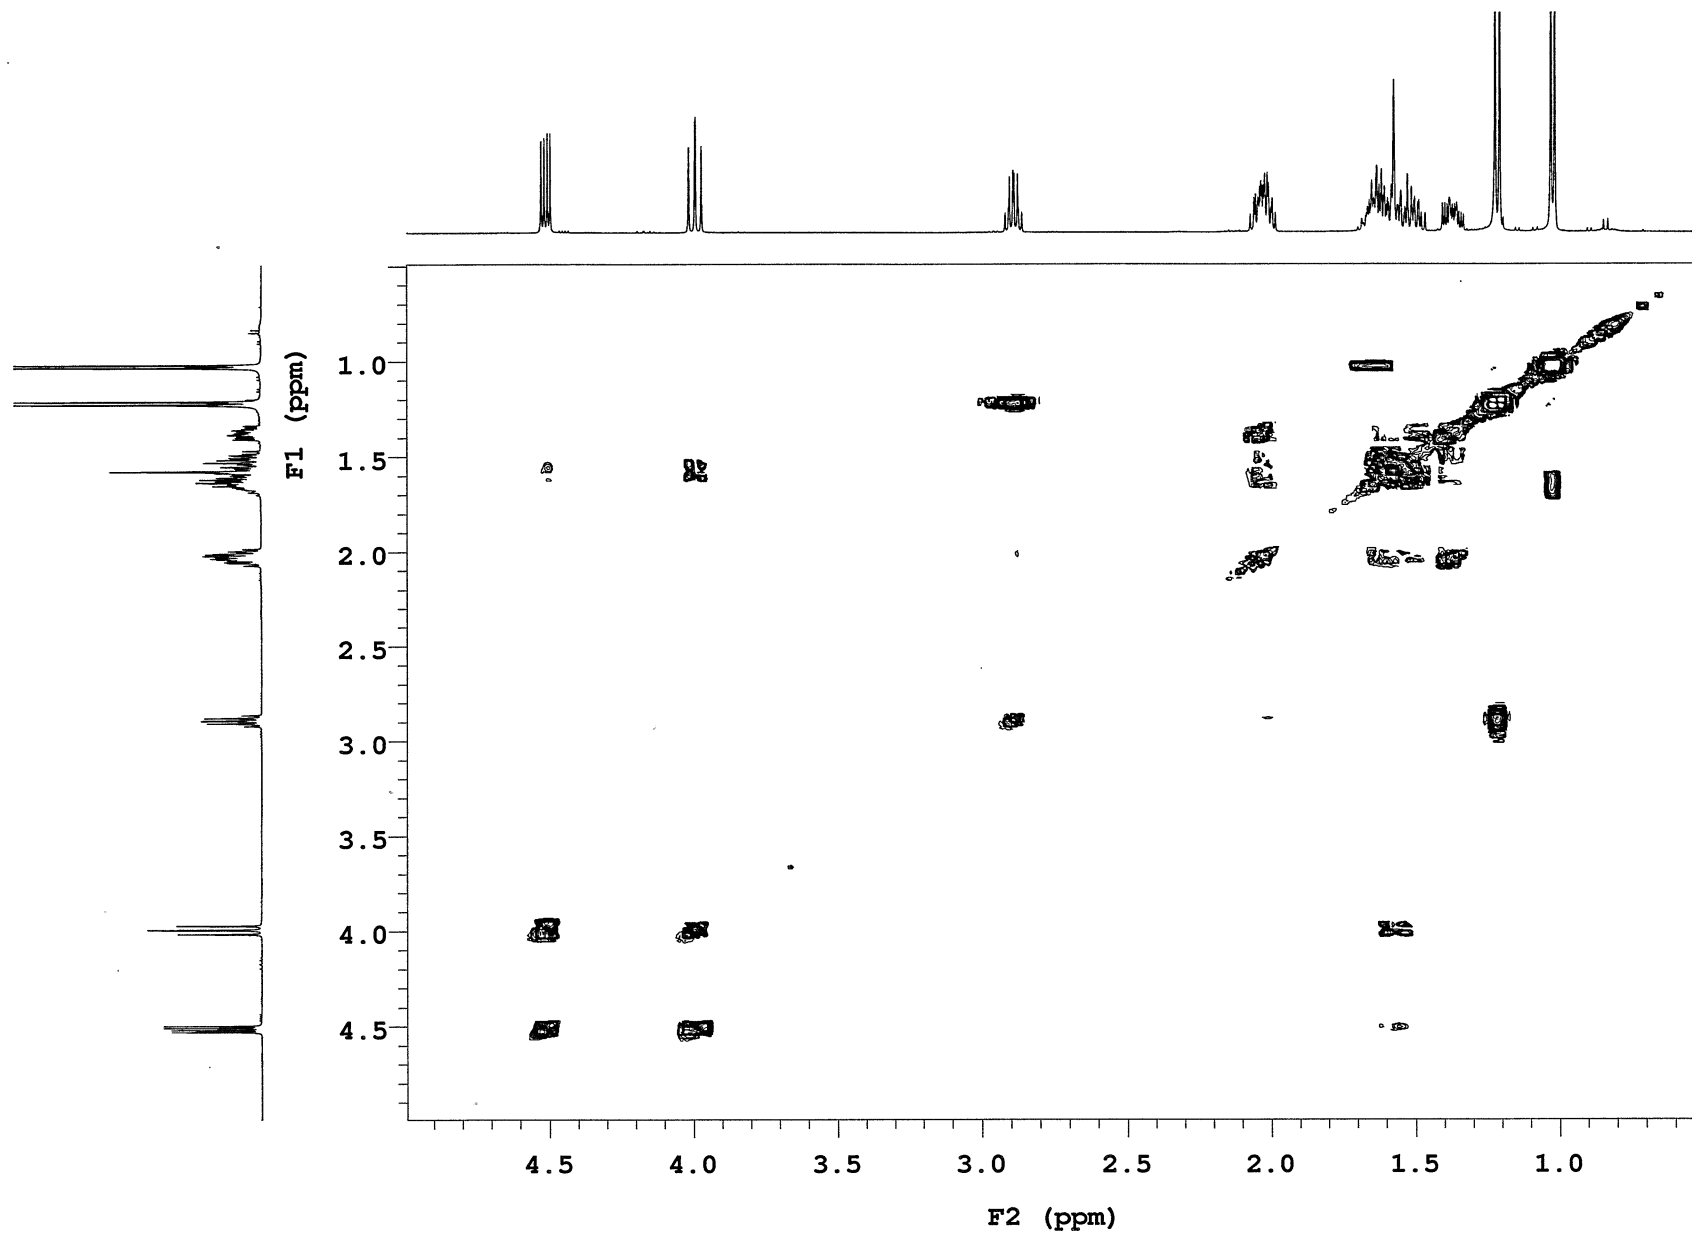

COSY of compound 7

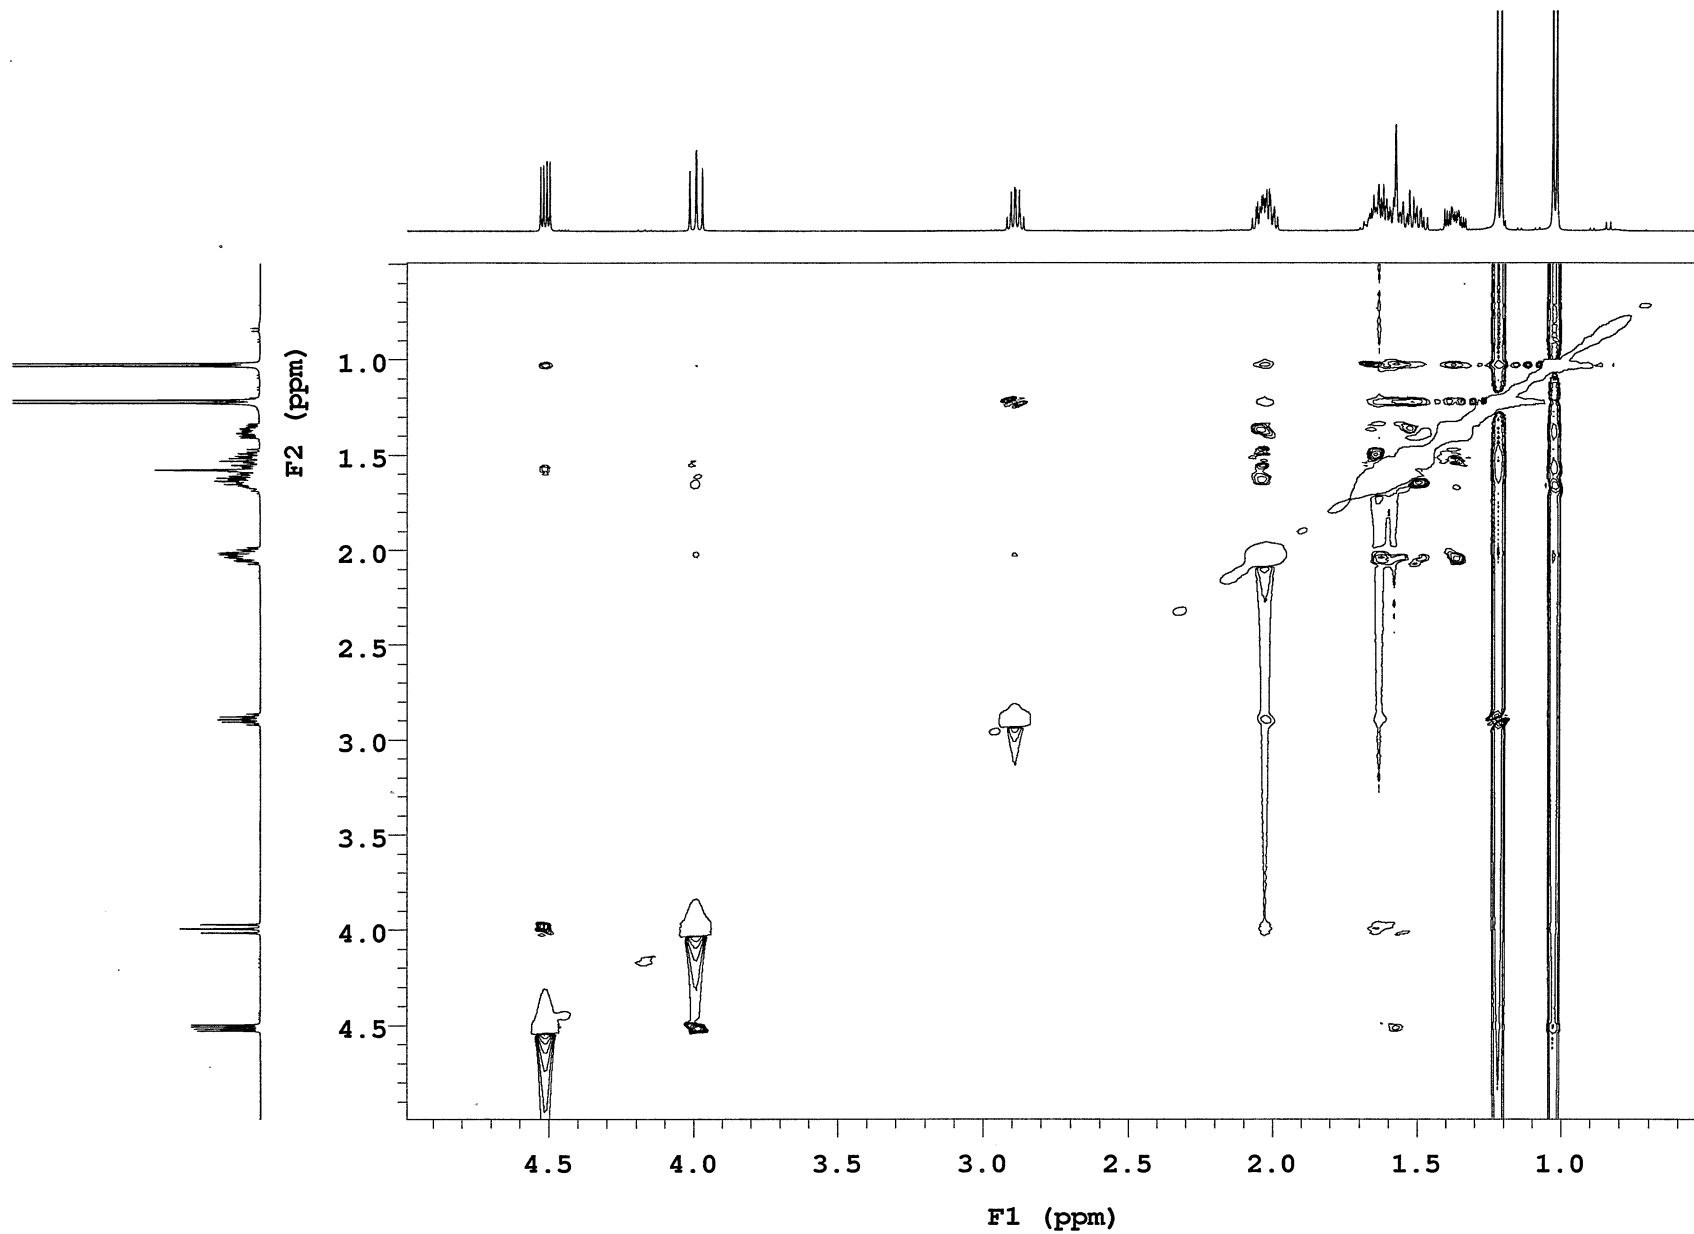

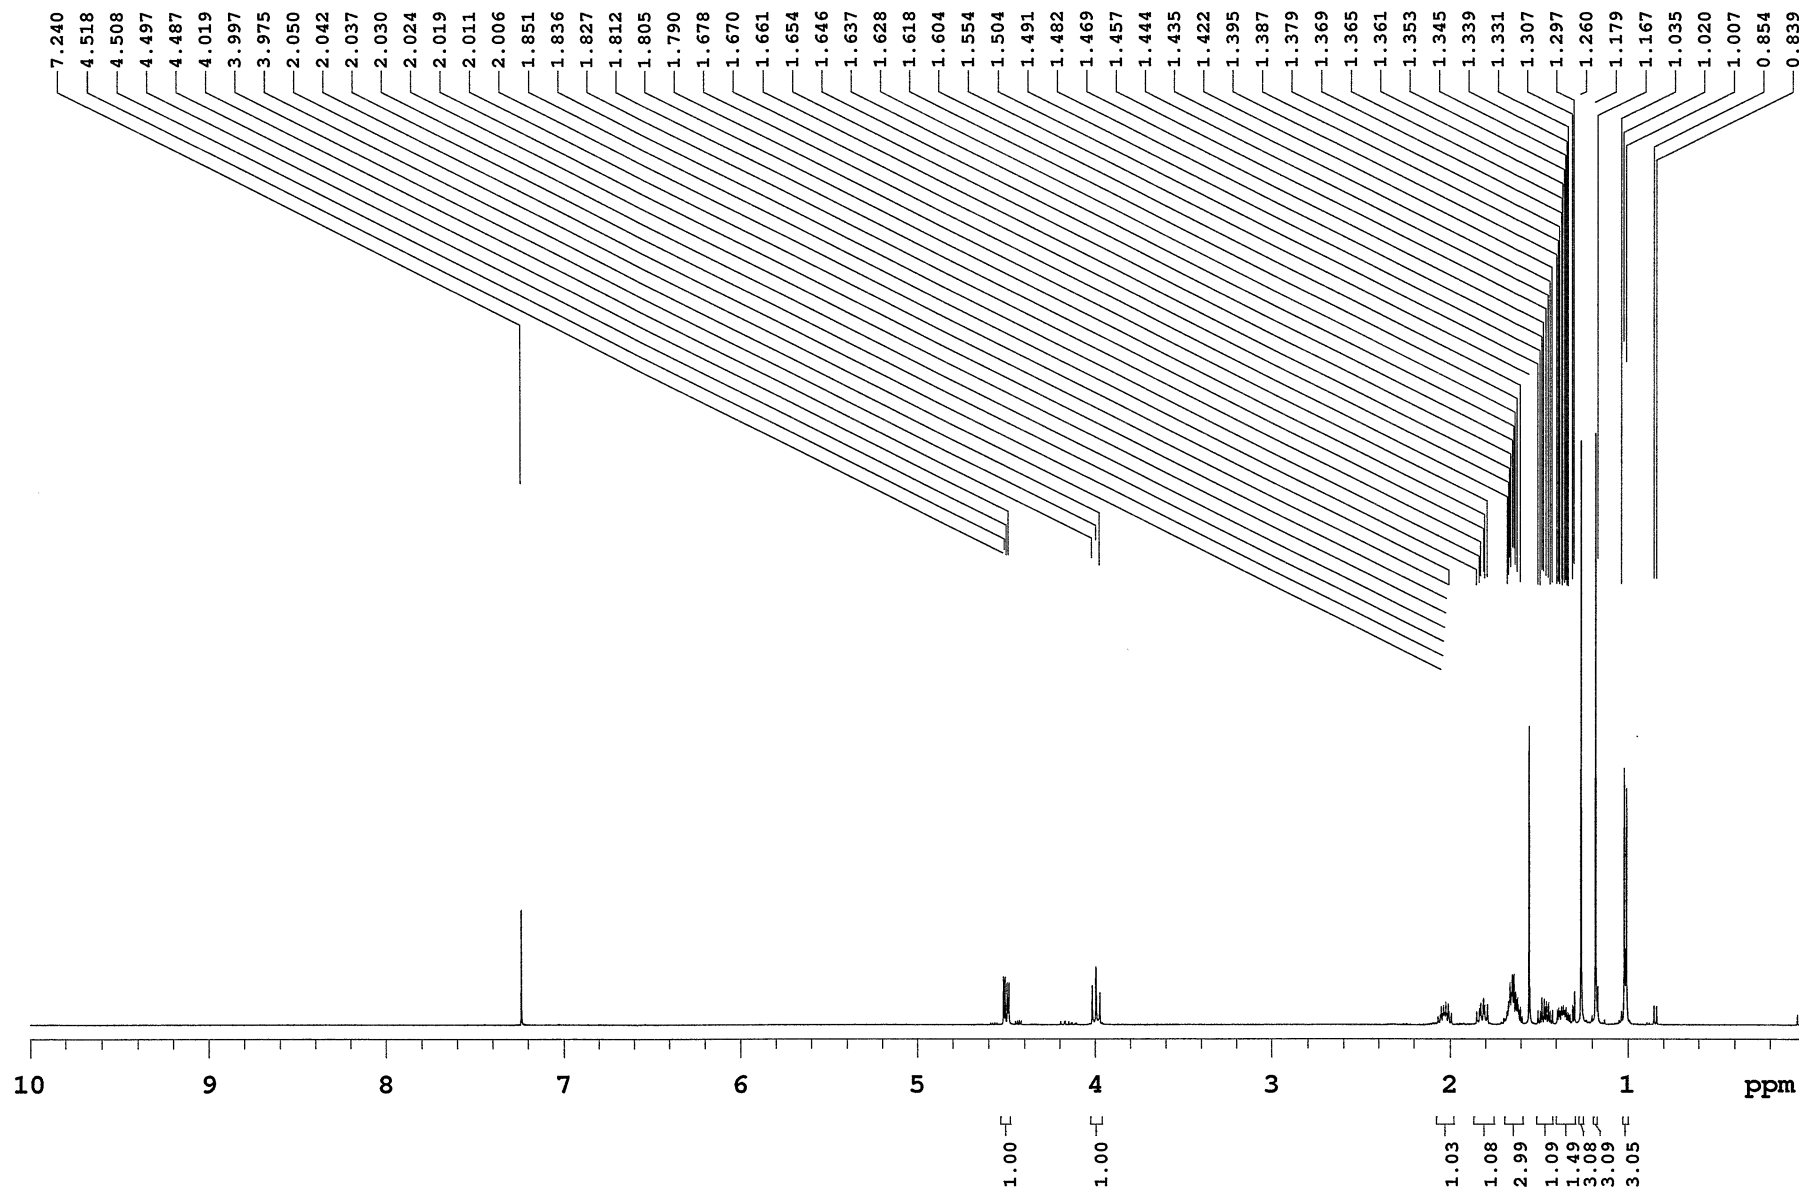

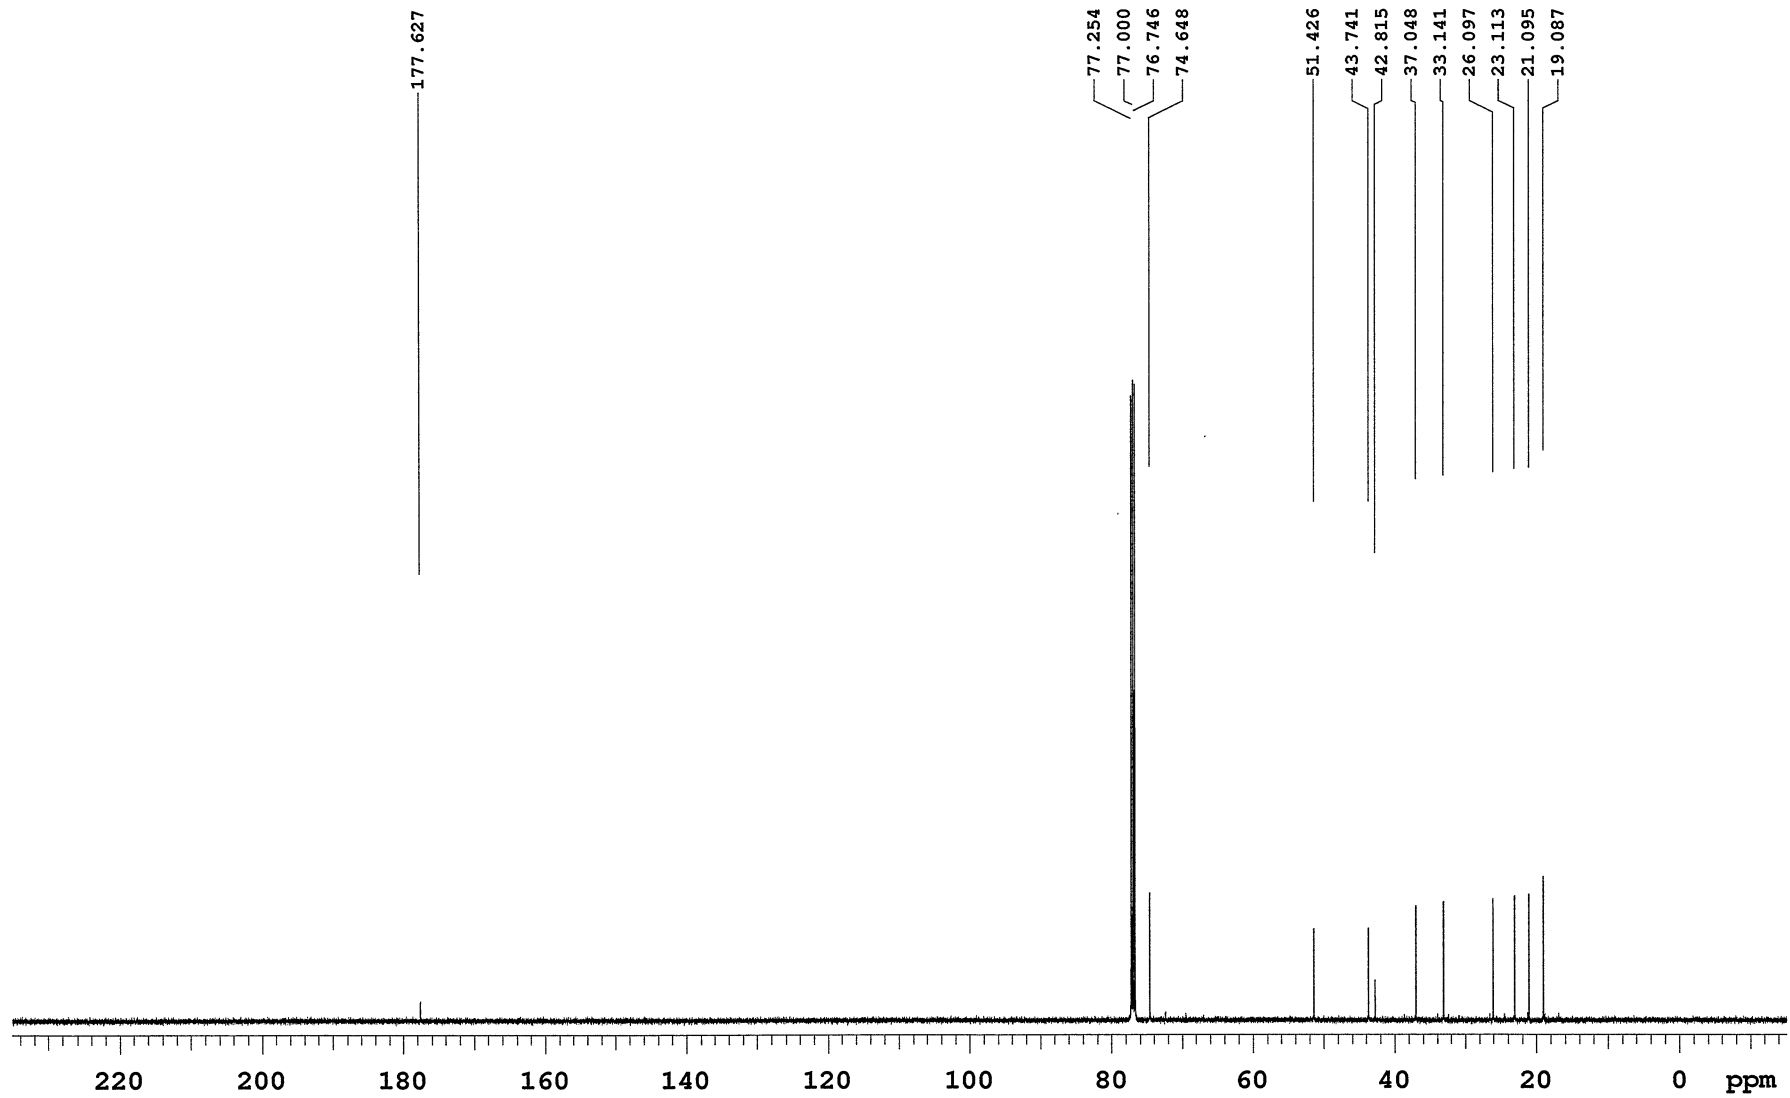13C NMR (125 MHz, CDCl<sub>3</sub>) of compound 8

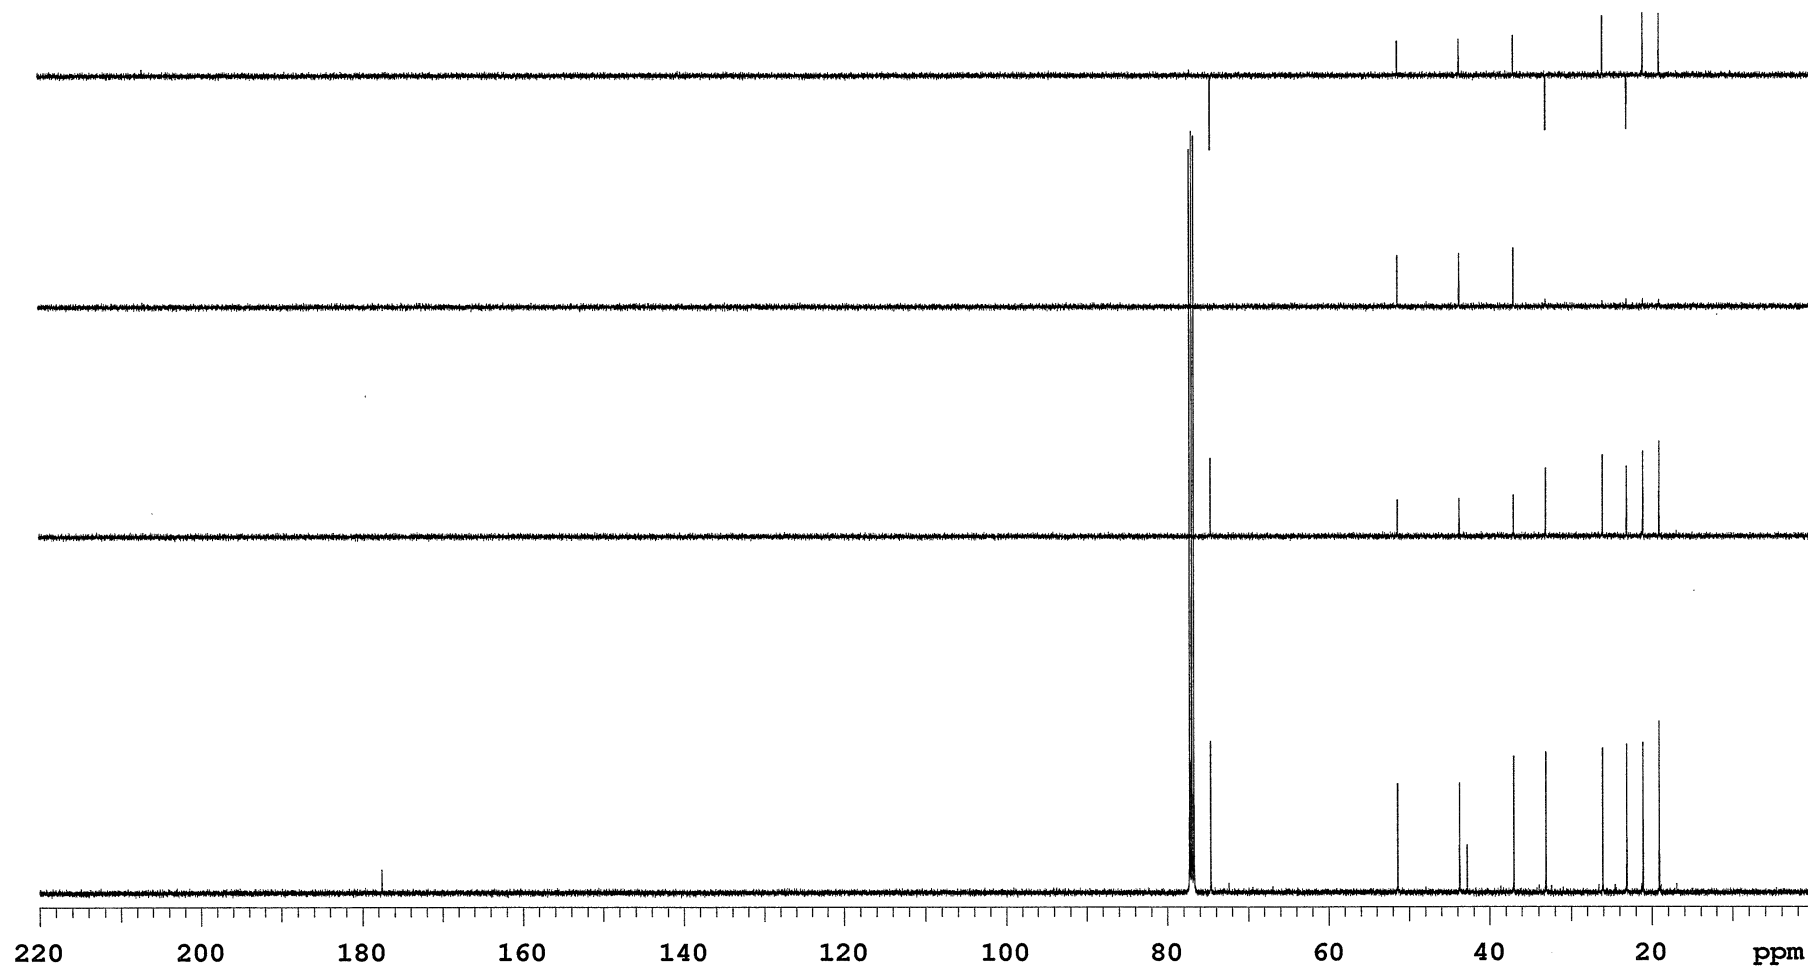

DEPT of compound 8

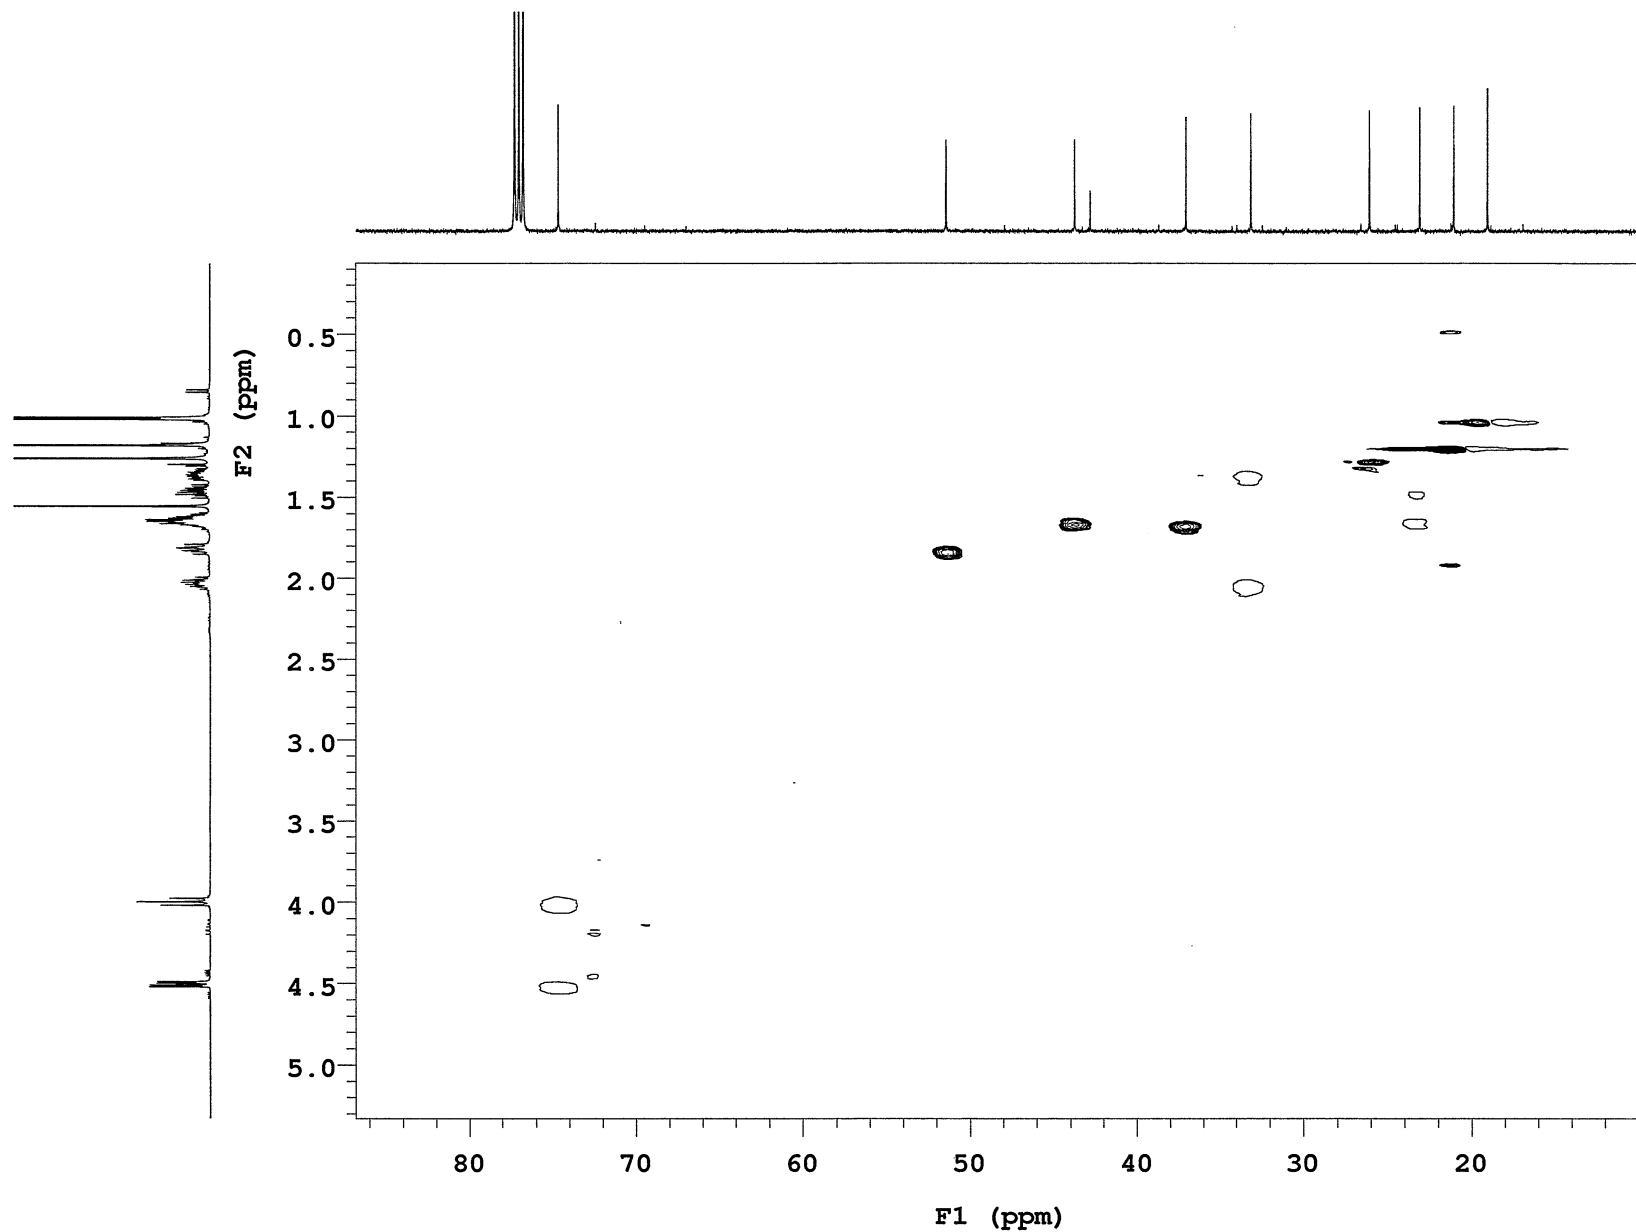

HSQC of compound 8

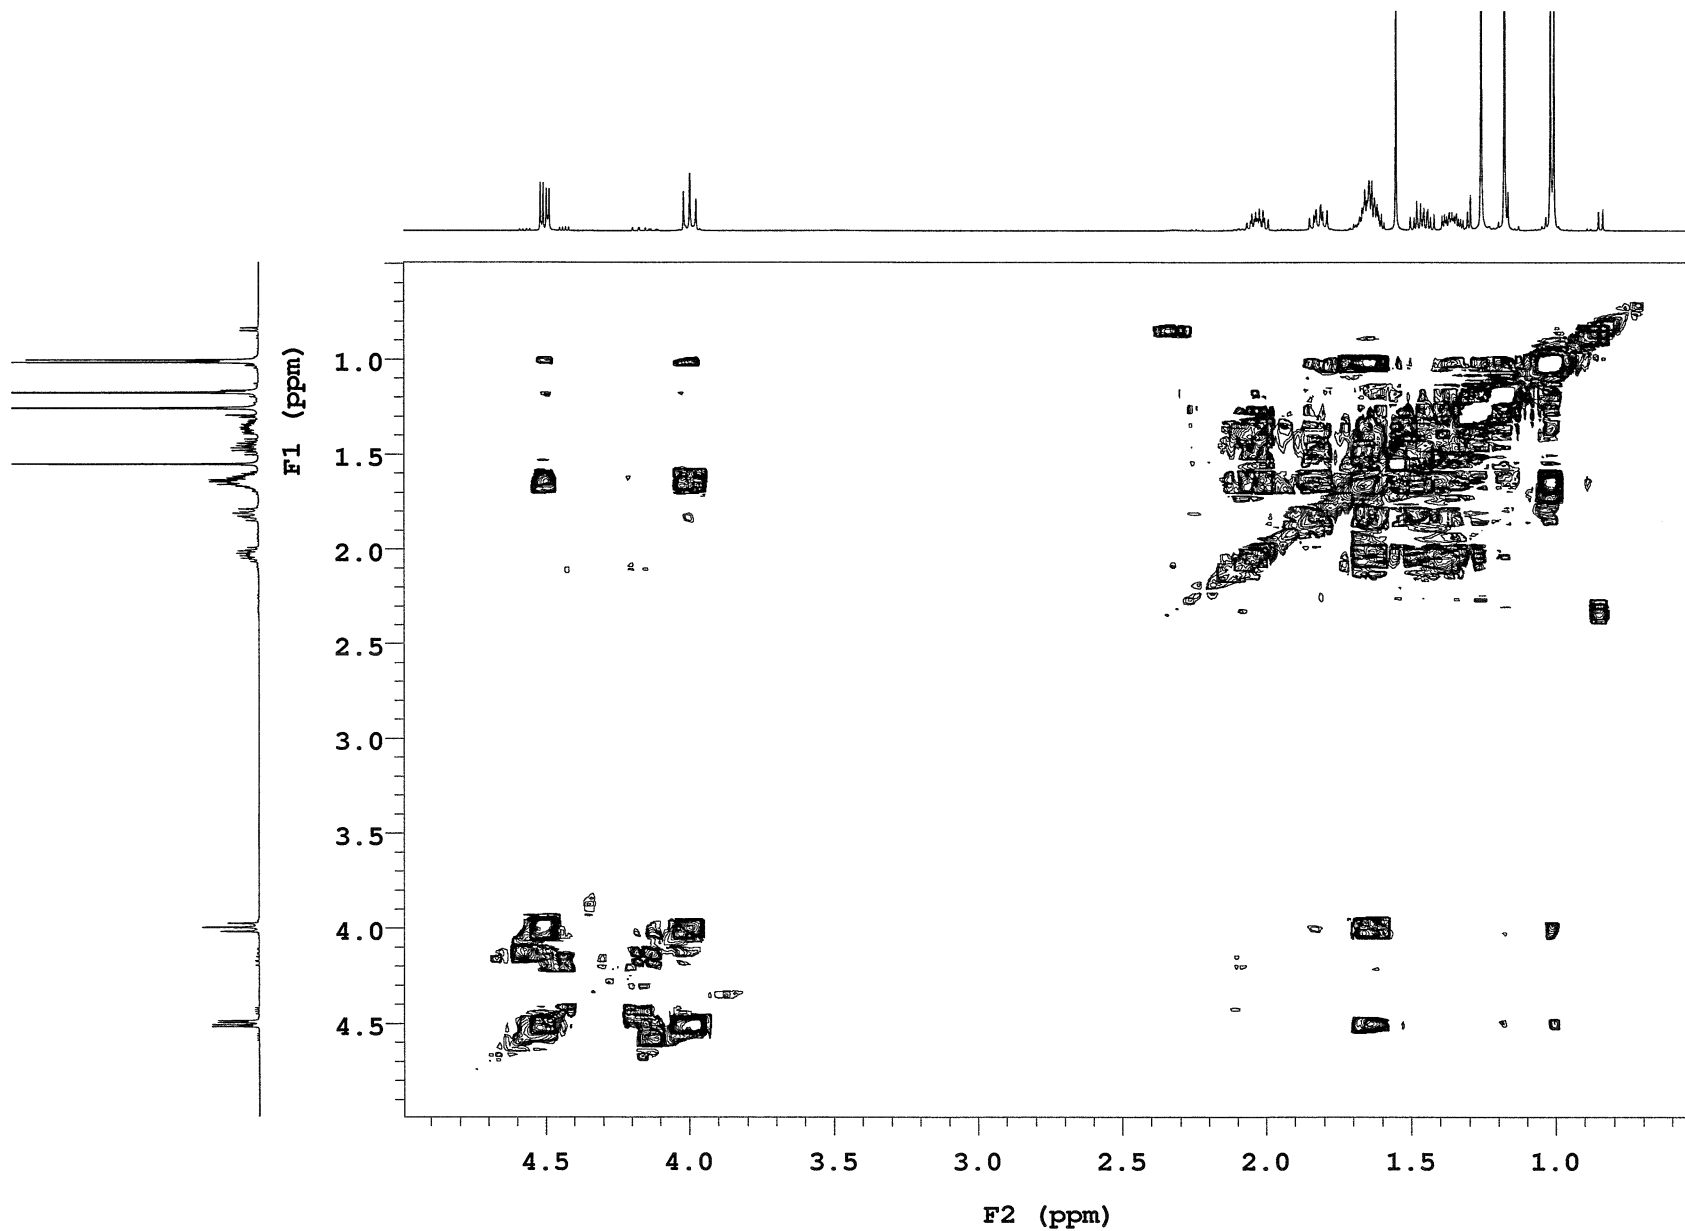

COSY of compound 8

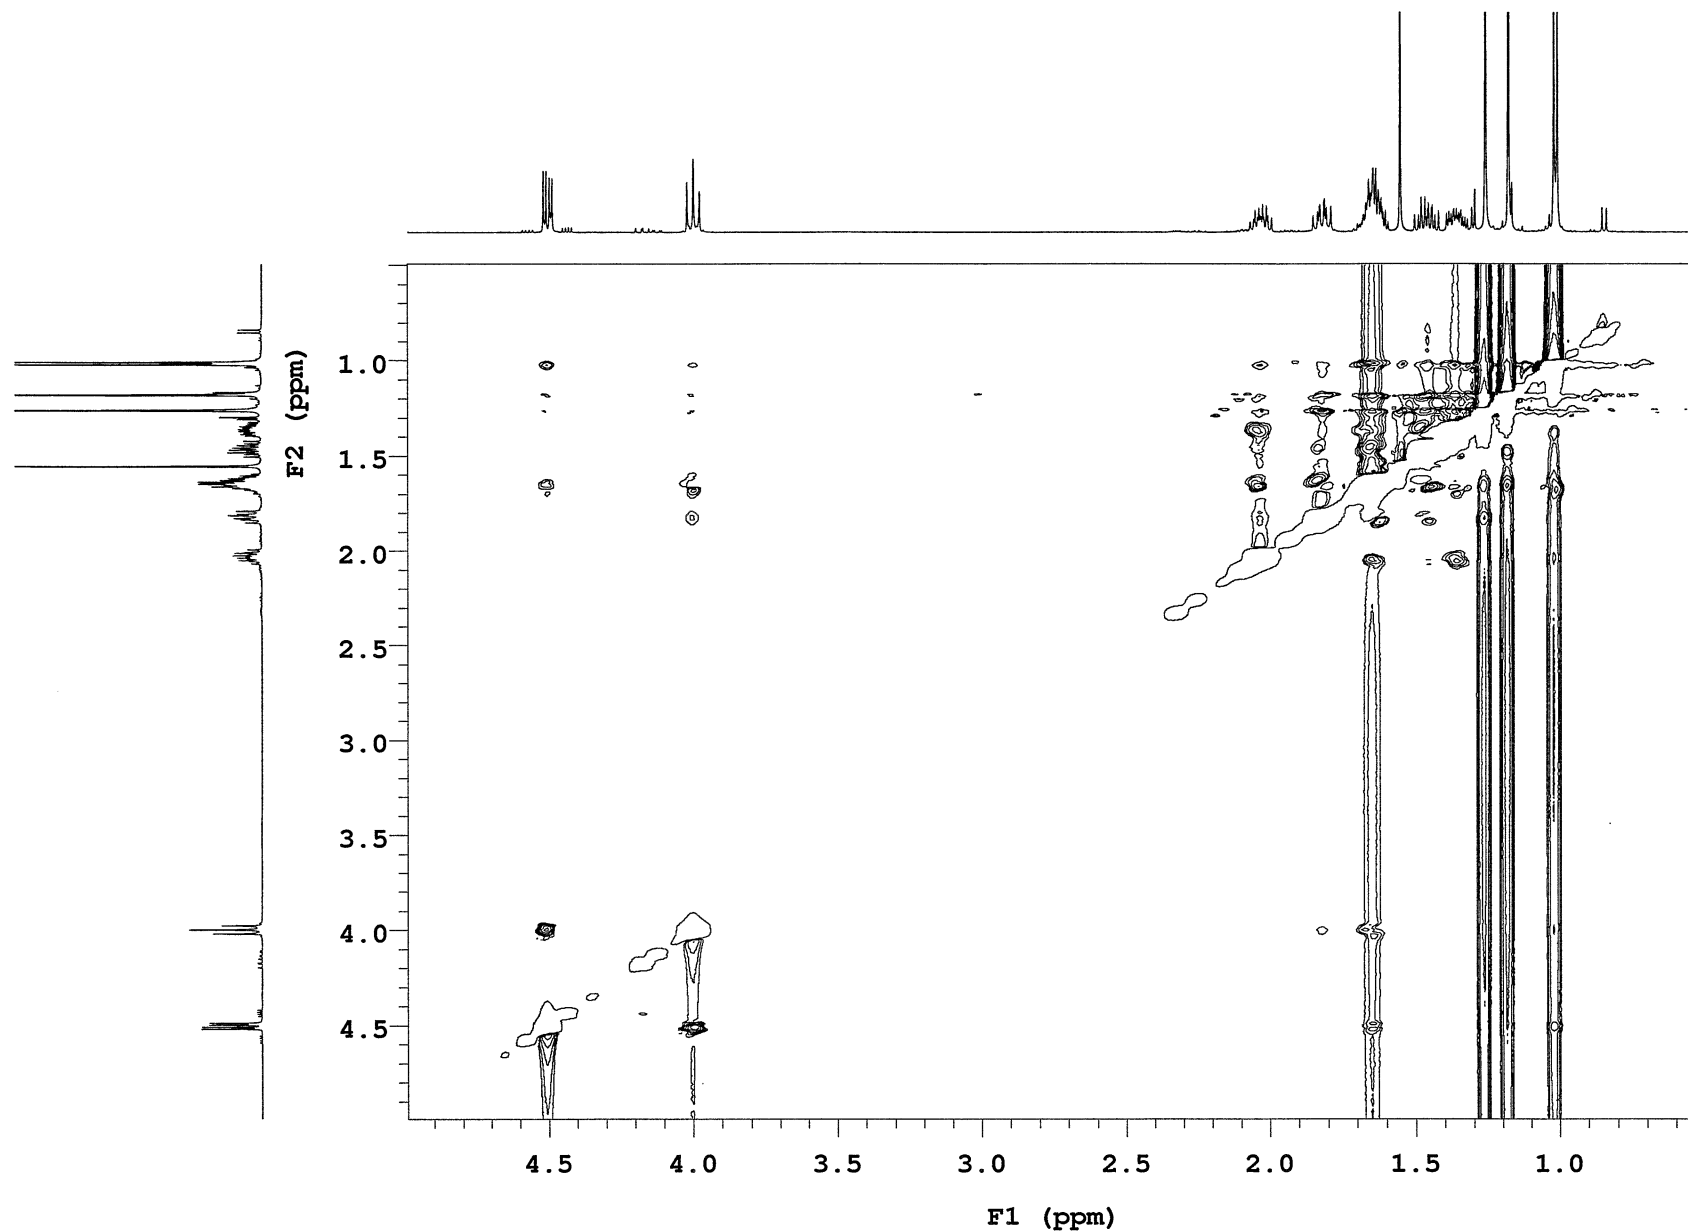

NOESY of compound 8



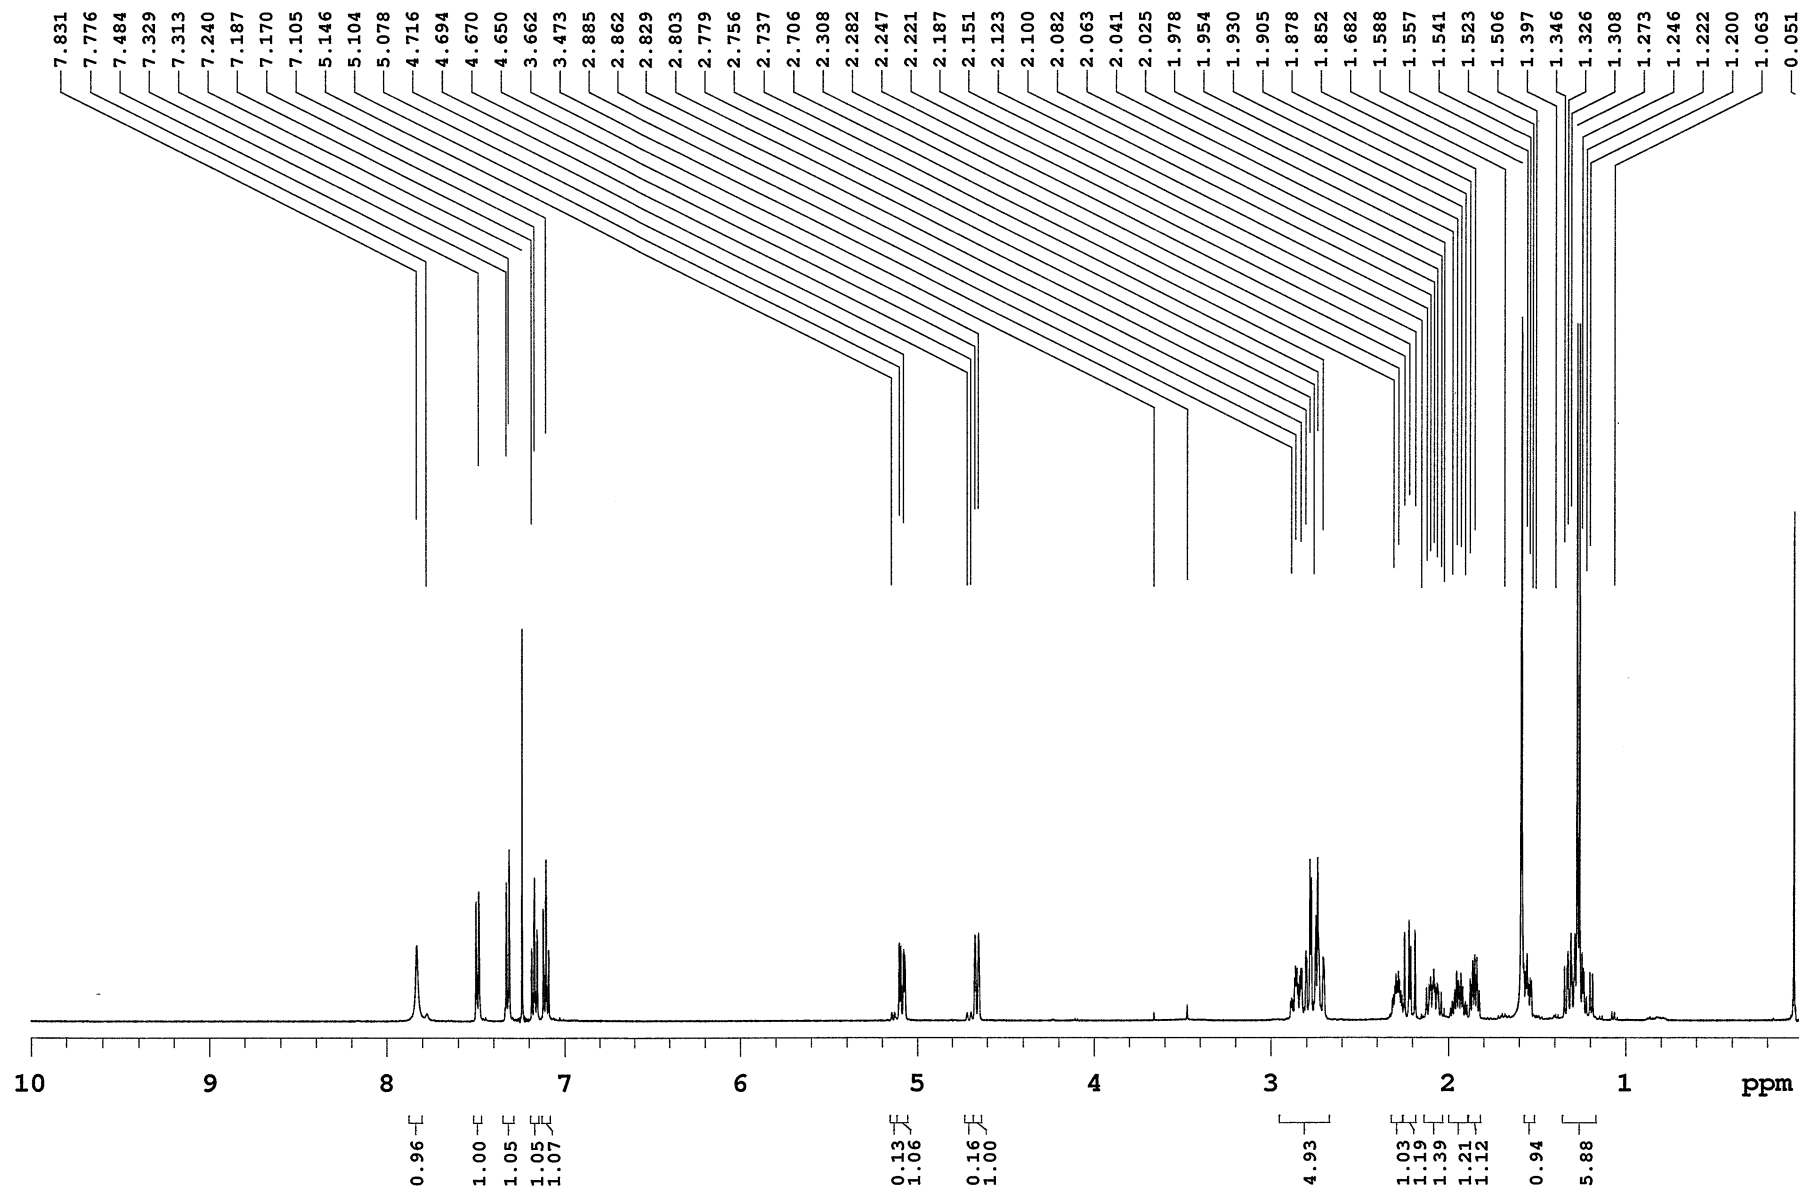

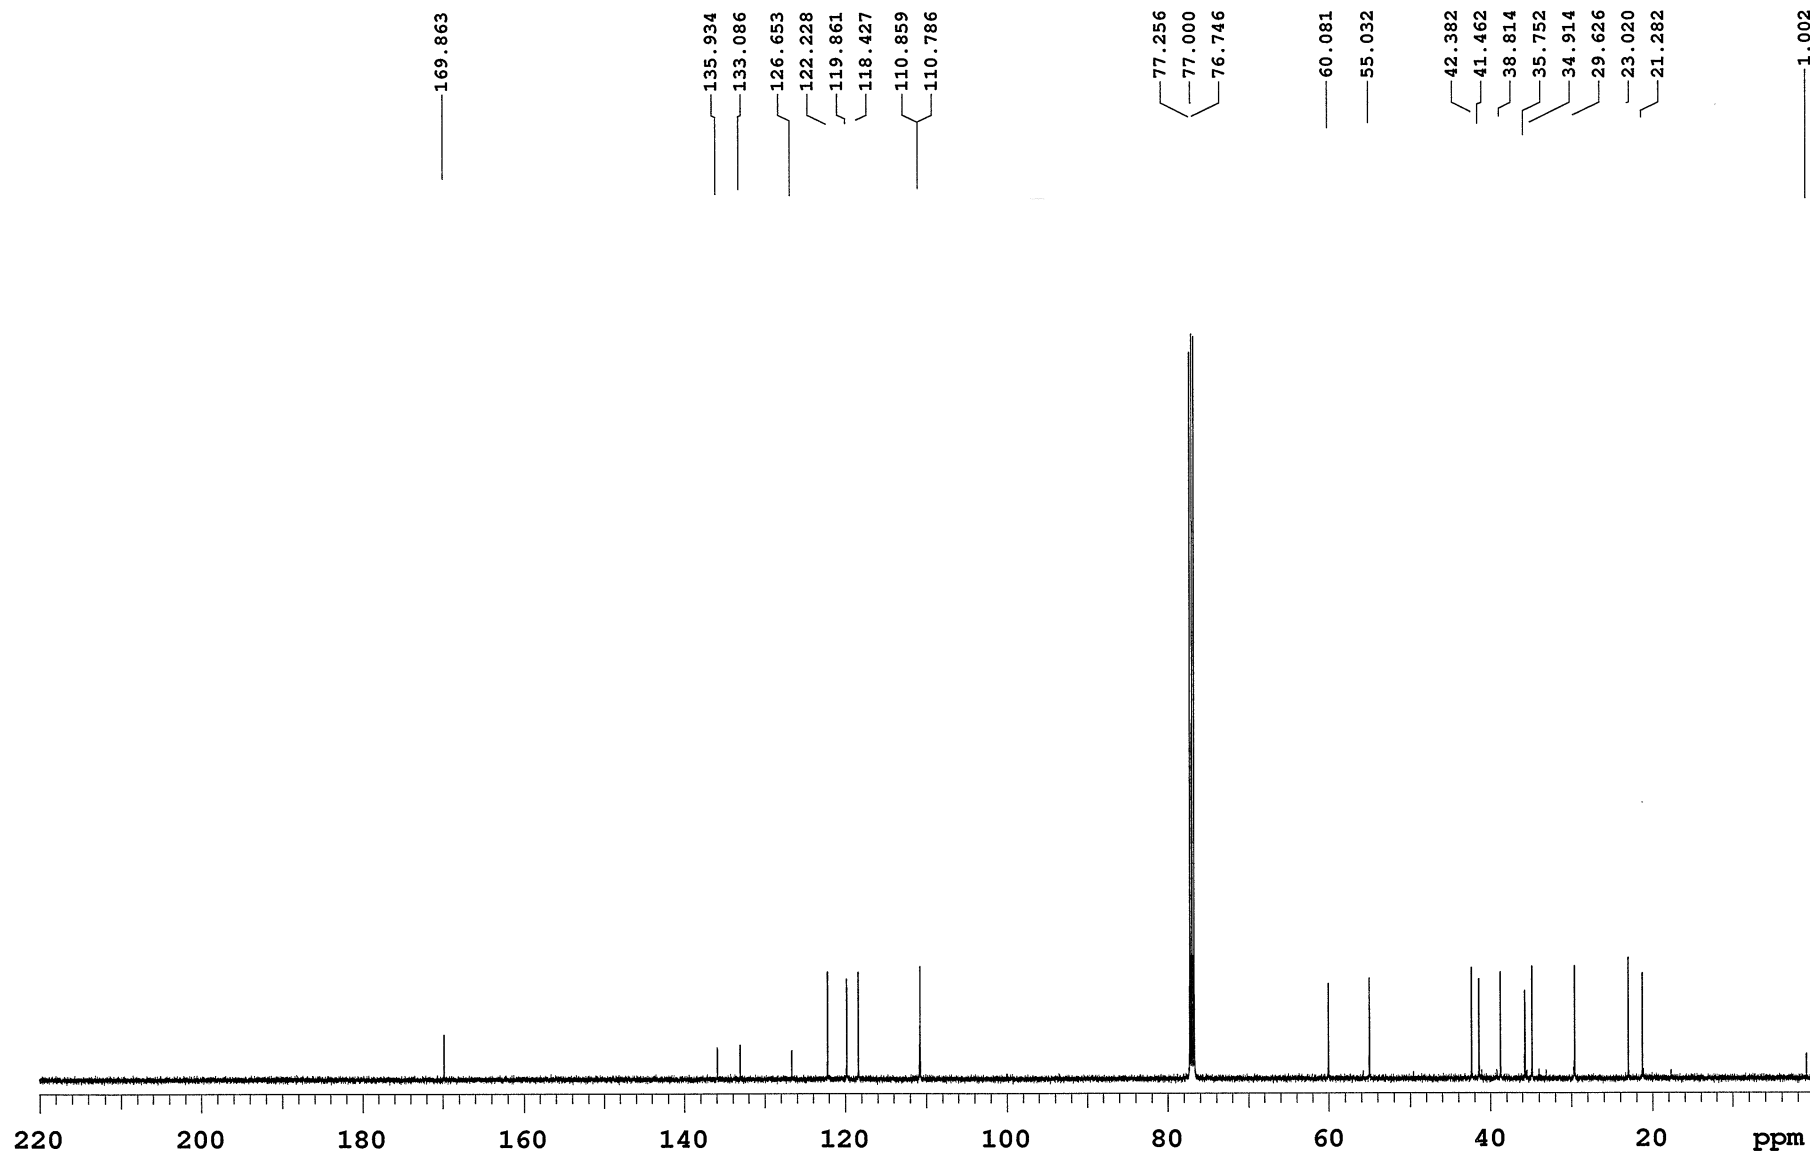

13C NMR (125 MHz, CDCl3) of compound 10a

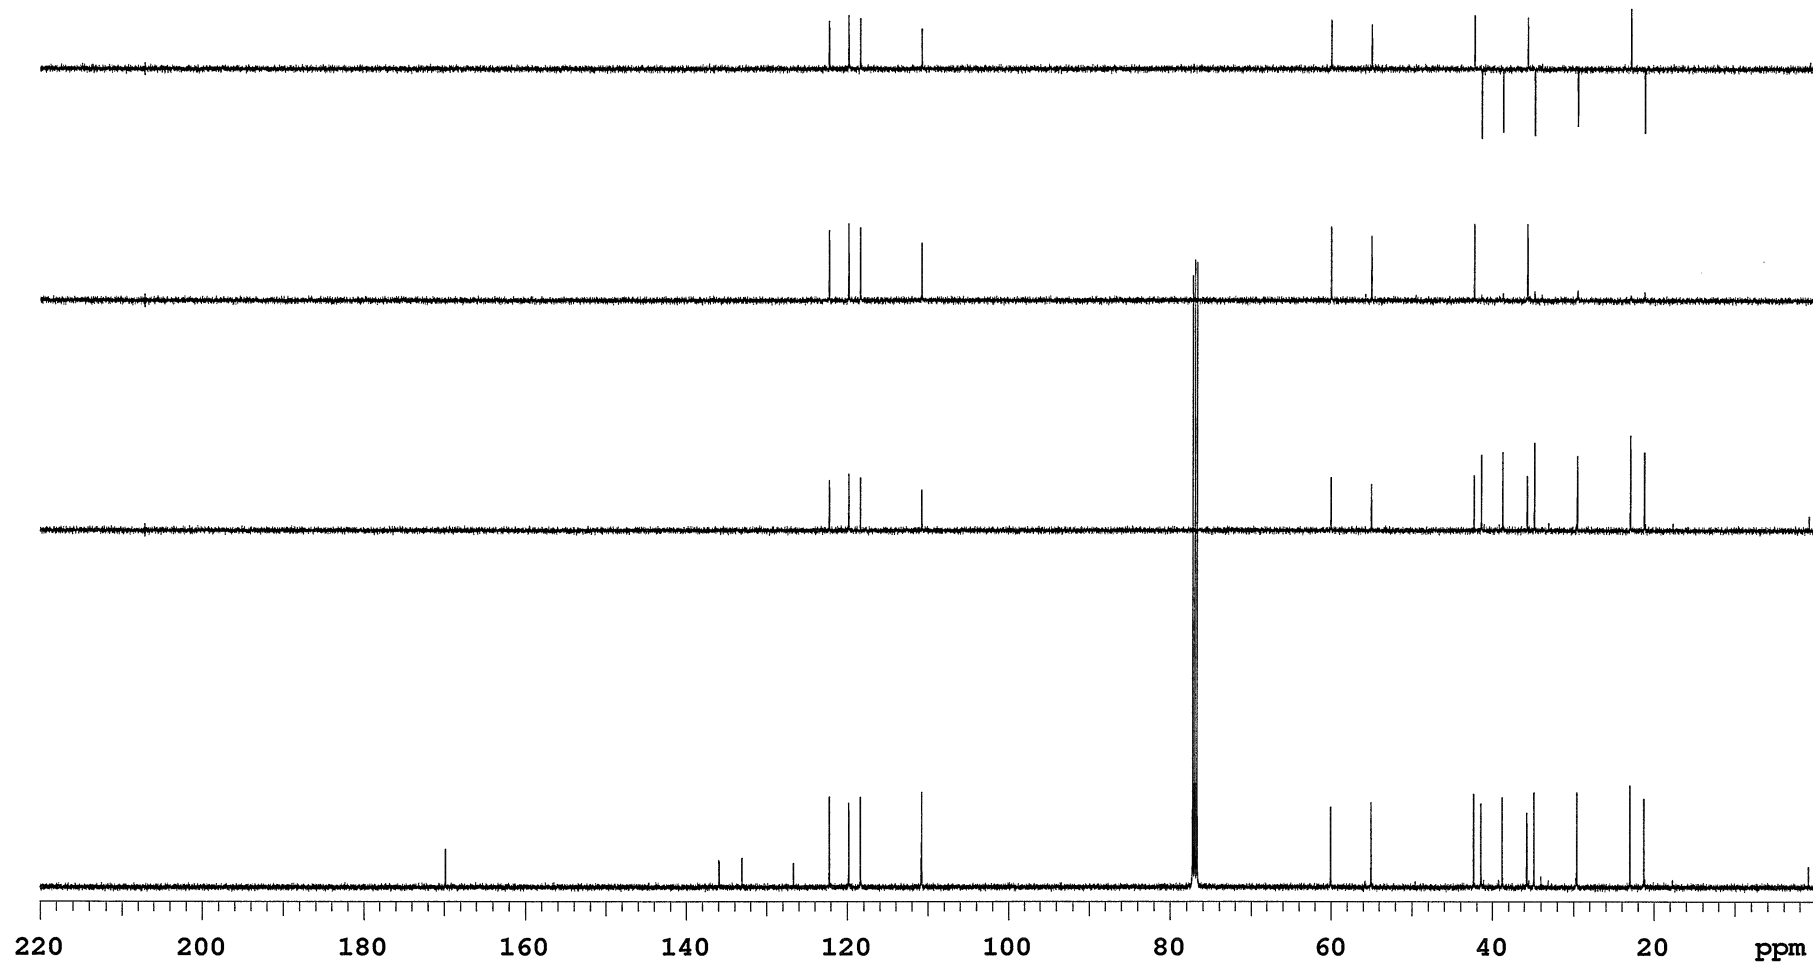

DEPT of compound 10a

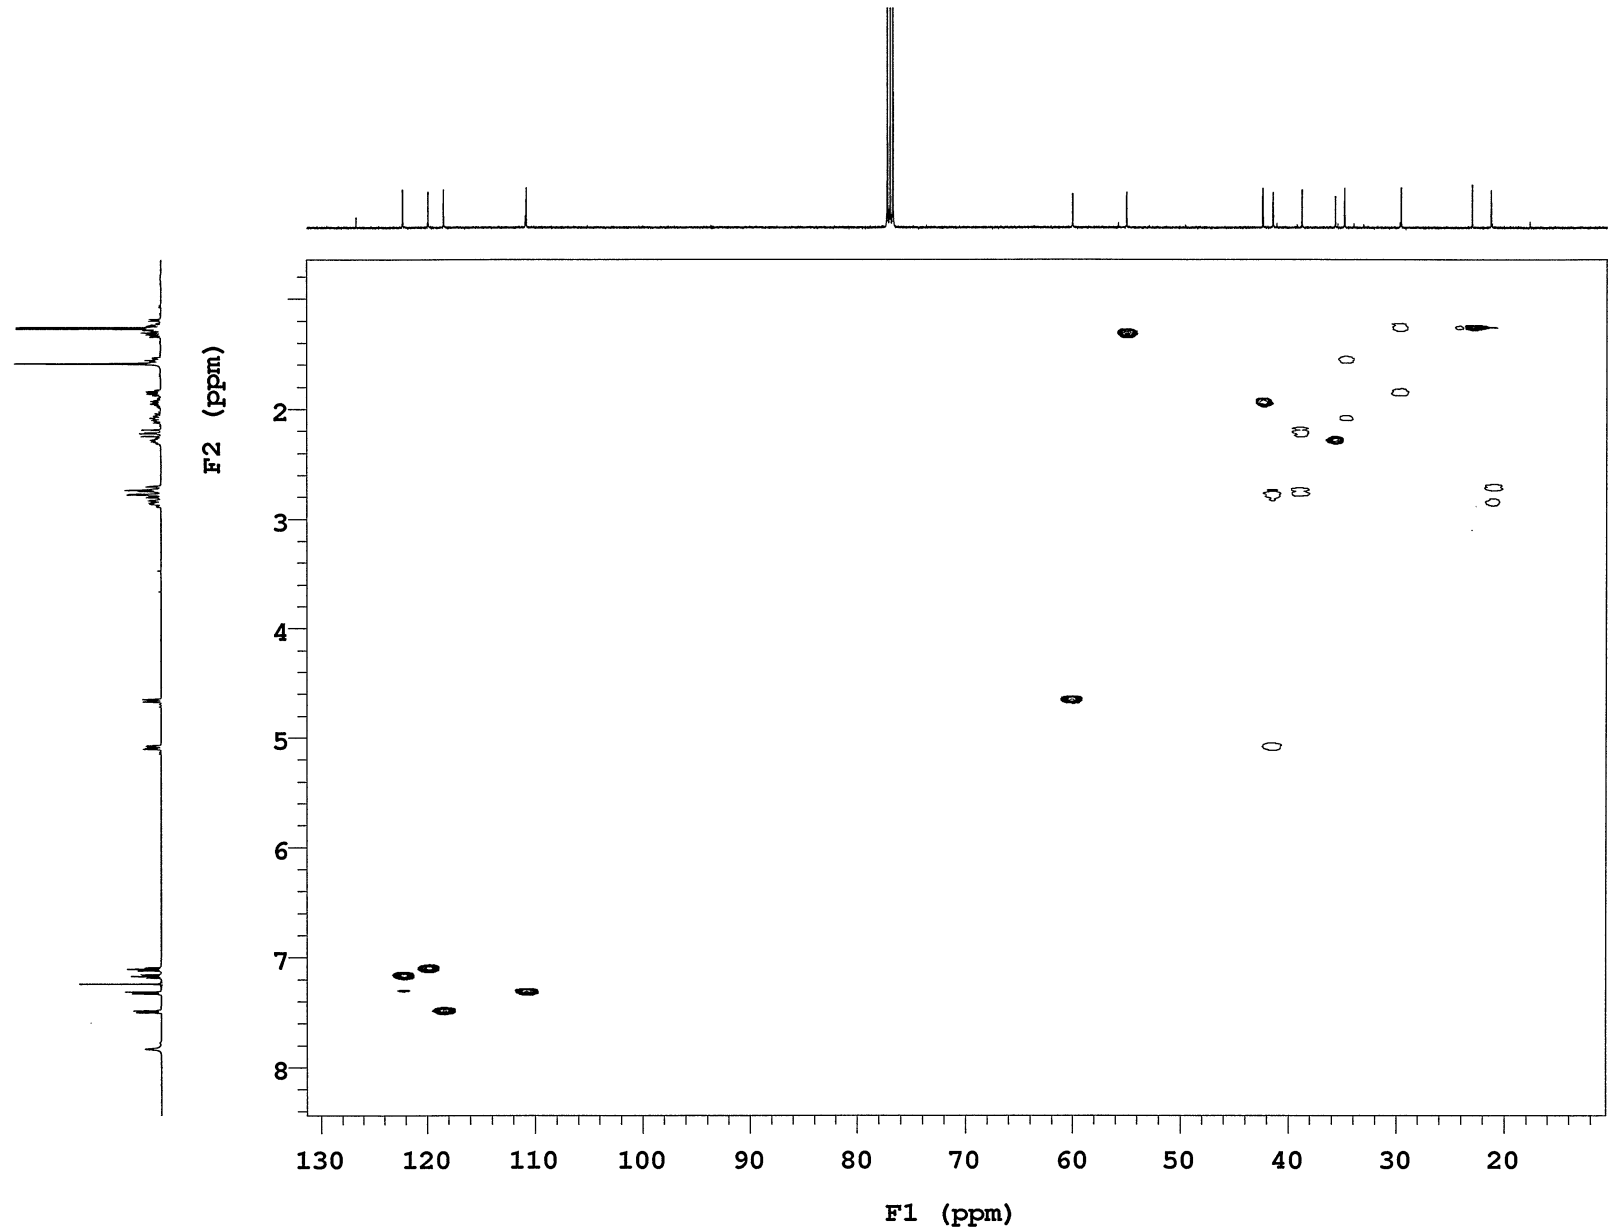

HSQC of compound 10a

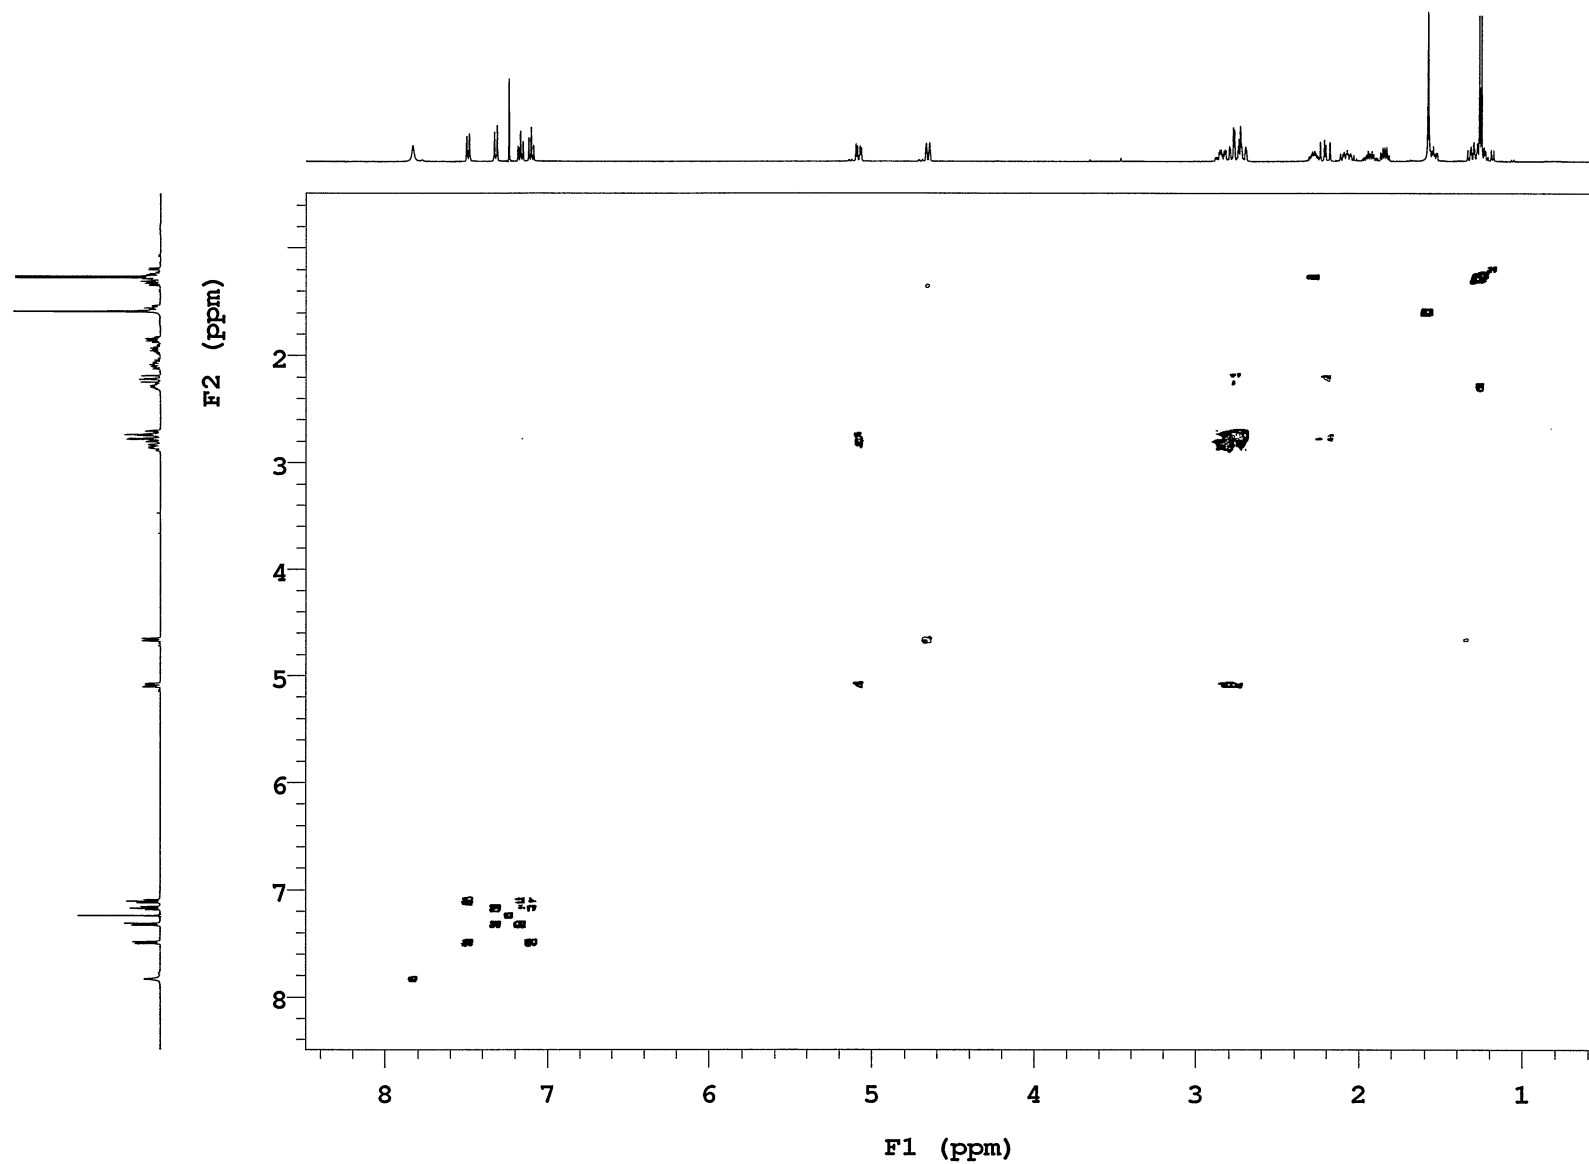

COSY of compound 10a

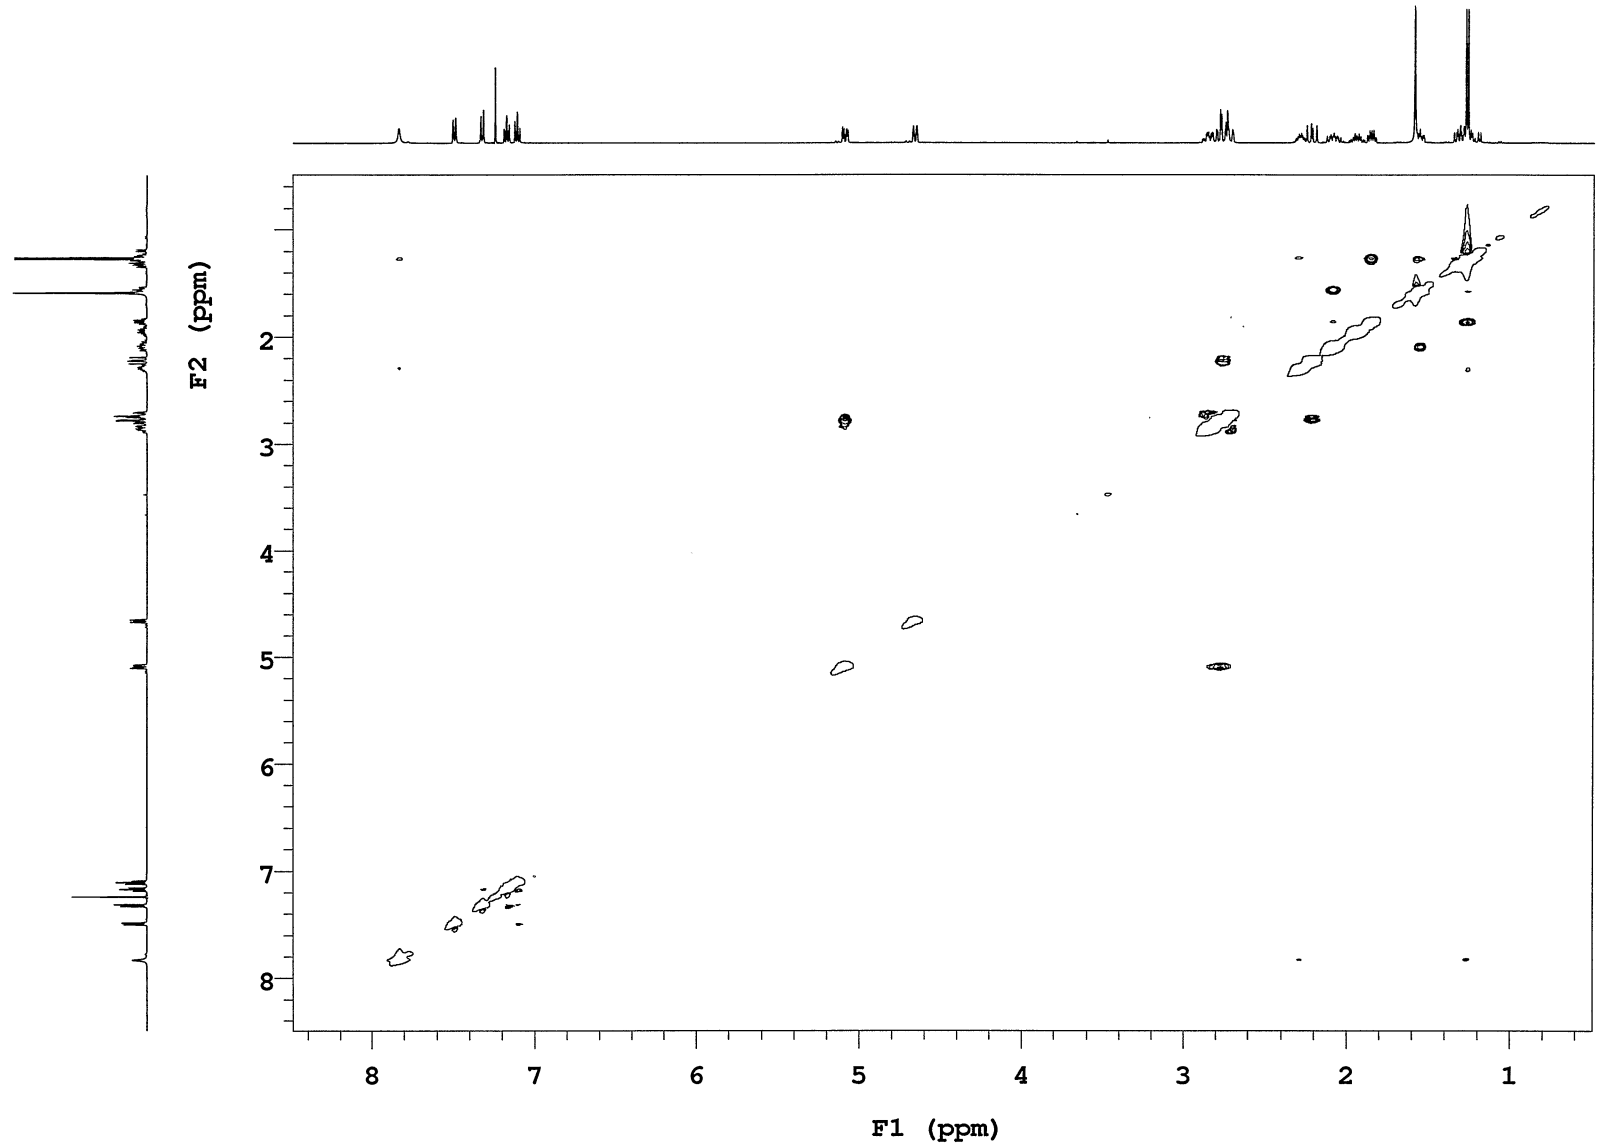

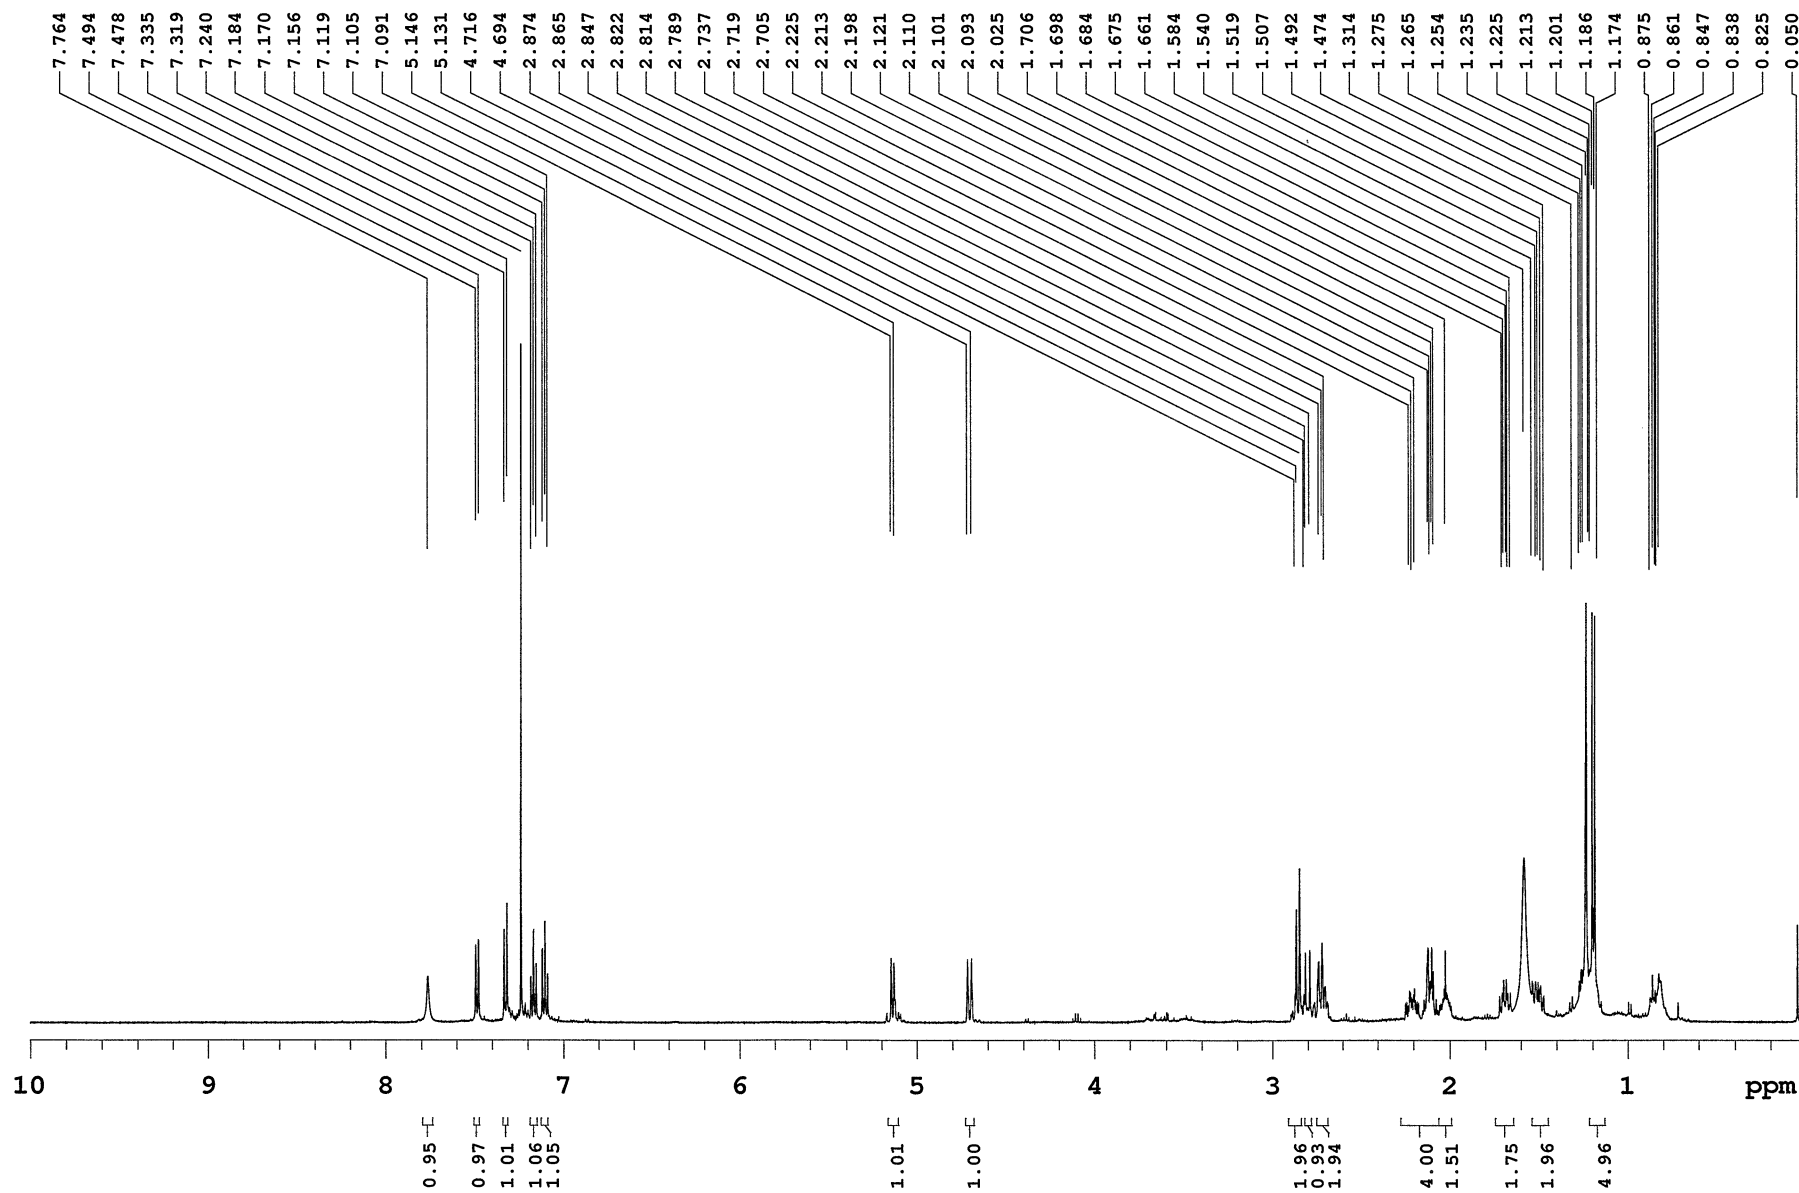

Sample Name **RRT-04-064-I**  
Date collected **2022-10-13**

Pulse sequence **CARBON**  
Solvent **cdcl3**

Temperature **25**  
Spectrometer **Agilent-NMR-inova500**

Study owner **vnmr2**  
Operator **vnmr2**

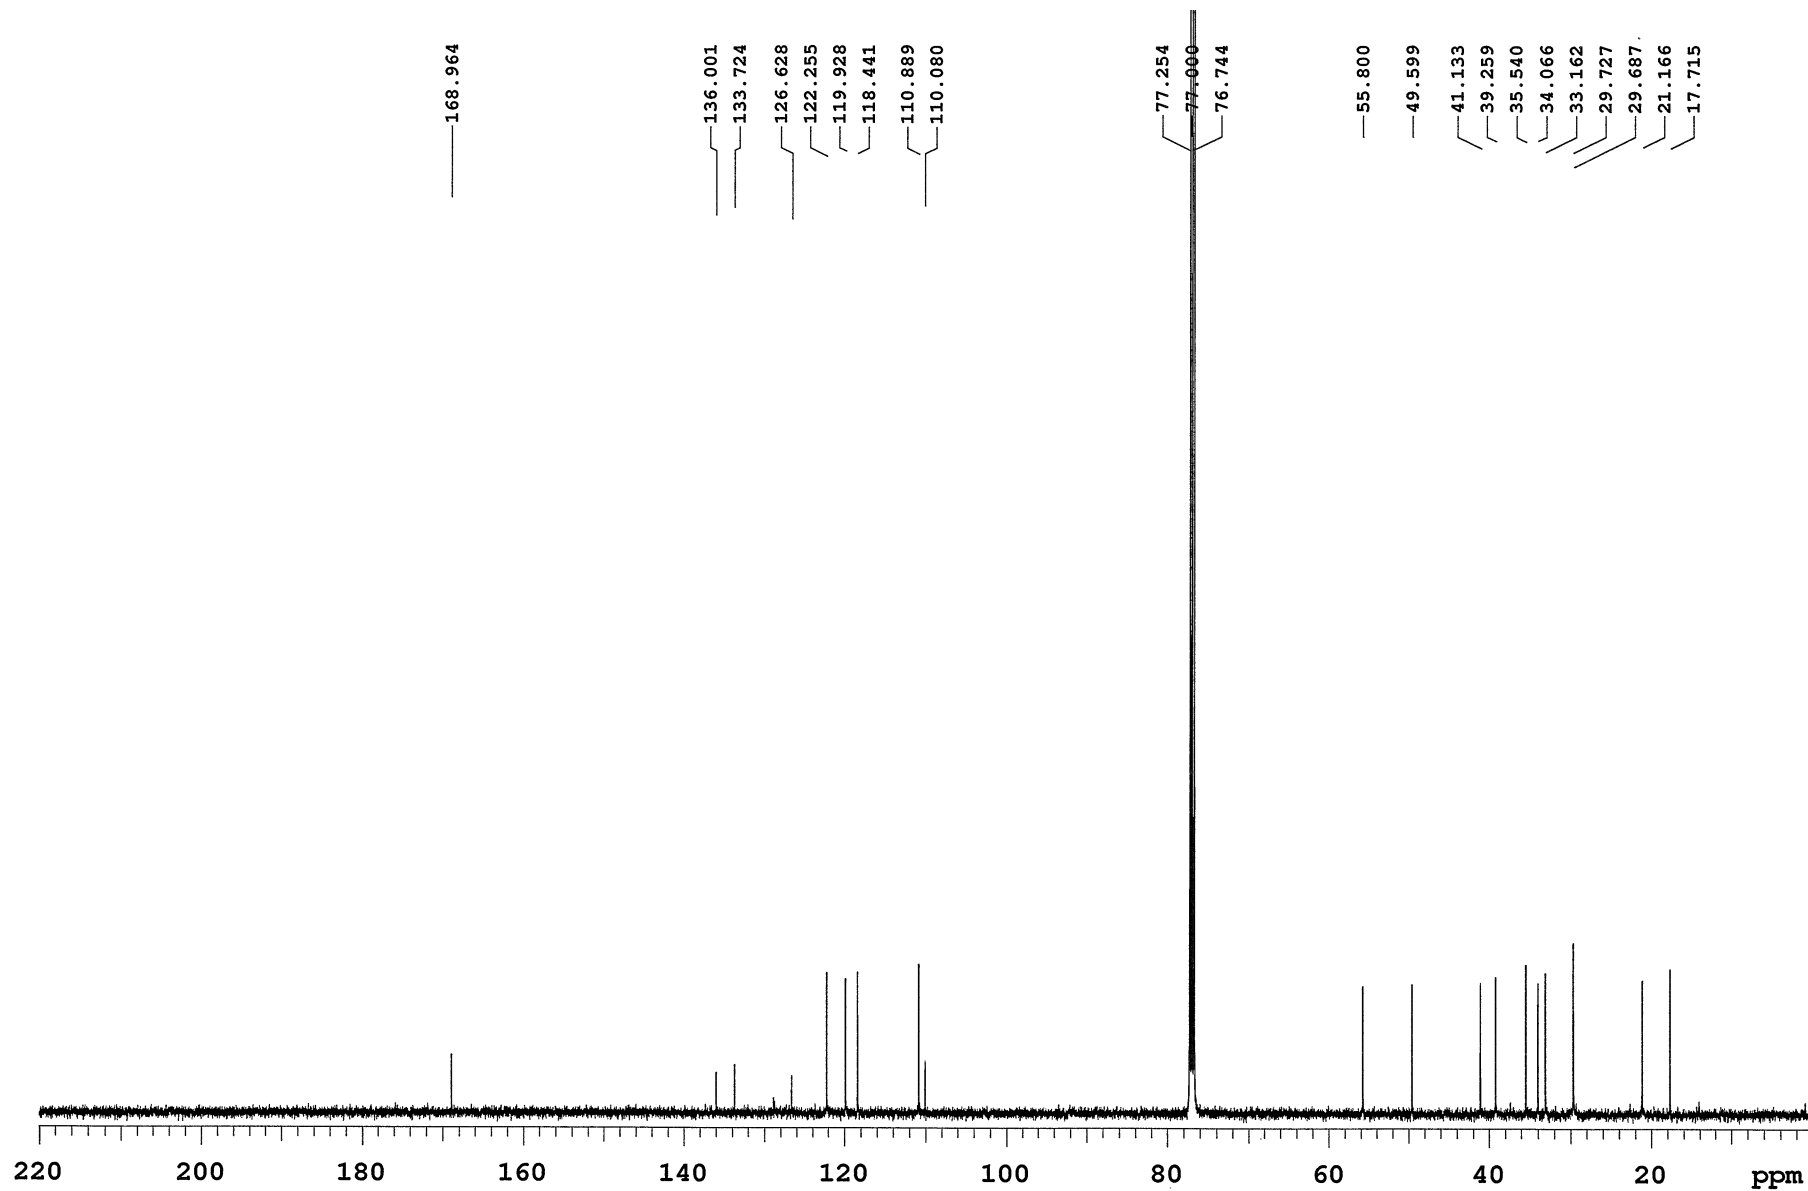

13C NMR (125 MHz, CDCl<sub>3</sub>) of compound 11a



Sample Name **RRT-04-064-I**  
Date collected **2022-10-13**

Pulse sequence **DEPT**  
Solvent **cdcl3**

Temperature **25**  
Spectrometer **Agilent-NMR-inova500**

Study owner **vnmr2**  
Operator **vnmr2**

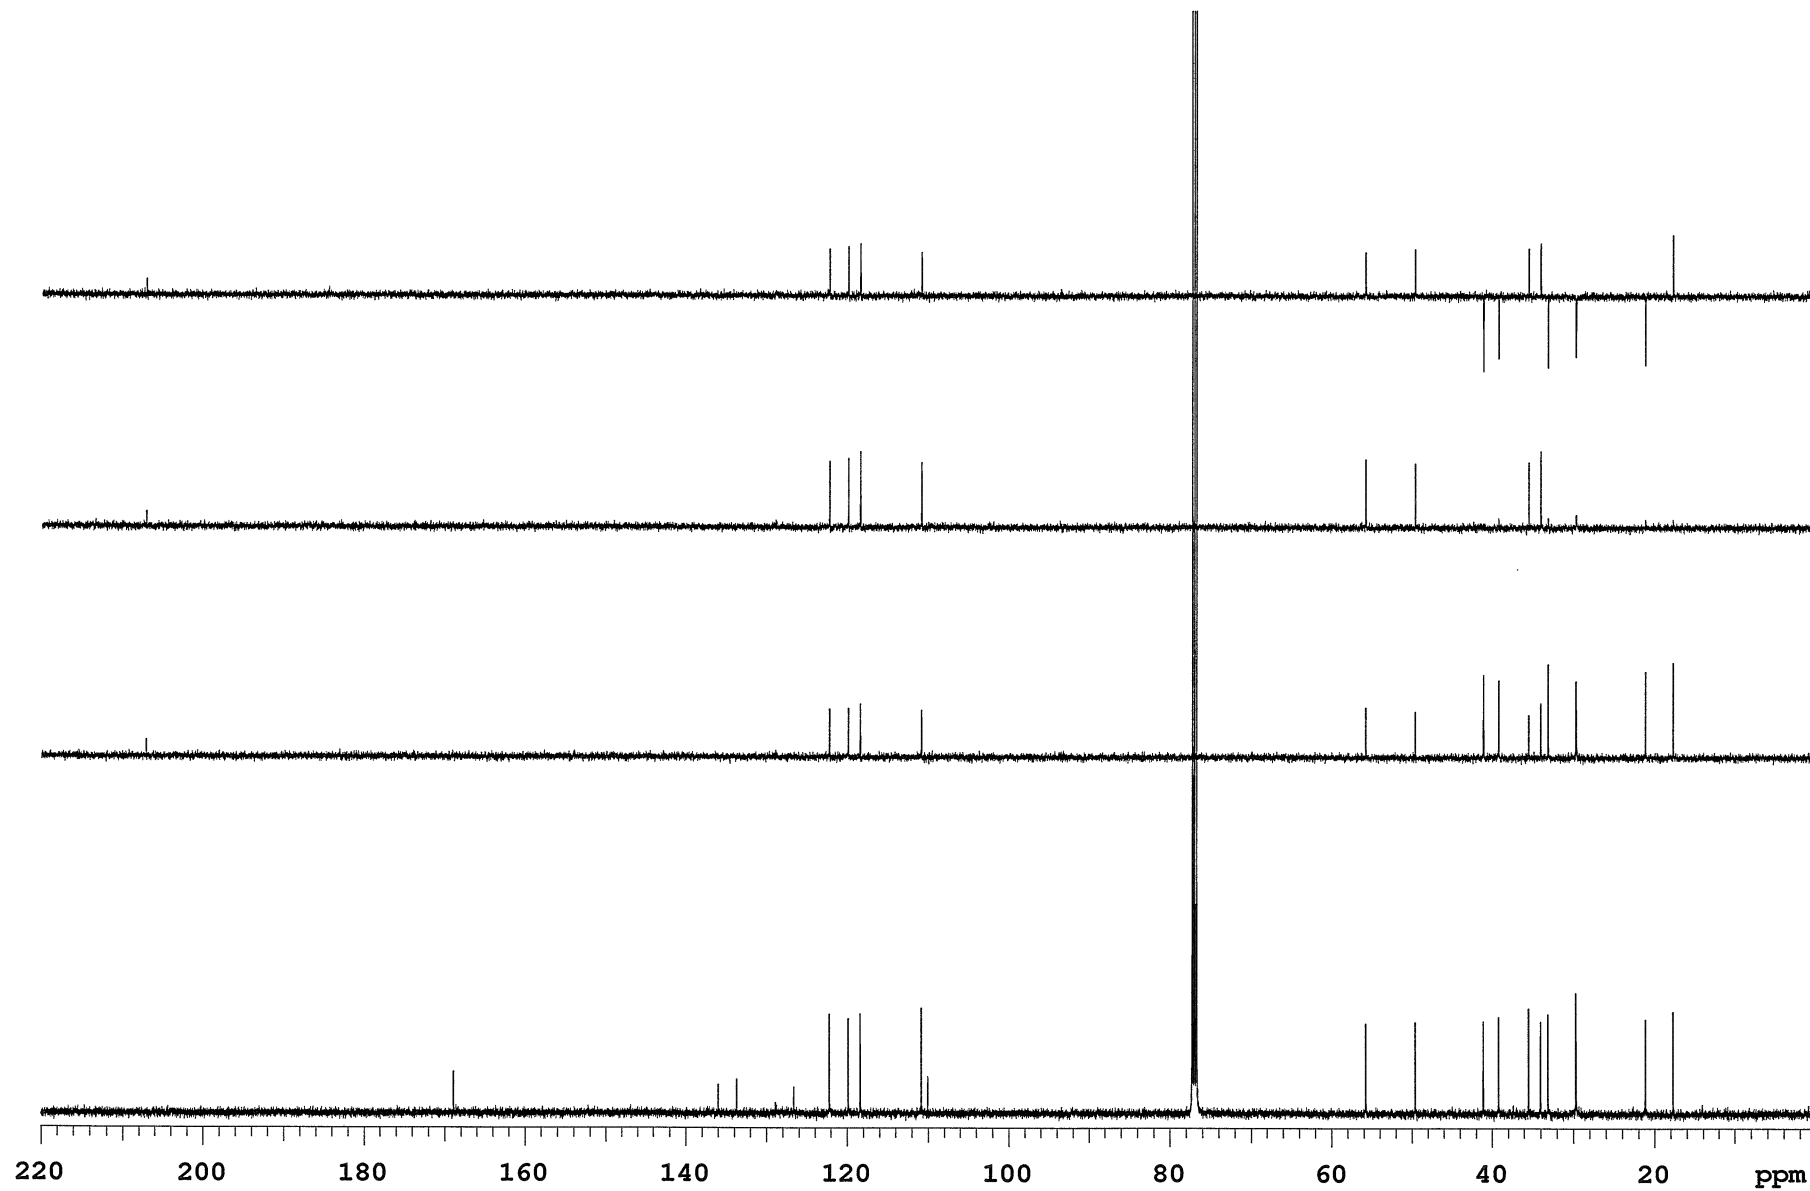

DEPT of compound 11a

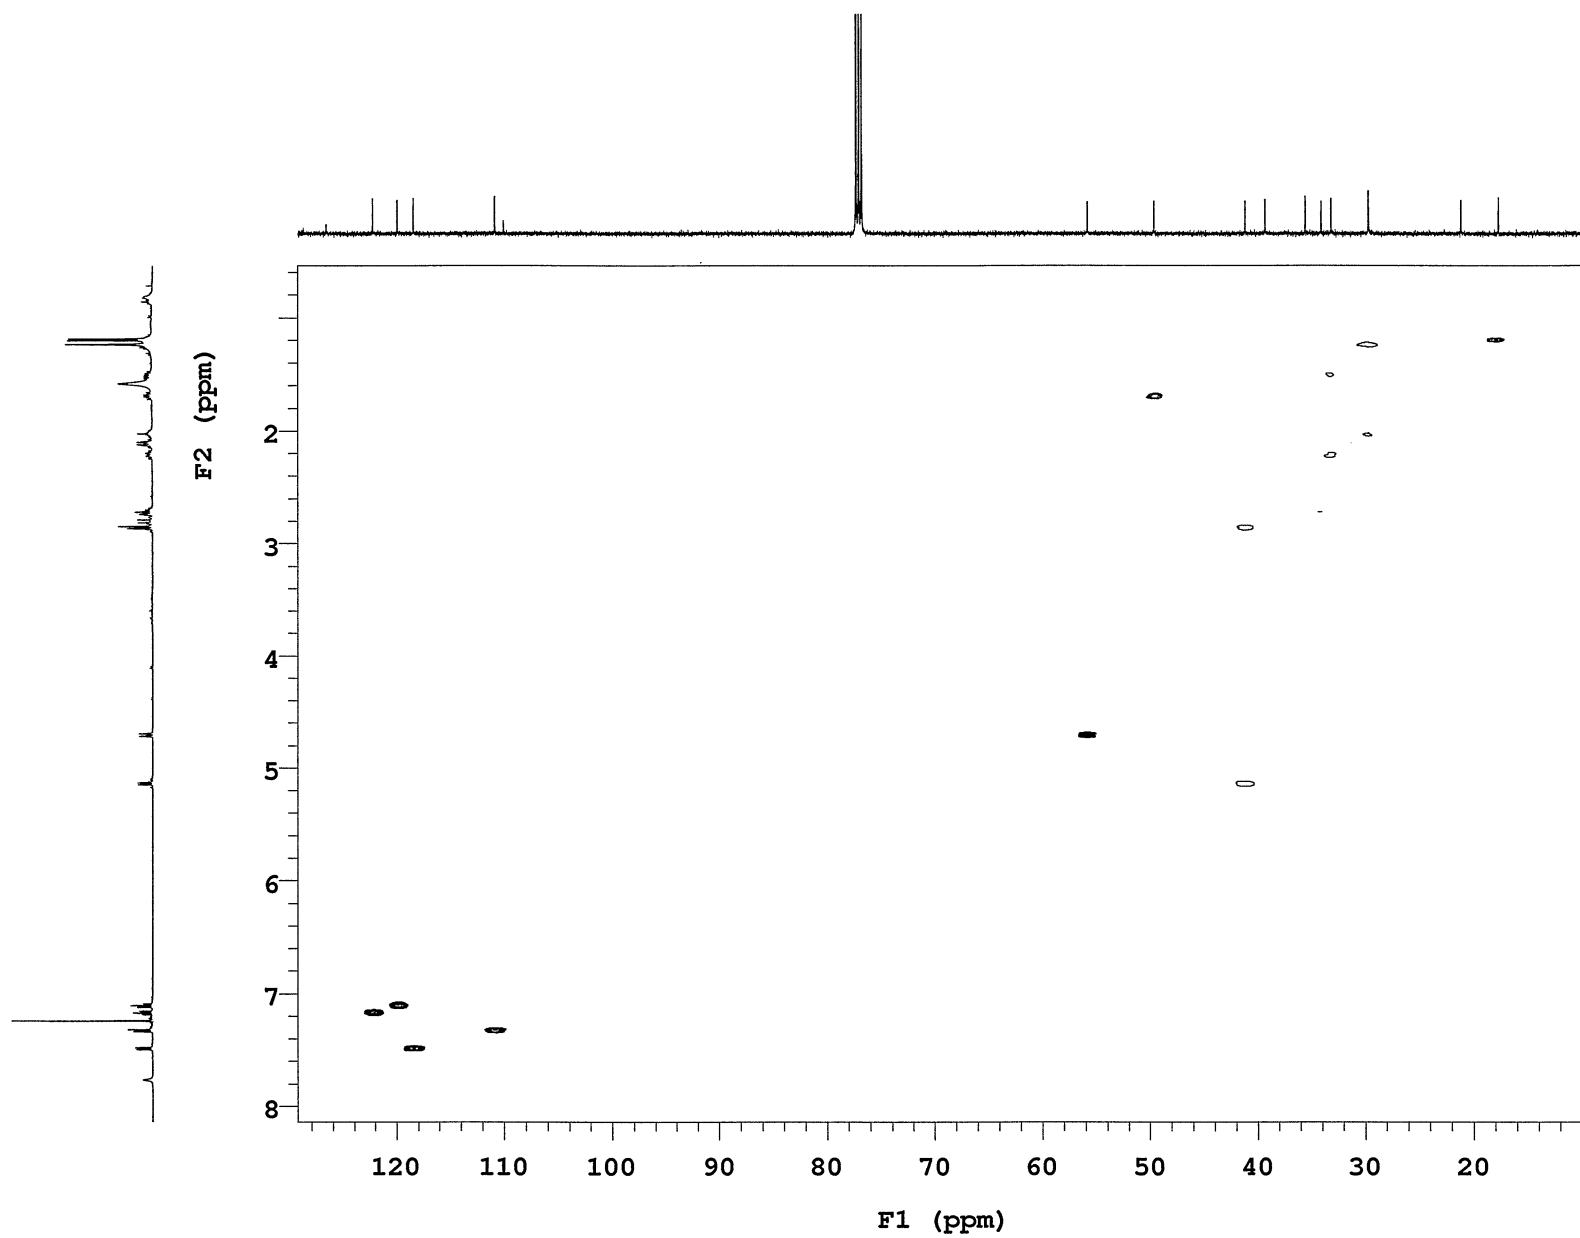

HSQC of compound 11a

Sample Name RRT-04-064-I  
Date collected 2022-10-14

Pulse sequence gCOSY  
Solvent cdcl3

Temperature 25  
Spectrometer Agilent-NMR-inova500

Study owner vnmr2  
Operator vnmr2

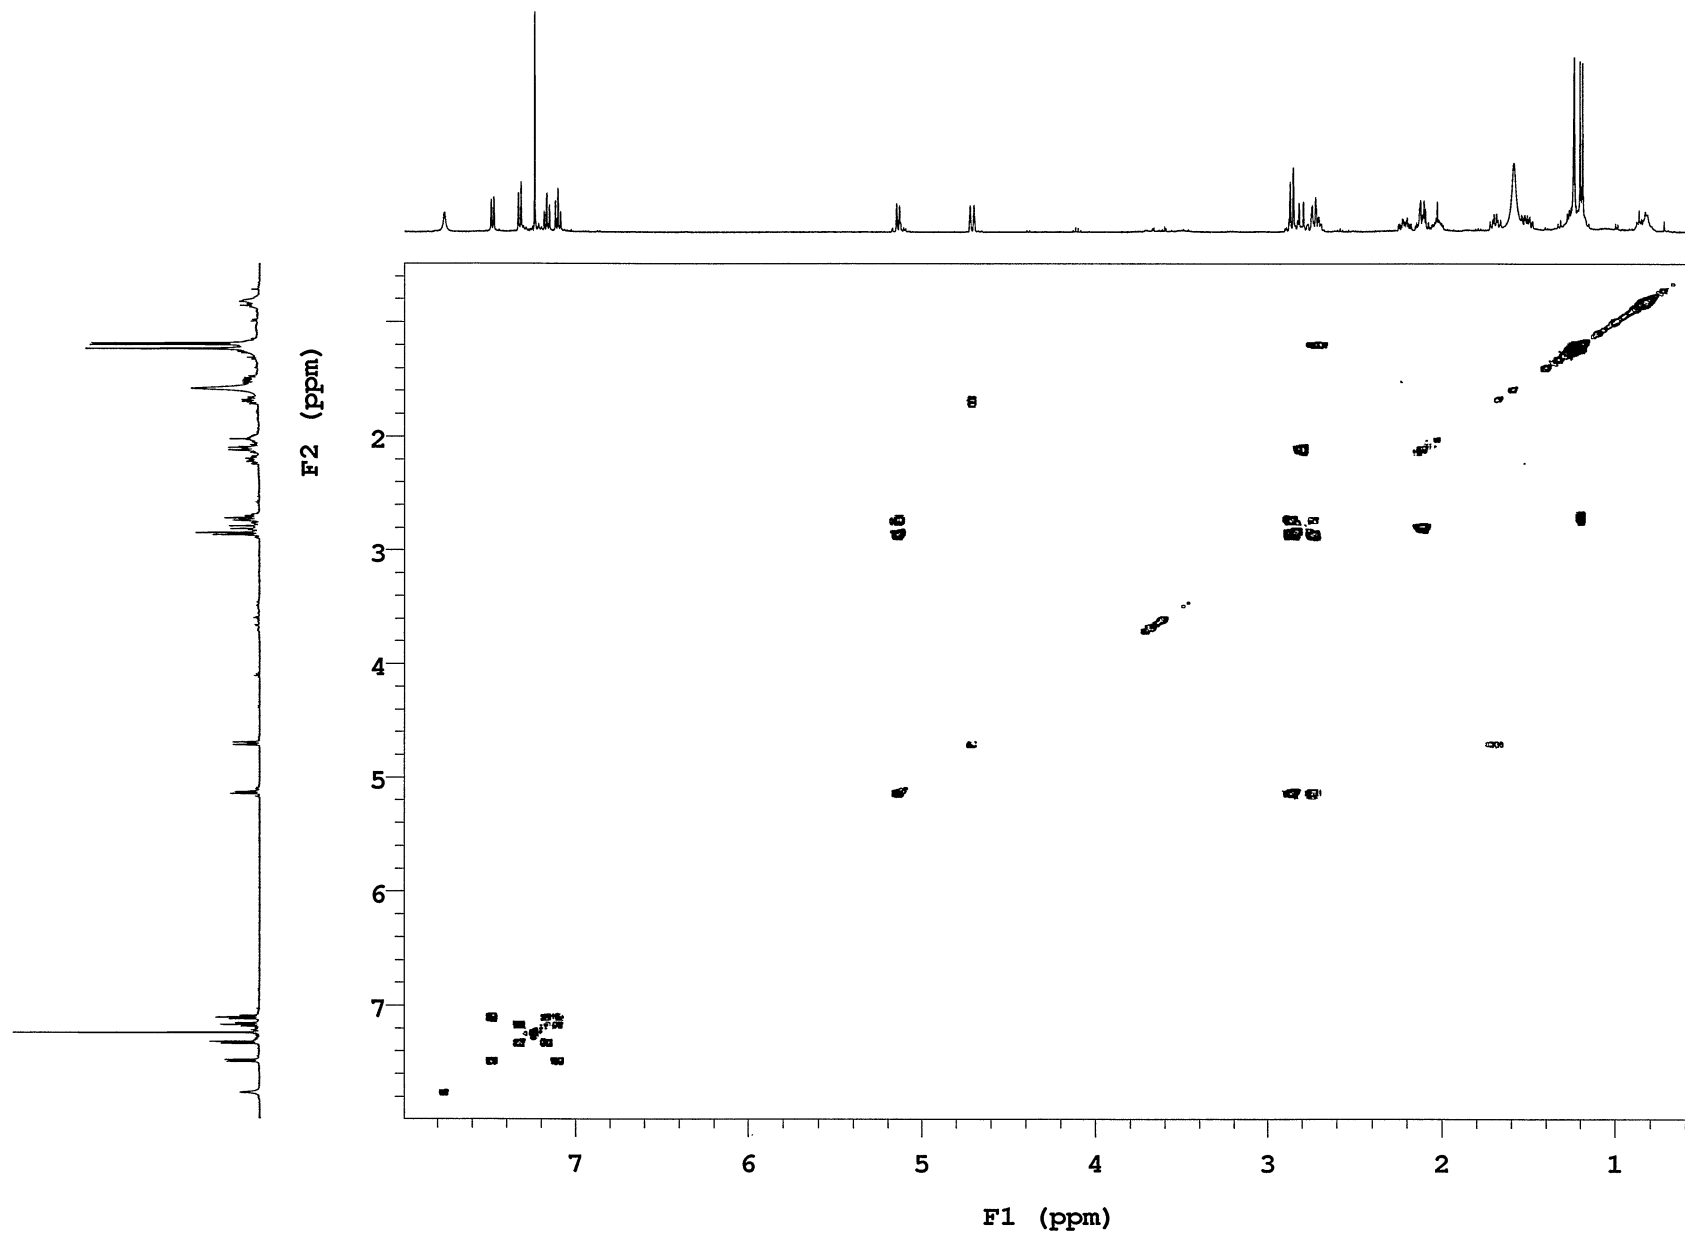

COSY of compound 11a

Sample Name RRT-04-064-I  
Date collected 2022-10-14

Pulse sequence NOESY  
Solvent cdcl3

Temperature 25  
Spectrometer Agilent-NMR-inova500

Study owner vnmr2  
Operator vnmr2

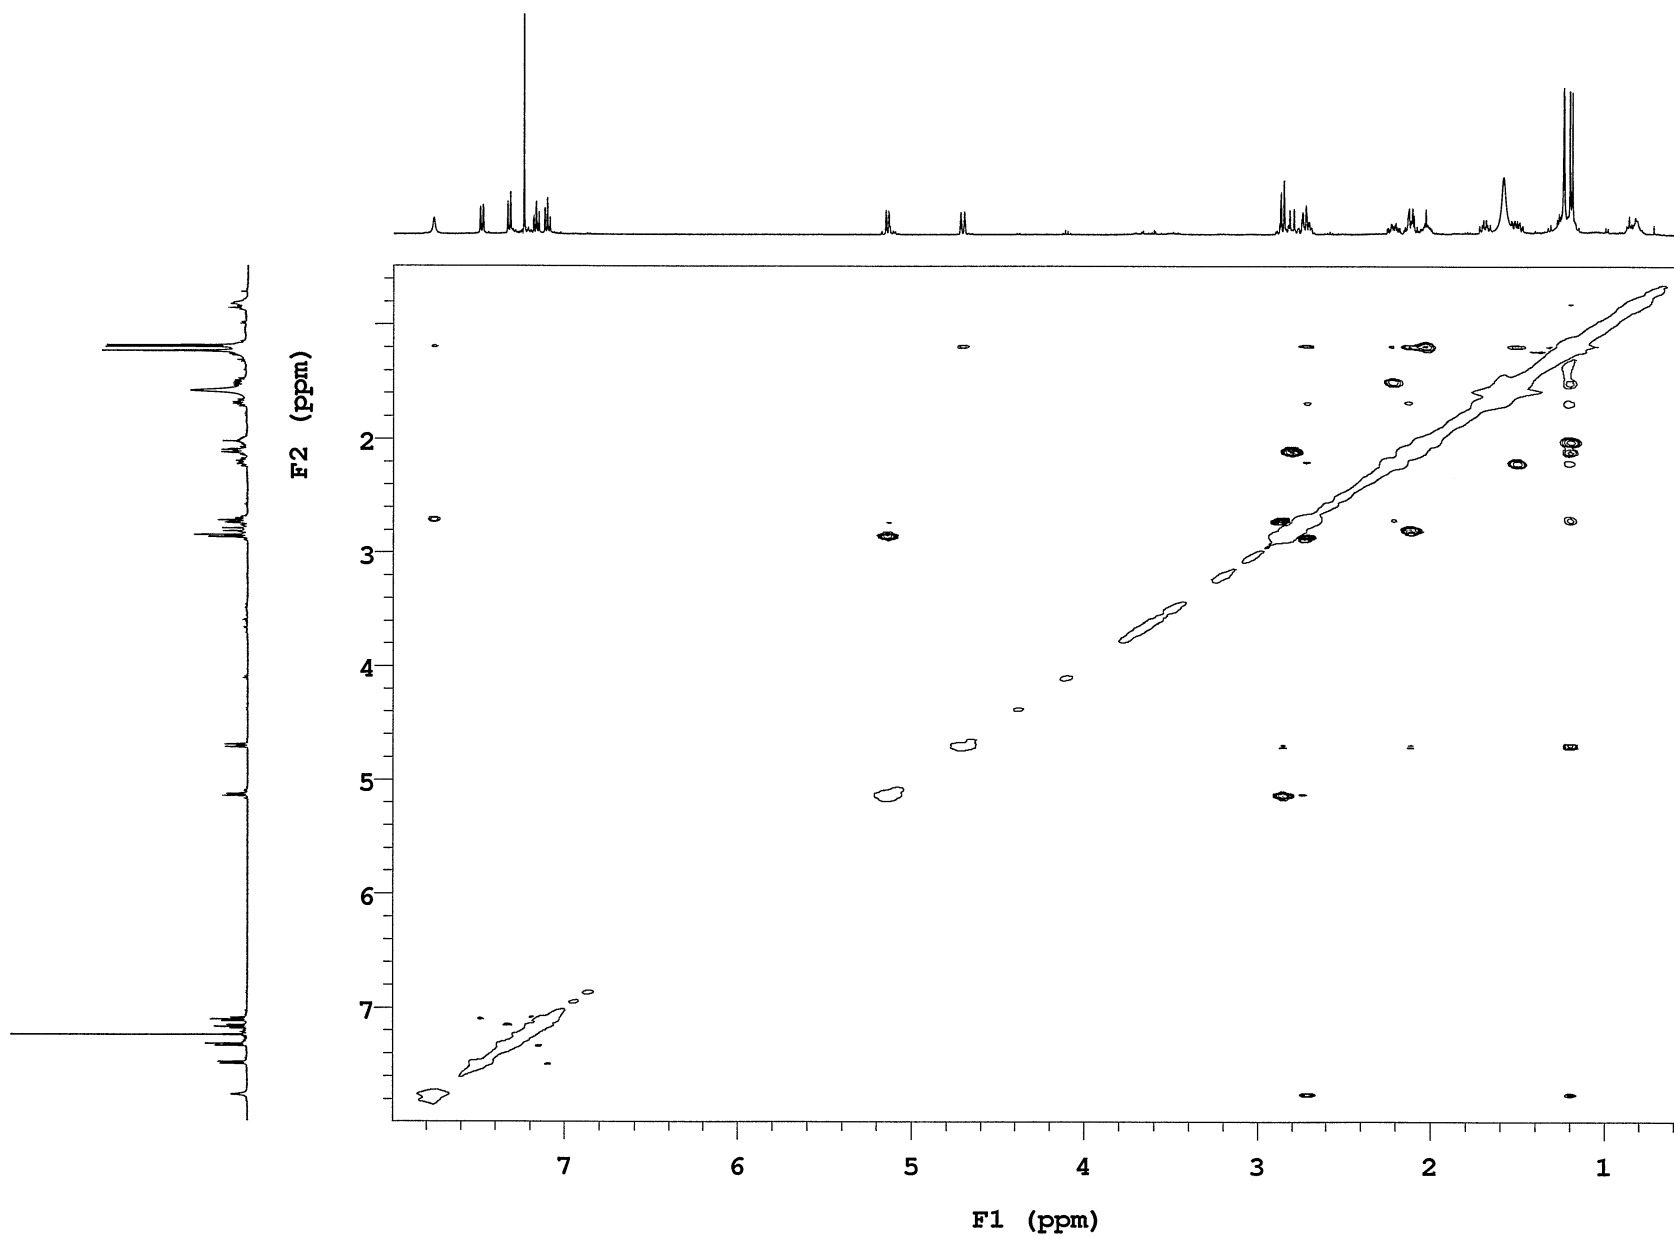

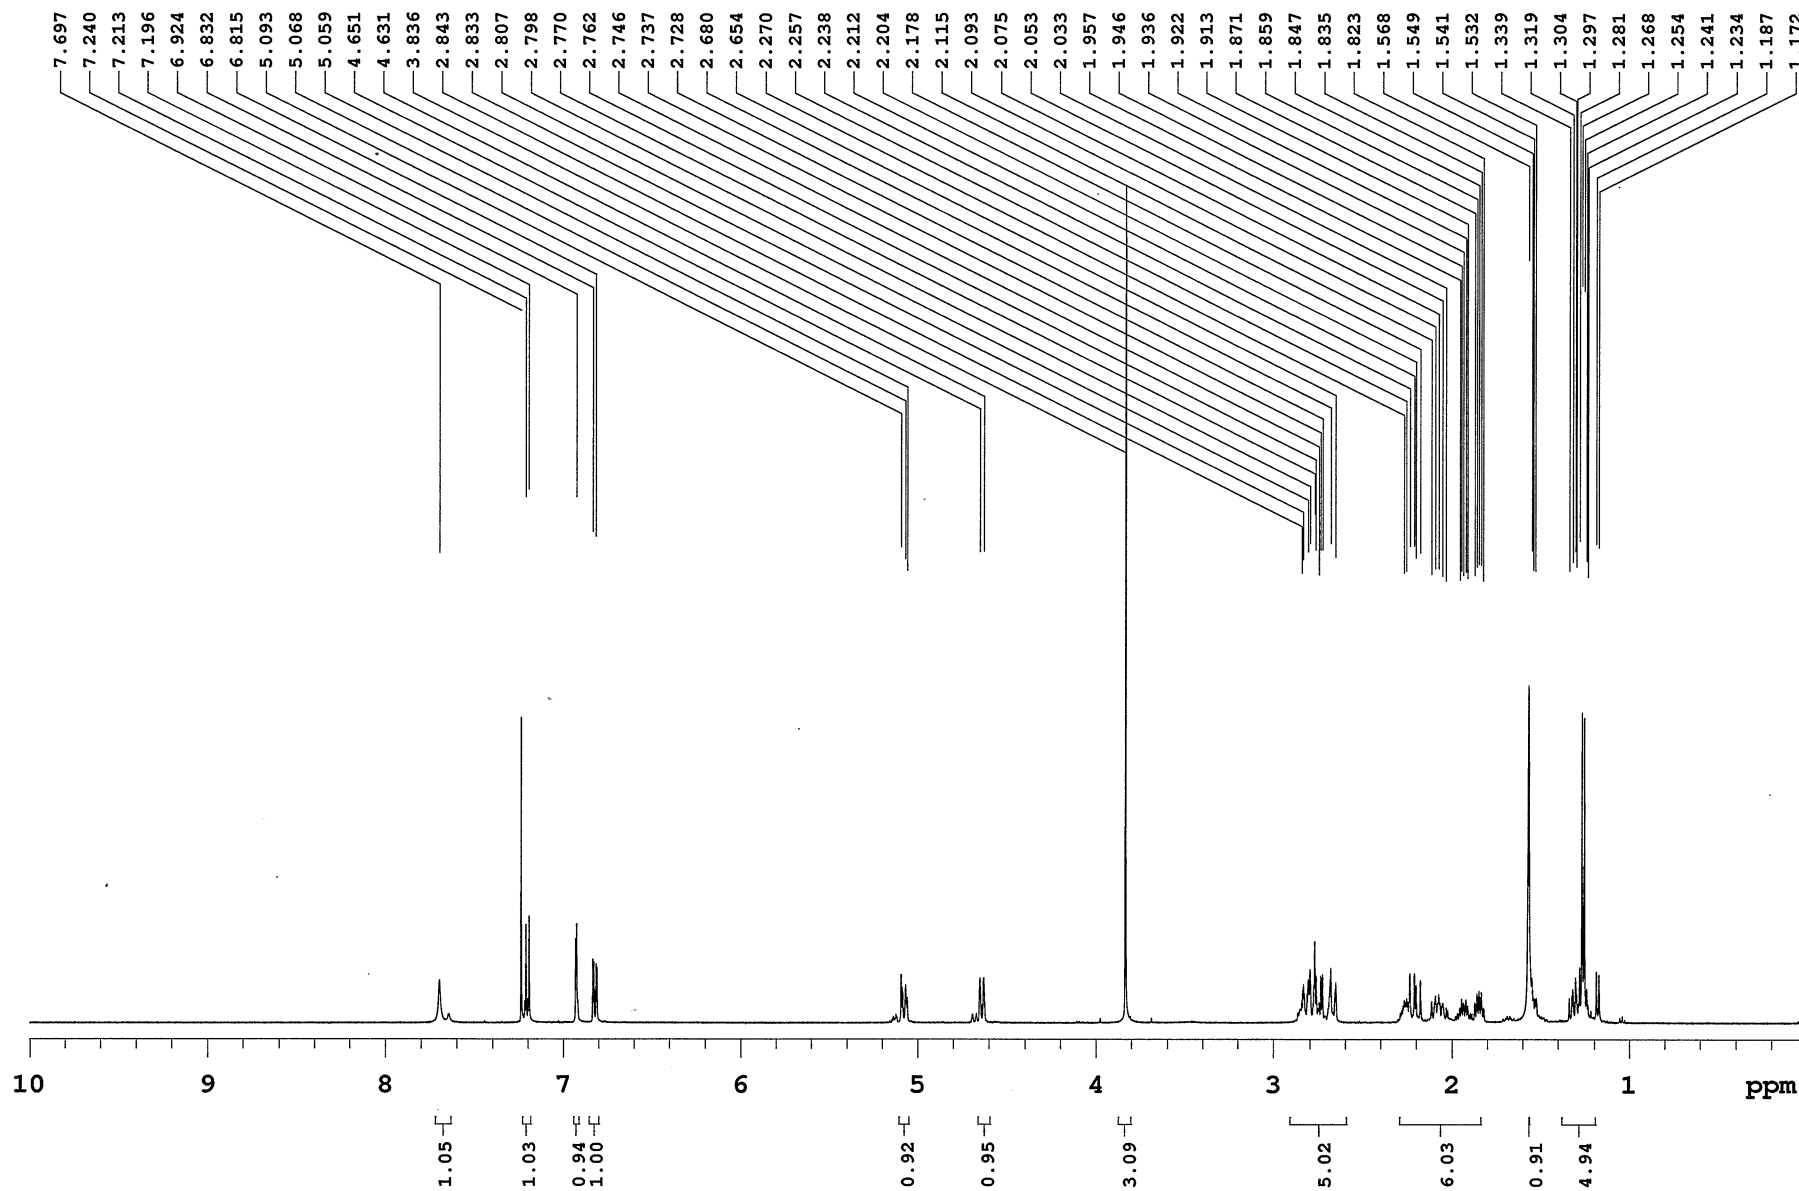

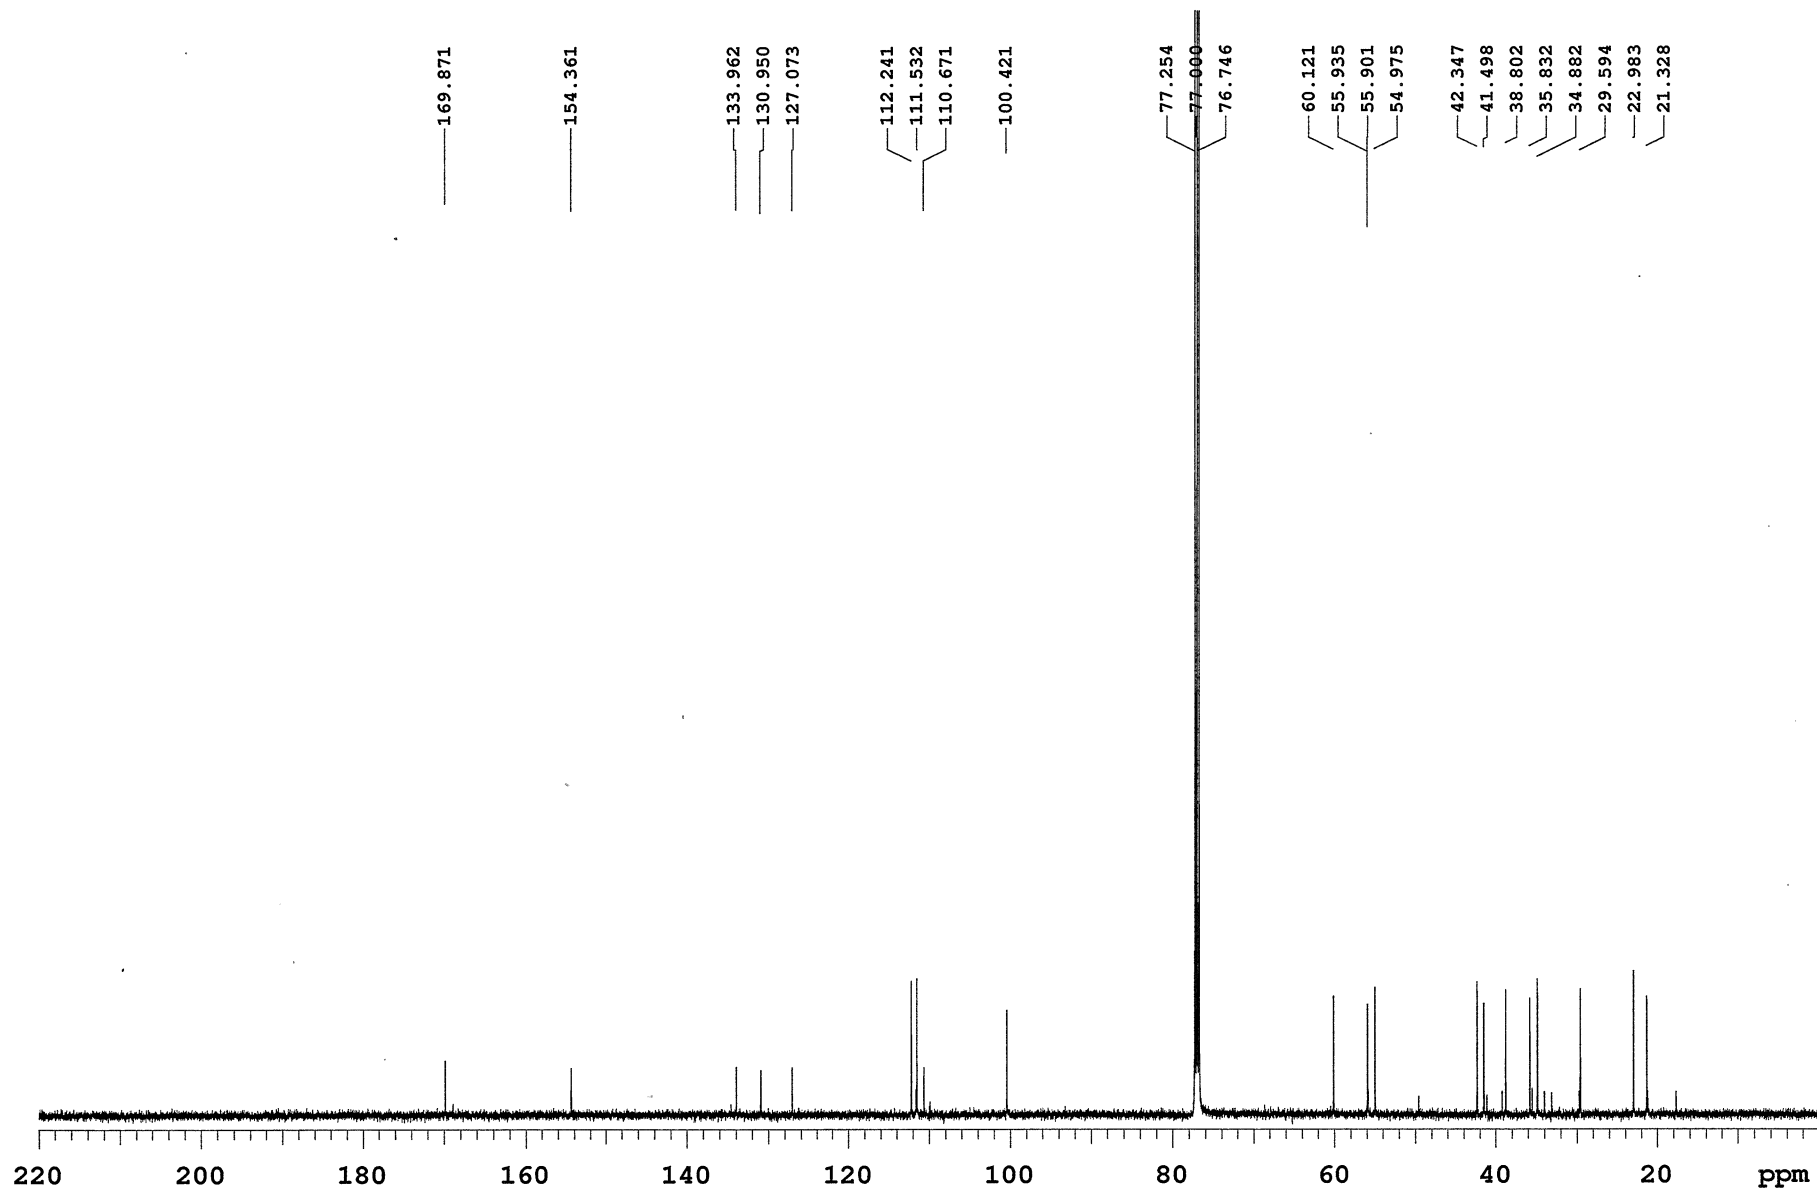13C NMR (125 MHz, CDCl<sub>3</sub>) of compound 10b

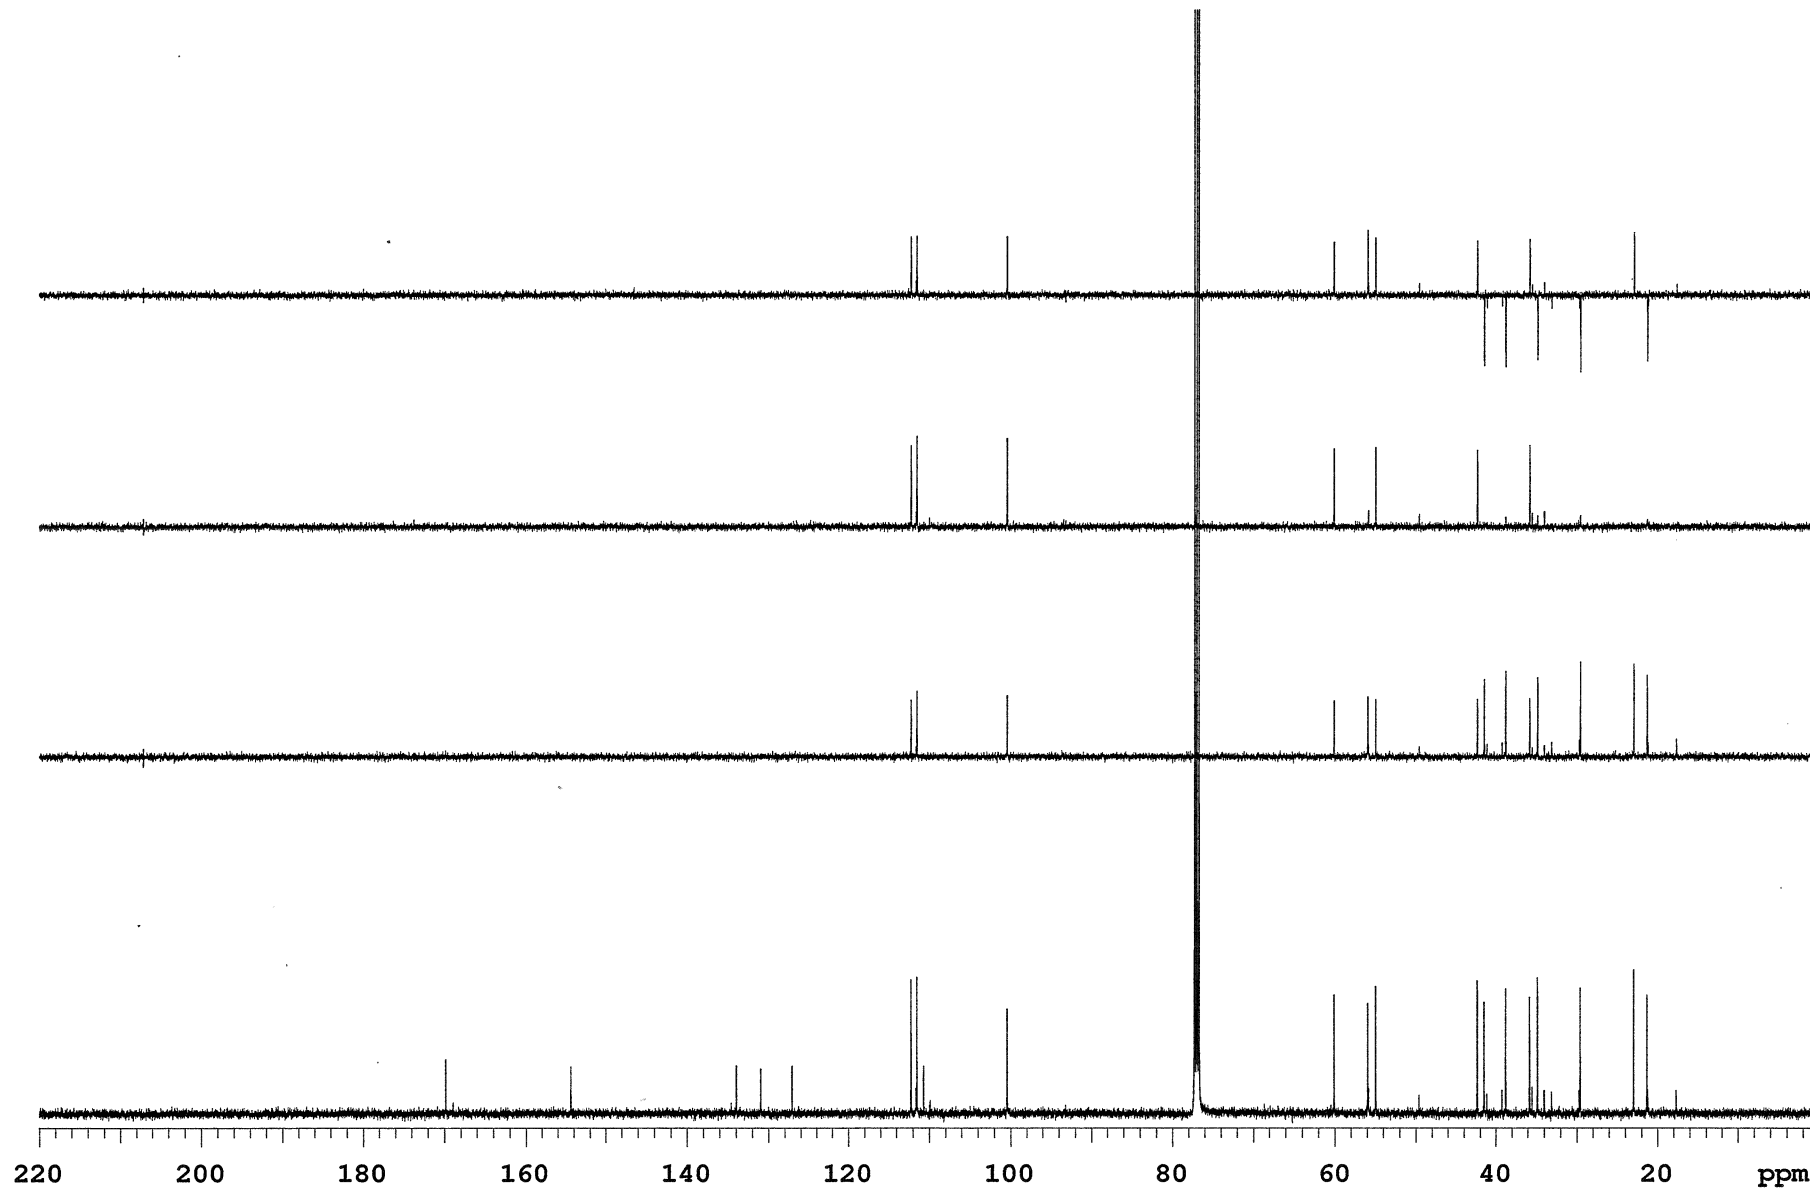

DEPT of compound 10b

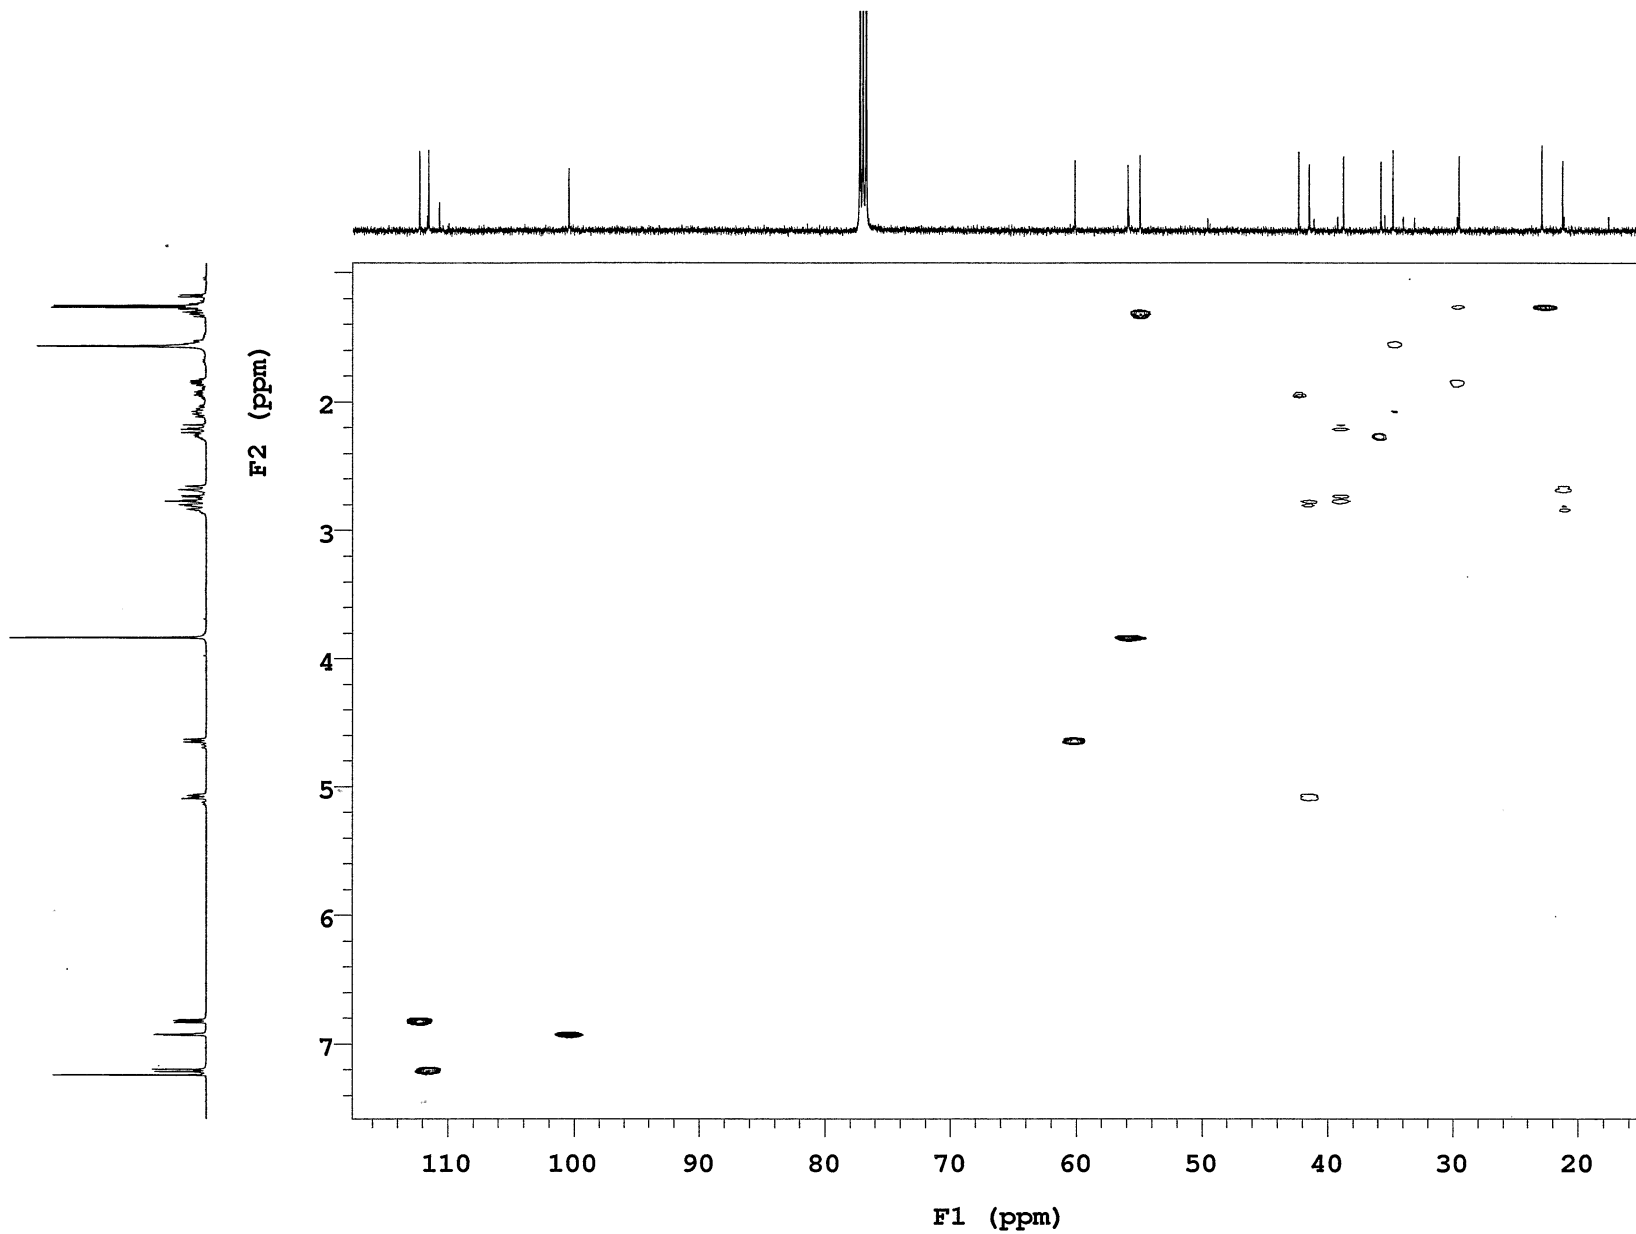



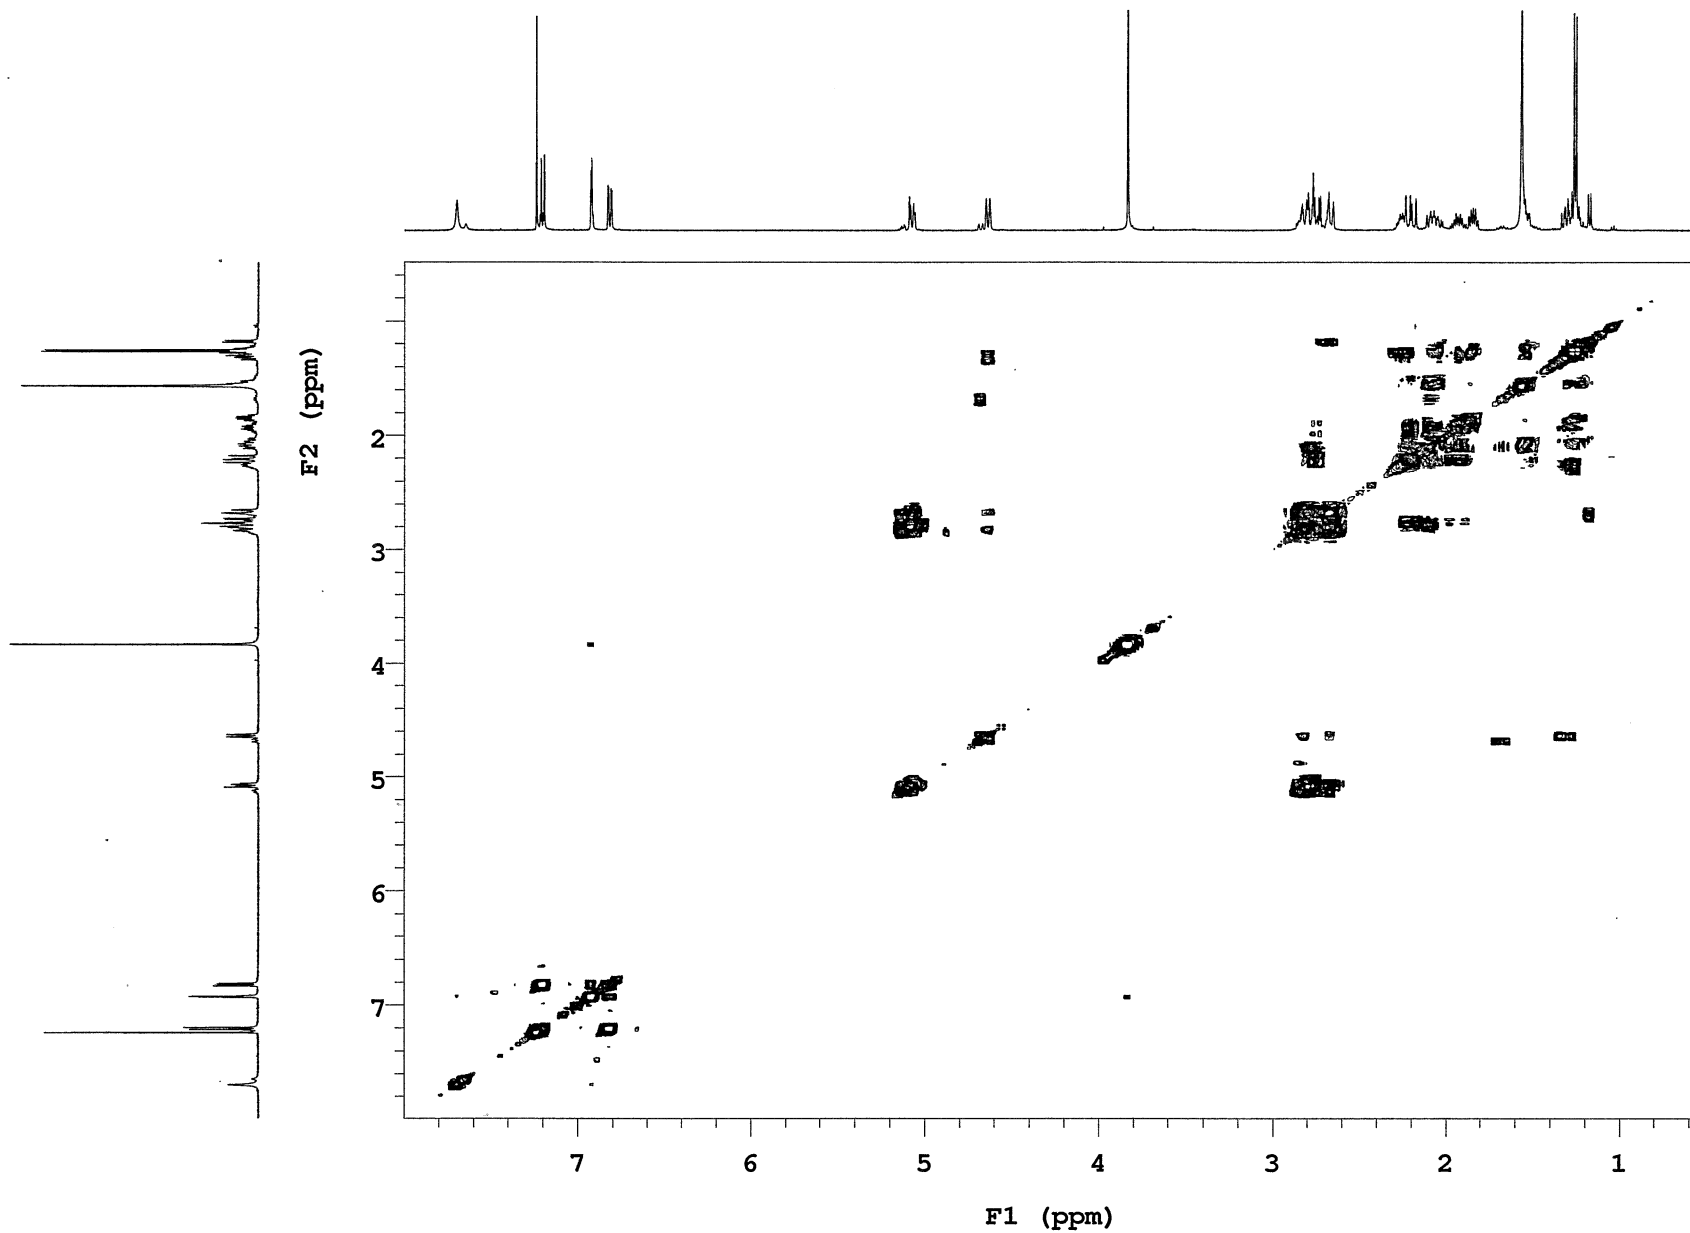

COSY of compound 10b

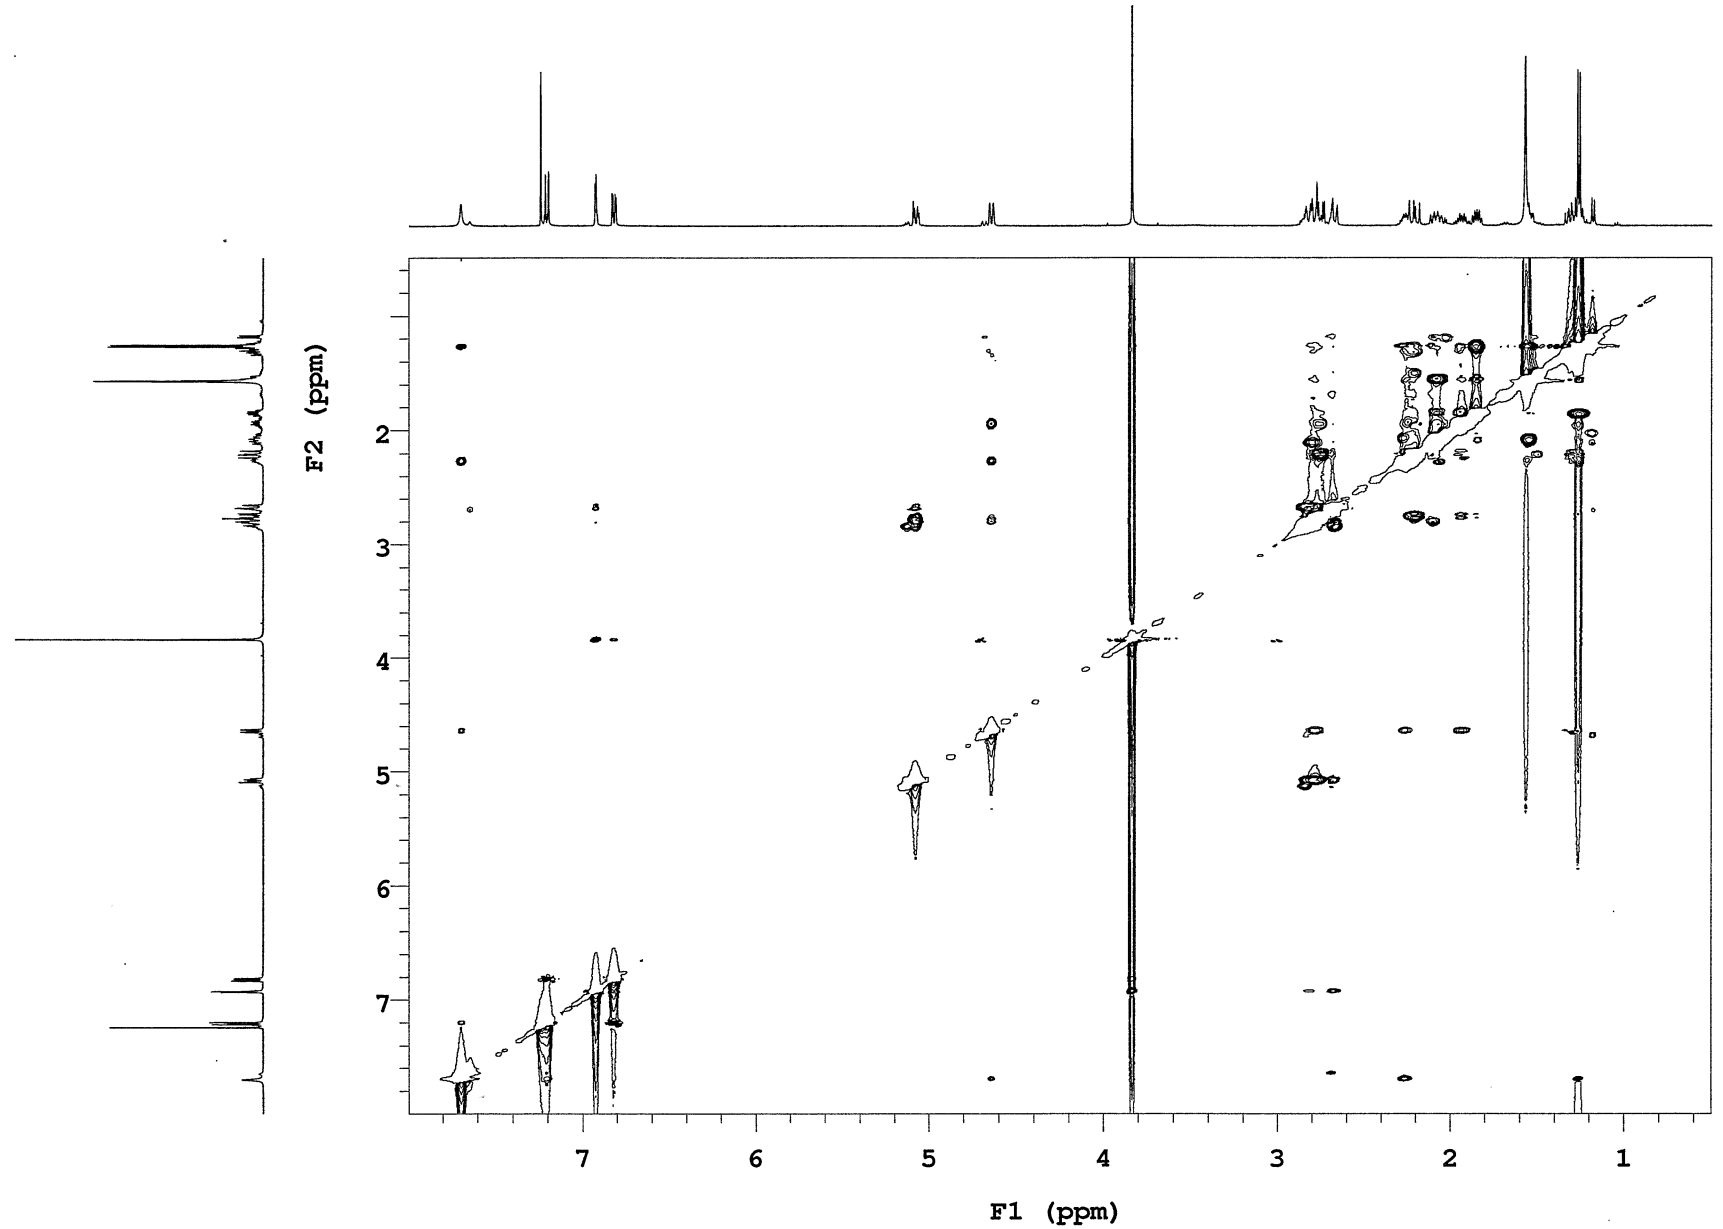

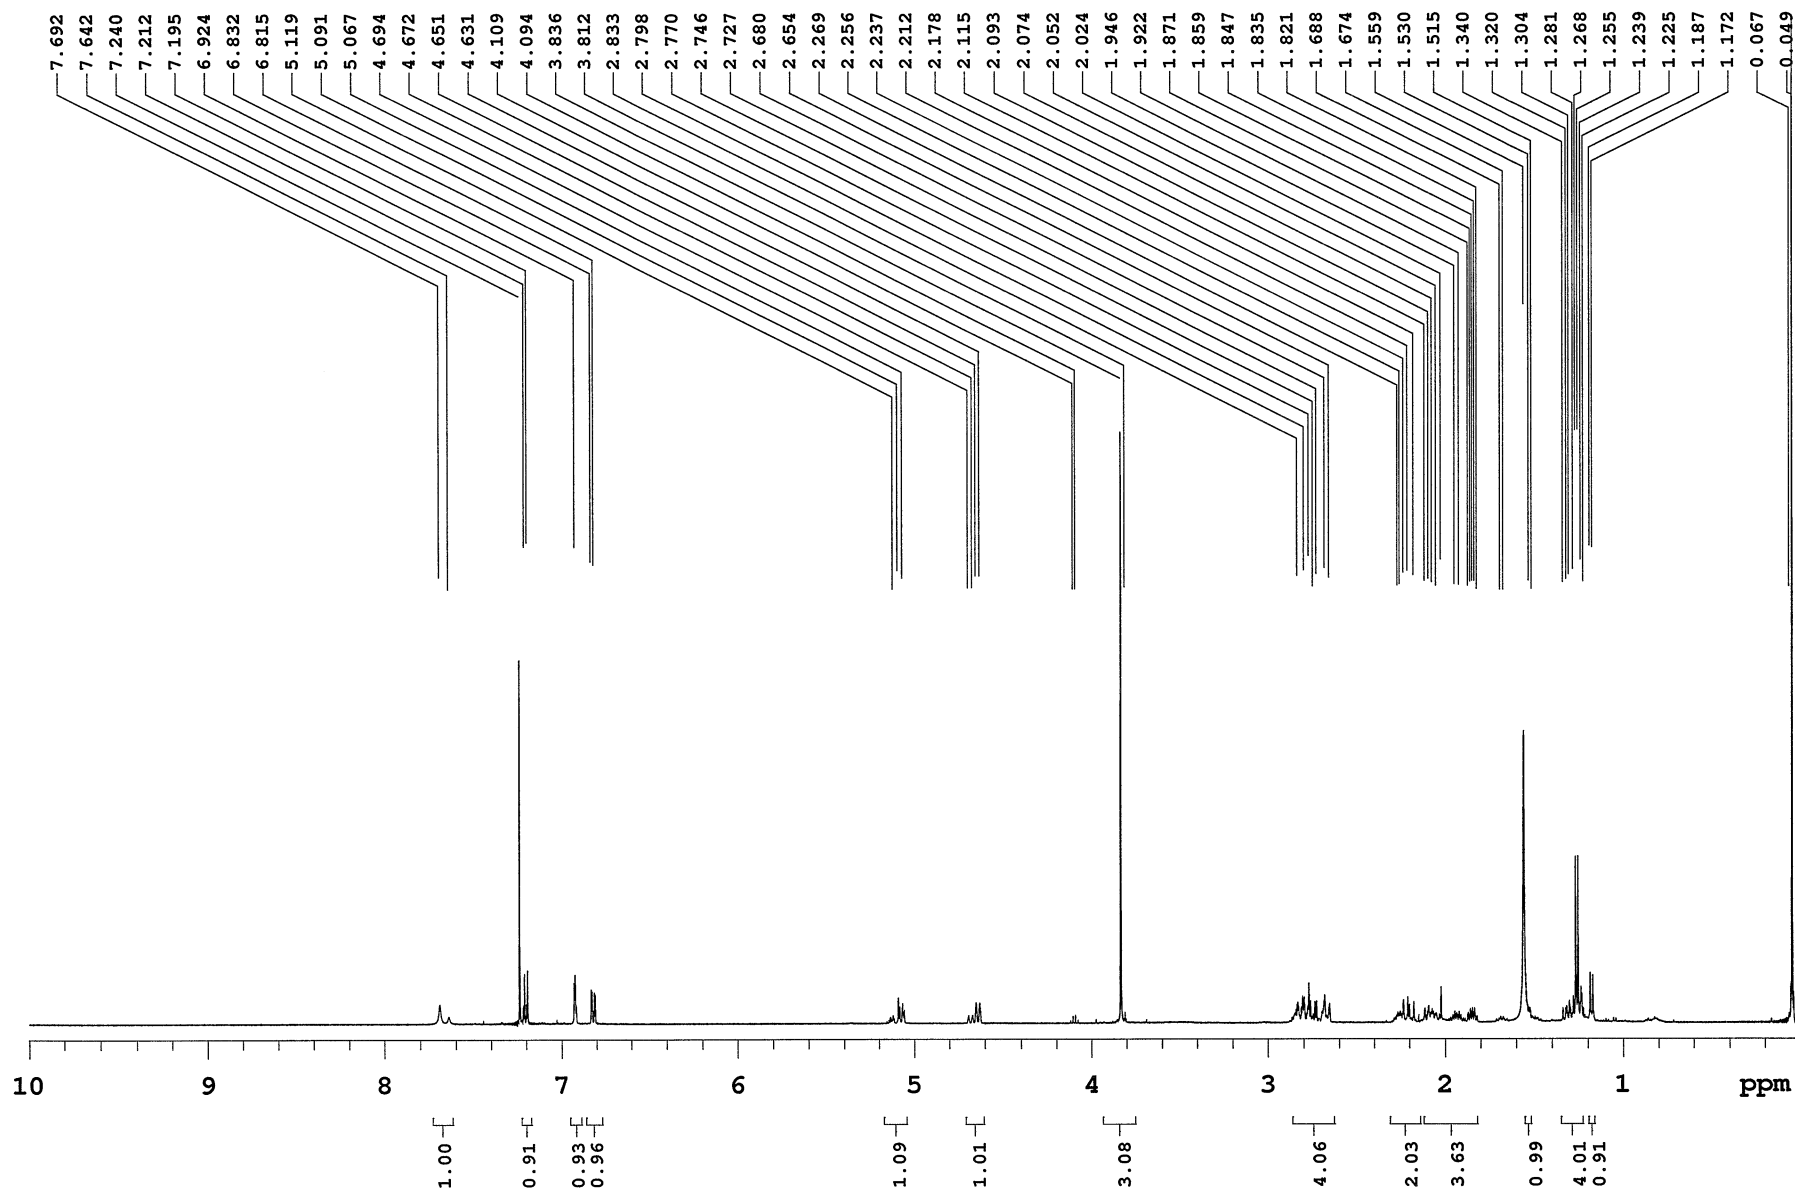

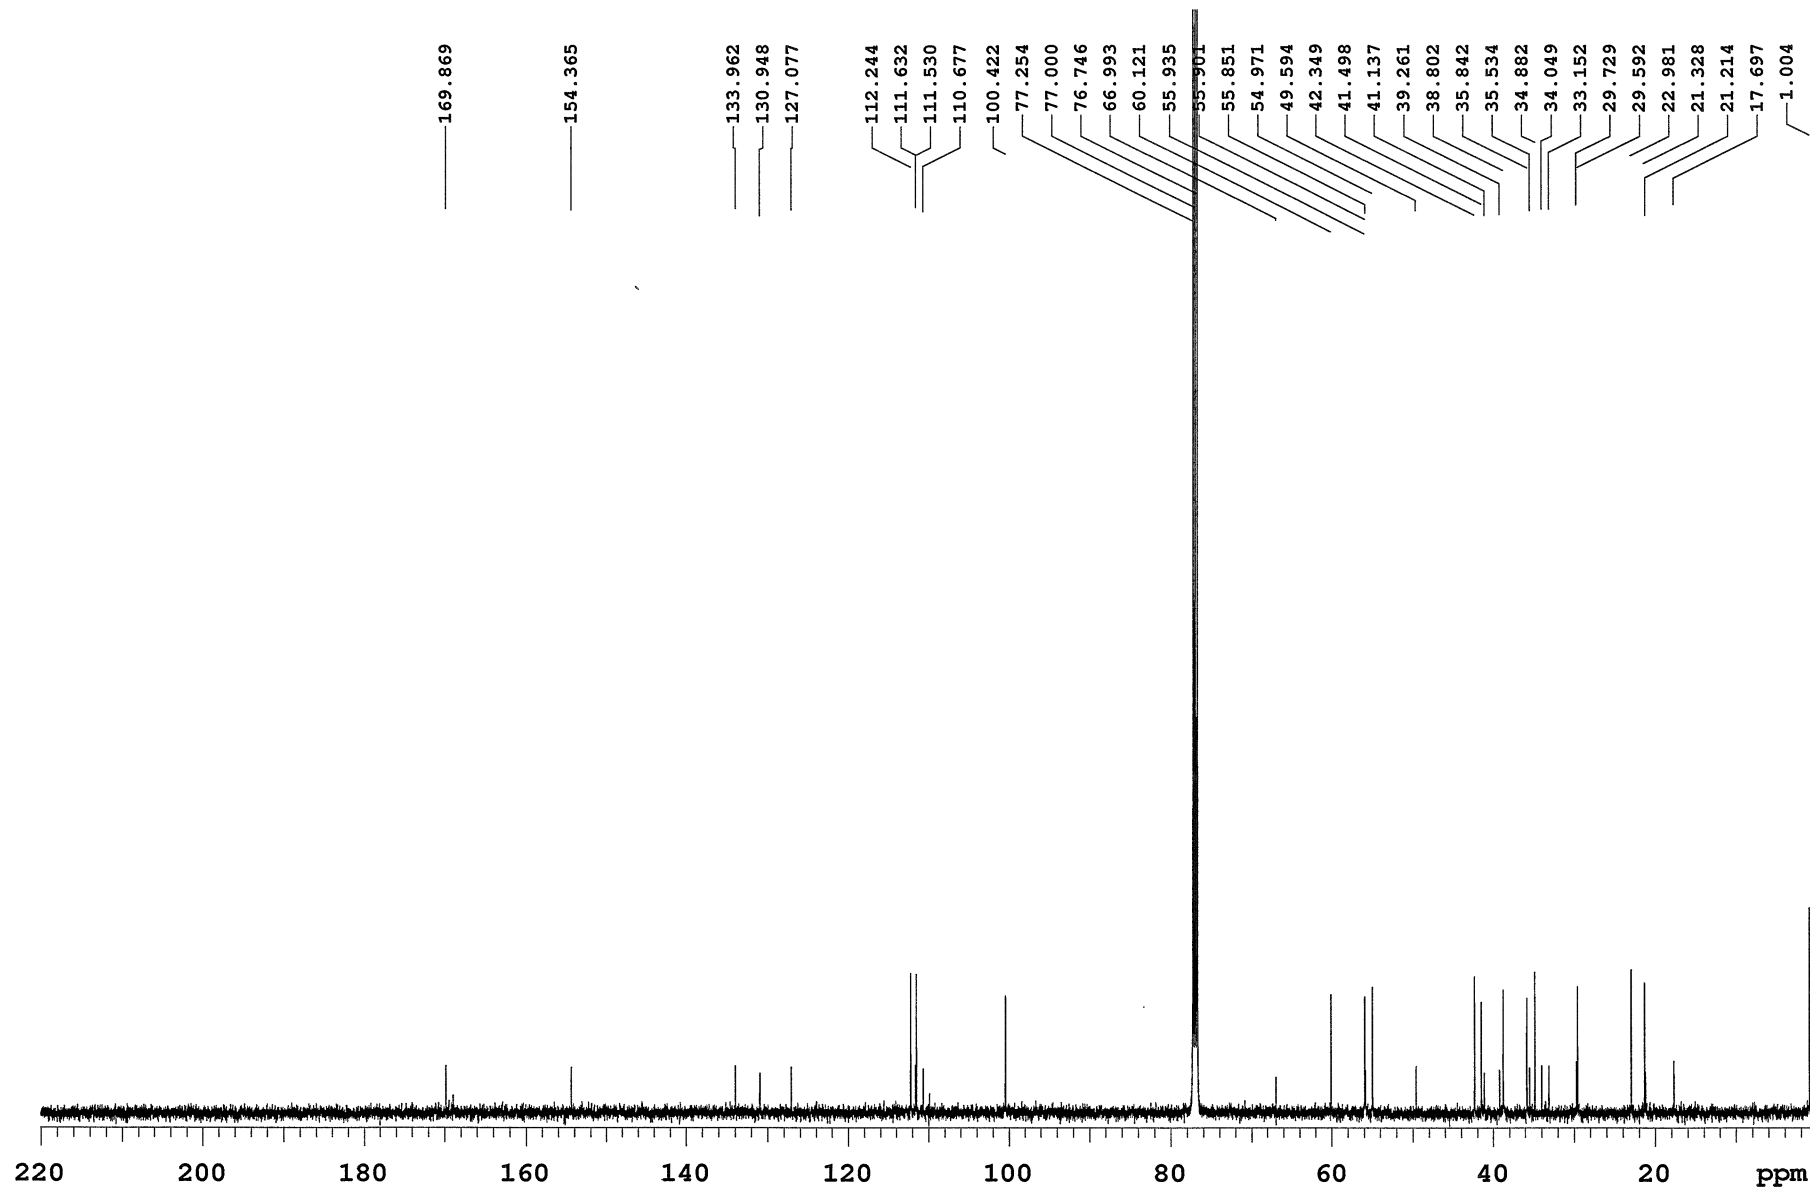

$^{13}\text{C}$  NMR (500 MHz,  $\text{CDCl}_3$ ) of the mixture of **10b** and **11b**

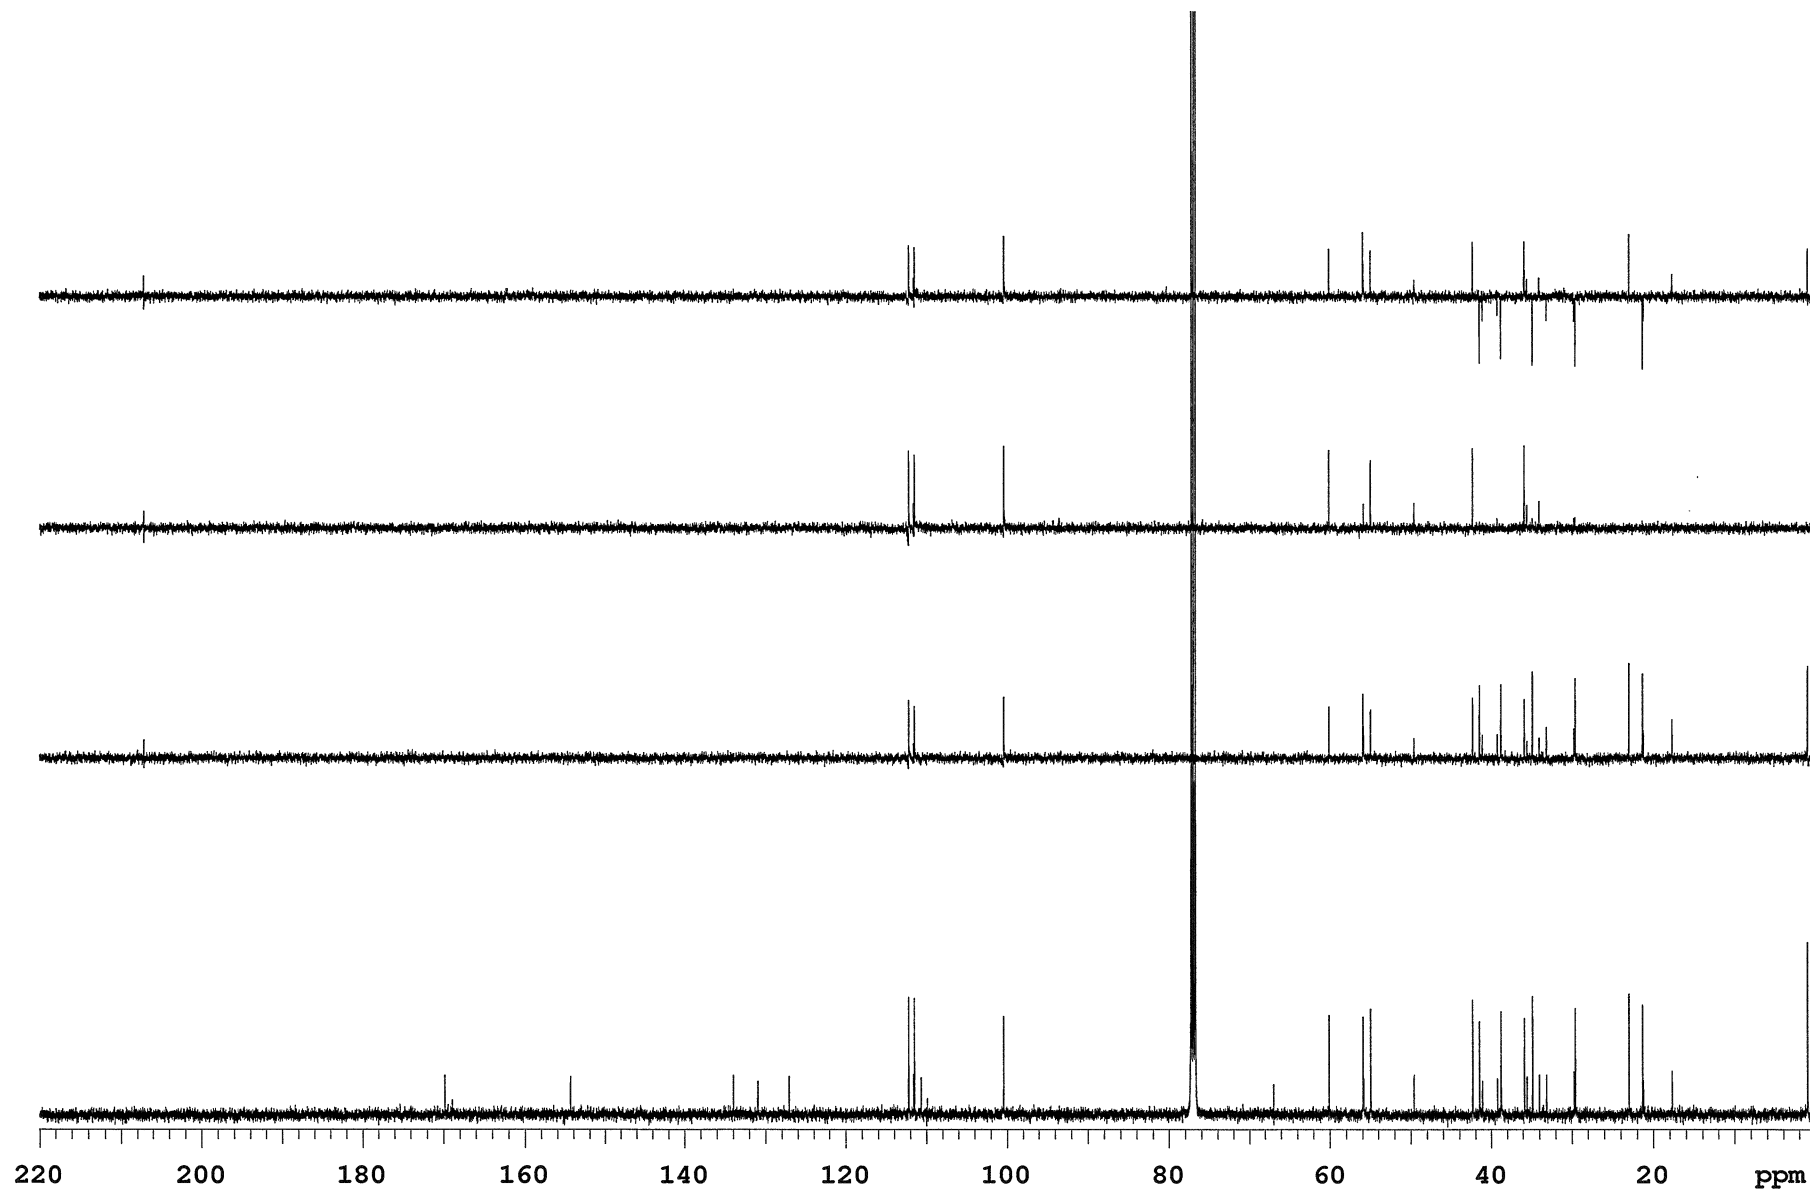

DEPT of the mixture of 10b and 11b

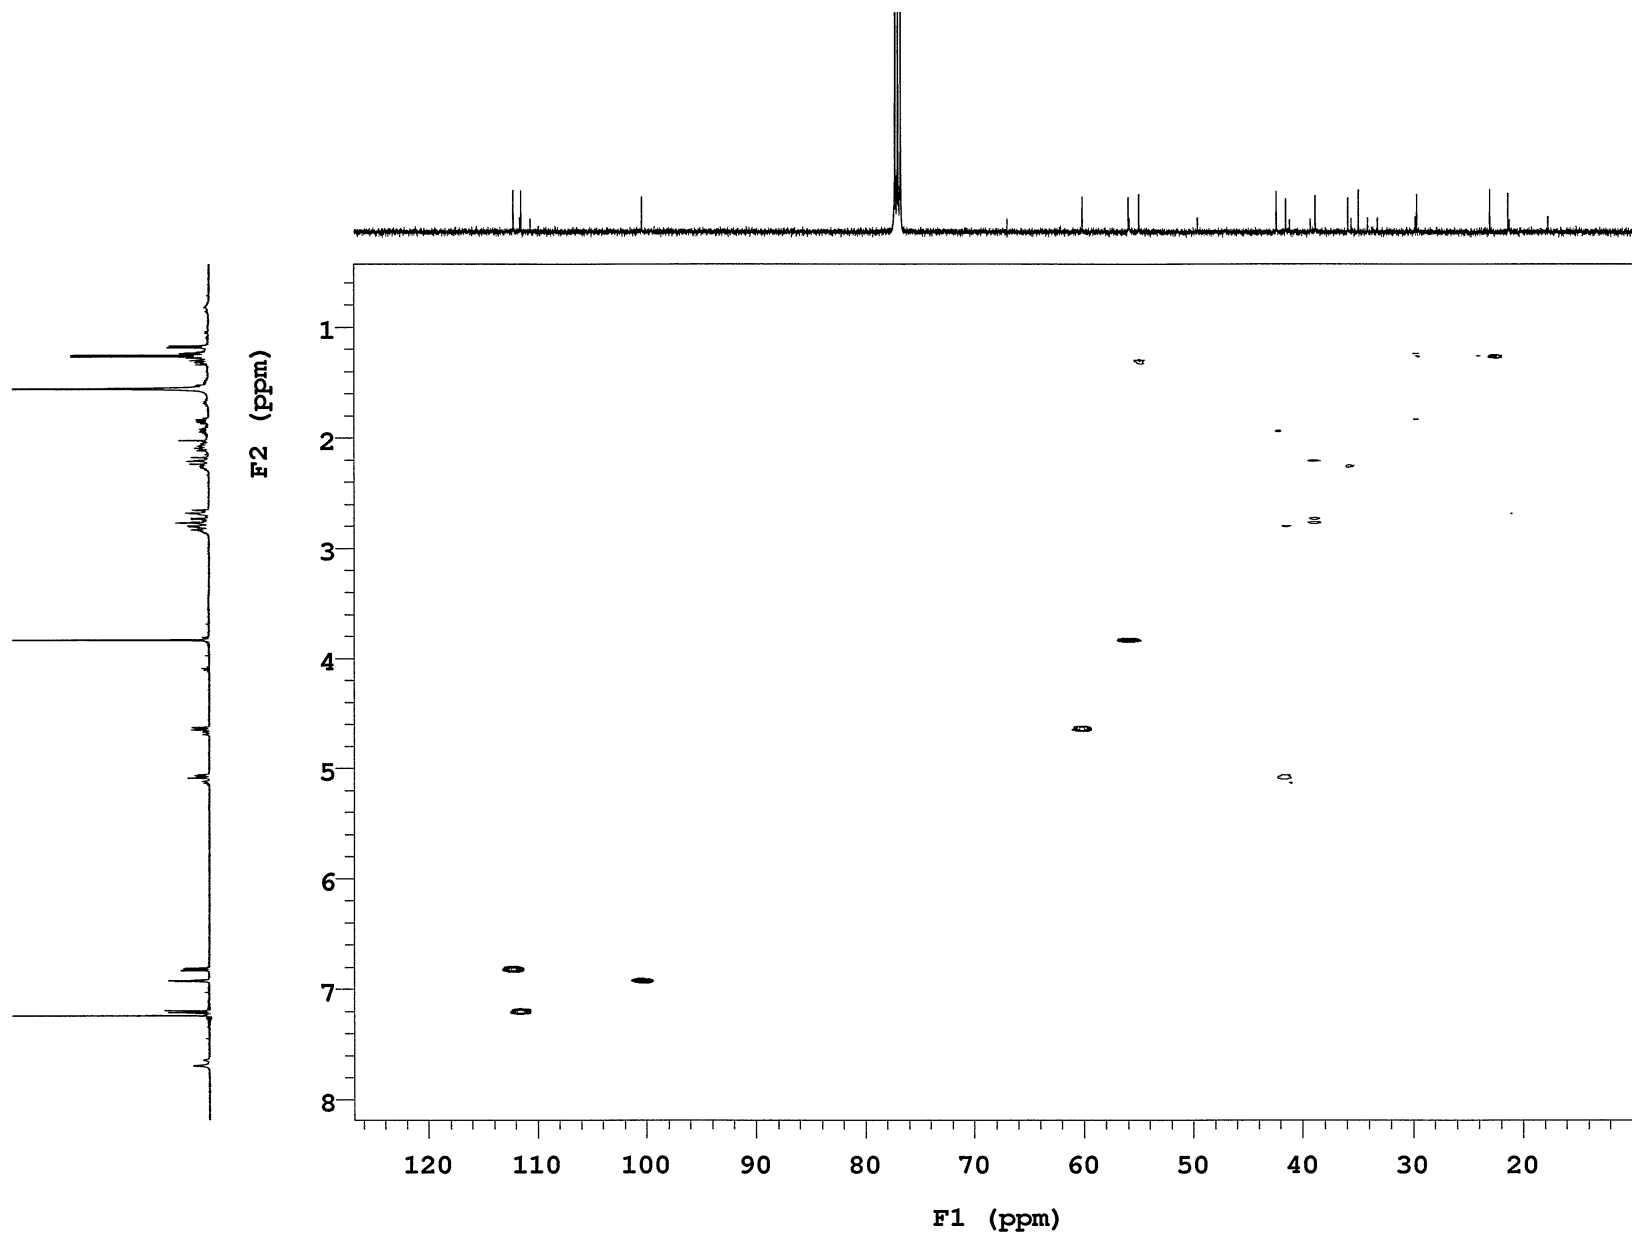

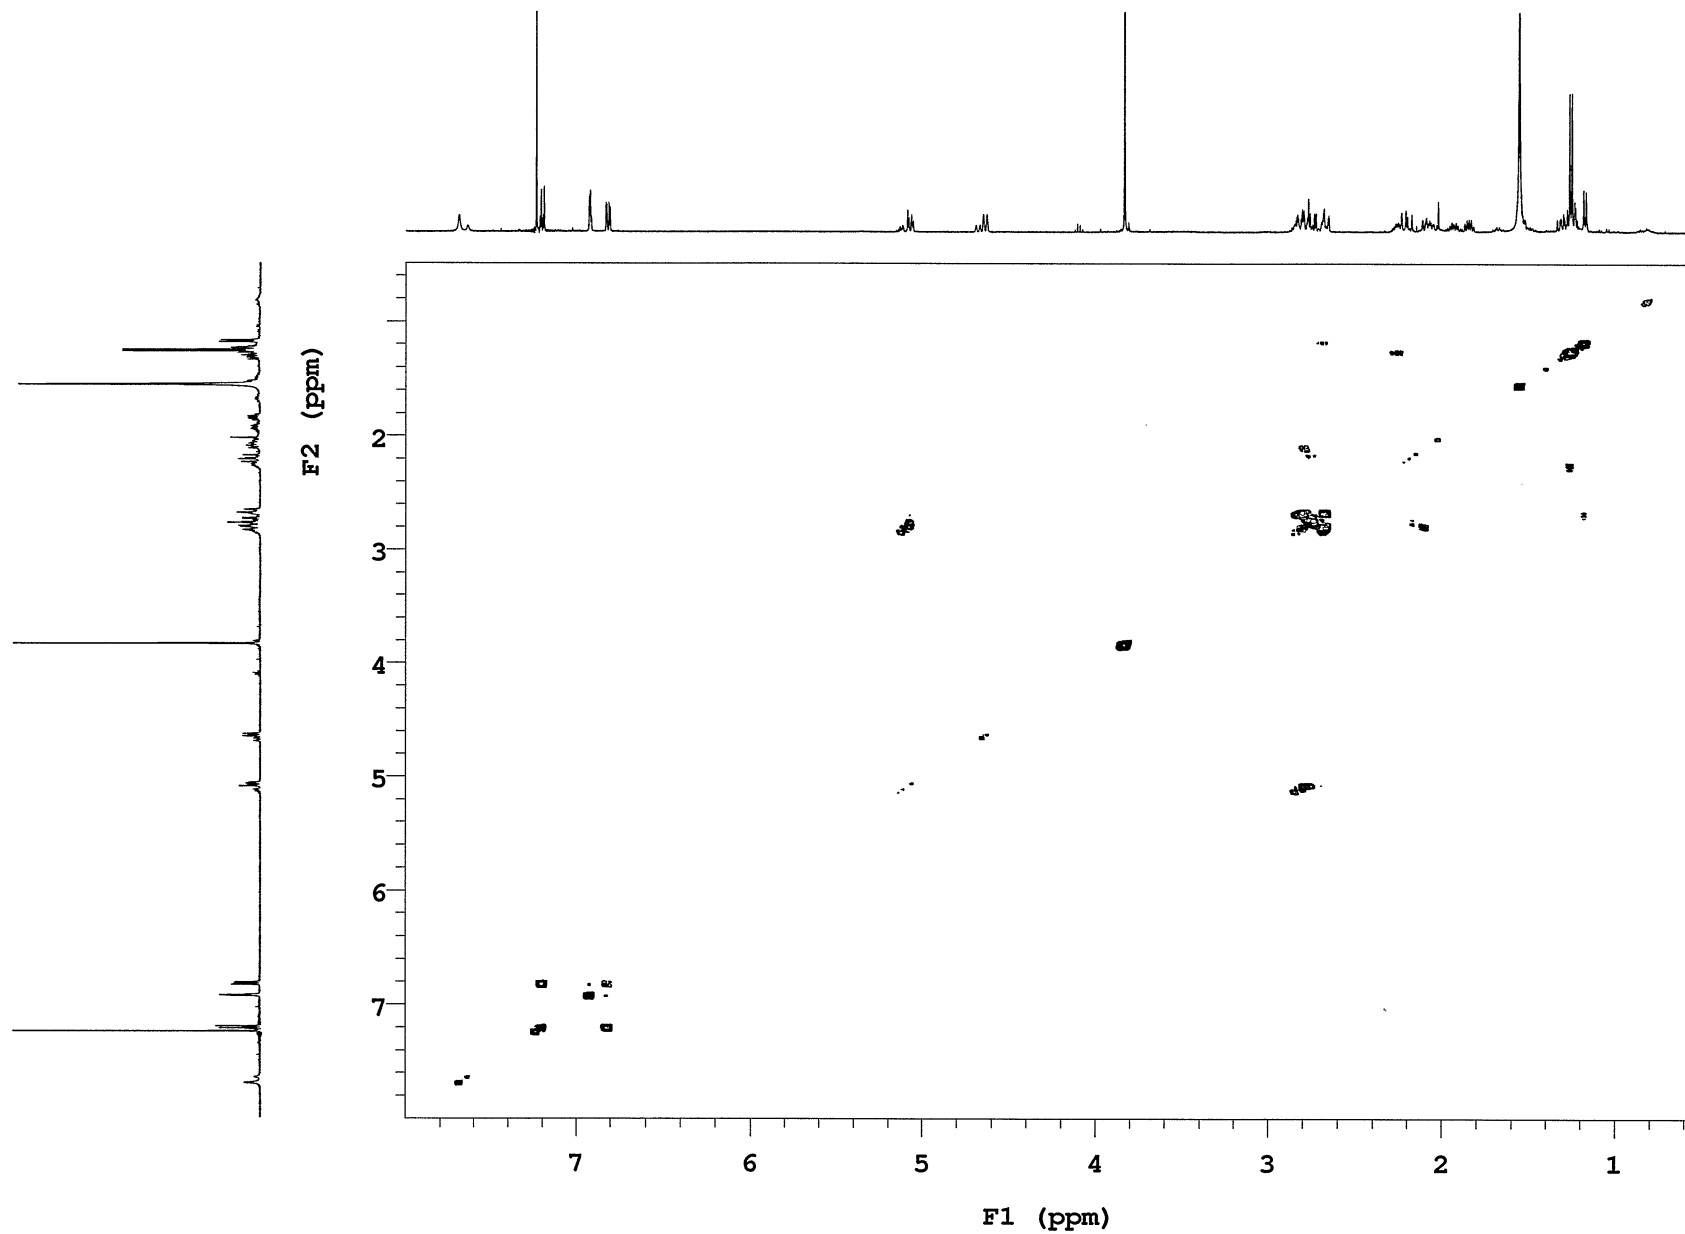COSY of the mixture of **10b** and **11b**

Sample Name RRT-04-067  
Date collected 2022-10-28

Pulse sequence NOESY  
Solvent cdcl3

Temperature 25  
Spectrometer Agilent-NMR-inova500

Study owner vnmr2  
Operator vnmr2

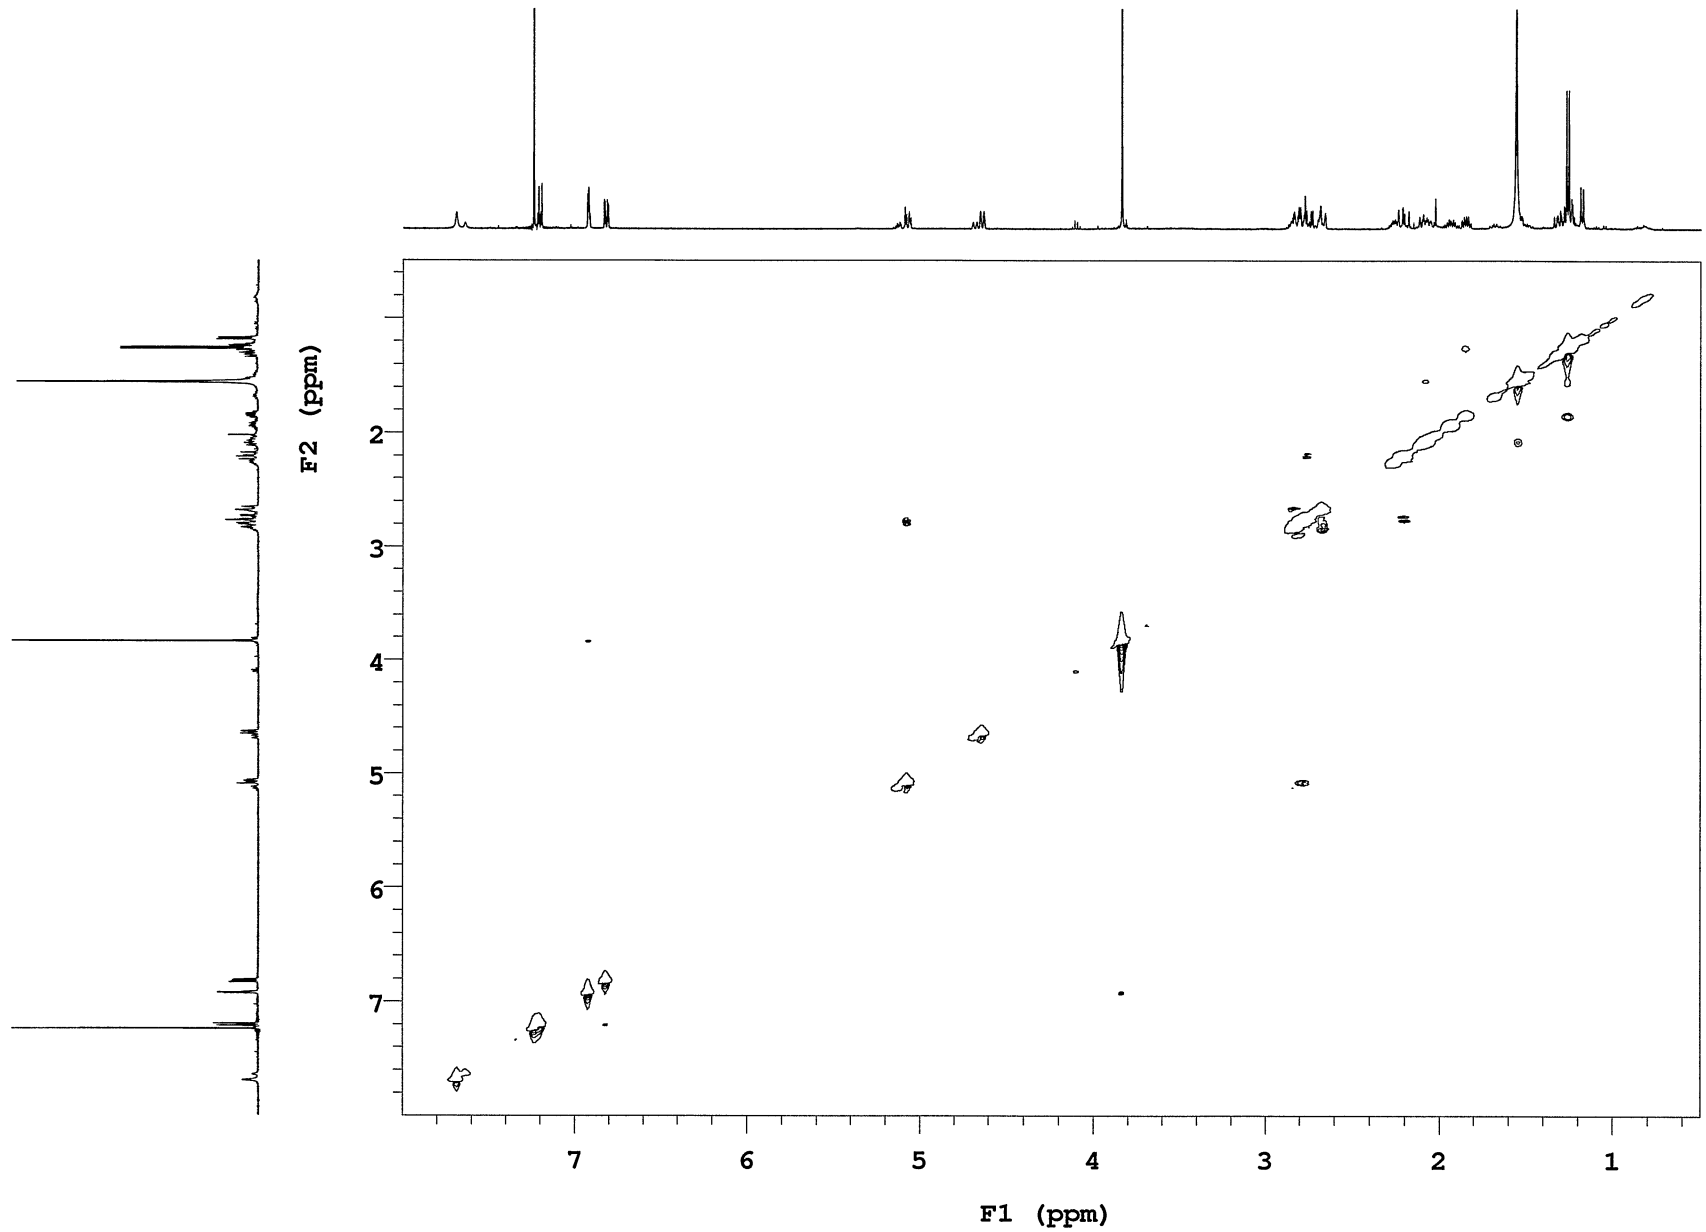NOESY of the mixture of **10b** and **11b**



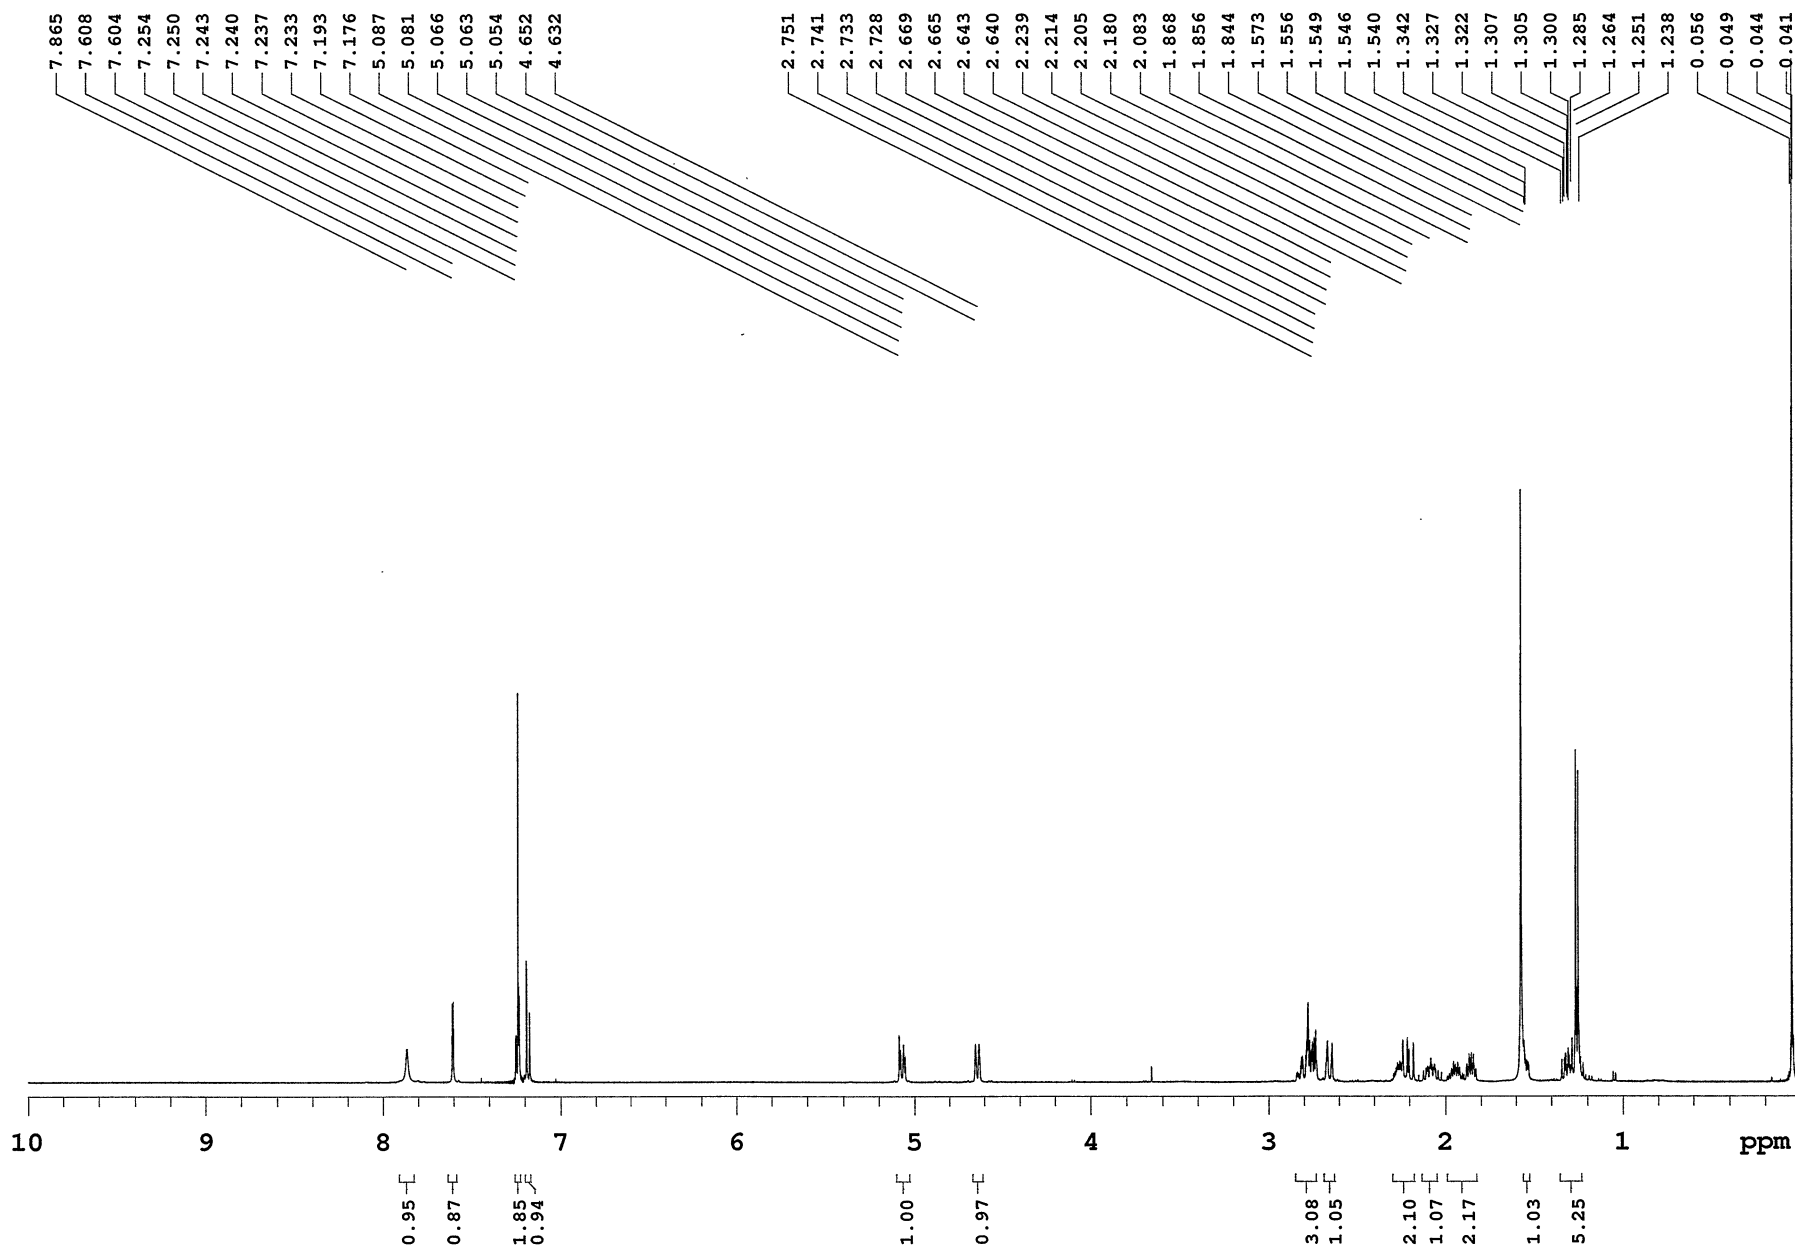

Sample Name RRT-04-075-F-II  
Date collected 2022-11-11Pulse sequence CARBON  
Solvent cdcl3Temperature 25  
Spectrometer Agilent-NMR-inova500Study owner vnmr2  
Operator vnmr2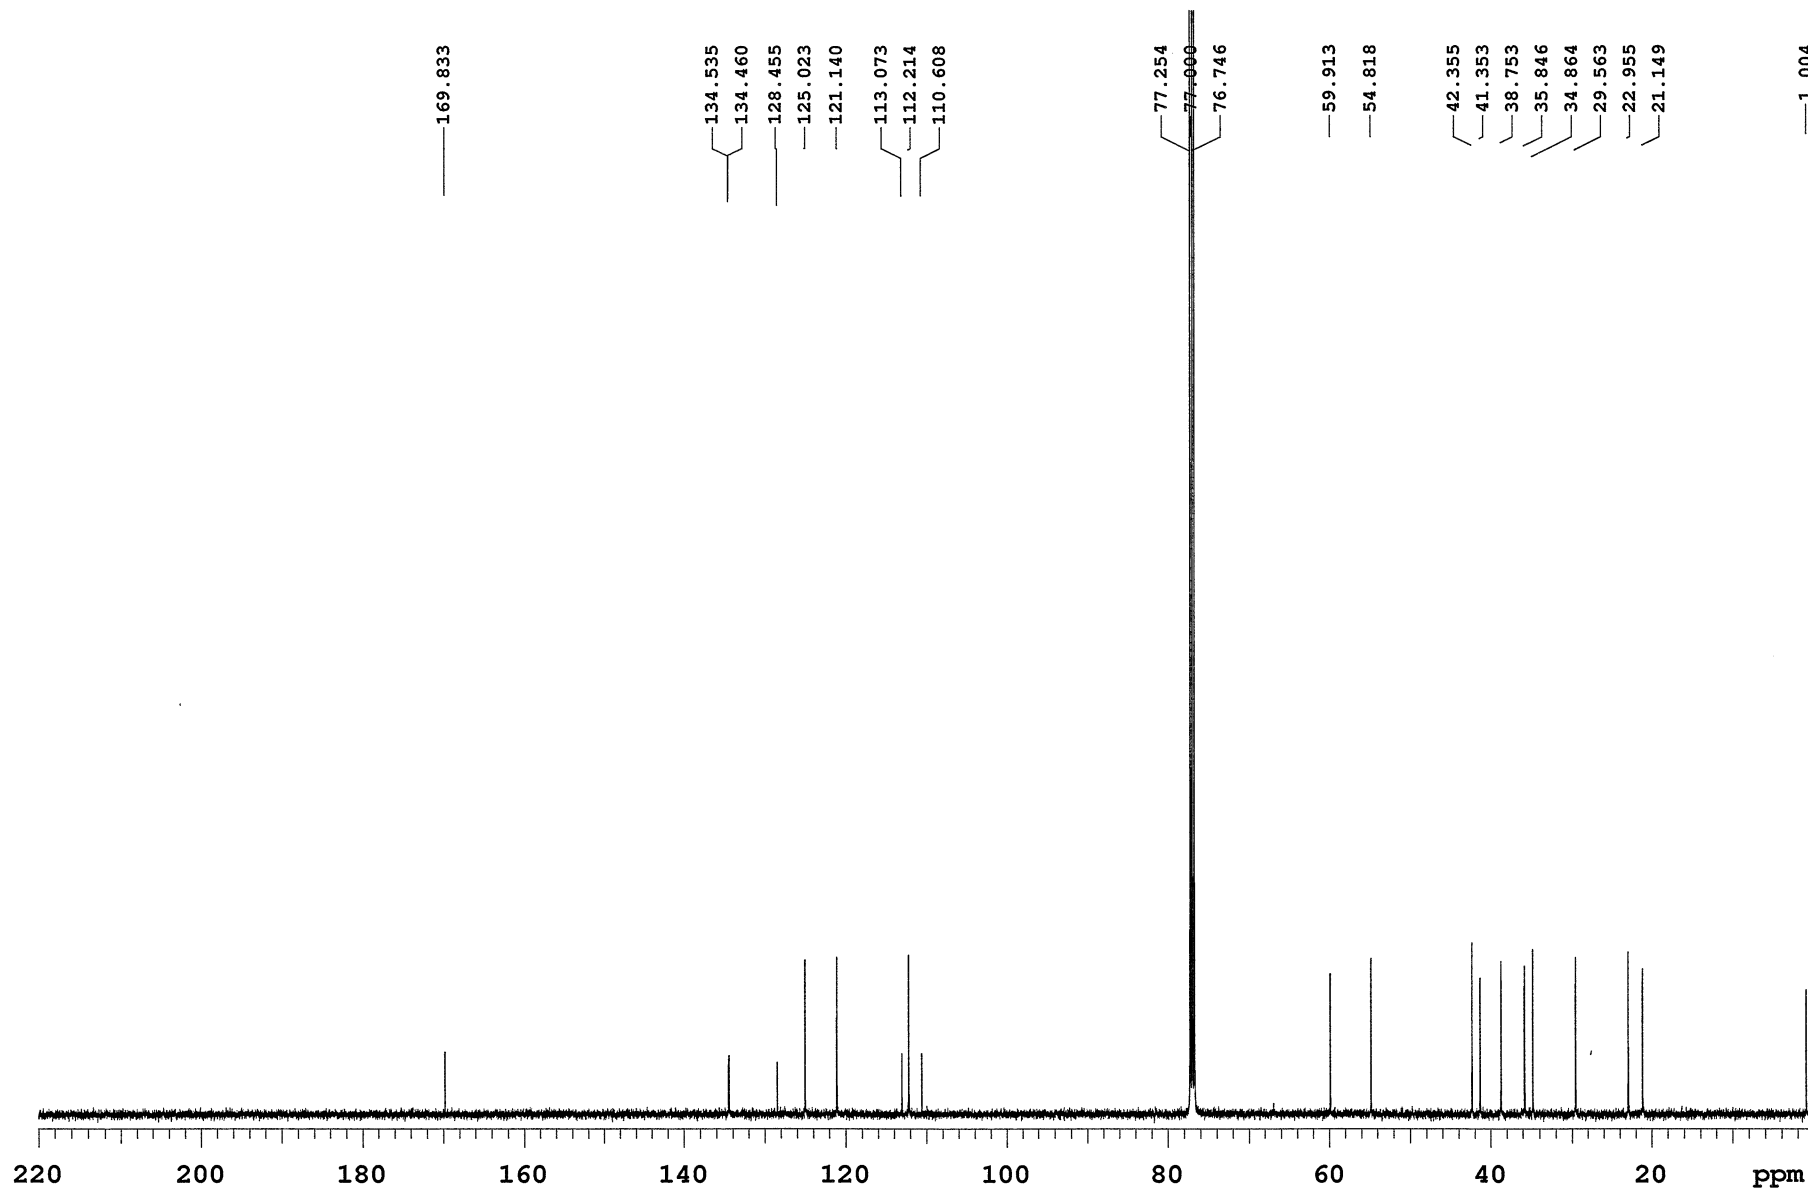13C NMR (125 MHz, CDCl<sub>3</sub>) of compound 10c

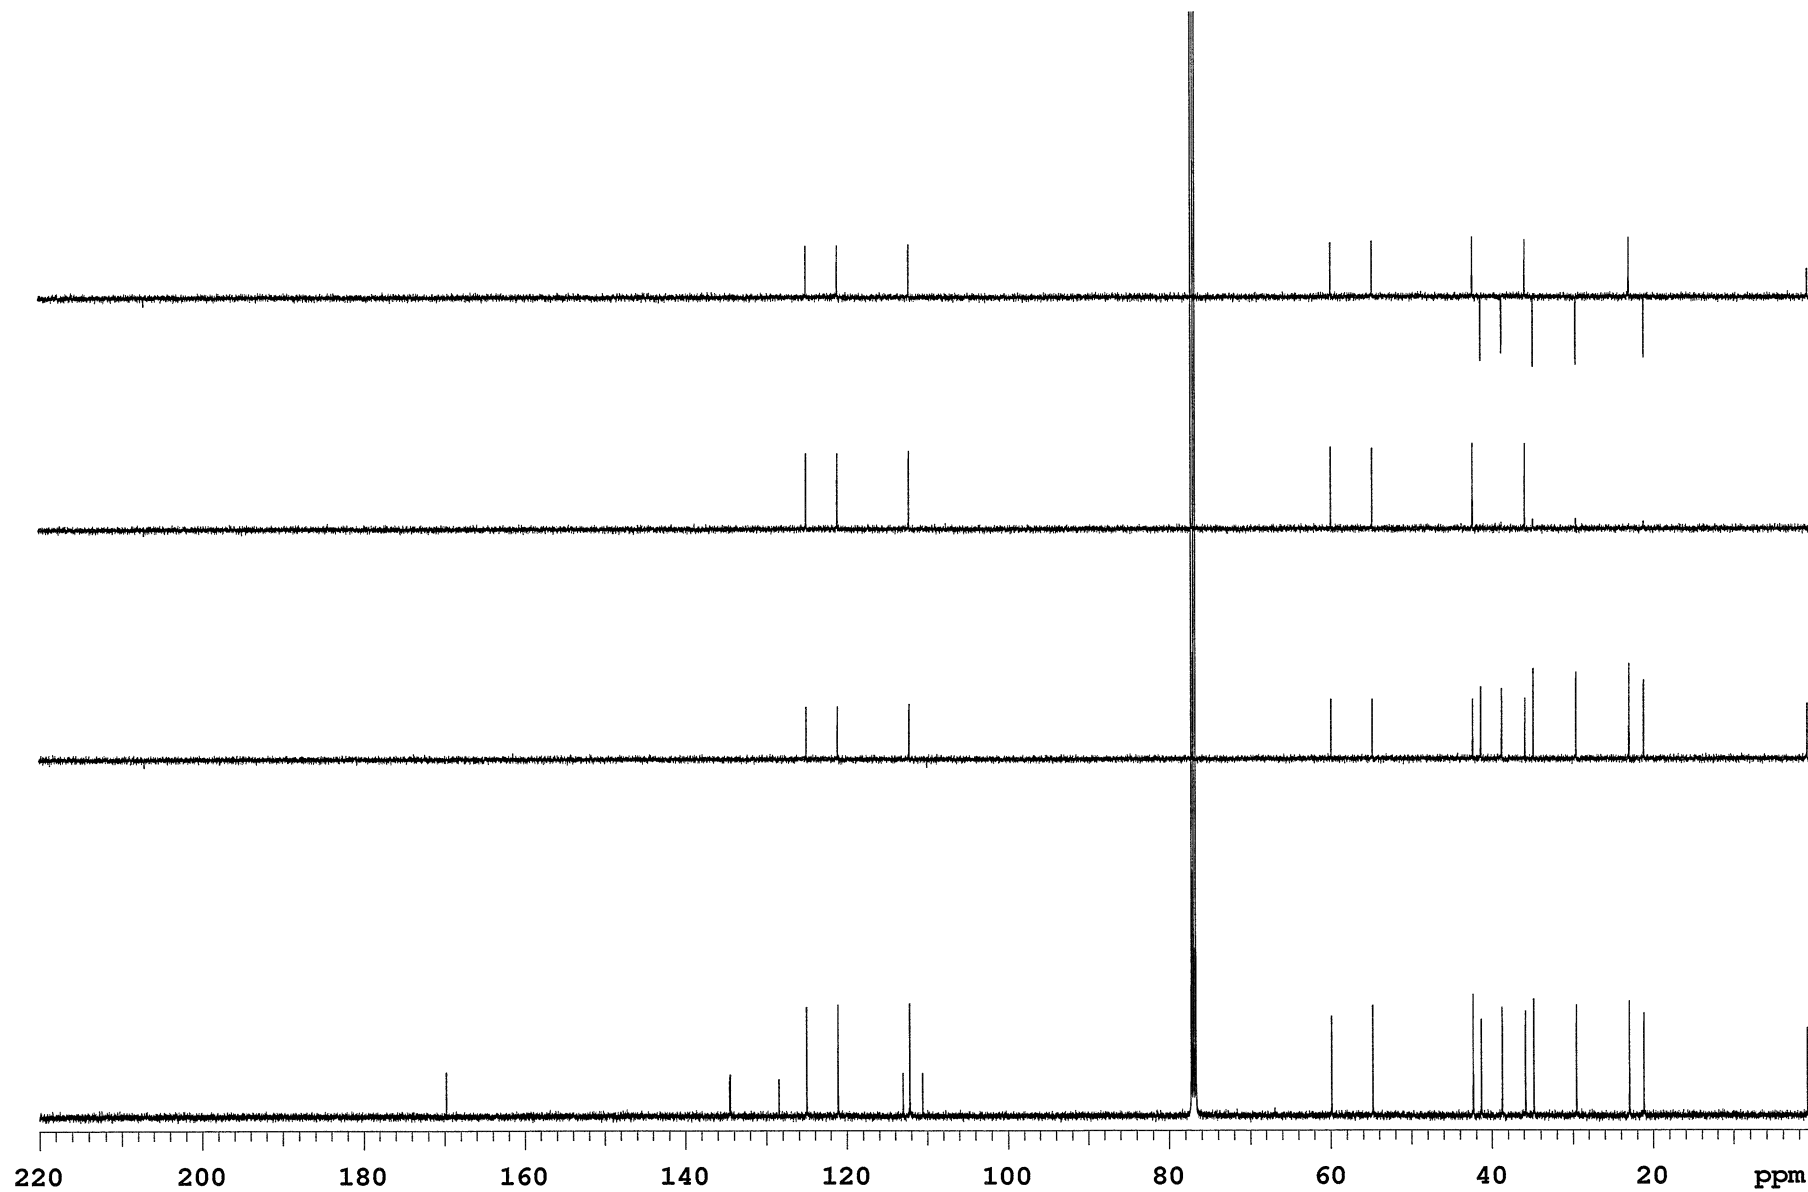

DEPT of compound 10c

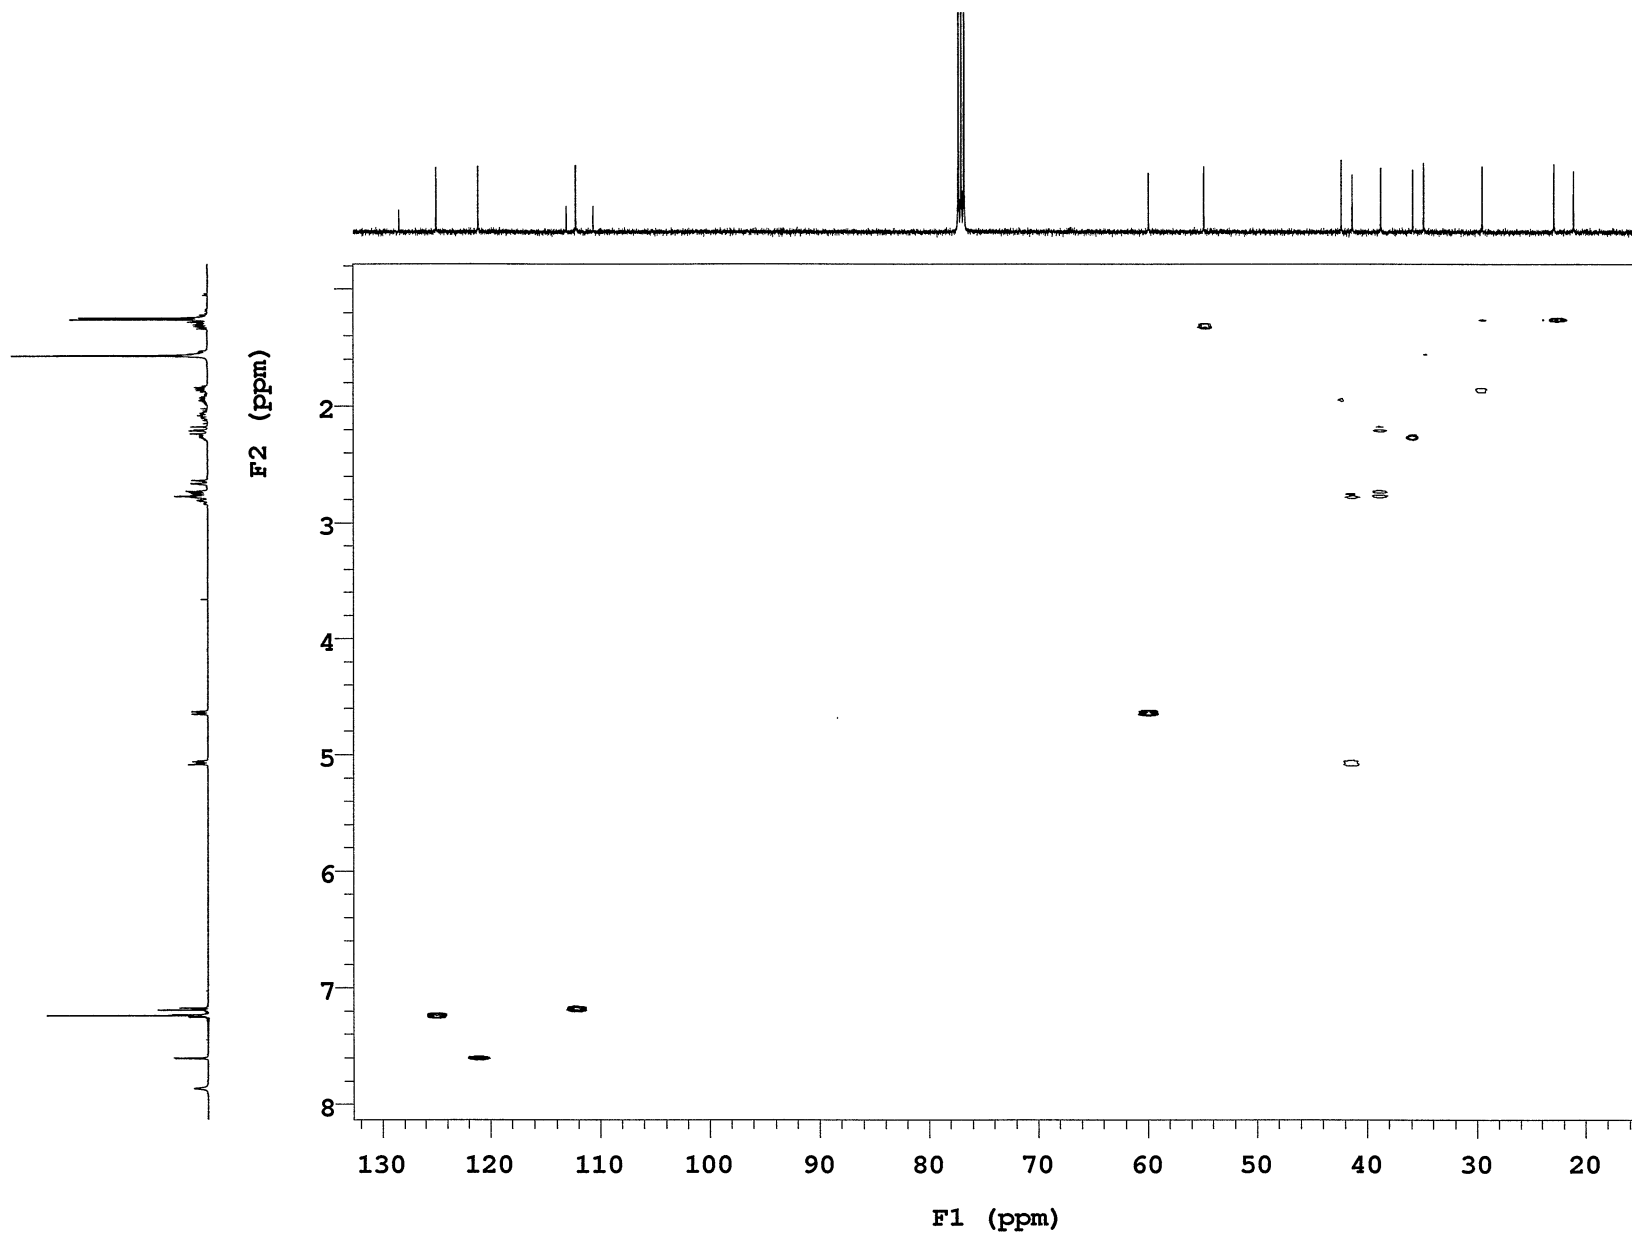

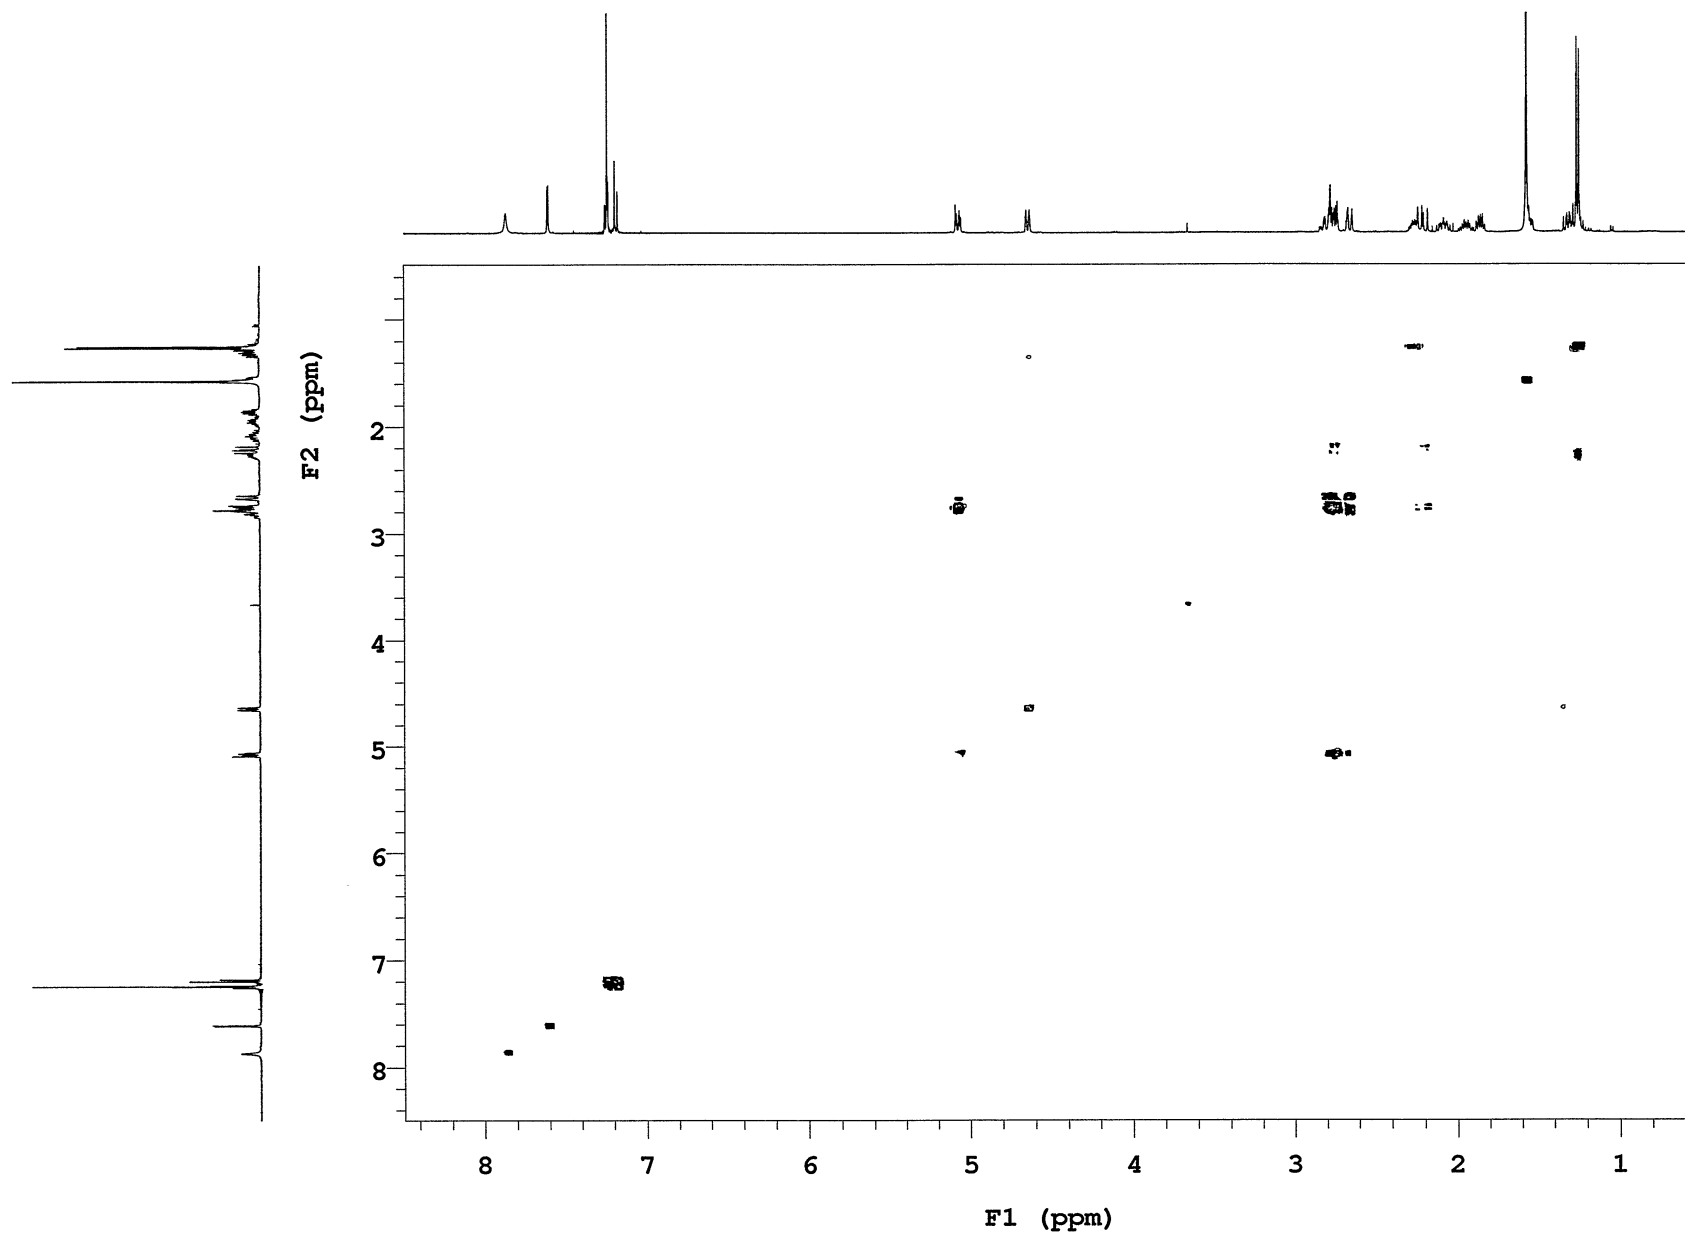

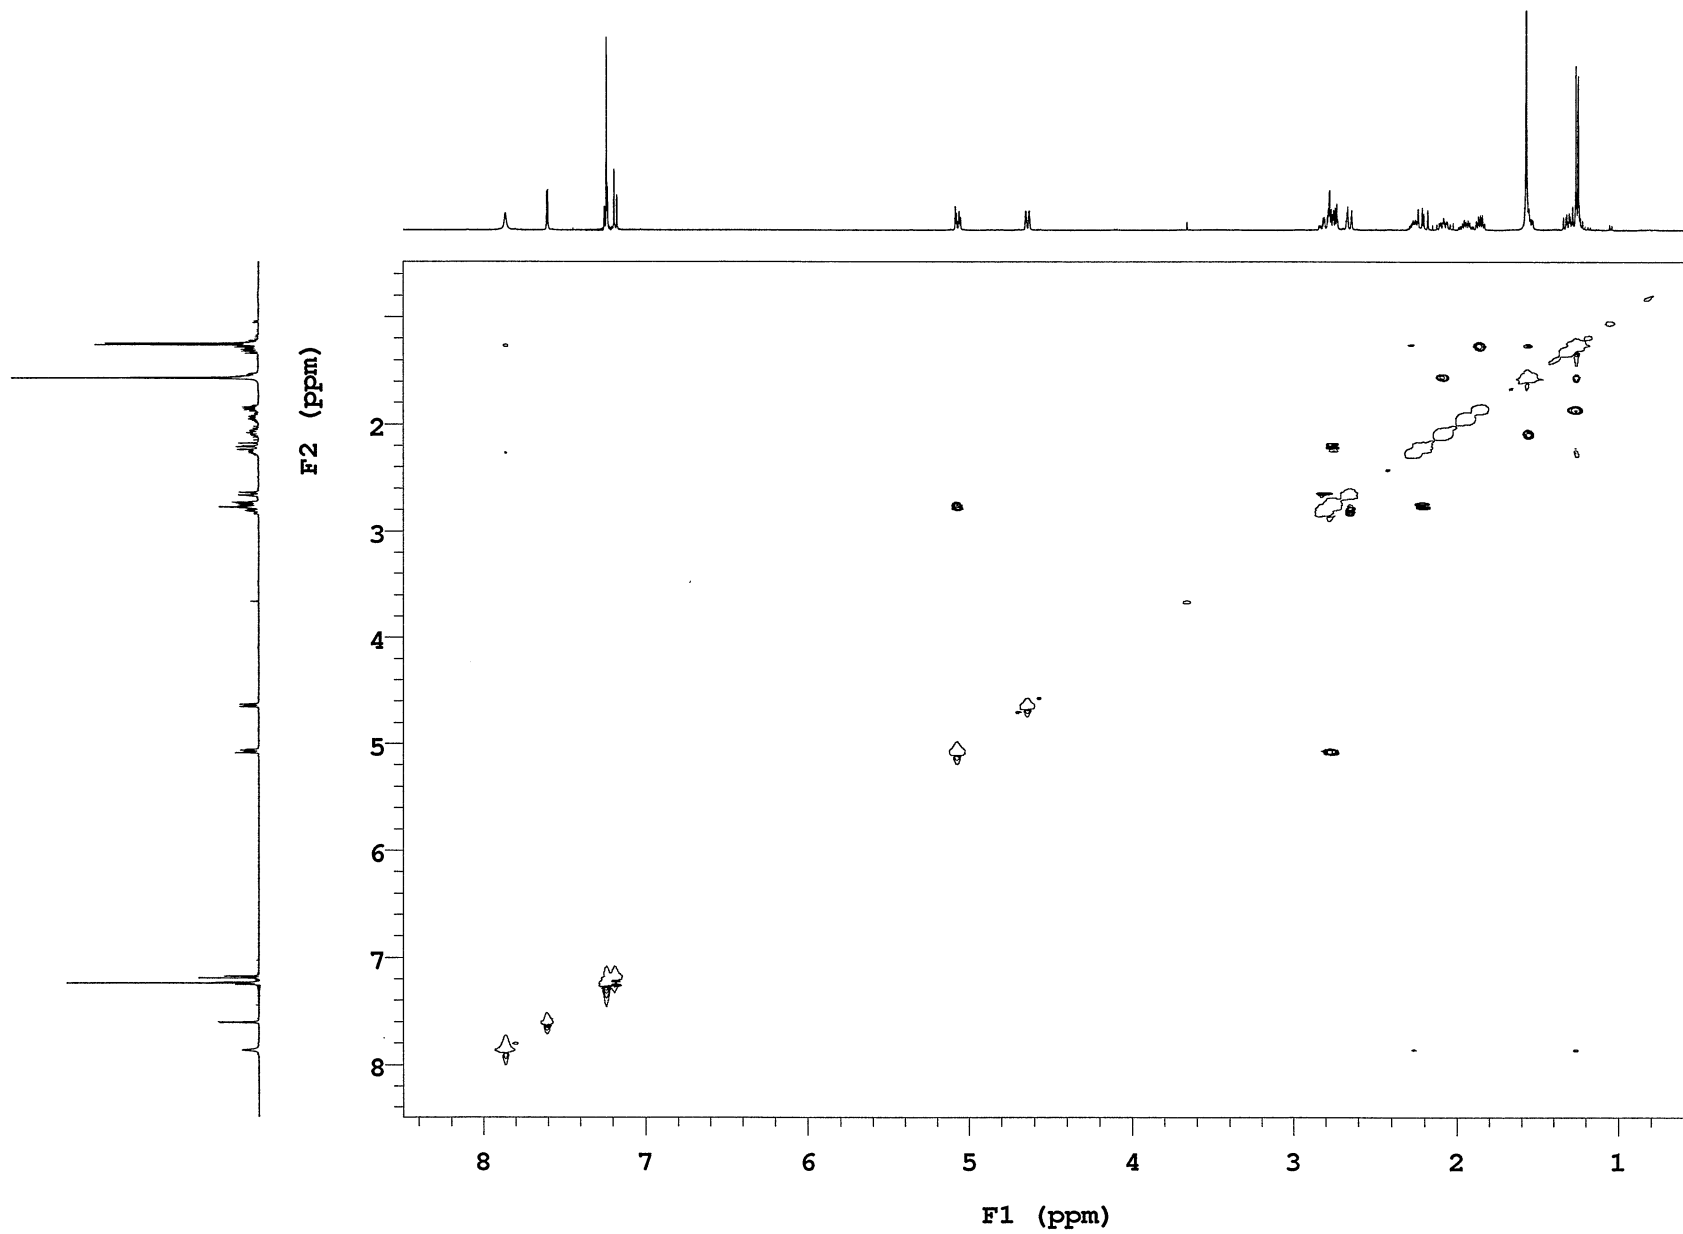

NOESY of compound 10c

Sample Name RRT-04-089-F-I  
Date collected 2023-01-07

Pulse sequence PROTON  
Solvent cdcl3

Temperature 25  
Spectrometer Agilent-NMR-inova500

Study owner vnmr2  
Operator vnmr2

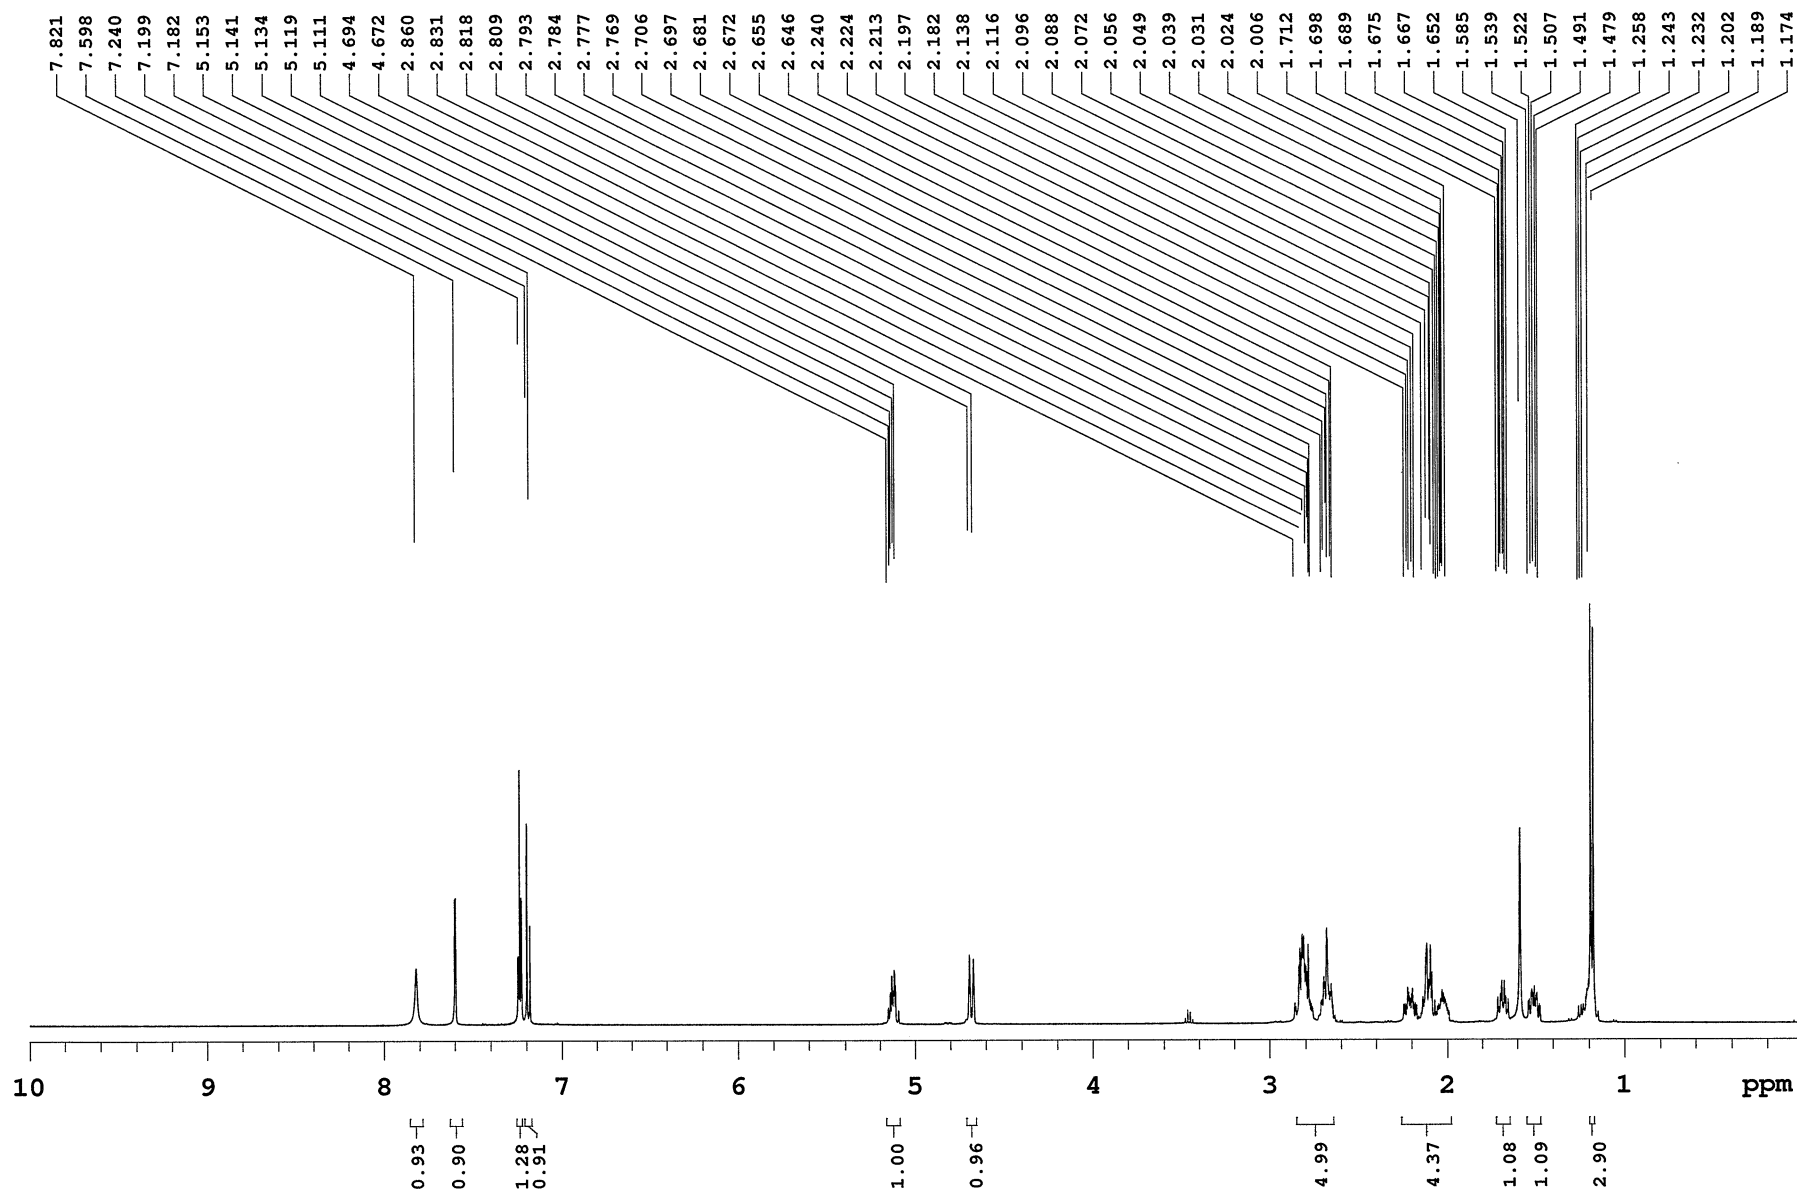

Sample Name RRT-04-089-F-I  
Date collected 2023-01-07

Pulse sequence CARBON  
Solvent cdcl3

Temperature 25  
Spectrometer Agilent-NMR-inova500

Study owner vnmr2  
Operator vnmr2

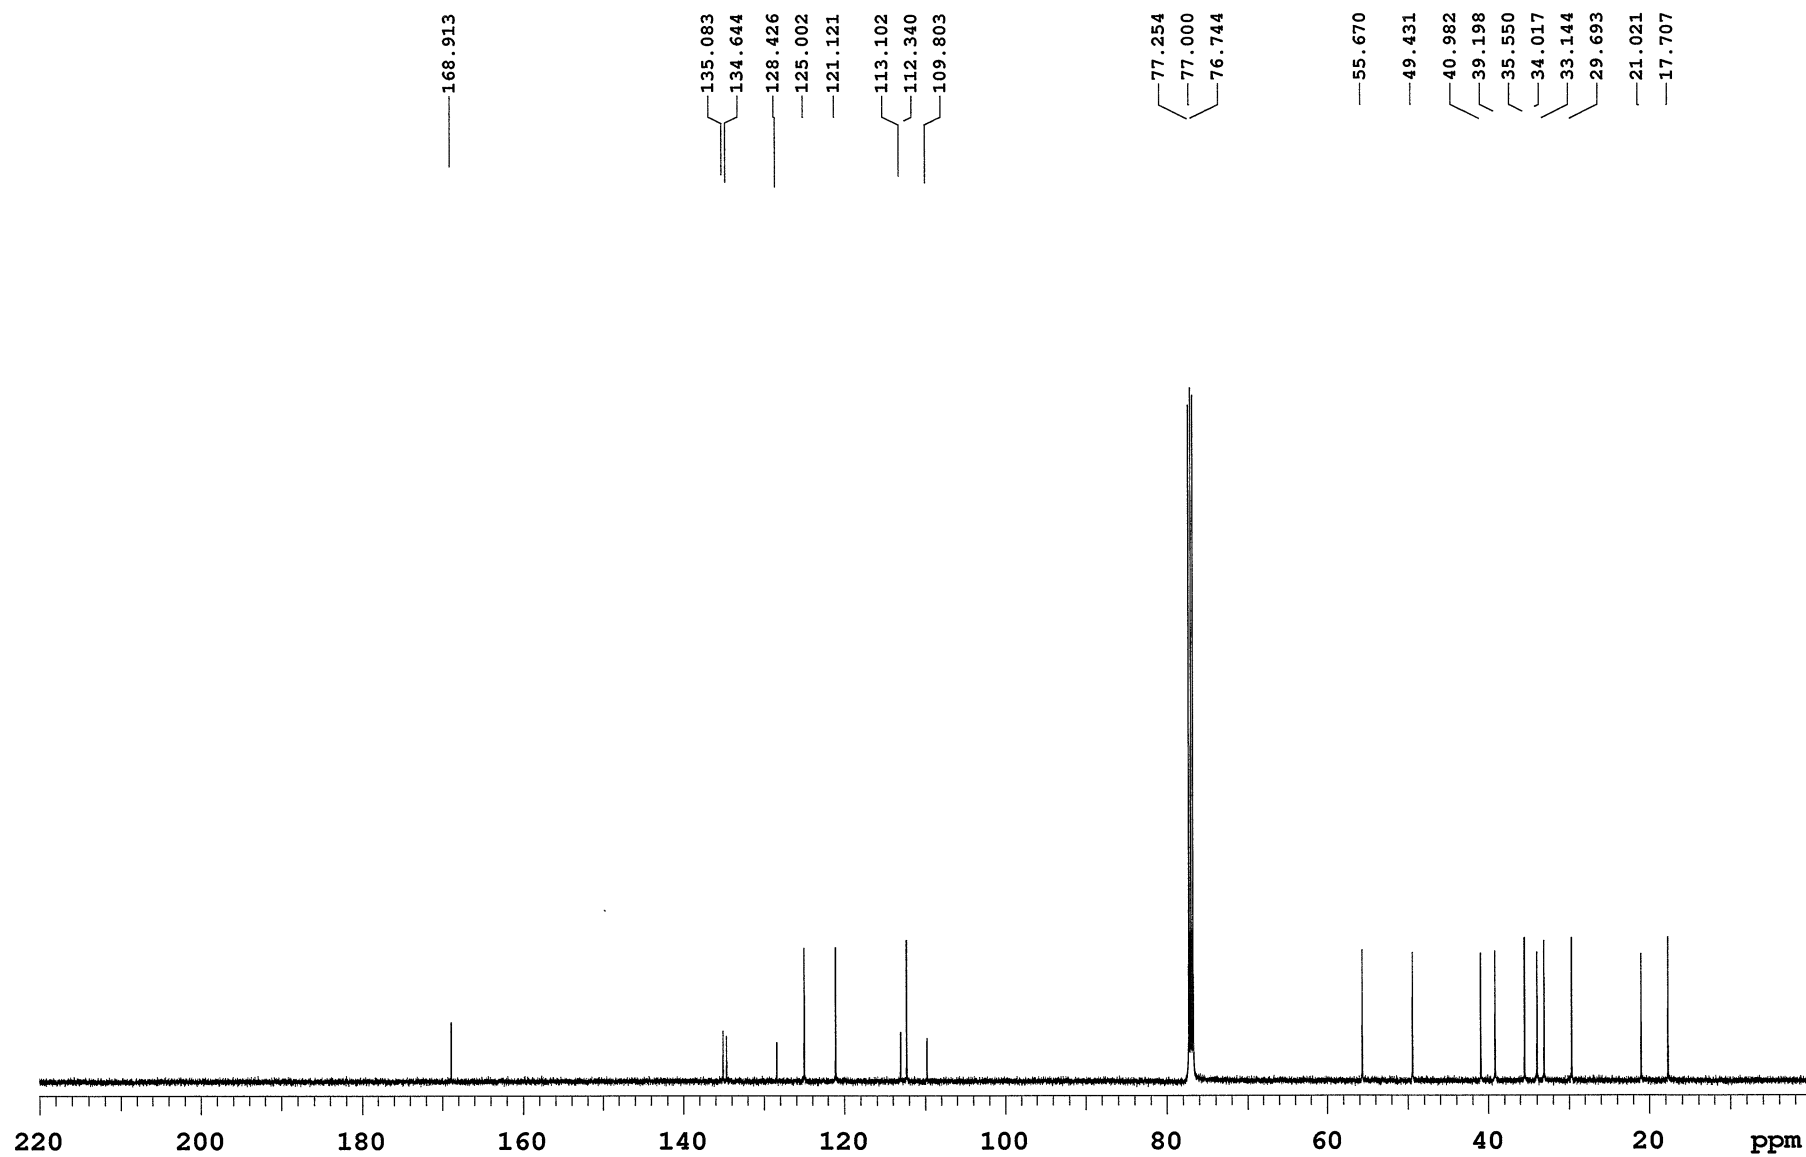

13C NMR (125 MHz, CDCl<sub>3</sub>) of compound 11c



Sample Name **RRT-04-089-F-I**  
Date collected **2023-01-07**

Pulse sequence **DEPT**  
Solvent **cdcl3**

Temperature **25**  
Spectrometer **Agilent-NMR-inova500**

Study owner **vnmr2**  
Operator **vnmr2**

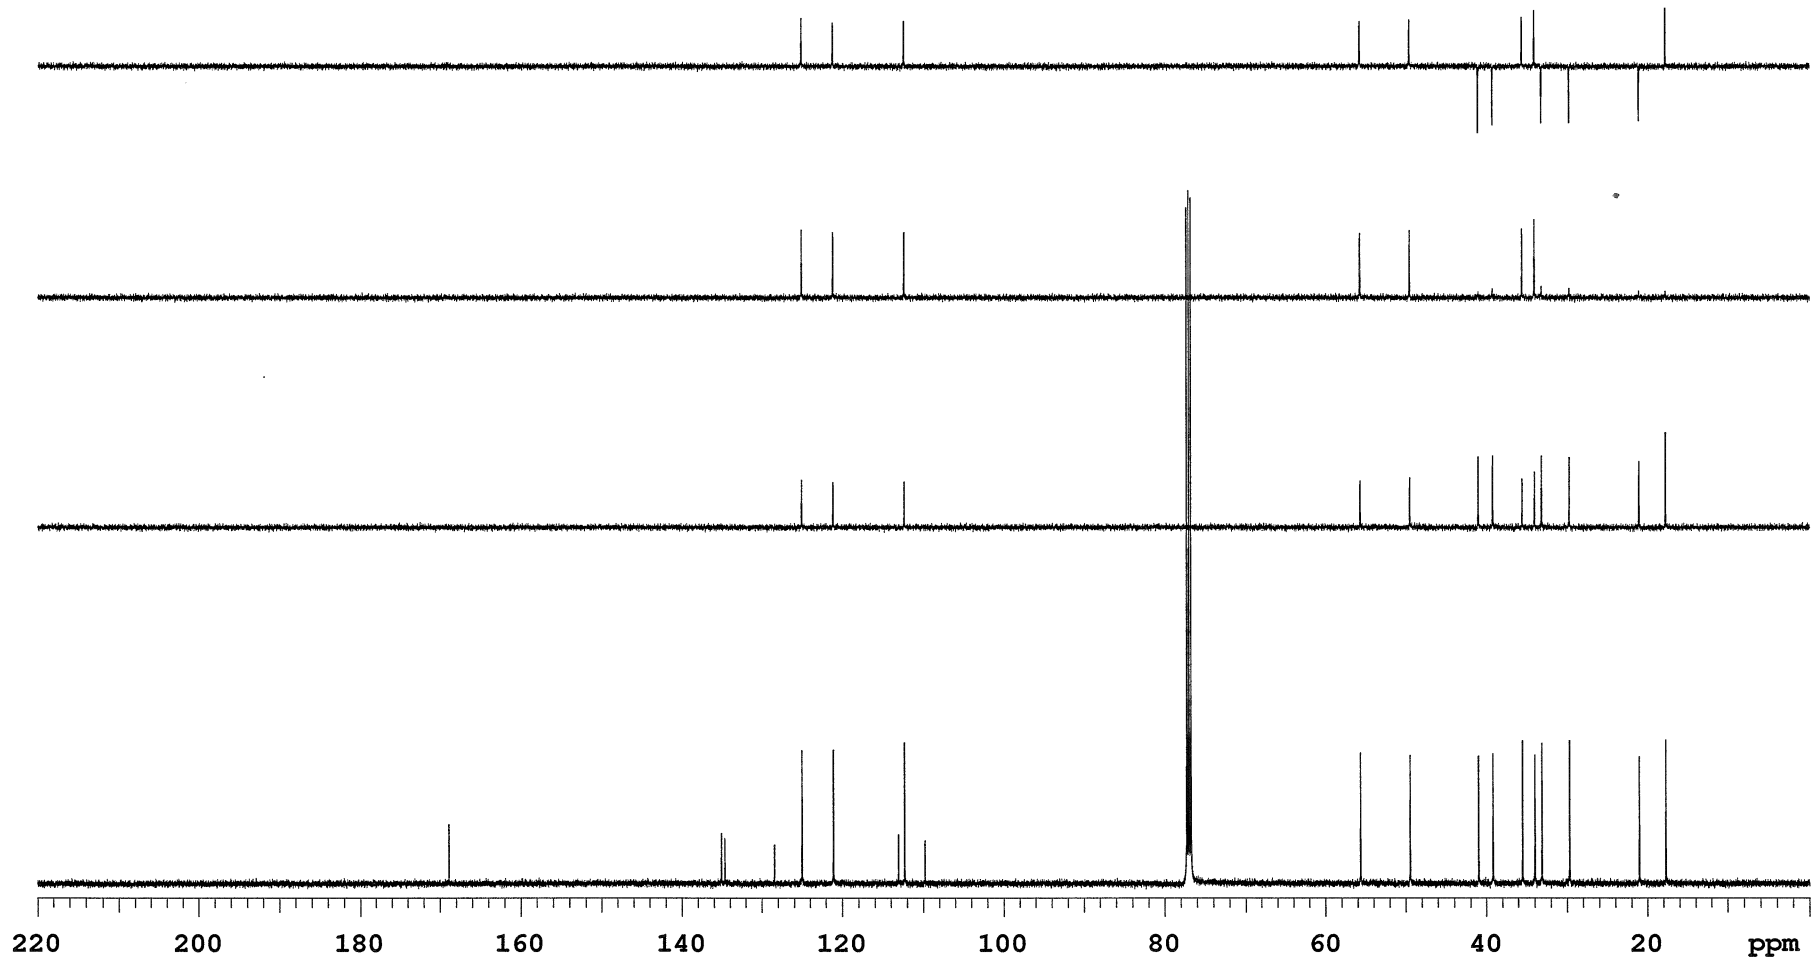

DEPT of compound 11c

Sample Name RRT-04-089-F-I  
Date collected 2023-01-08

Pulse sequence gHSQC  
Solvent cdcl3

Temperature 25  
Spectrometer Agilent-NMR-inova500

Study owner vnmr2  
Operator vnmr2

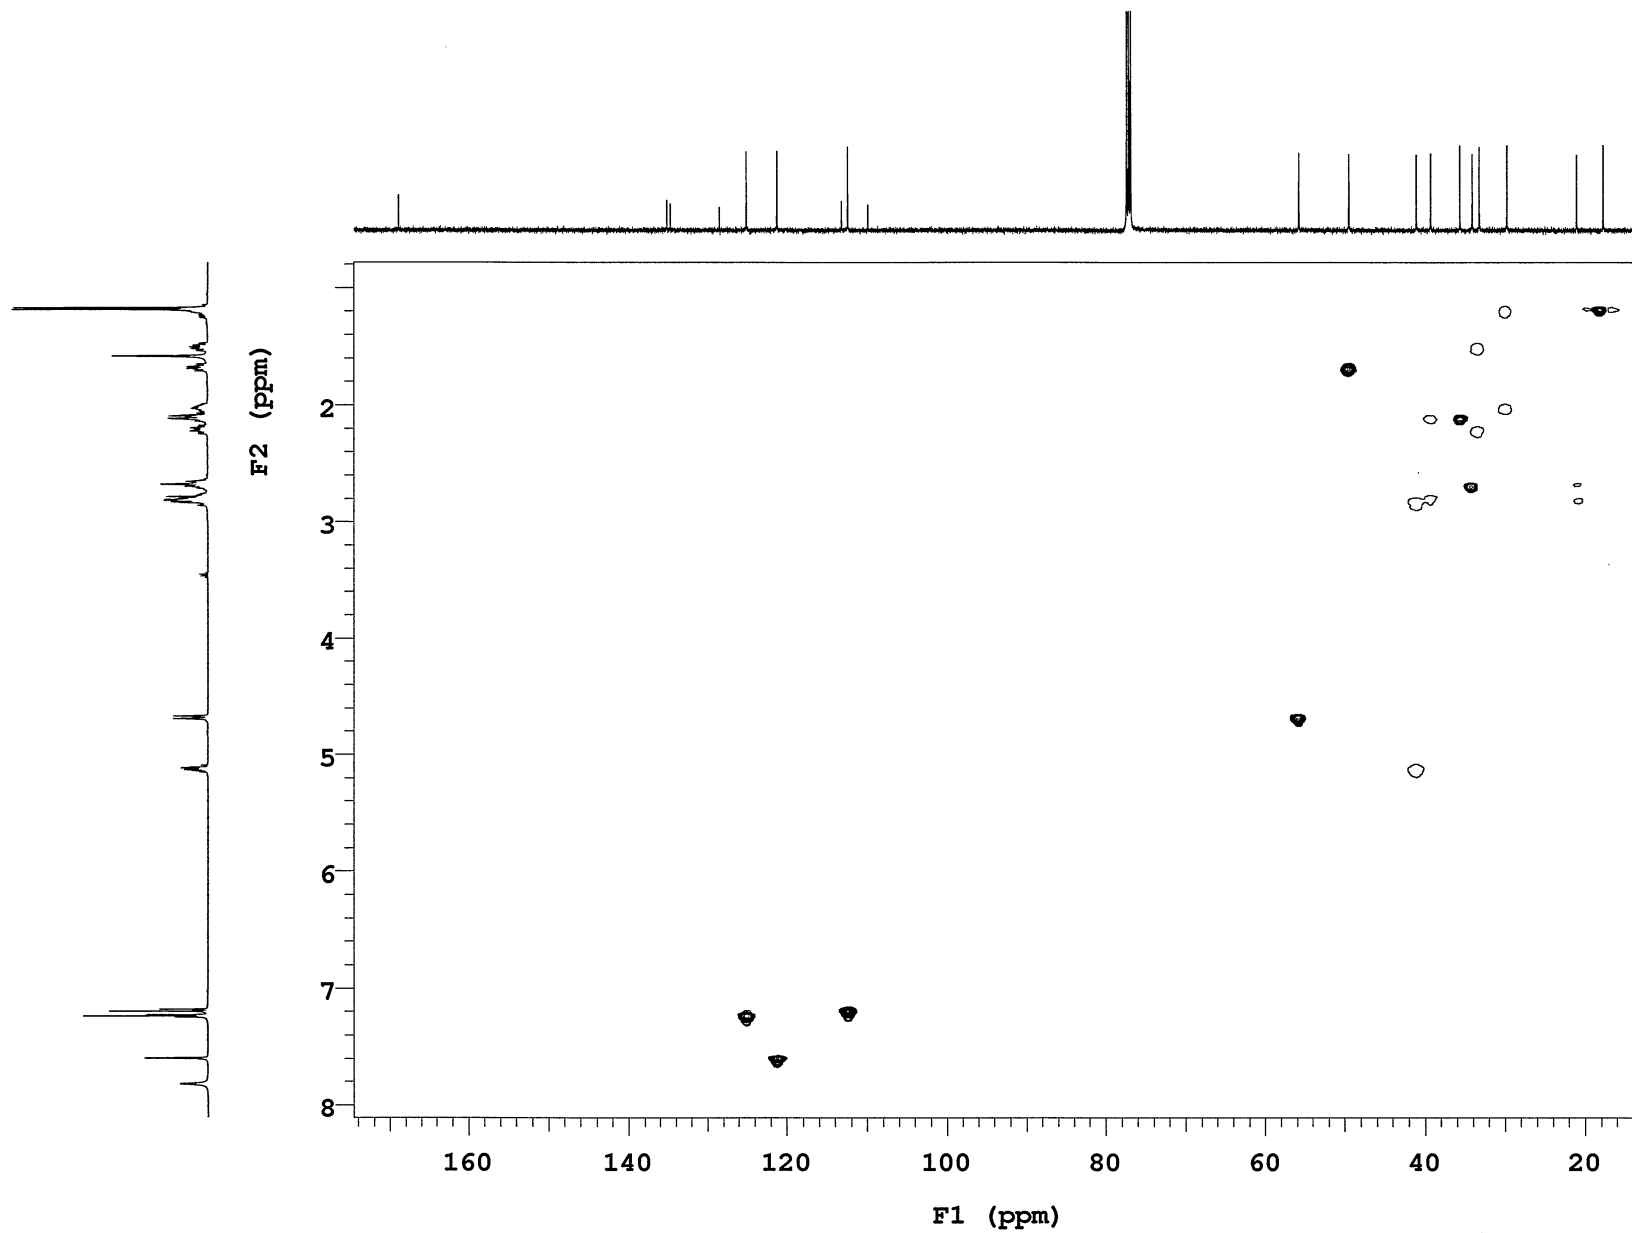

Sample Name RRT-04-089-F-I  
Date collected 2023-01-08

Pulse sequence gCOSY  
Solvent cdcl3

Temperature 25  
Spectrometer Agilent-NMR-inova500

Study owner vnmr2  
Operator vnmr2

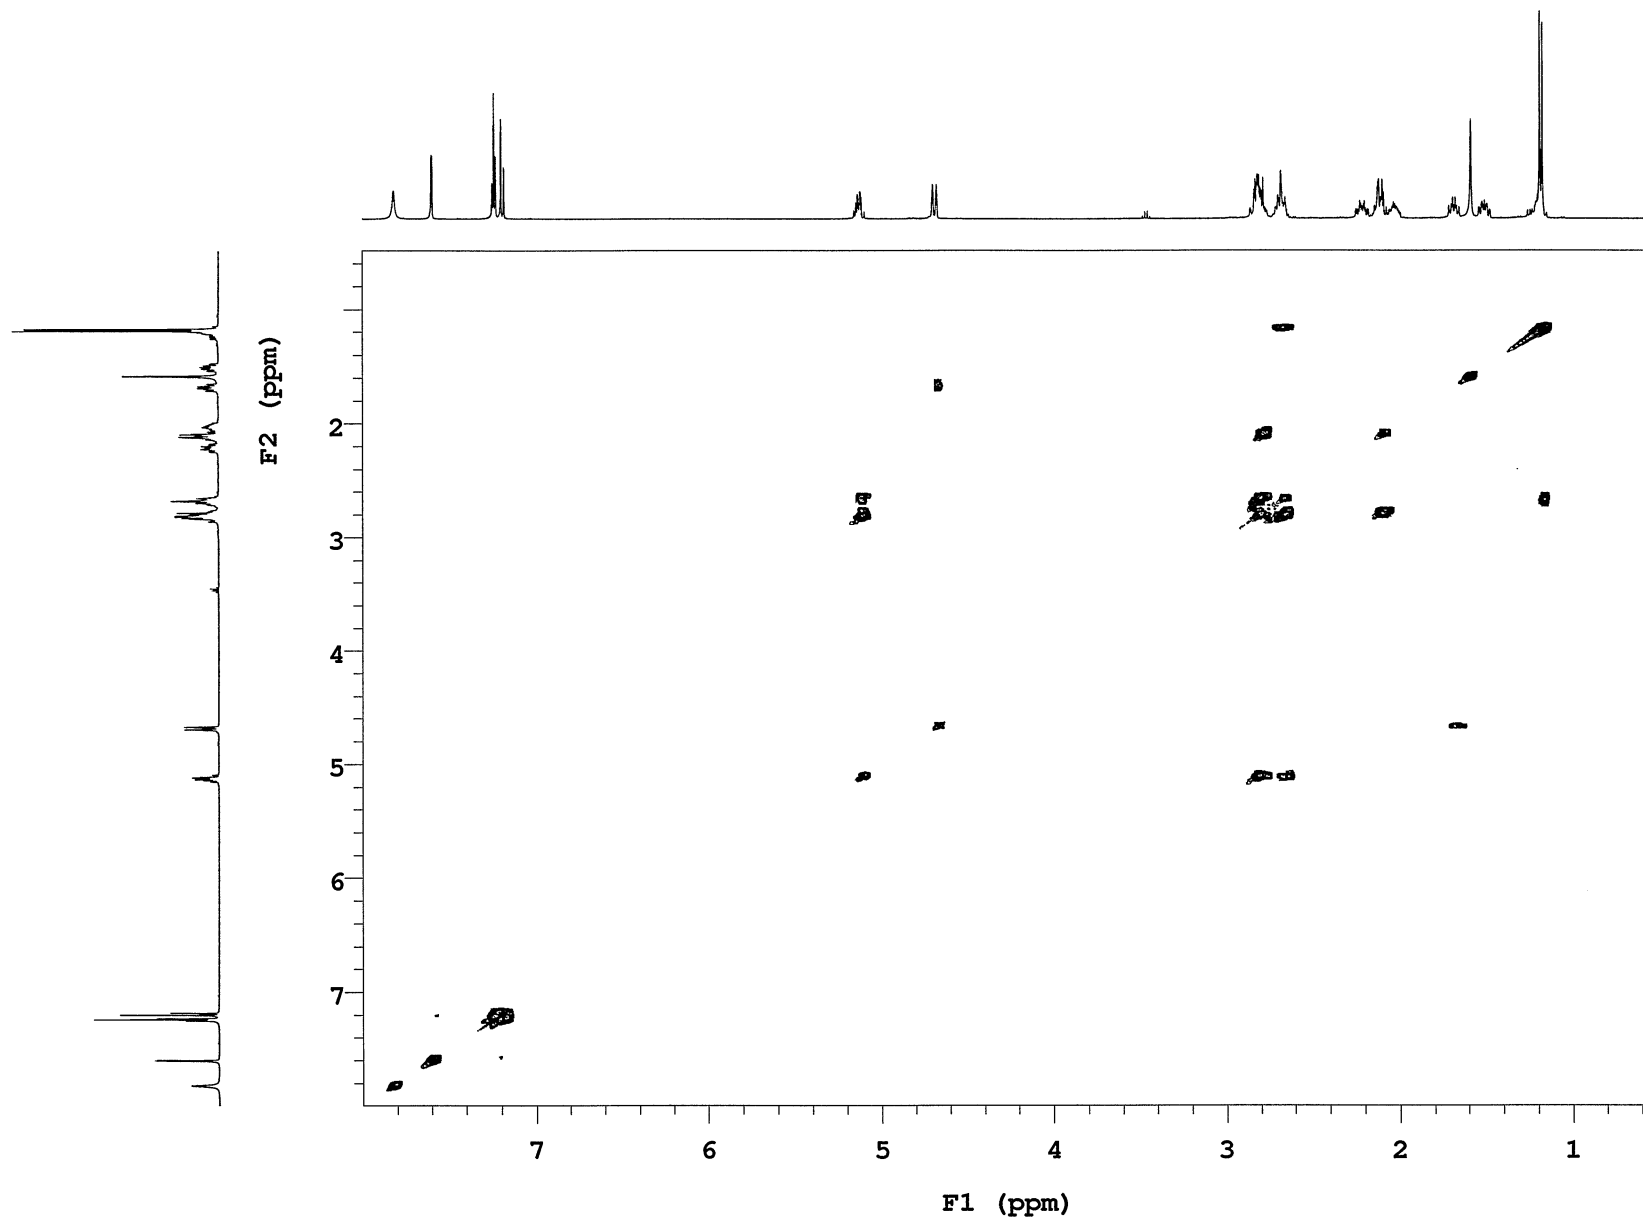

COSY of compound 11c

Sample Name RRT-04-089-F-I  
Date collected 2023-01-08

Pulse sequence NOESY  
Solvent cdcl3

Temperature 25  
Spectrometer Agilent-NMR-inova500

Study owner vnmr2  
Operator vnmr2

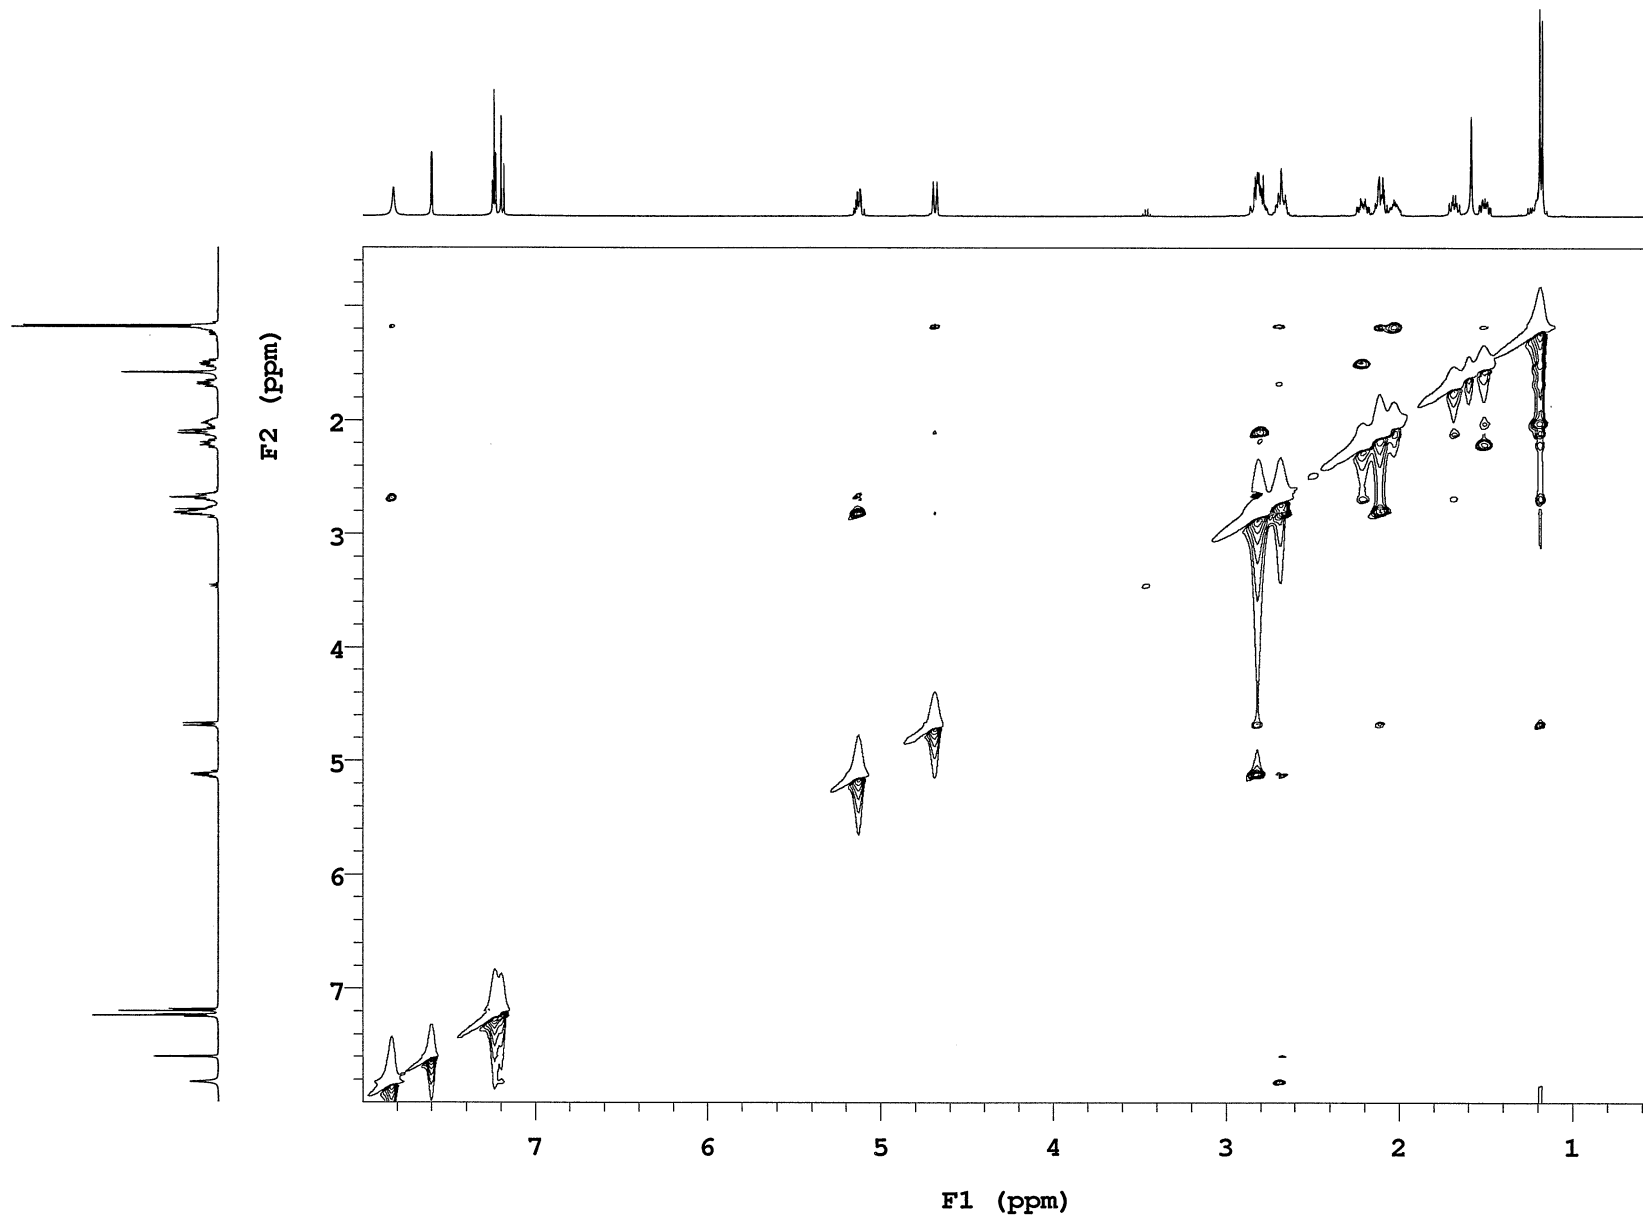

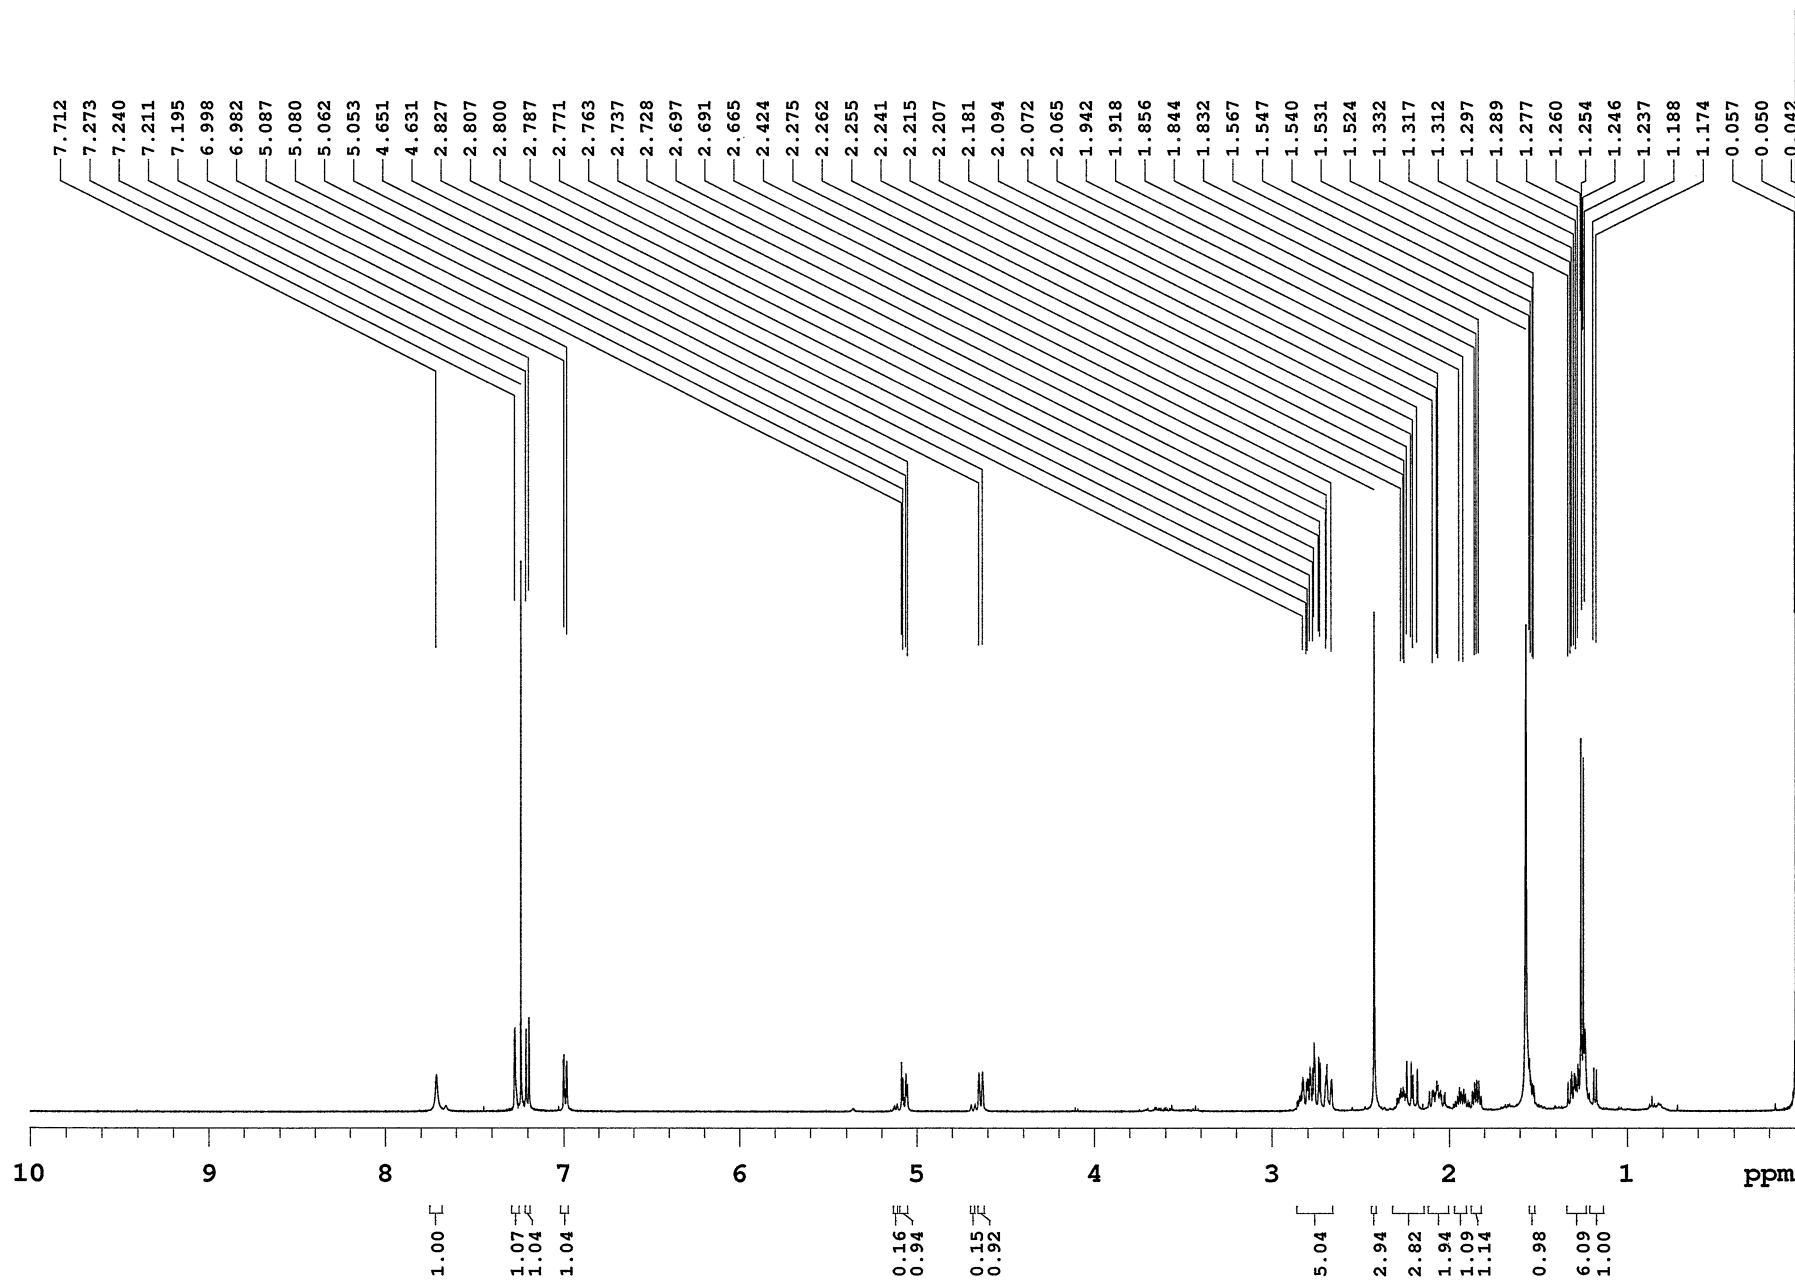

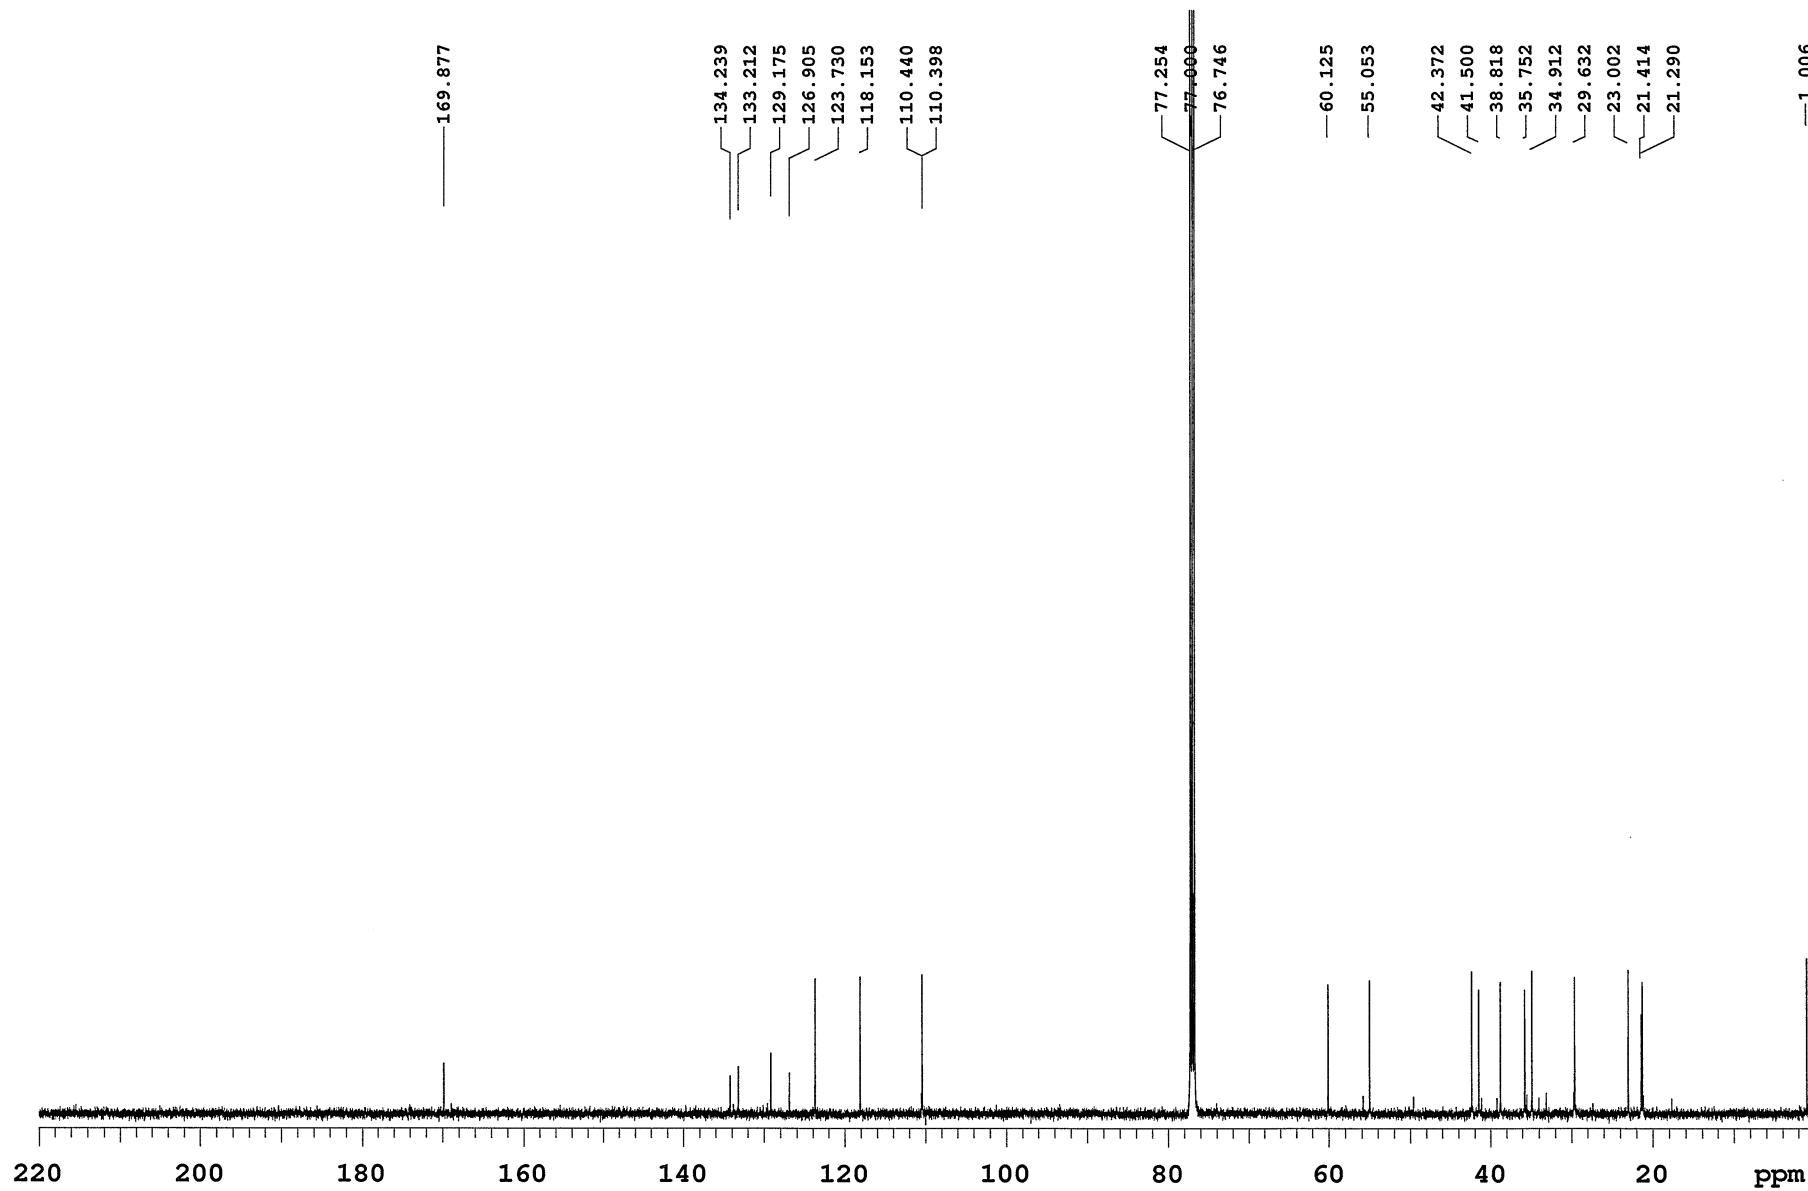

13C NMR (125 MHz, CDCl3) of compound 10d

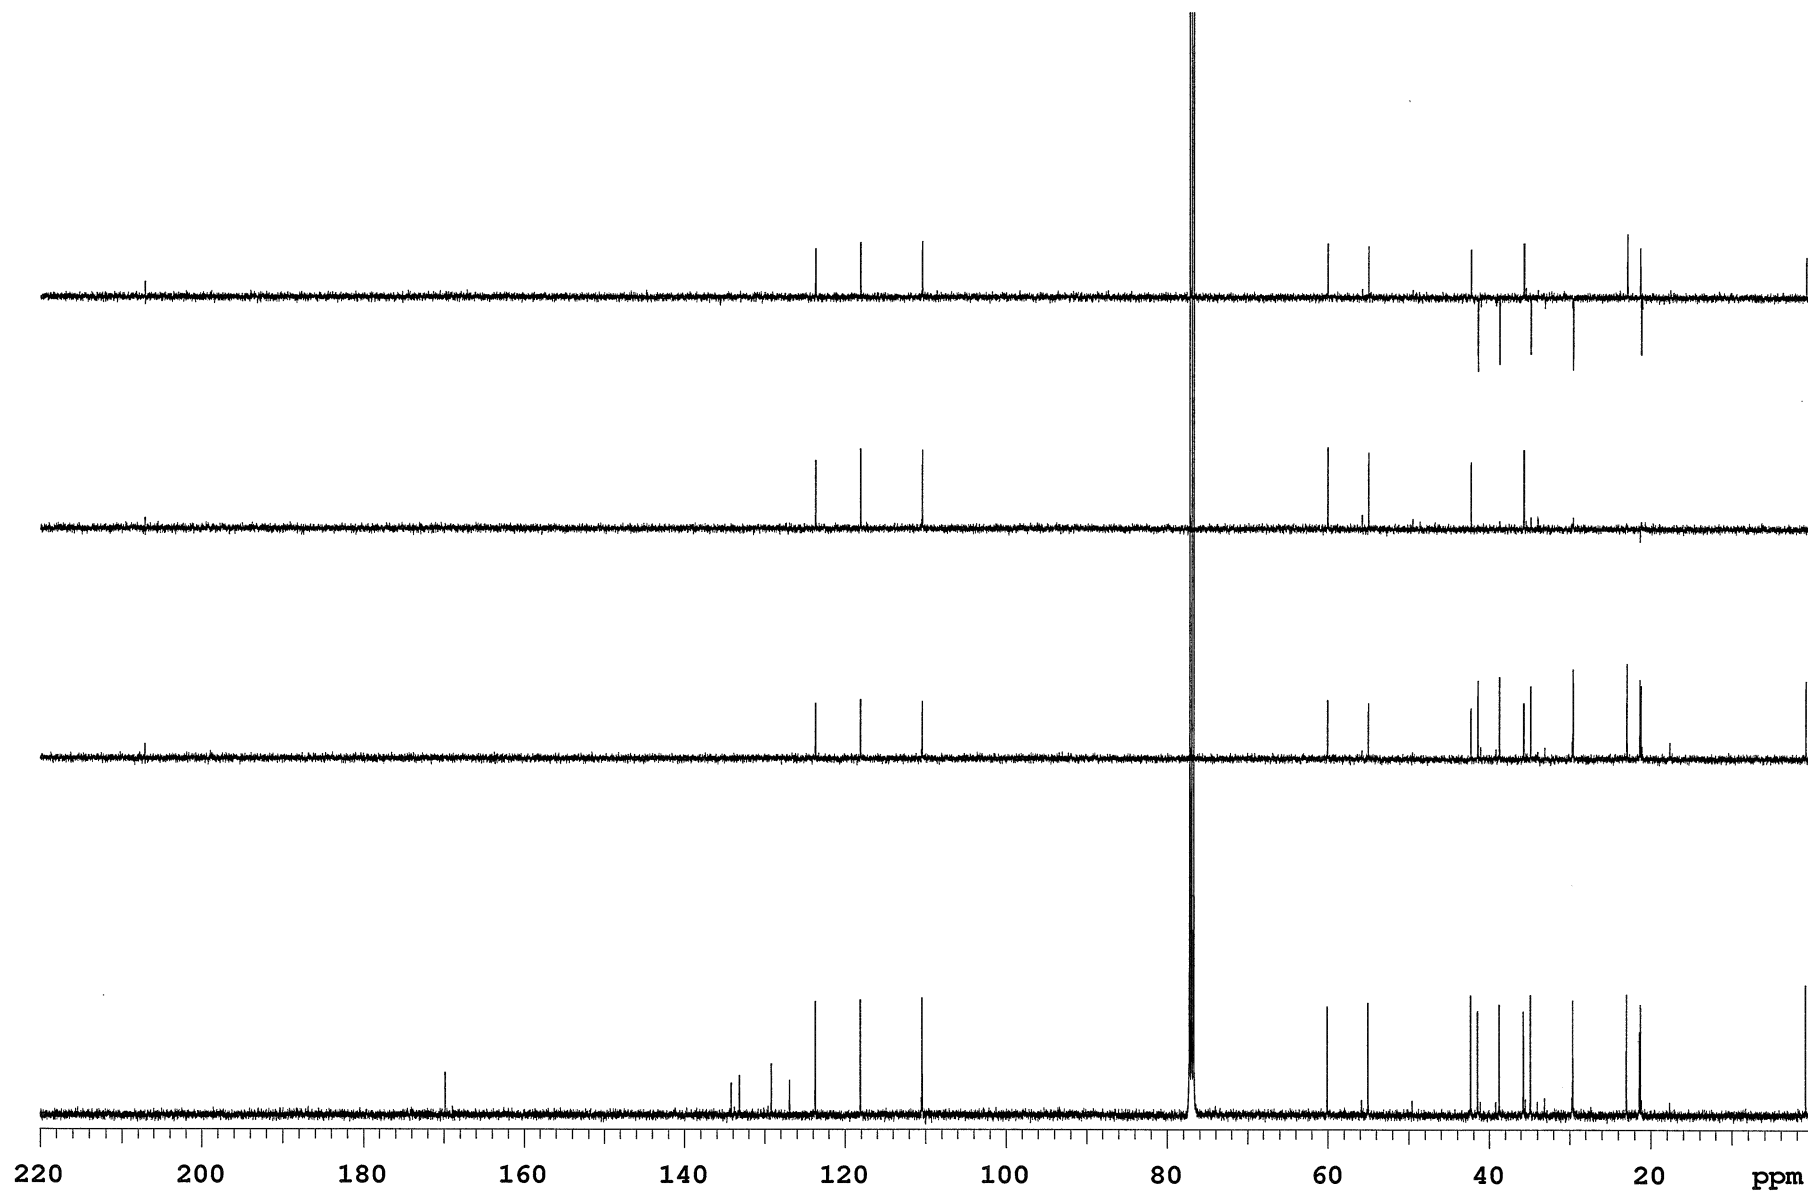

DEPT of compound 10d

Sample Name **RRT-04-069**  
Date collected **2022-10-29**

Pulse sequence **gHSQC**  
Solvent **cdcl3**

Temperature **25**  
Spectrometer **Agilent-NMR-inova500**

Study owner **vnmr2**  
Operator **vnmr2**

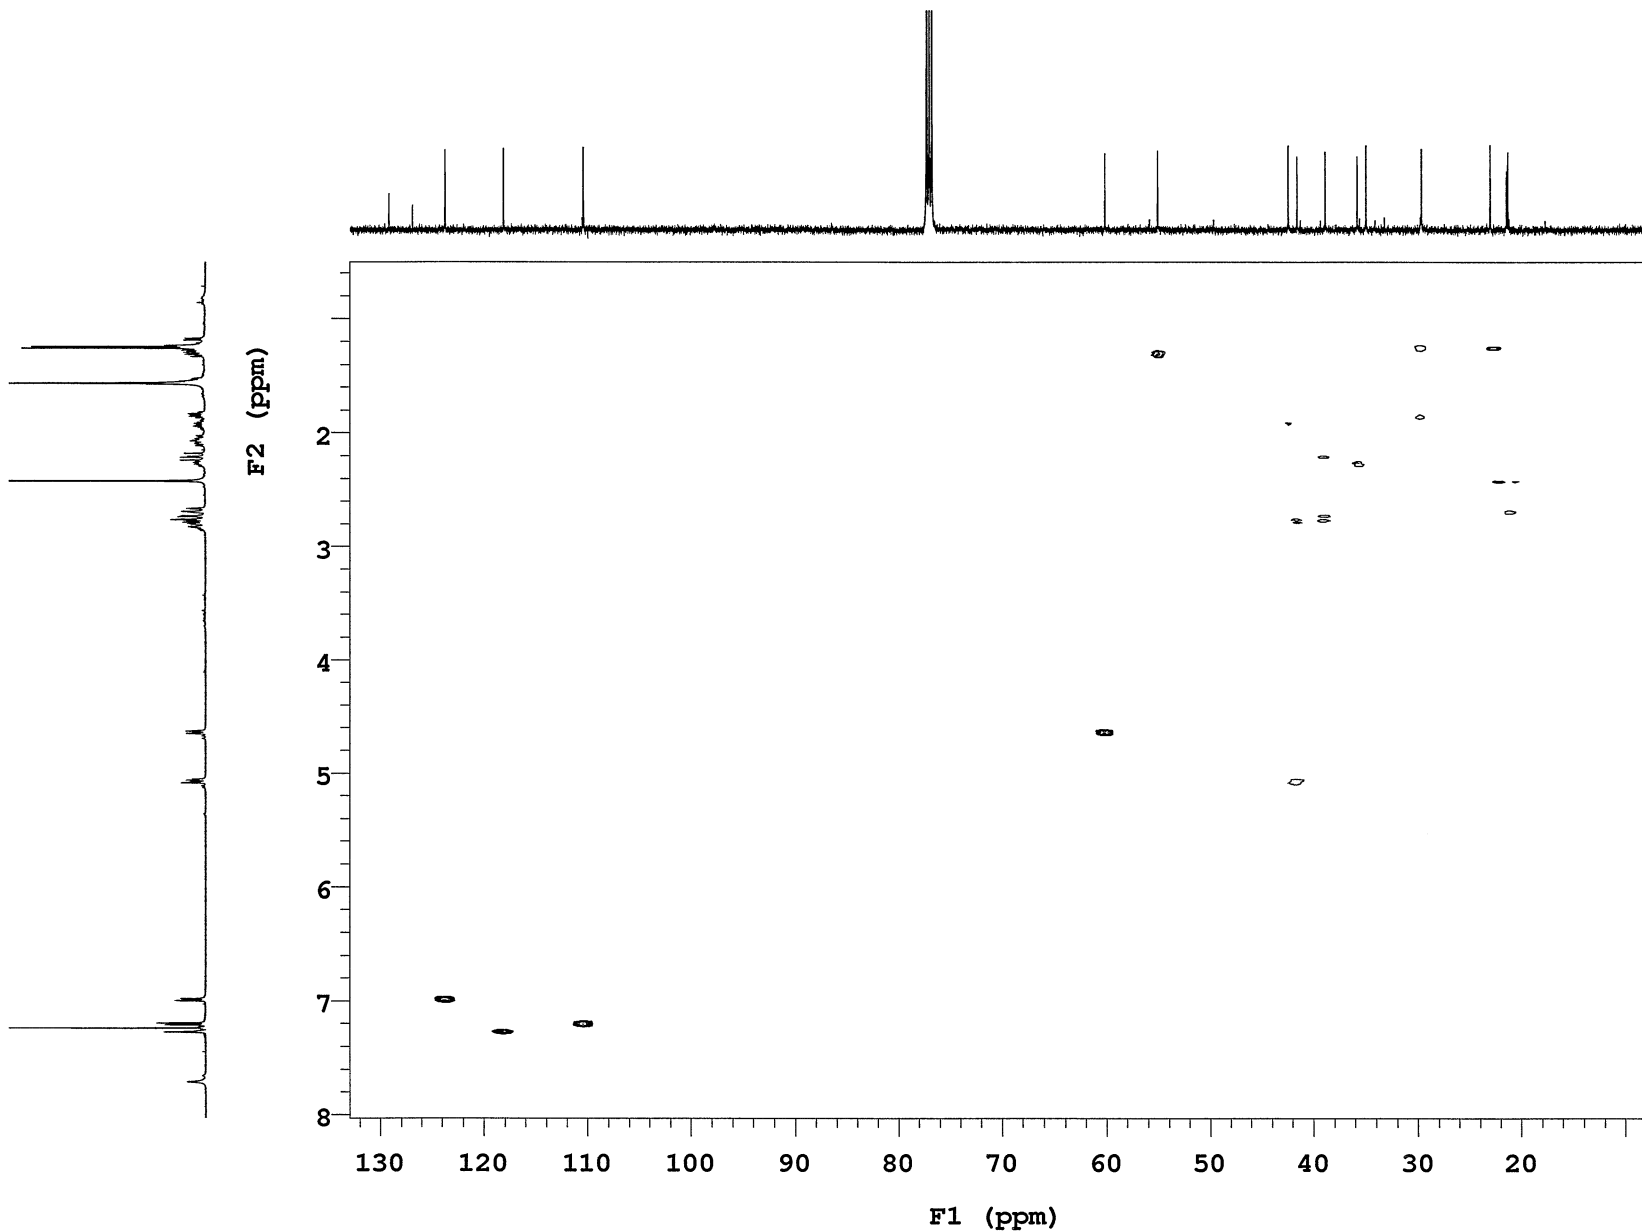



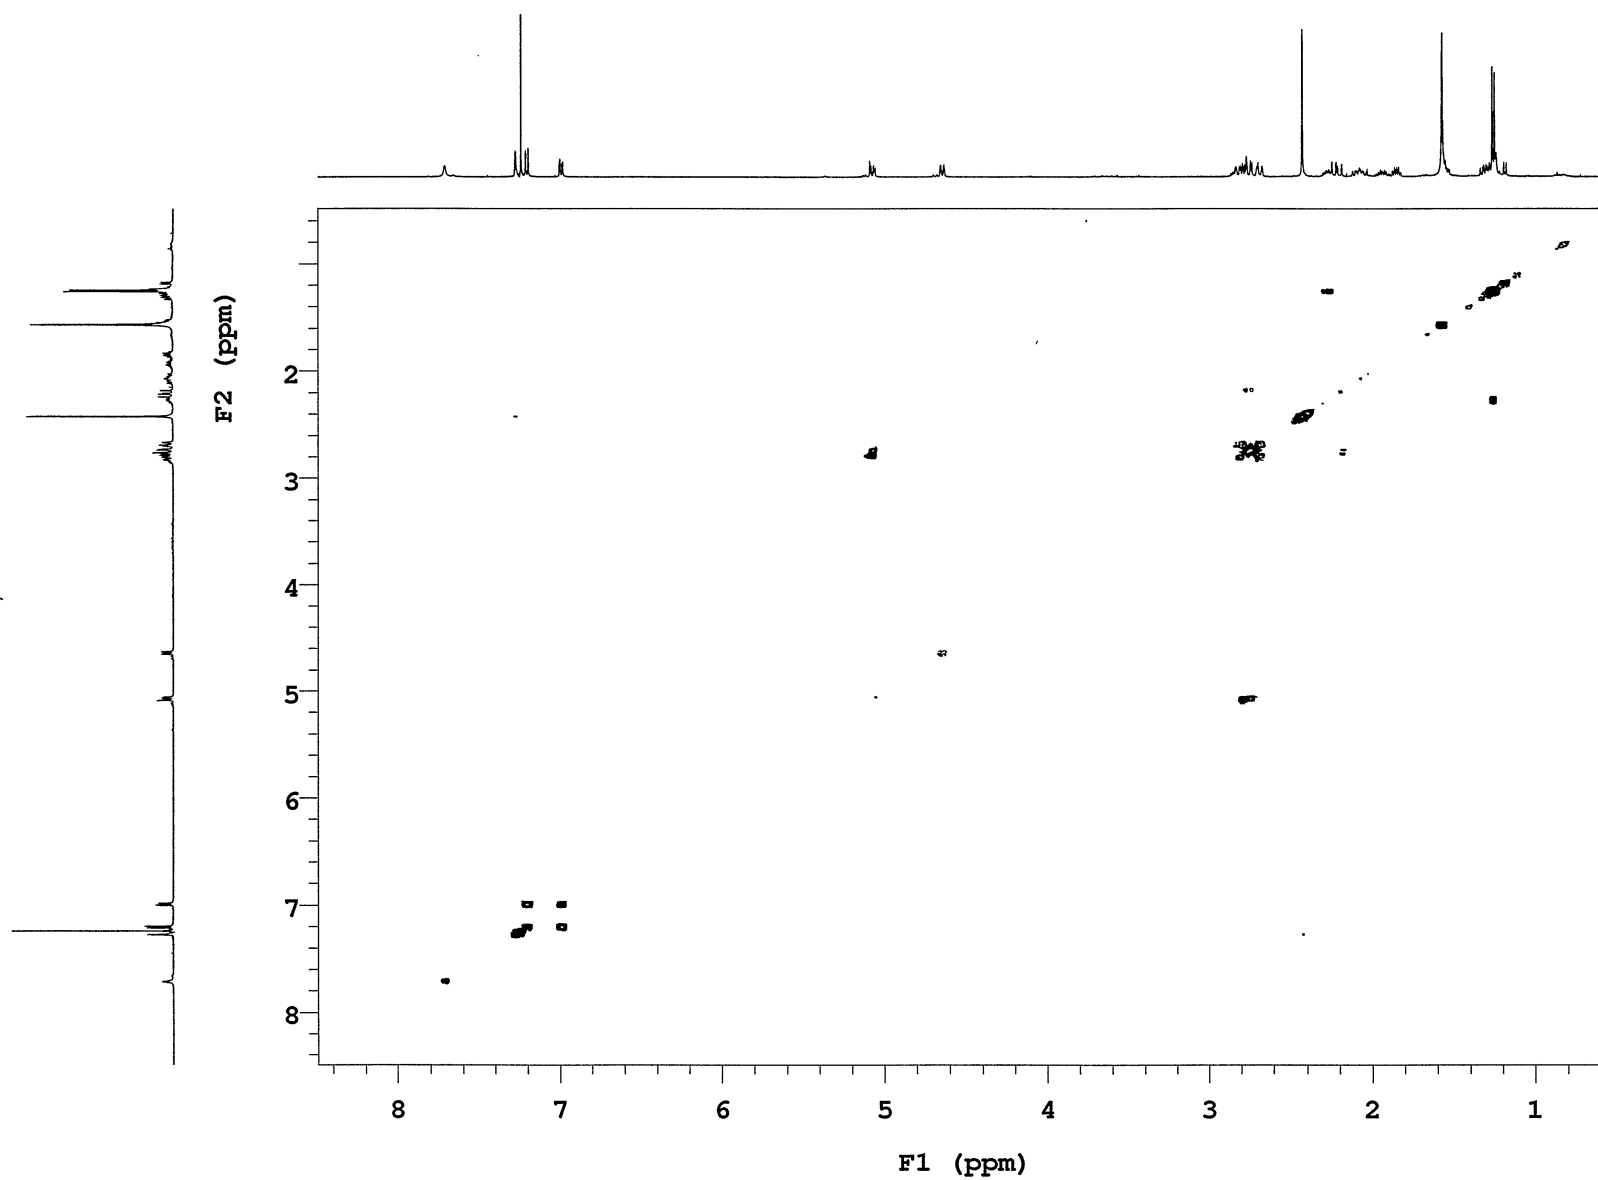

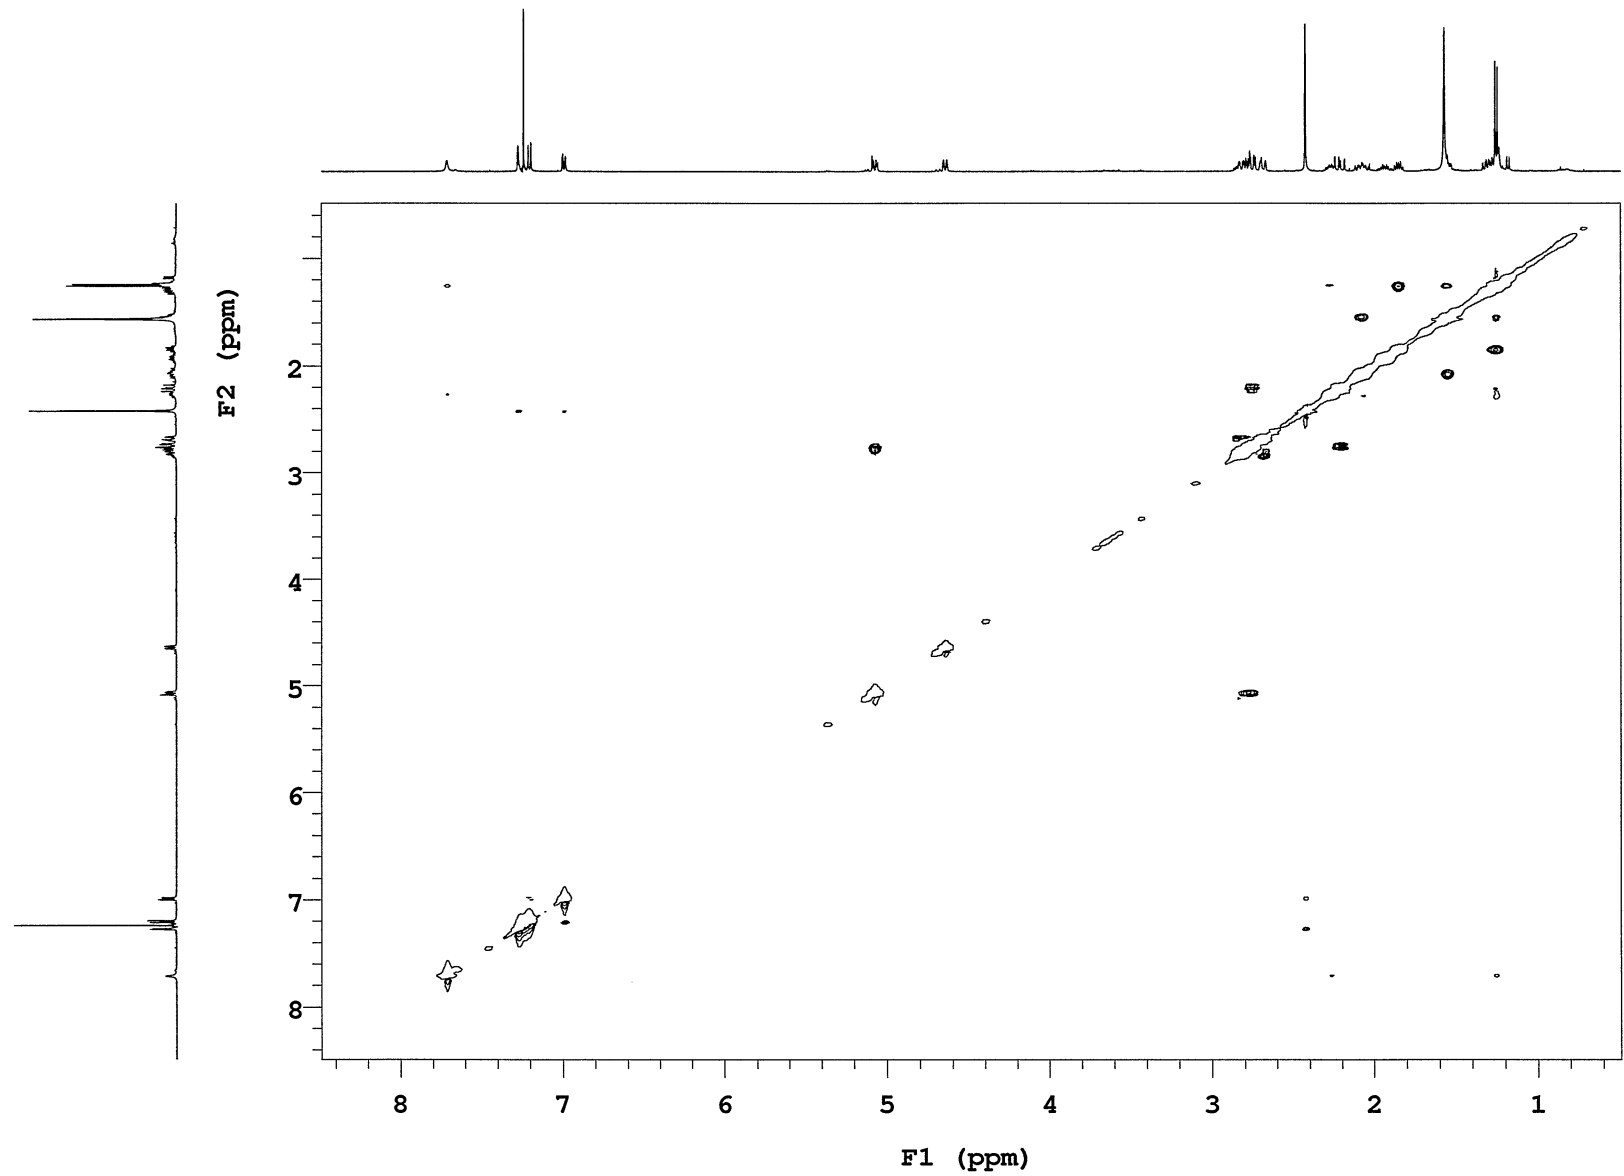

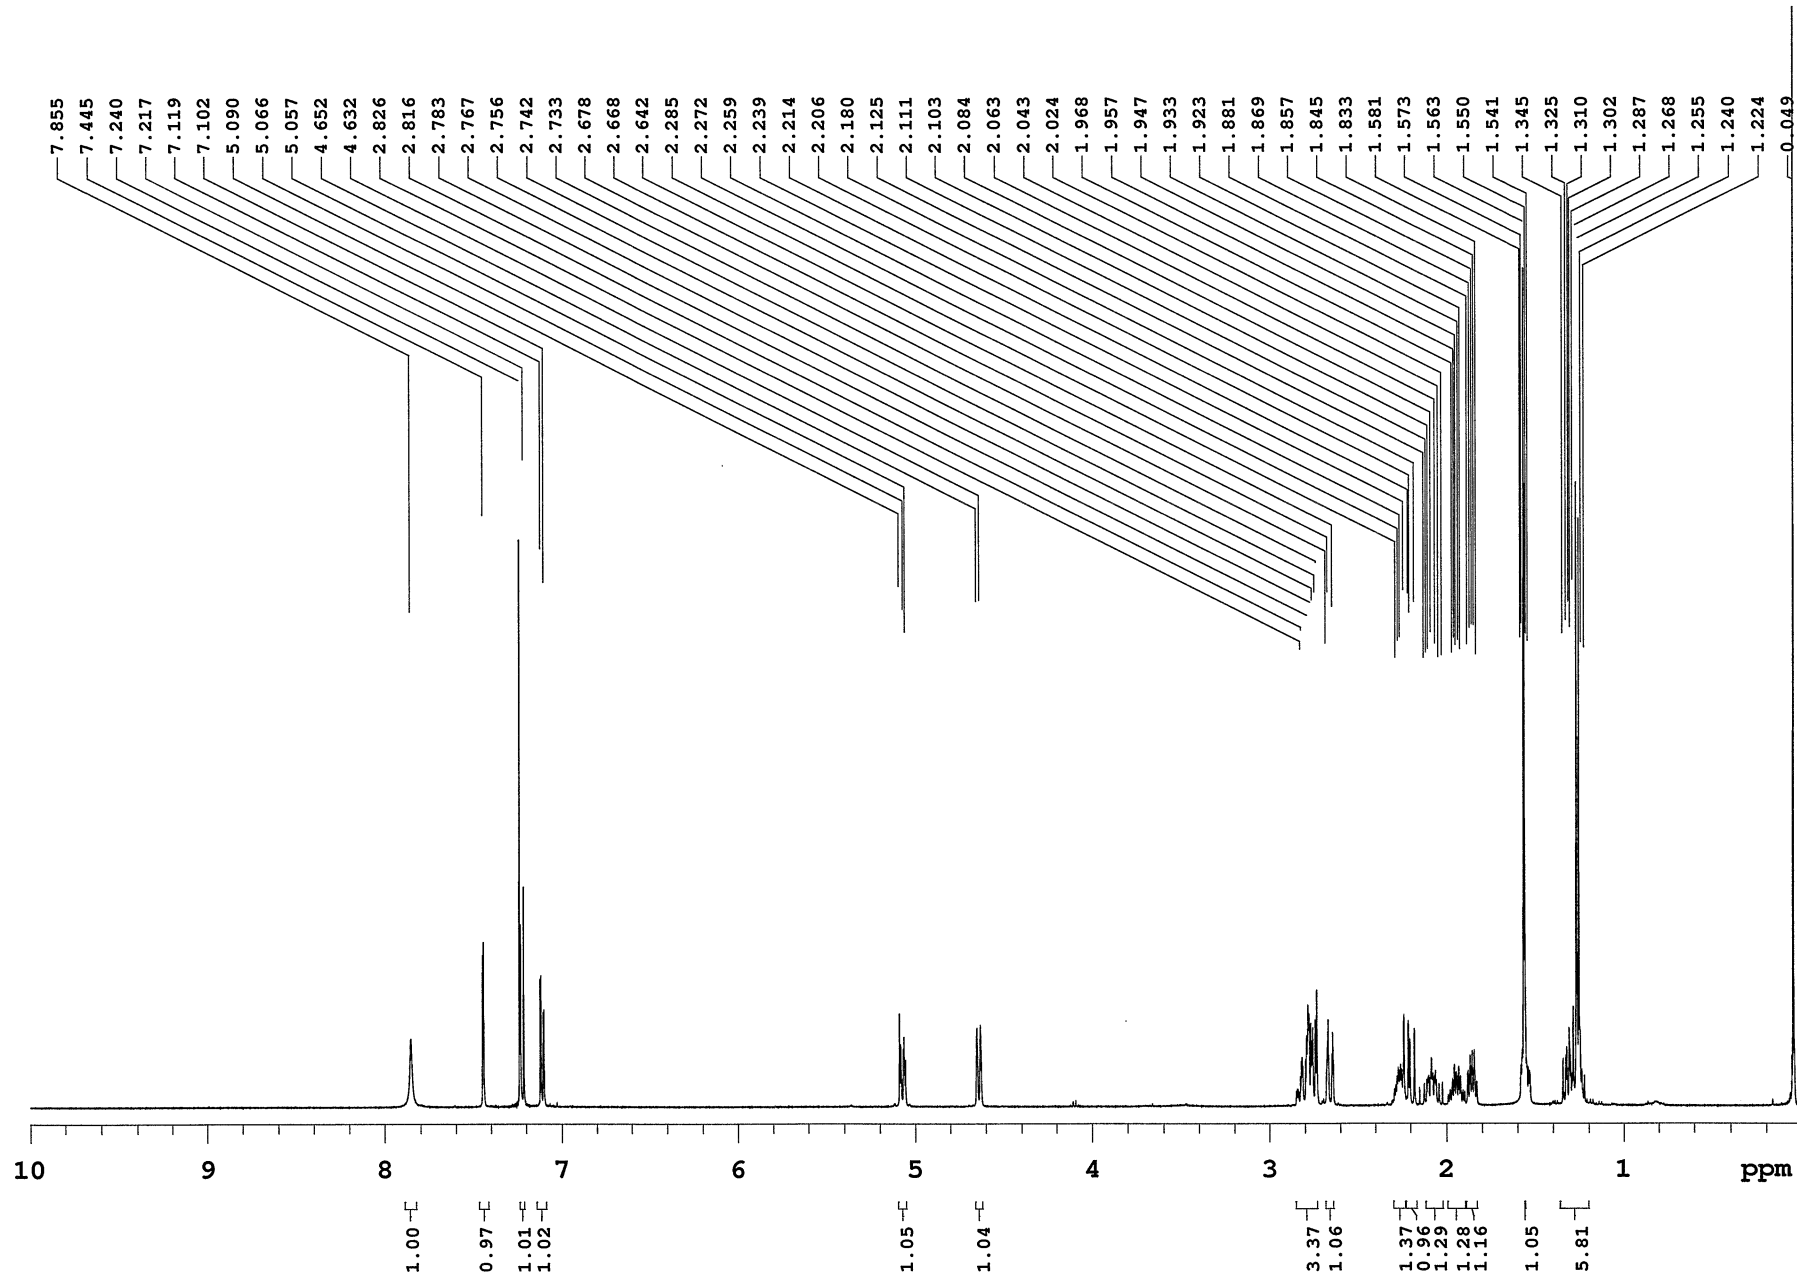

Sample Name **RRT-04-070**  
Date collected **2022-10-29**Pulse sequence **CARBON**  
Solvent **cdcl3**Temperature **25**  
Spectrometer **Agilent-NMR-inova500**Study owner **vnmr2**  
Operator **vnmr2**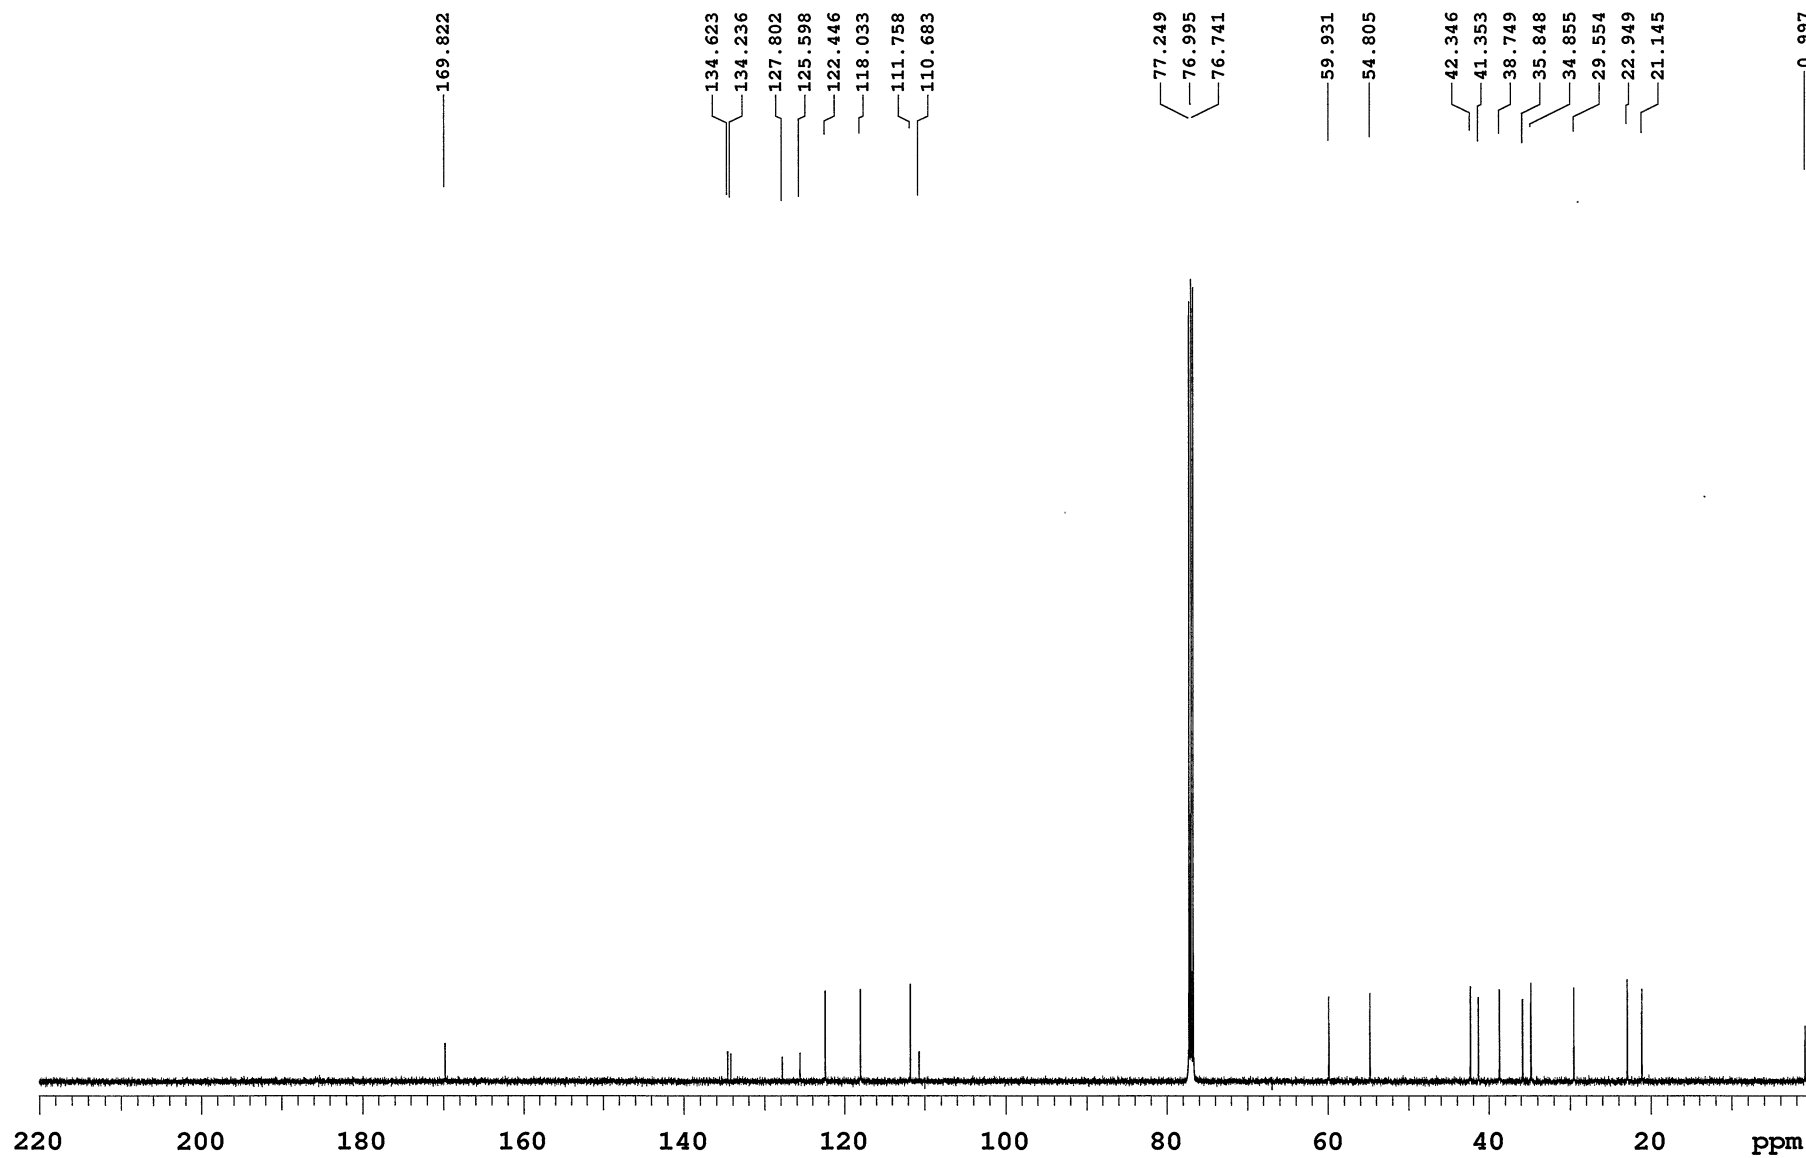

13C NMR (125 MHz, CDCl3) of compound 10e

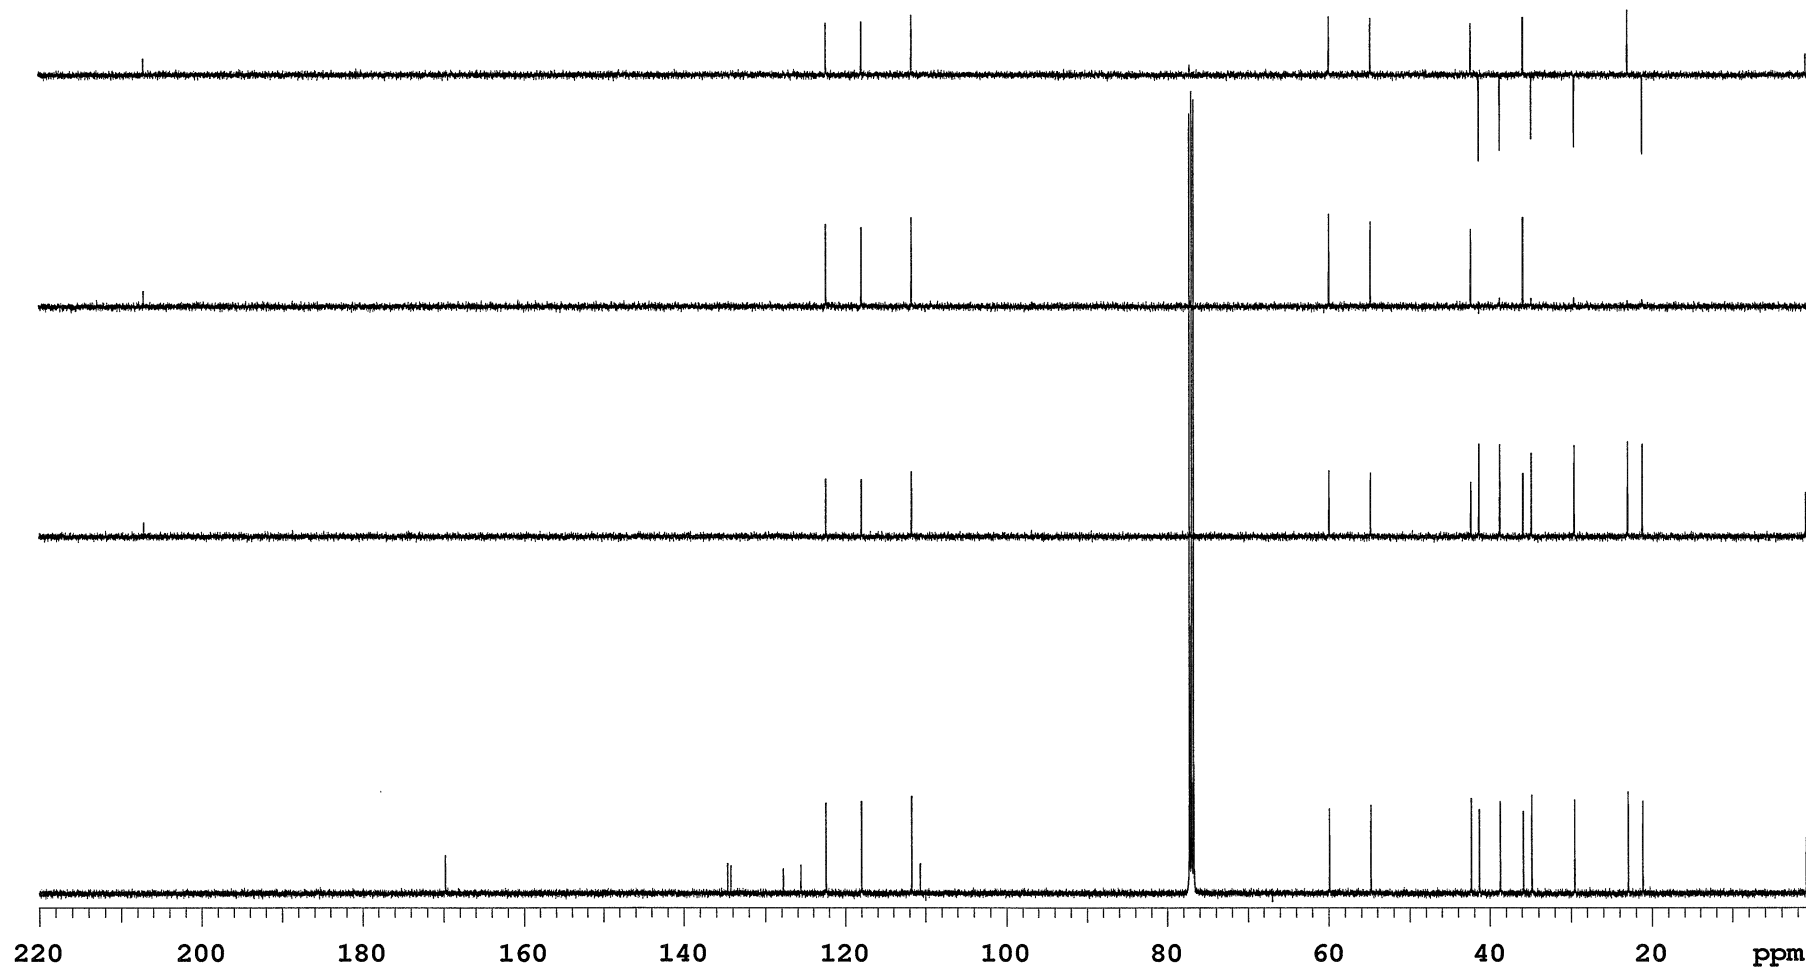

DEPT of compound 10e

Sample Name **RRT-04-070**  
Date collected **2022-10-30**

Pulse sequence **gHSQC**  
Solvent **cdcl3**

Temperature **25**  
Spectrometer **Agilent-NMR-inova500**

Study owner **vnmr2**  
Operator **vnmr2**

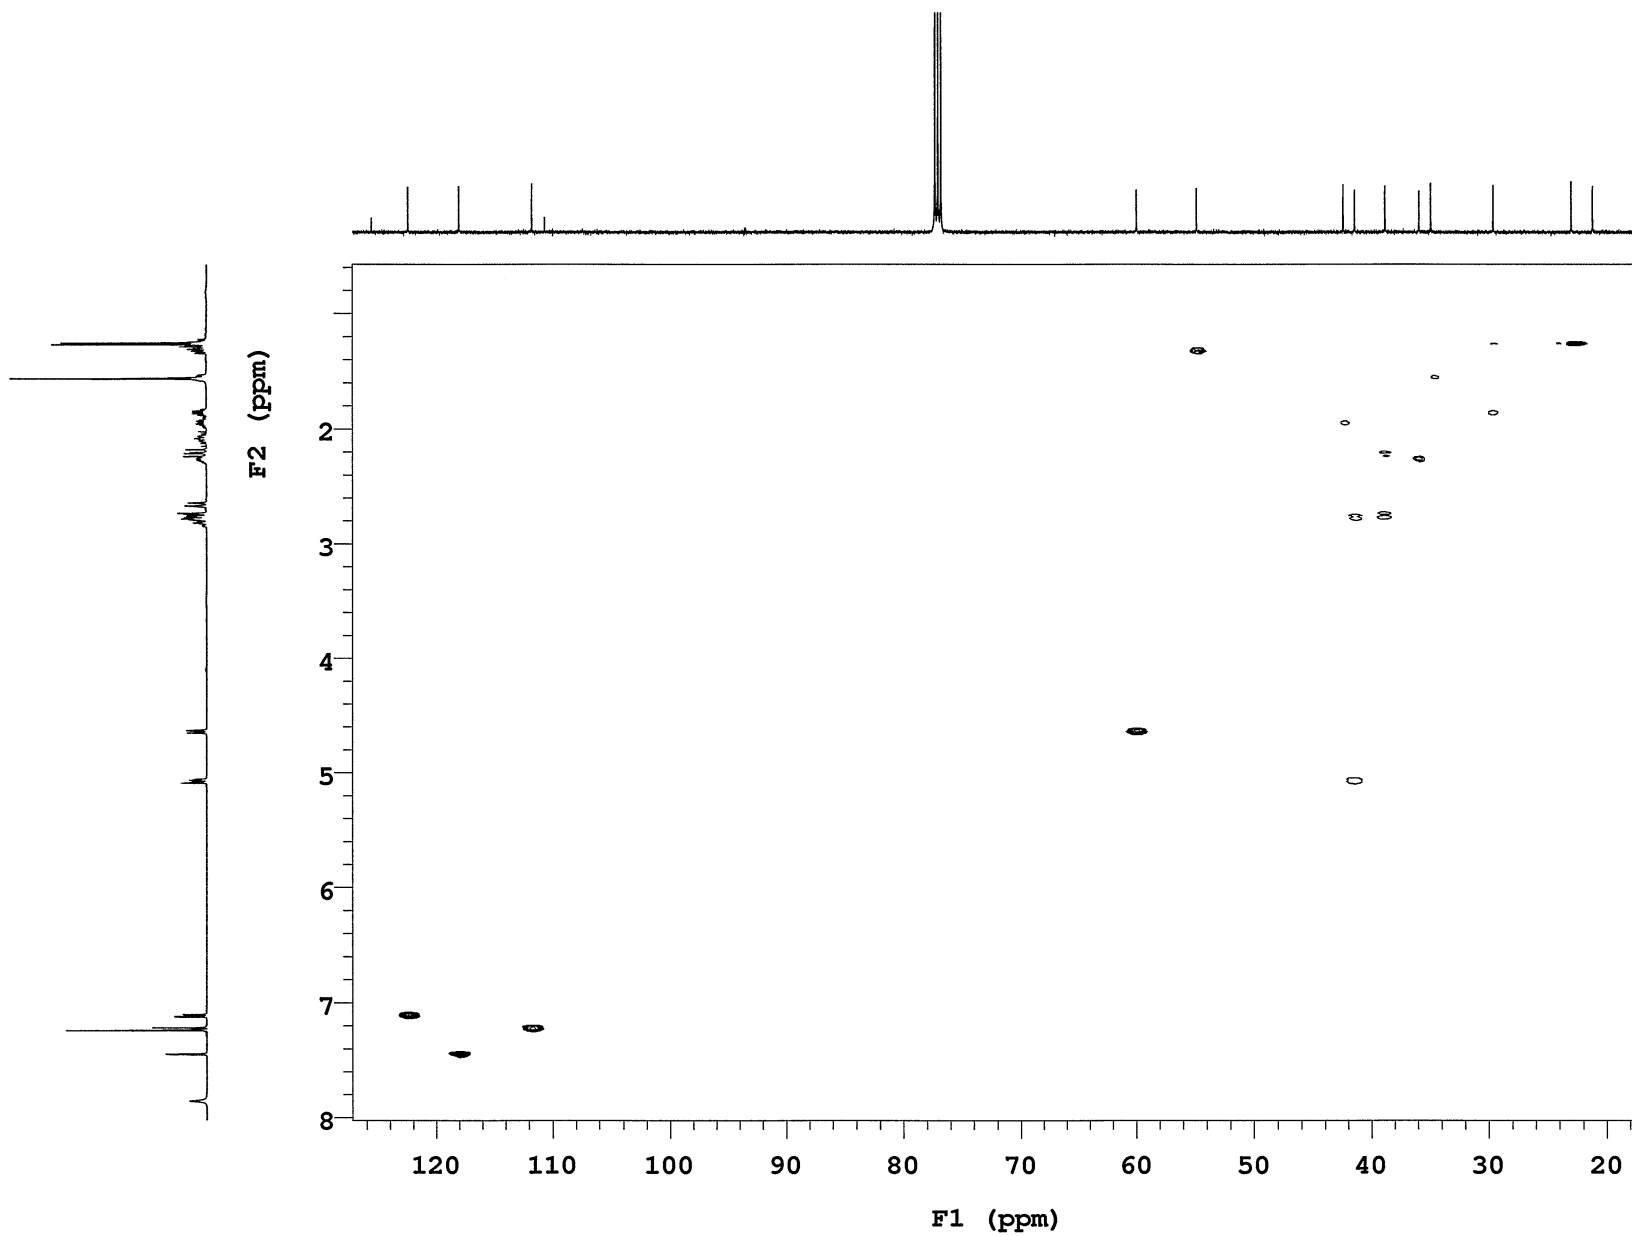

Sample Name RRT-04-070  
Date collected 2022-10-30

Pulse sequence gCOSY  
Solvent cdcl3

Temperature 25  
Spectrometer Agilent-NMR-inova500

Study owner vnmr2  
Operator vnmr2

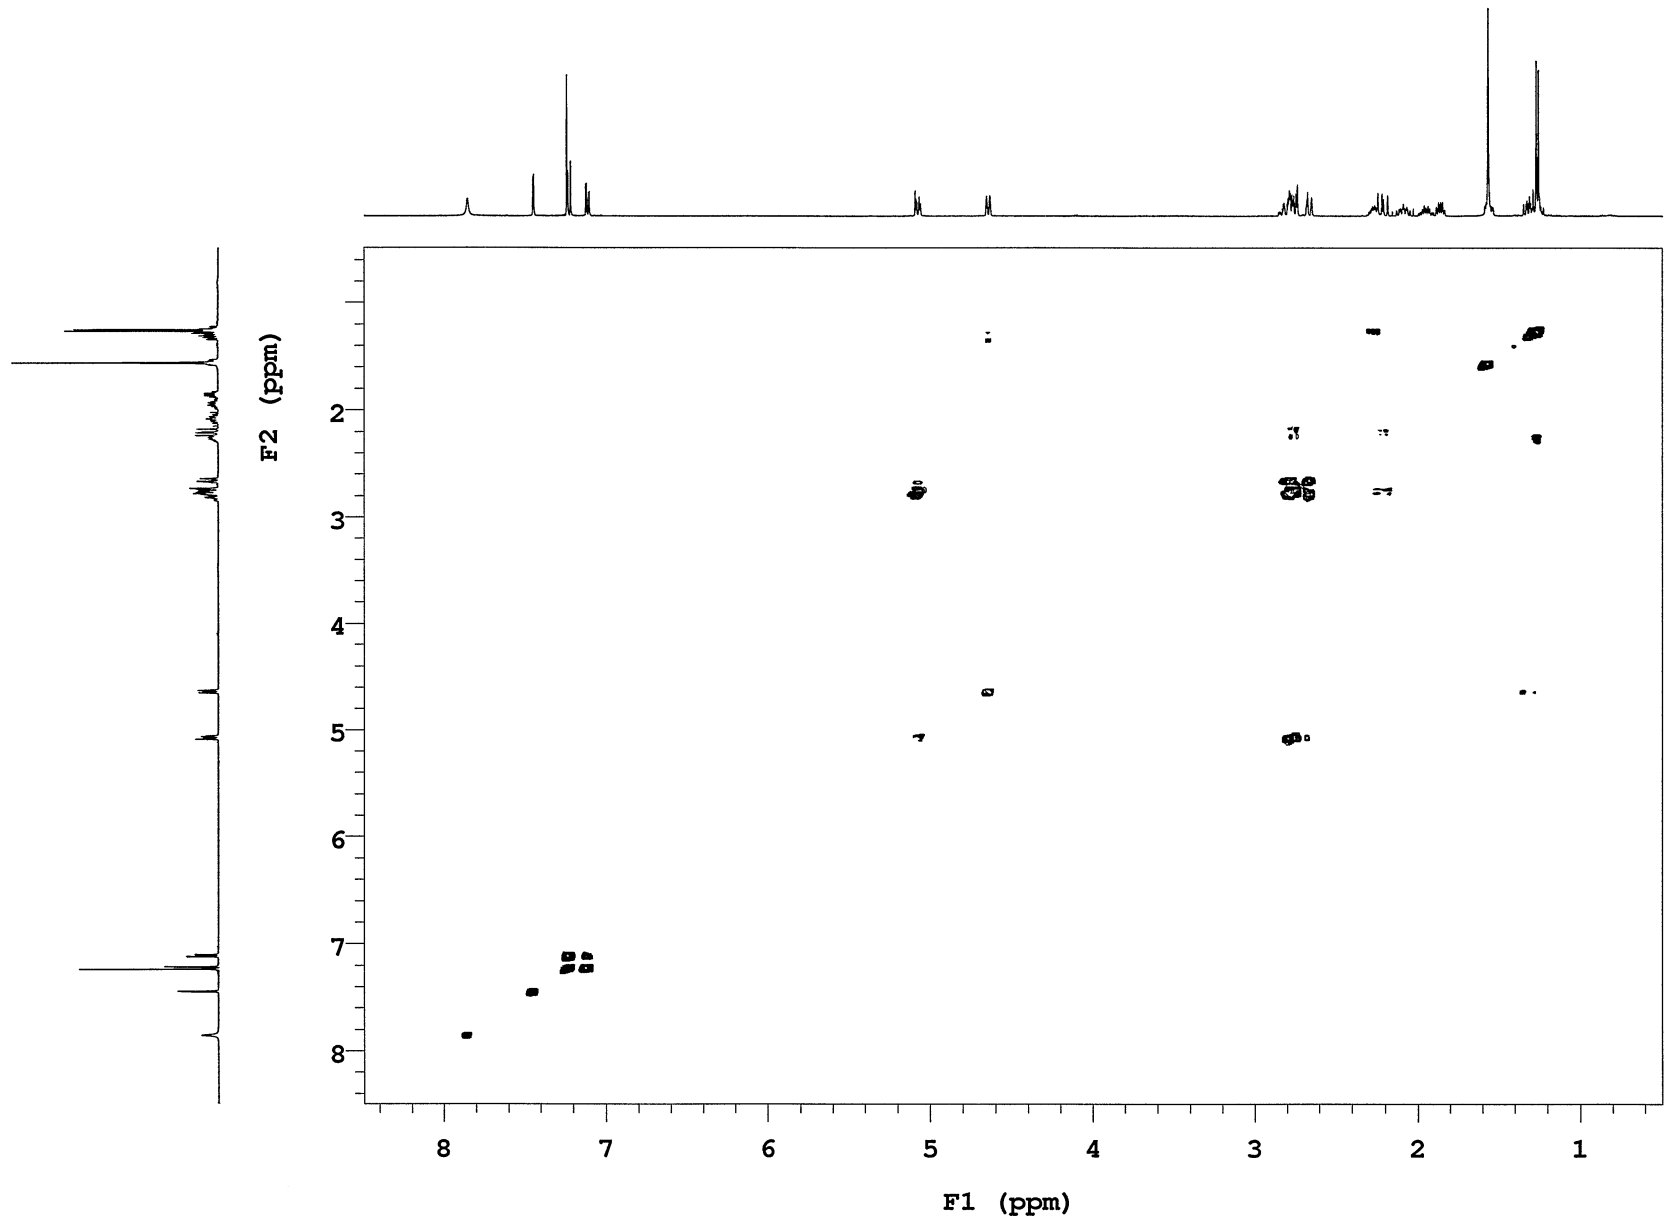

Sample Name RRT-04-070  
Date collected 2022-10-30

Pulse sequence NOESY  
Solvent cdcl3

Temperature 25  
Spectrometer Agilent-NMR-inova500

Study owner vnmr2  
Operator vnmr2

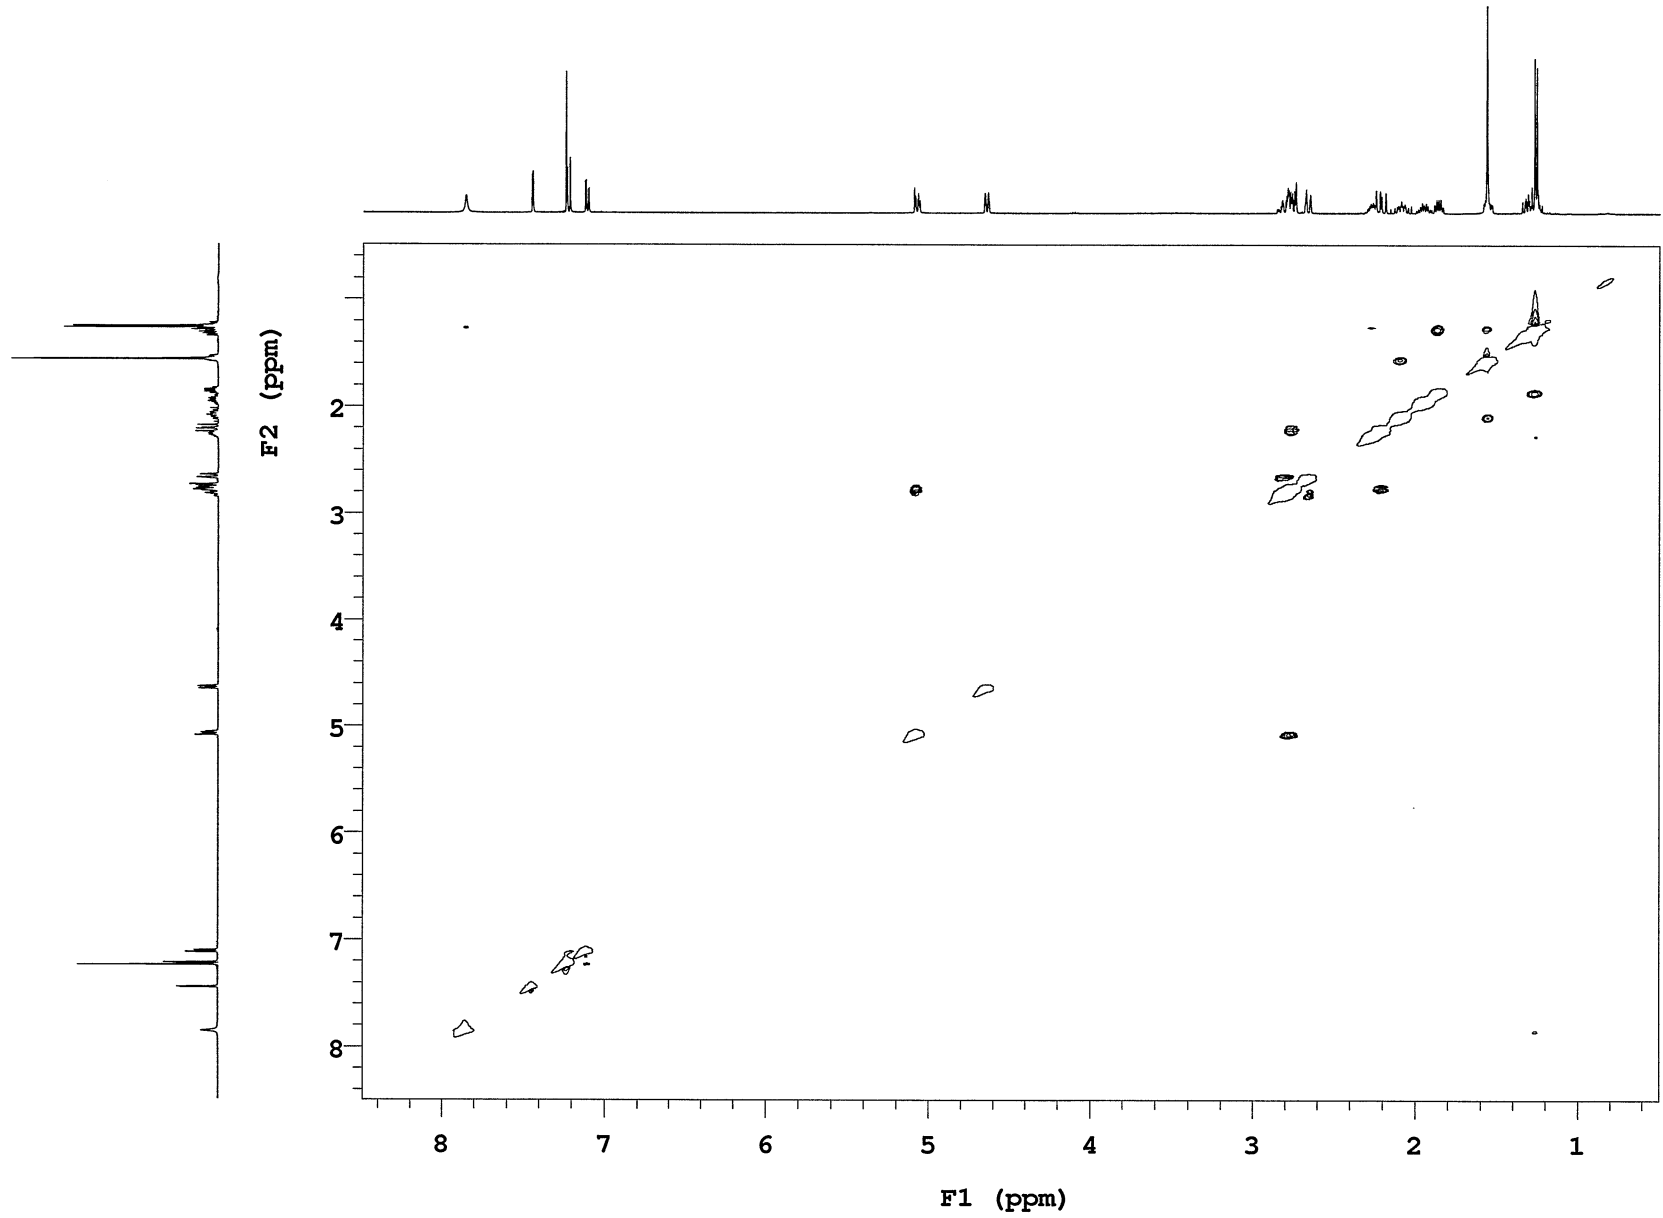

NOESY of compound 10e



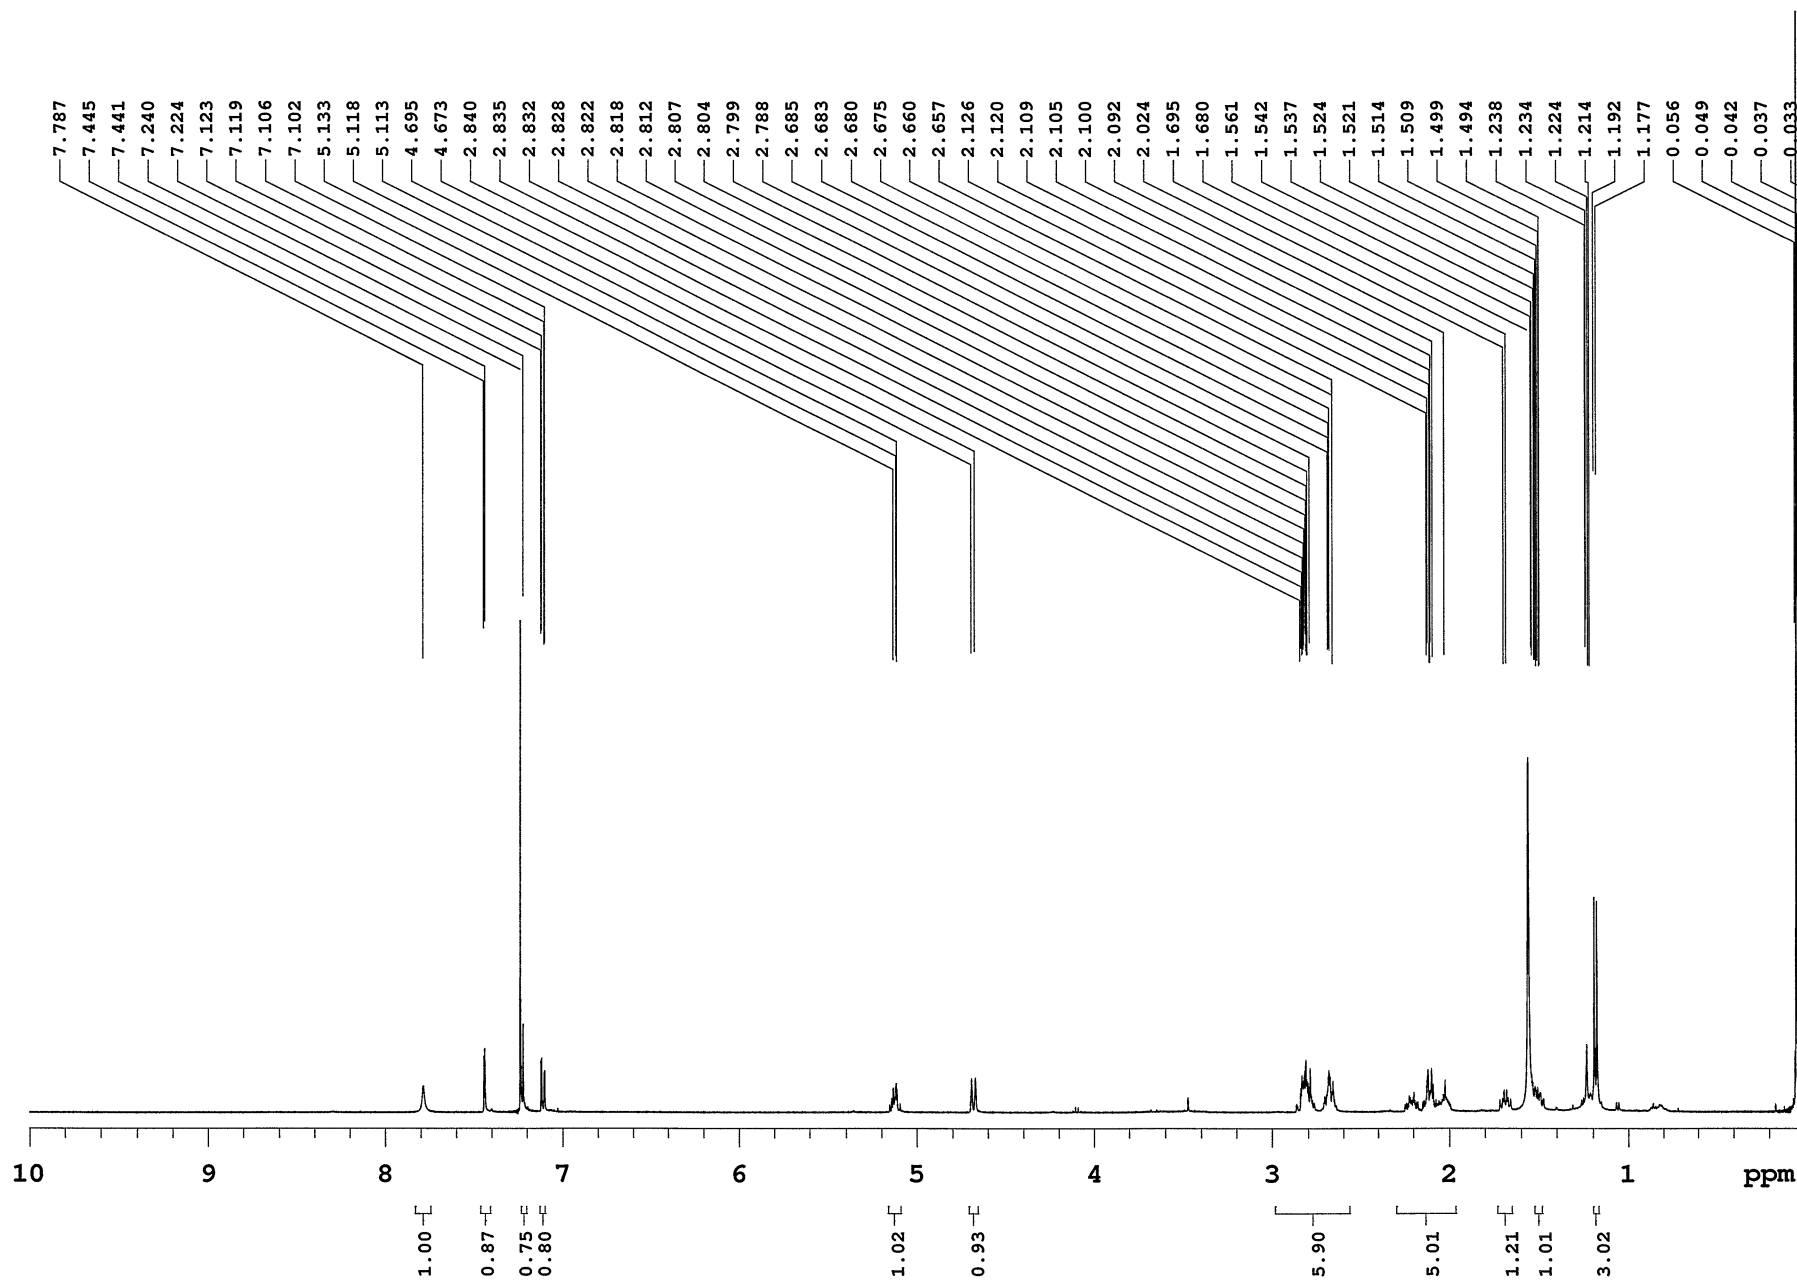

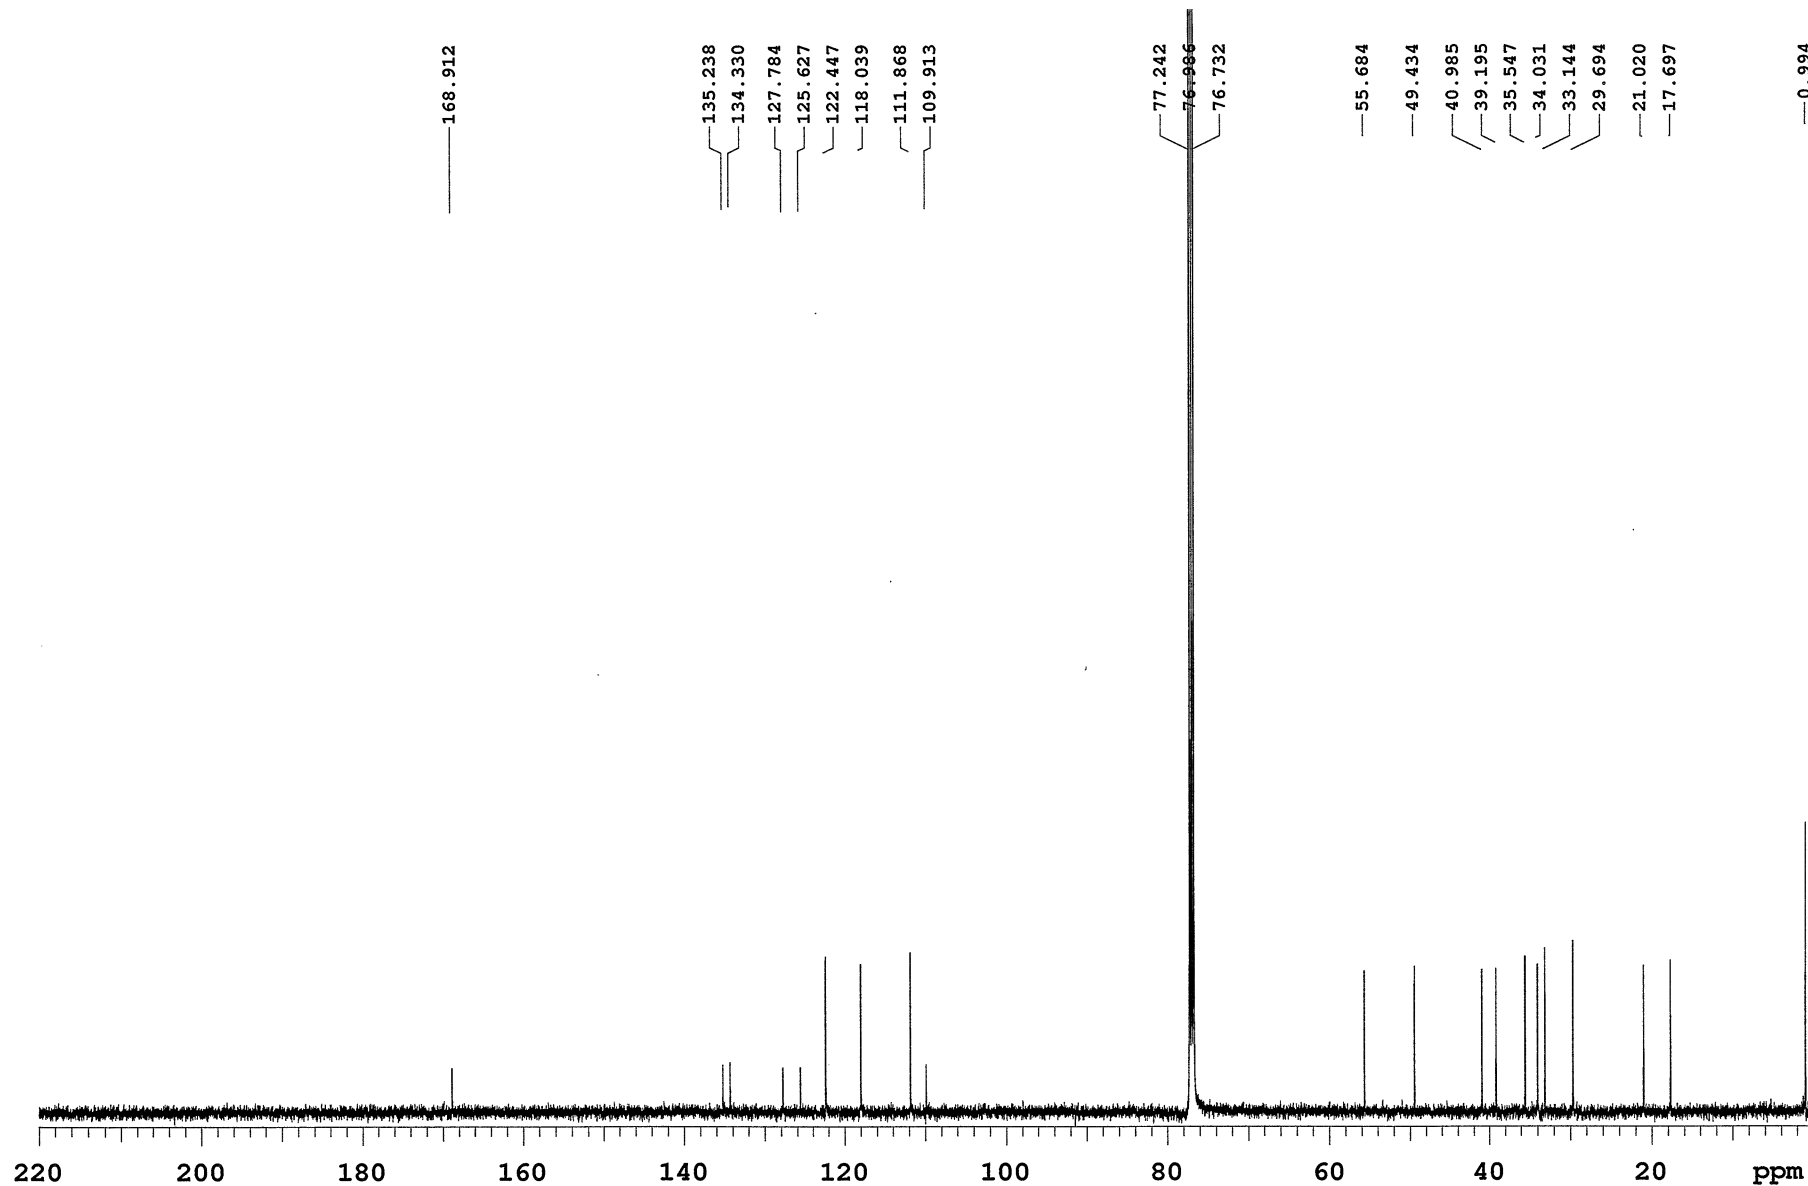

13C NMR (125 MHz, CDCl3) of compound 11e

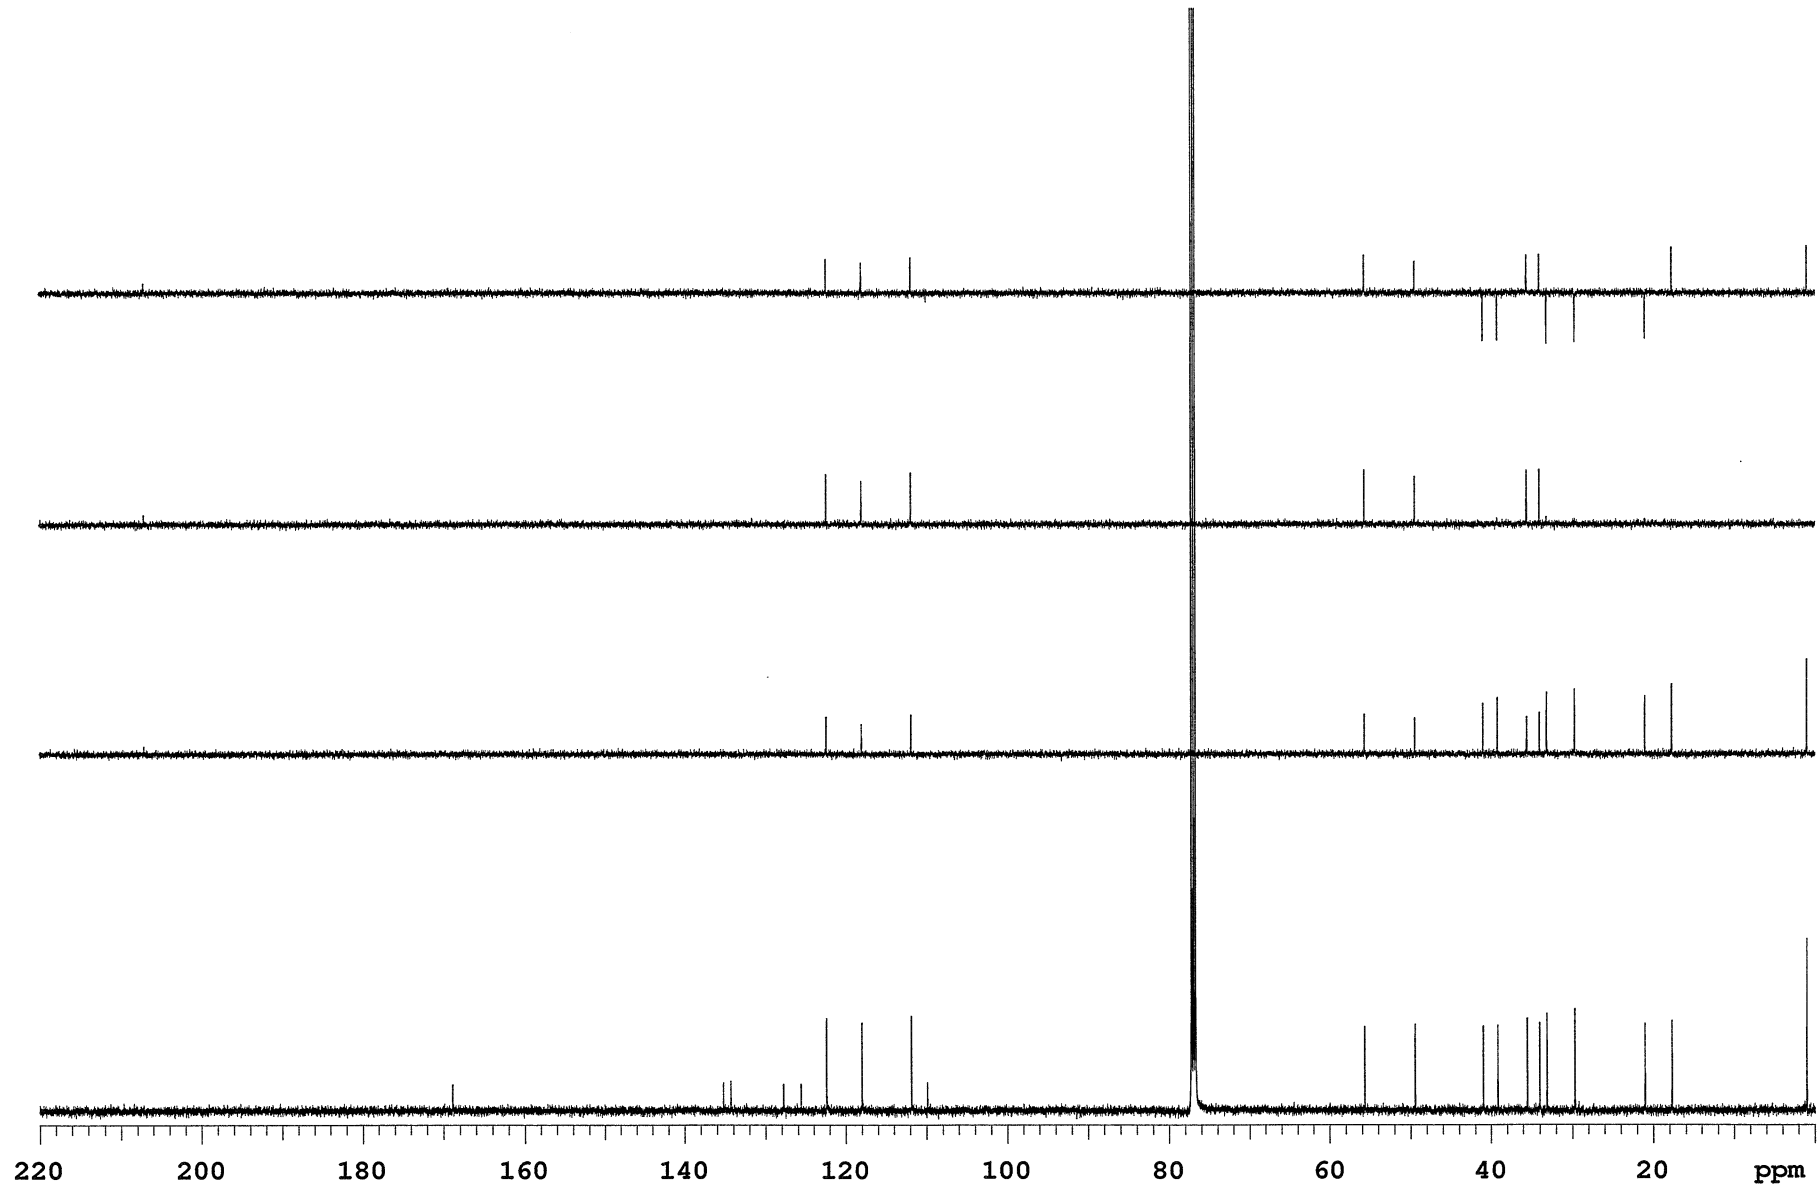

DEPT of compound 11e

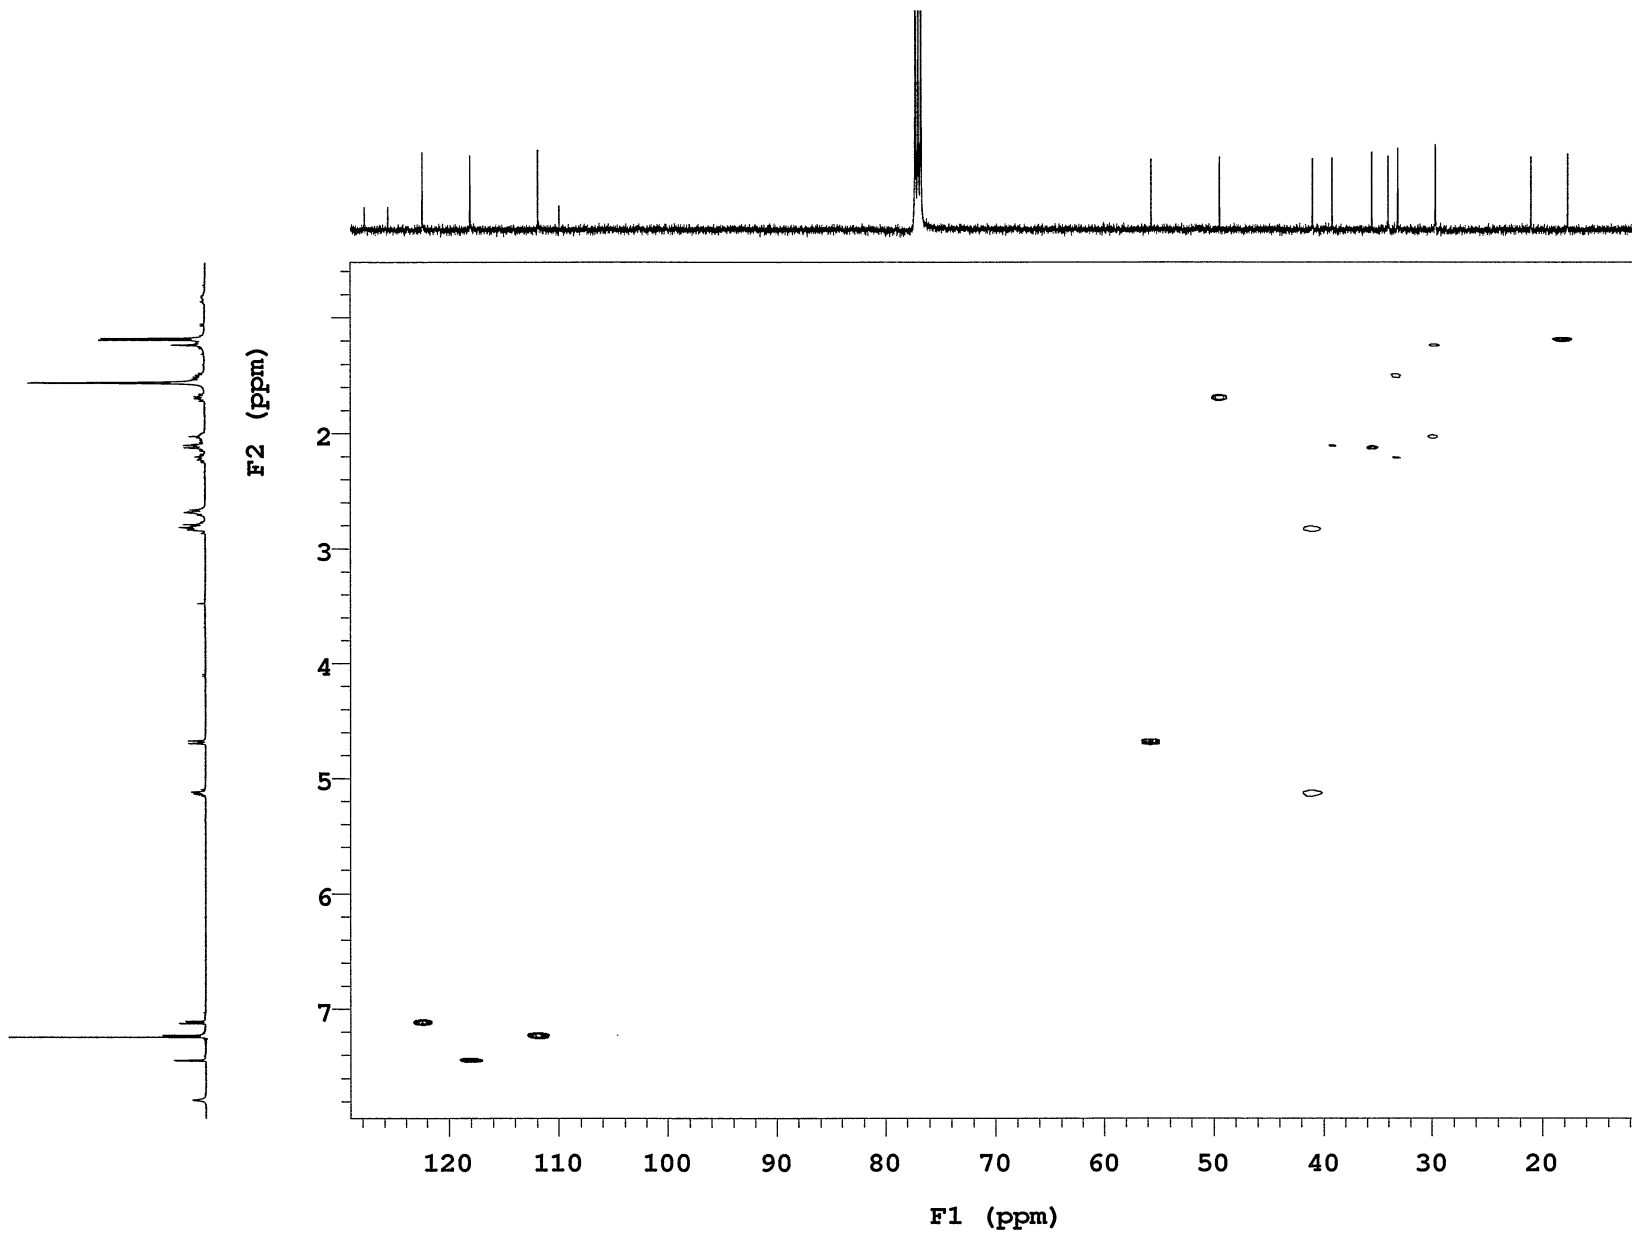

HSQC of compound 11e

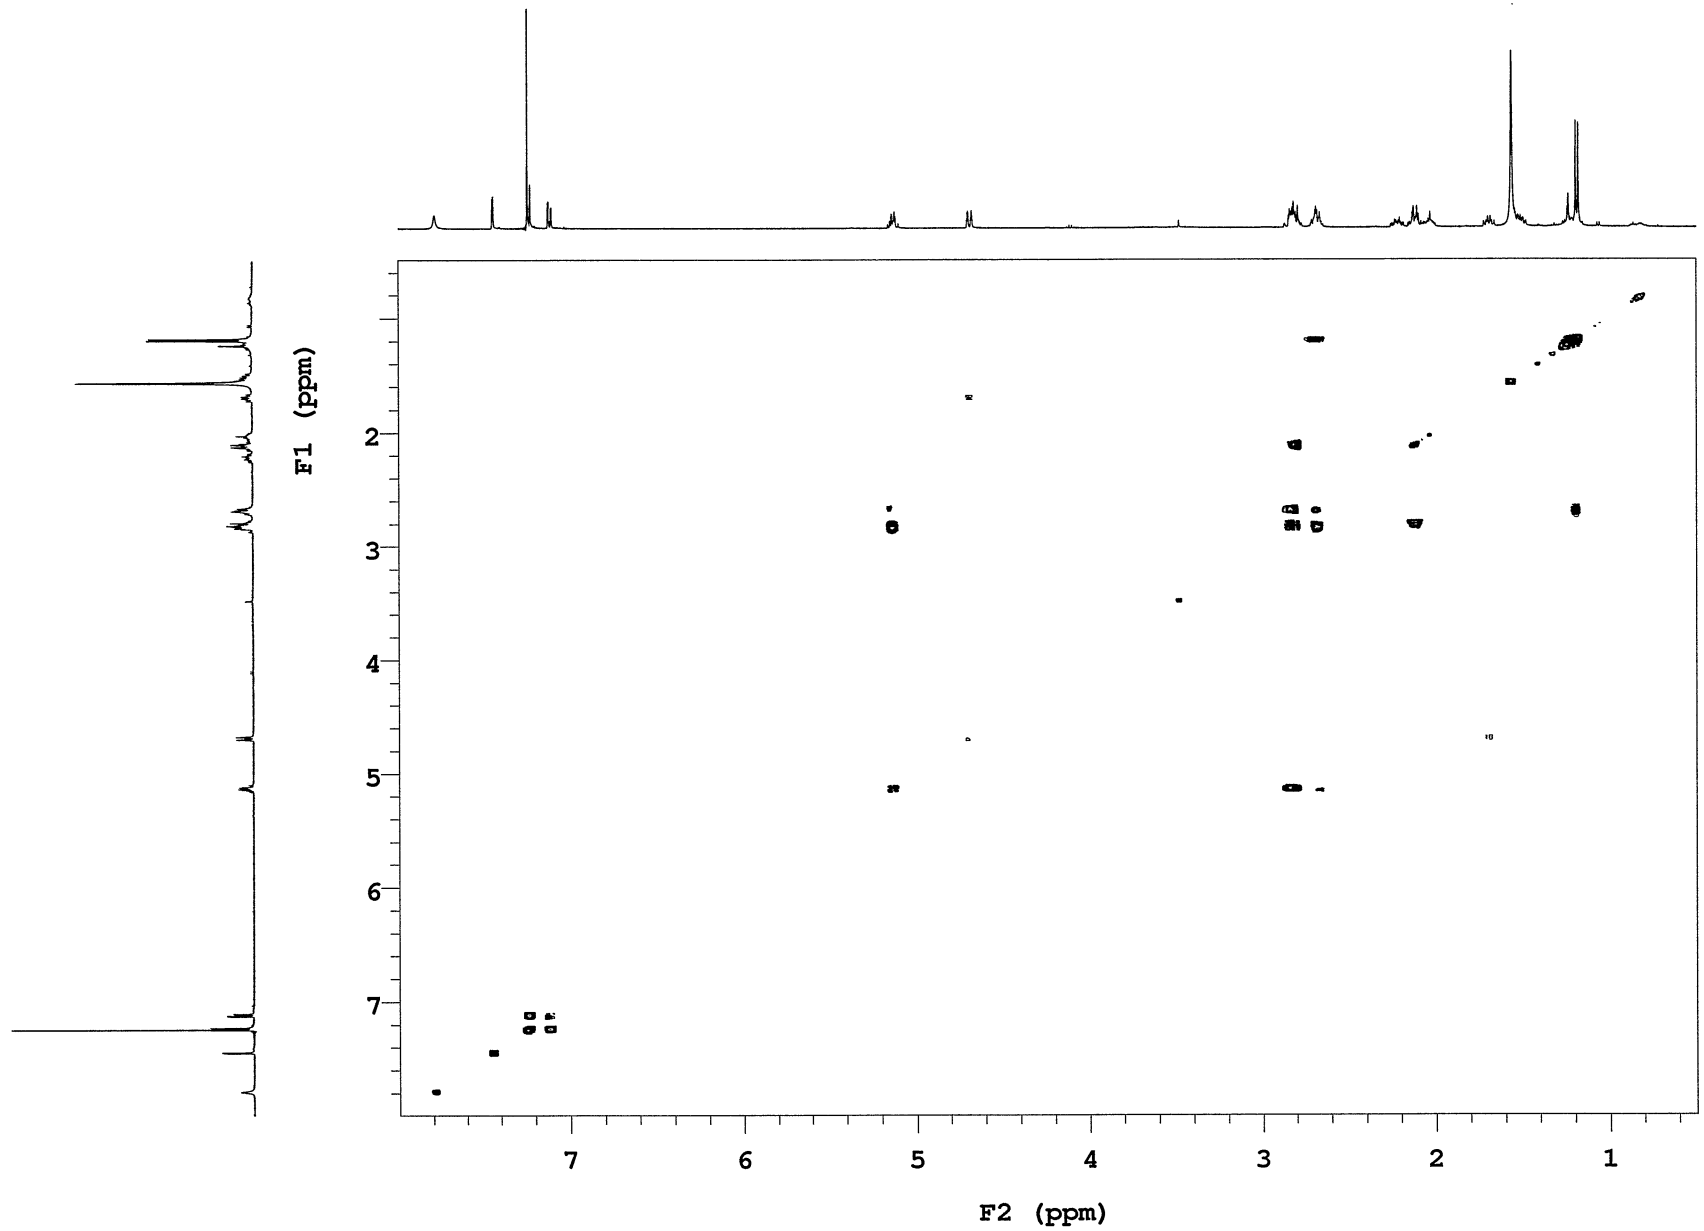

COSY of compound 11e

Sample Name RRT-04-070-F-I  
Date collected 2022-11-13

Pulse sequence NOESY  
Solvent cdcl3

Temperature 25  
Spectrometer Agilent-NMR-inova500

Study owner vnmr2  
Operator vnmr2

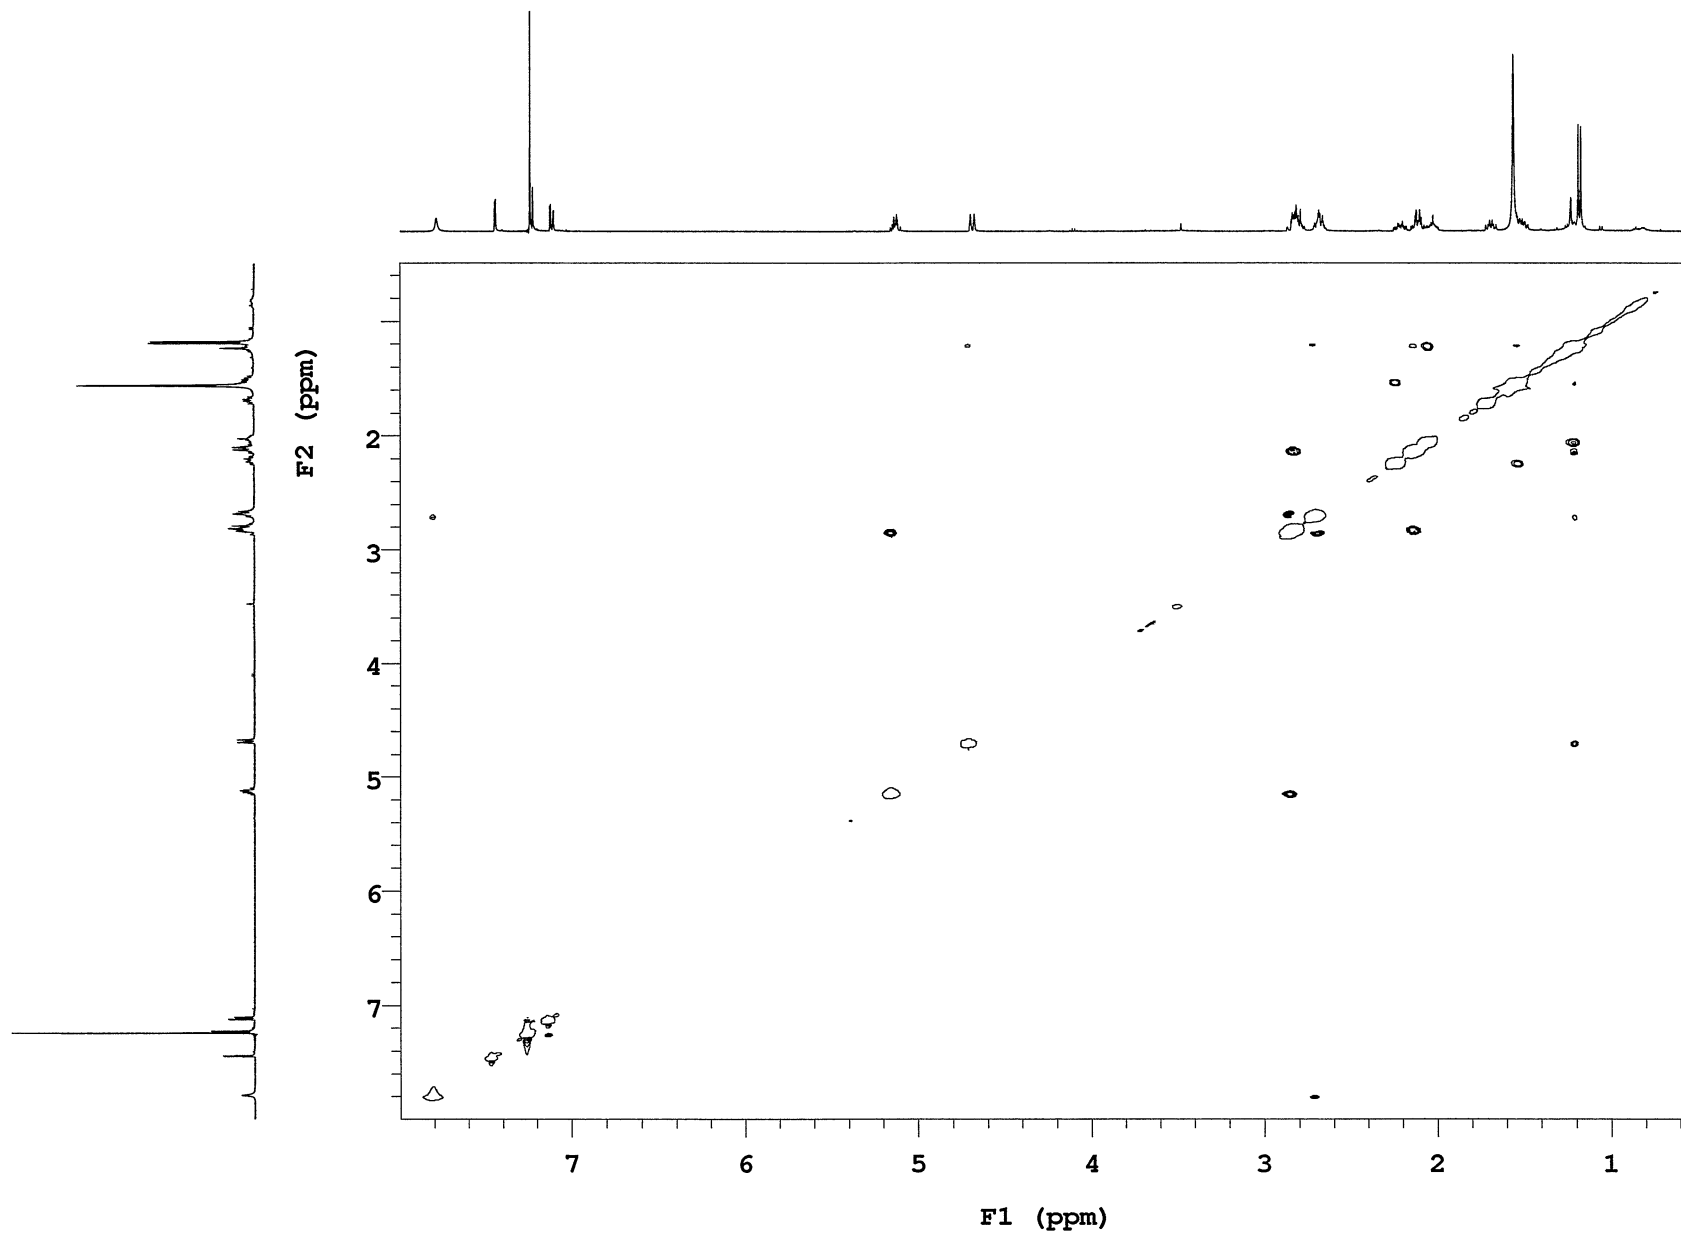

NOESY of compound 11e

Sample Name RRT-231\_and\_RRT-263  
Date collected 2023-02-13

Pulse sequence PROTON  
Solvent cdcl3

Temperature 25  
Spectrometer Agilent-NMR-inova500

Study owner vnmr2  
Operator vnmr2

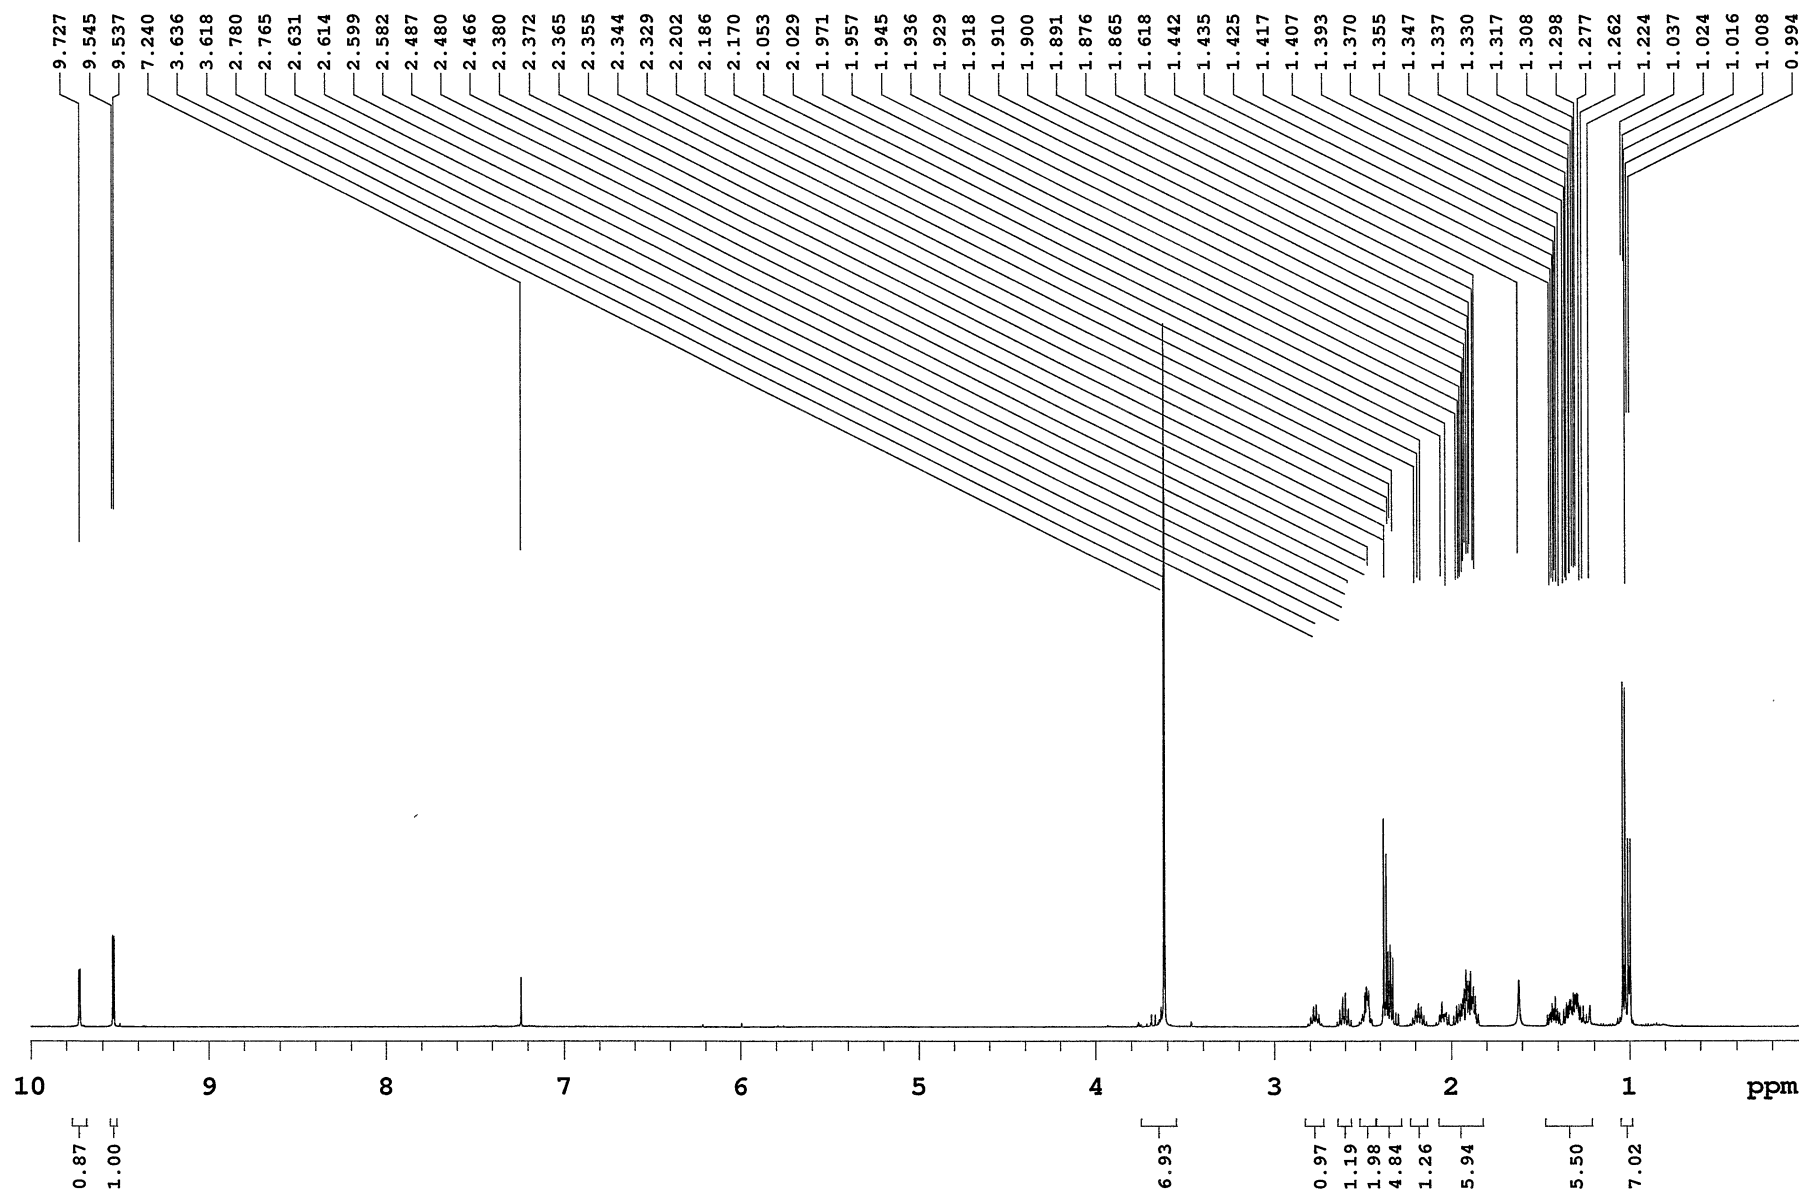

Sample Name RRT-231\_and\_RRT-263  
Date collected 2023-02-13

Pulse sequence CARBON  
Solvent cdcl3

Temperature 25  
Spectrometer Agilent-NMR-inova500

Study owner vnmr2  
Operator vnmr2

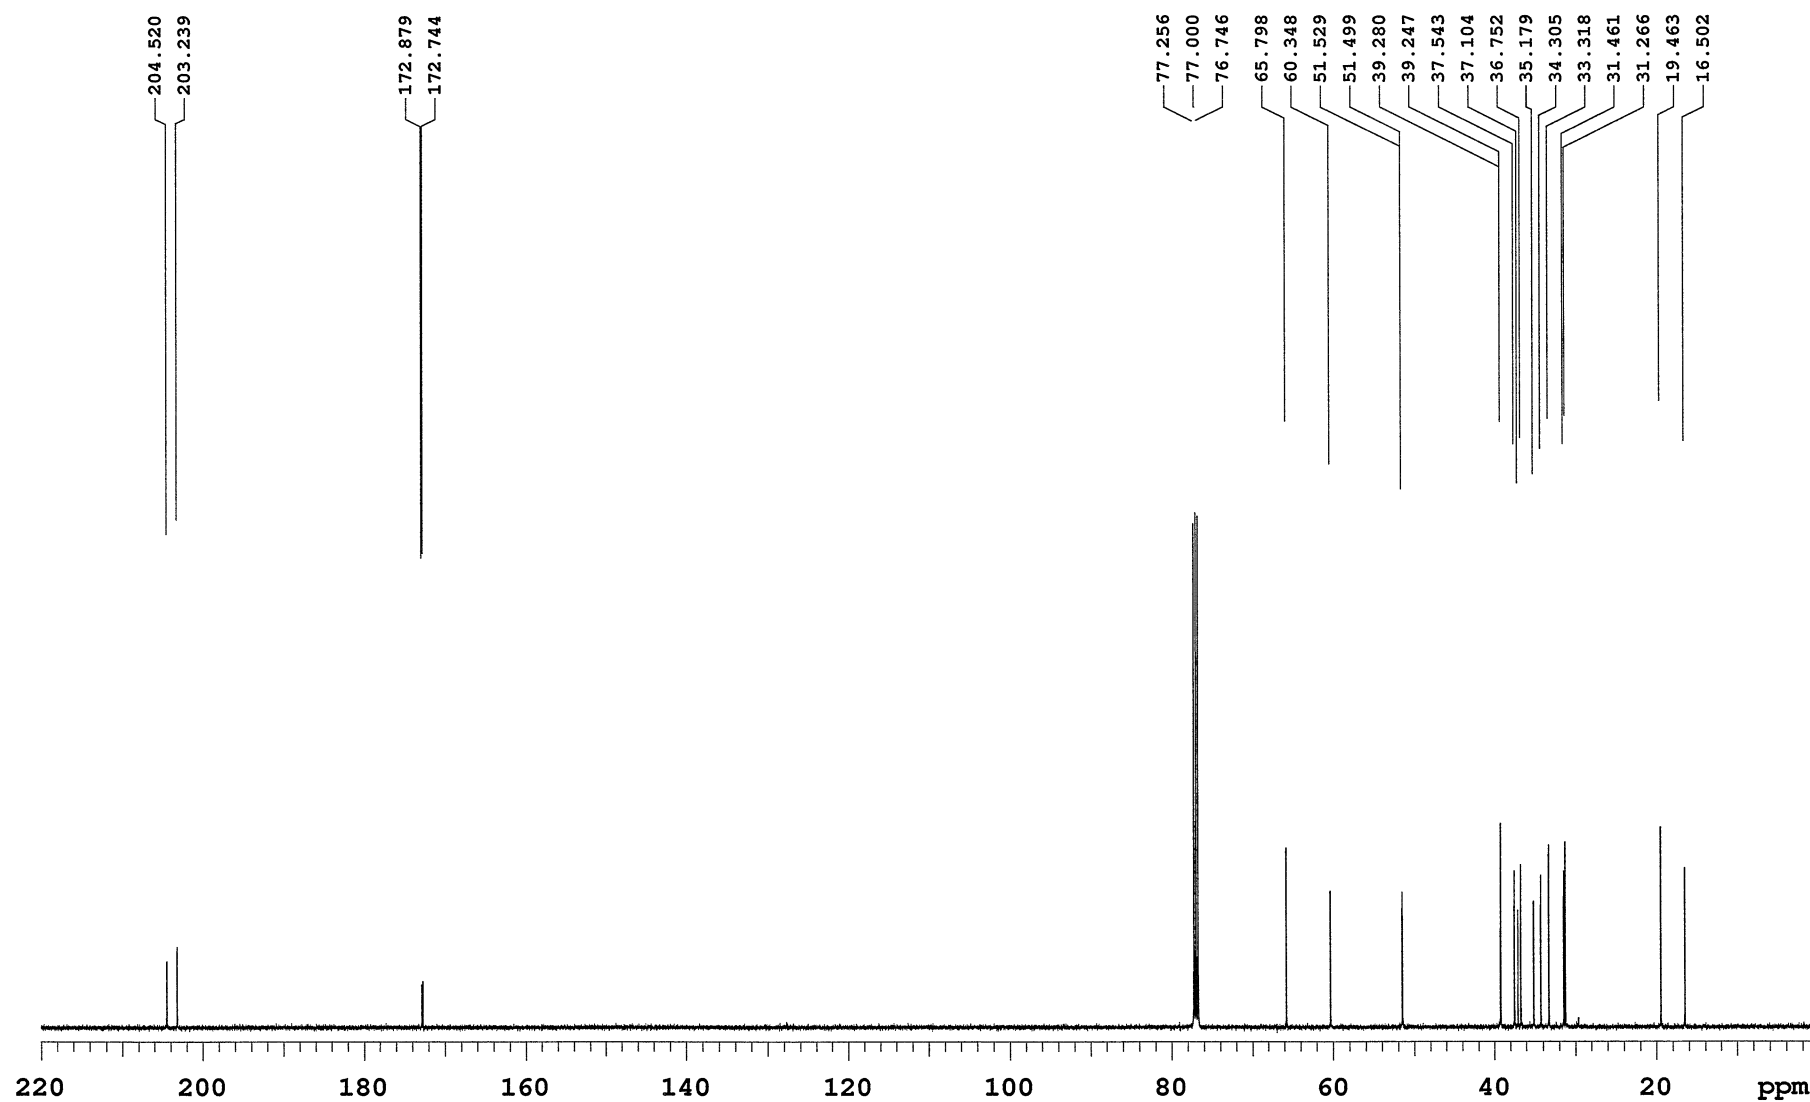

13C NMR (125 MHz, CDCl3) of the mixture of of **2** and **12**  
(Scheme 3)



Sample Name **RRT-231\_and\_RRT-263**  
Date collected **2023-02-13**

Pulse sequence **DEPT**  
Solvent **cdcl3**

Temperature **25**  
Spectrometer **Agilent-NMR-inova500**

Study owner **vnmr2**  
Operator **vnmr2**

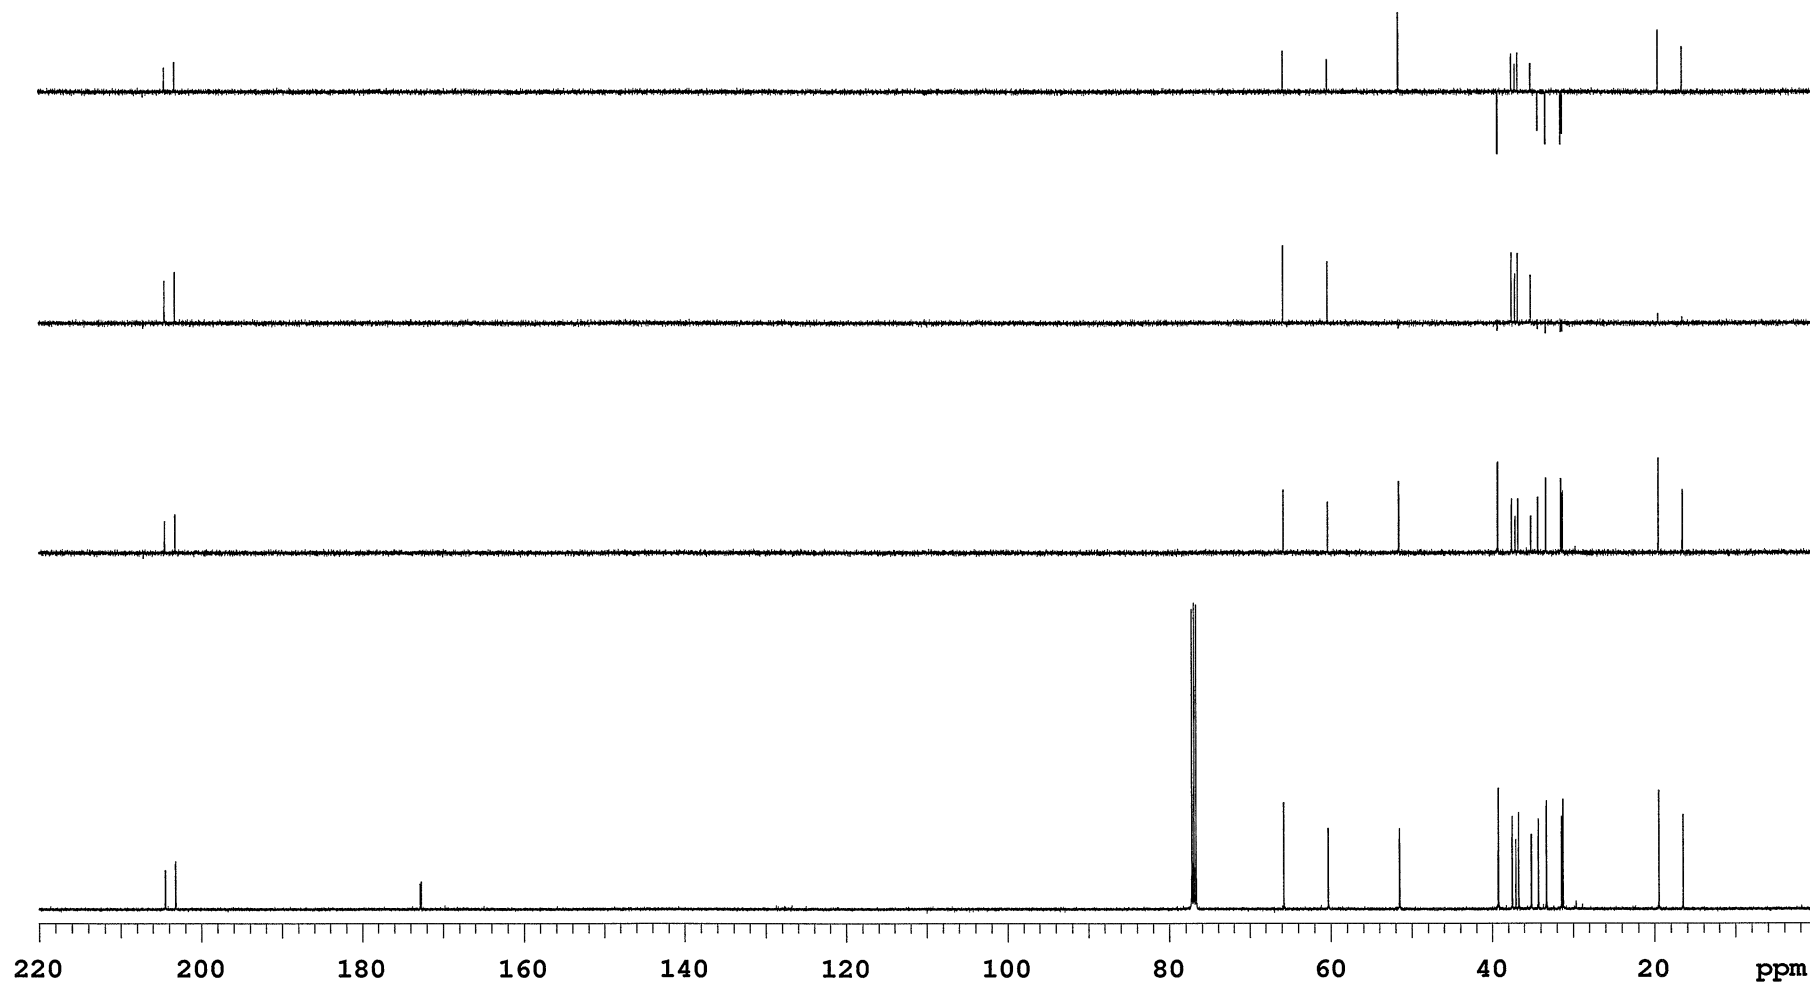

Sample Name RRT-04-090-I  
Date collected 2023-01-06Pulse sequence PROTON  
Solvent cdcl3Temperature 25  
Spectrometer Agilent-NMR-inova500Study owner vnmr2  
Operator vnmr2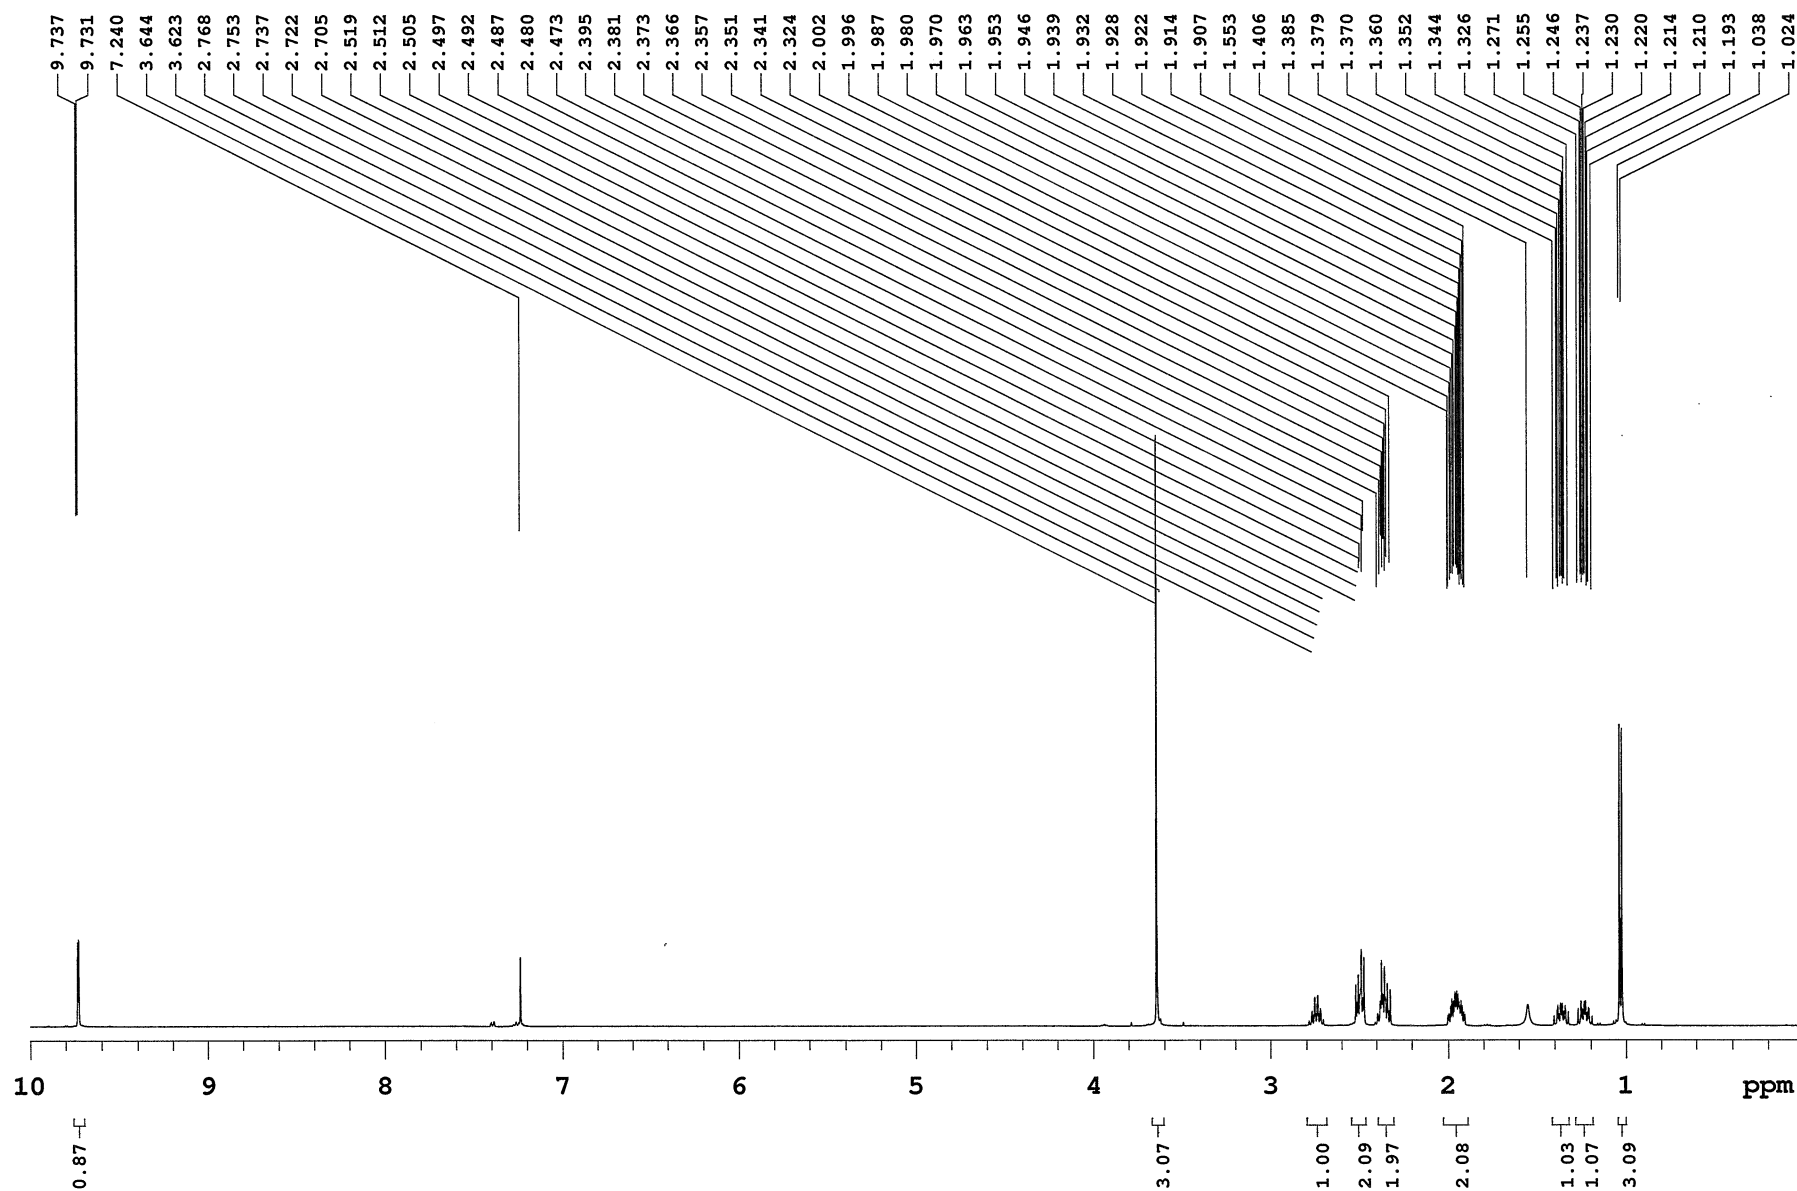

Sample Name RRT-04-090-1  
Date collected 2023-01-06

Pulse sequence CARBON  
Solvent cdcl3

Temperature 25  
Spectrometer Agilent-NMR-inova500

Study owner vnmr2  
Operator vnmr2

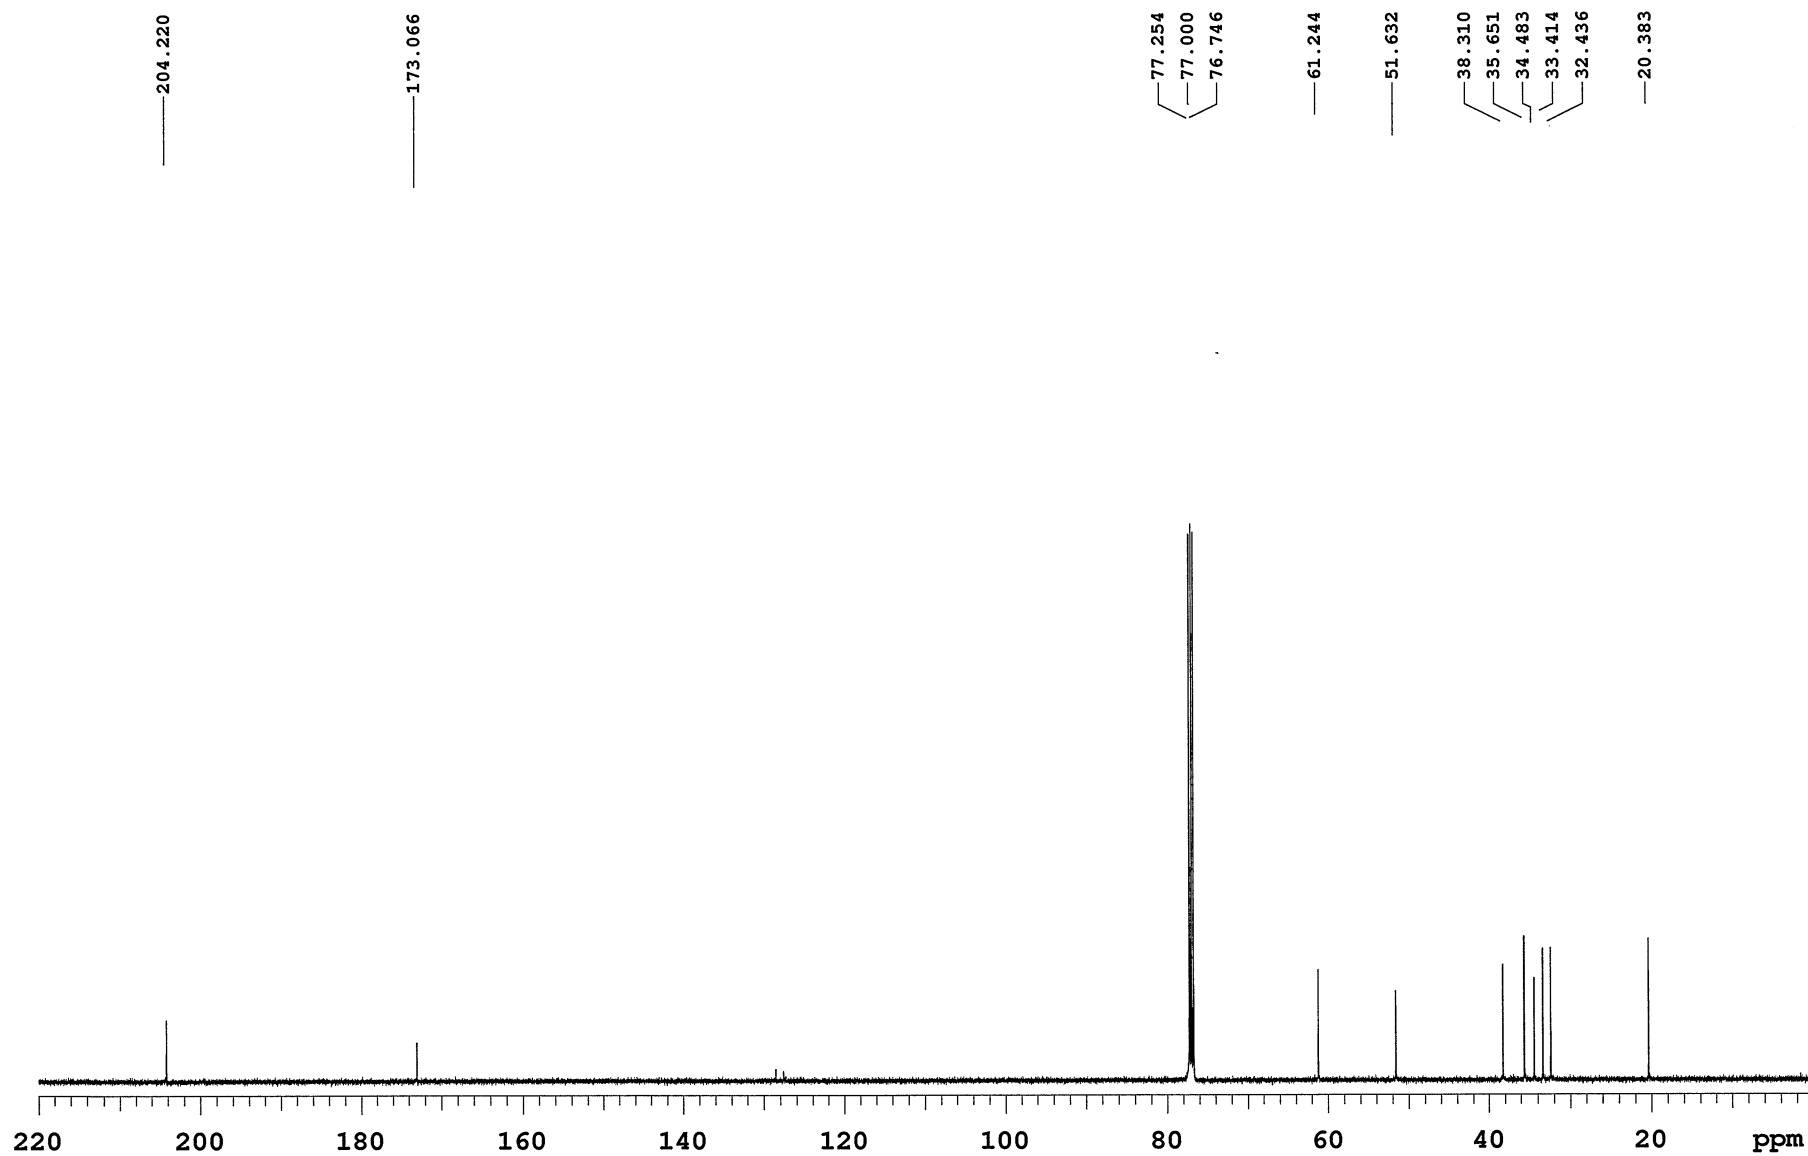

$^{13}\text{C}$  NMR (125 MHz,  $\text{CDCl}_3$ ) of compound 13

Sample Name **RRT-04-090-1**  
Date collected **2023-01-06**

Pulse sequence **DEPT**  
Solvent **cdcl3**

Temperature **25**  
Spectrometer **Agilent-NMR-inova500**

Study owner **vnmr2**  
Operator **vnmr2**

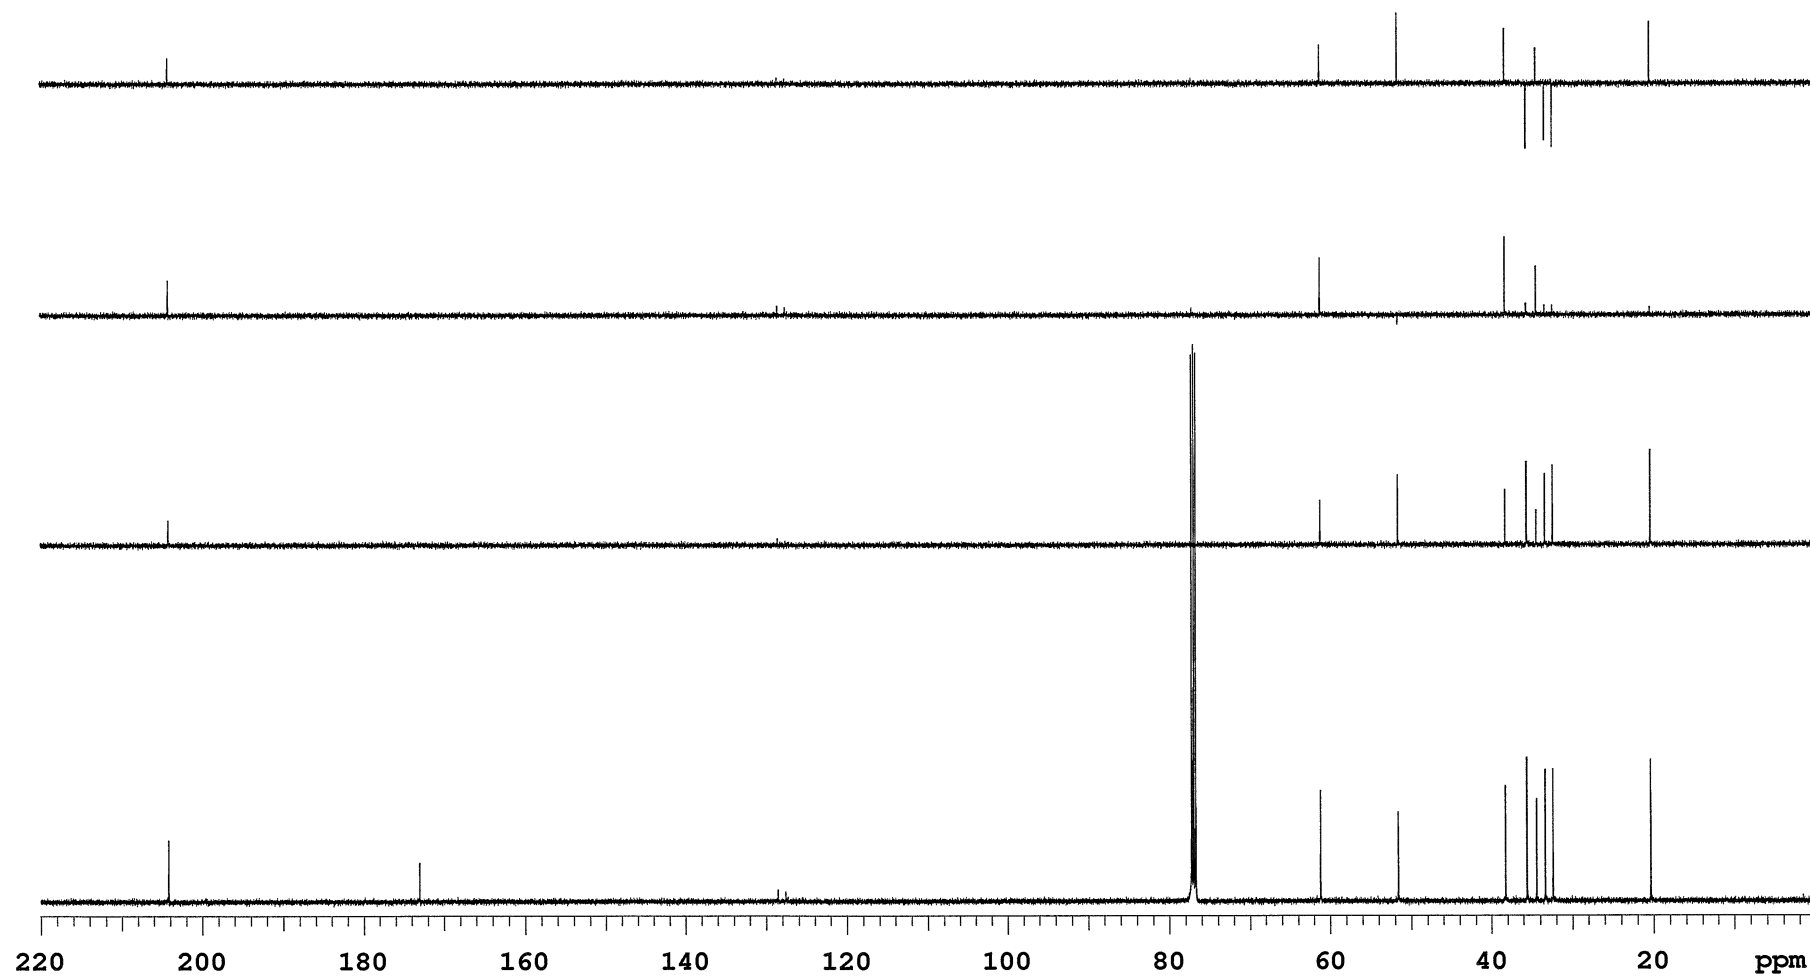

DEPT of compound 13

Sample Name **RRT-04-090-I**  
Date collected **2023-01-07**Pulse sequence **gHSQC**  
Solvent **cdcl3**Temperature **25**  
Spectrometer **Agilent-NMR-inova500**Study owner **vnmr2**  
Operator **vnmr2**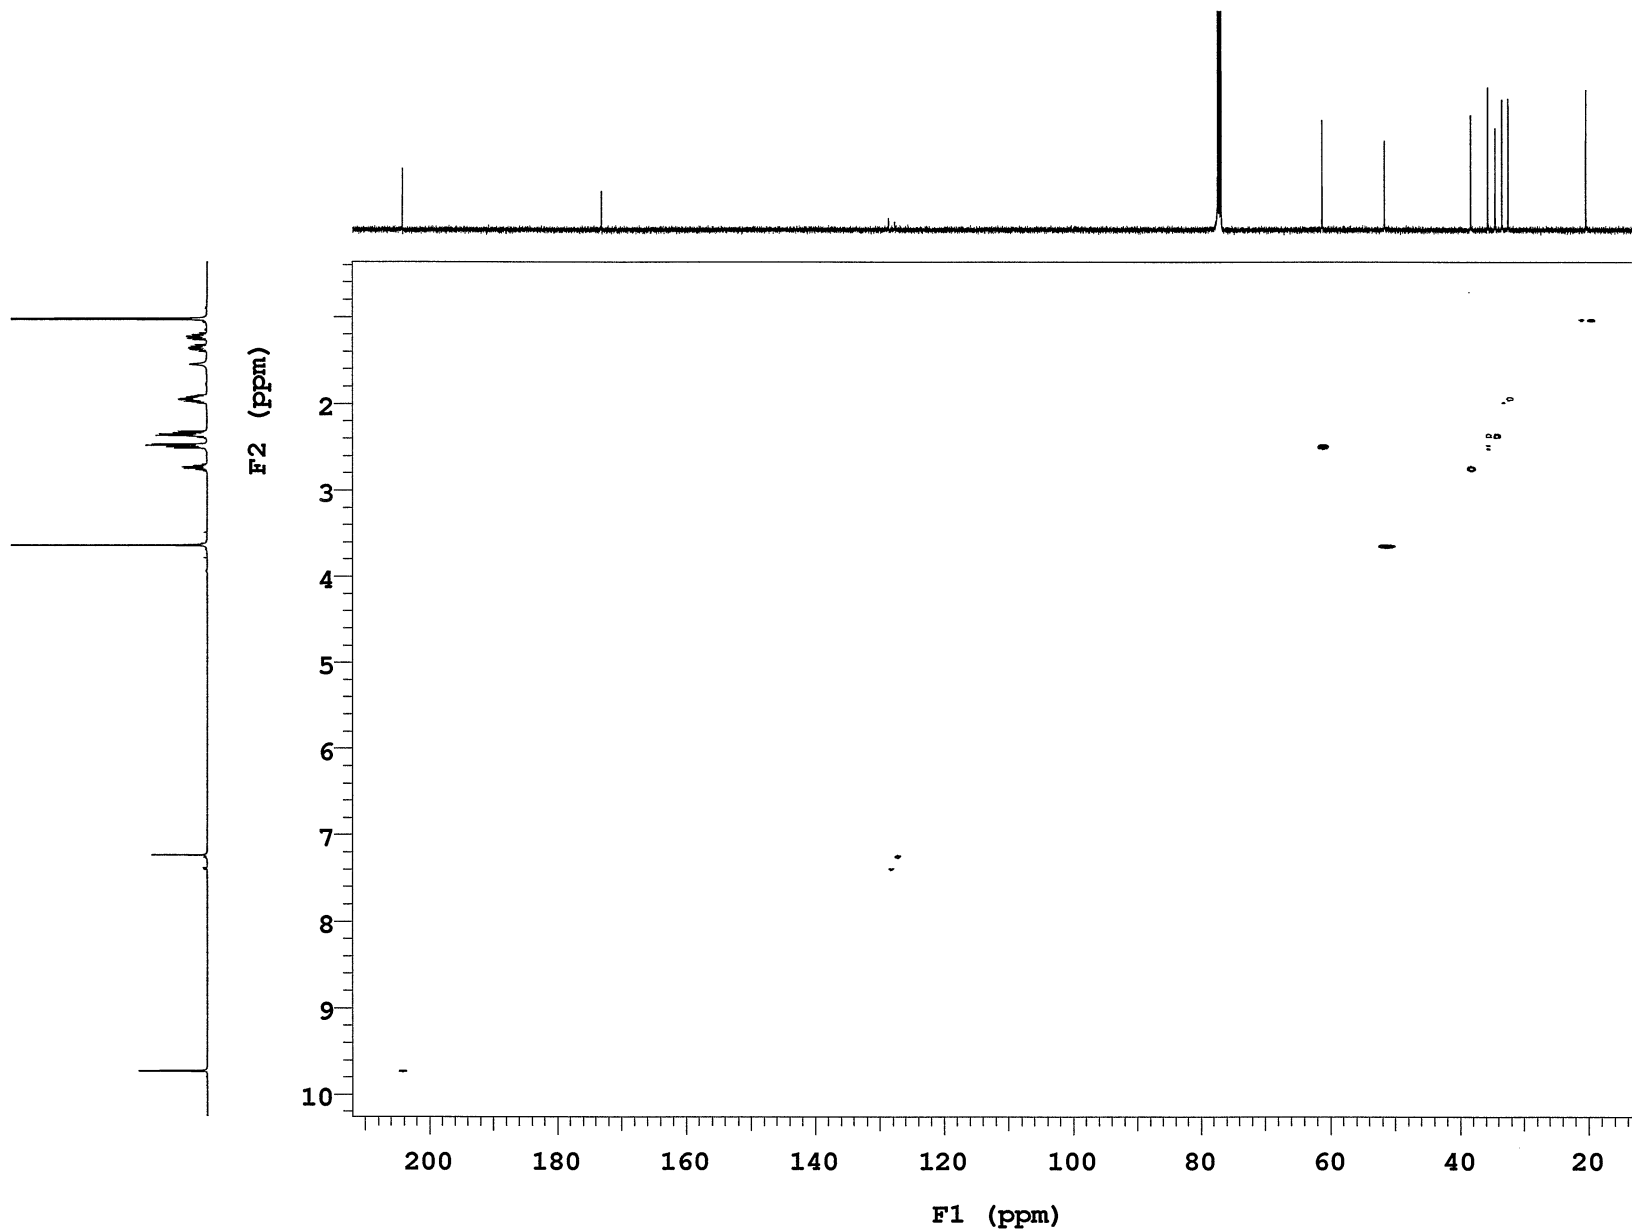

Sample Name RRT-04-090-1  
Date collected 2023-01-07

Pulse sequence gCOSY  
Solvent cdcl3

Temperature 25  
Spectrometer Agilent-NMR-inova500

Study owner vnmr2  
Operator vnmr2

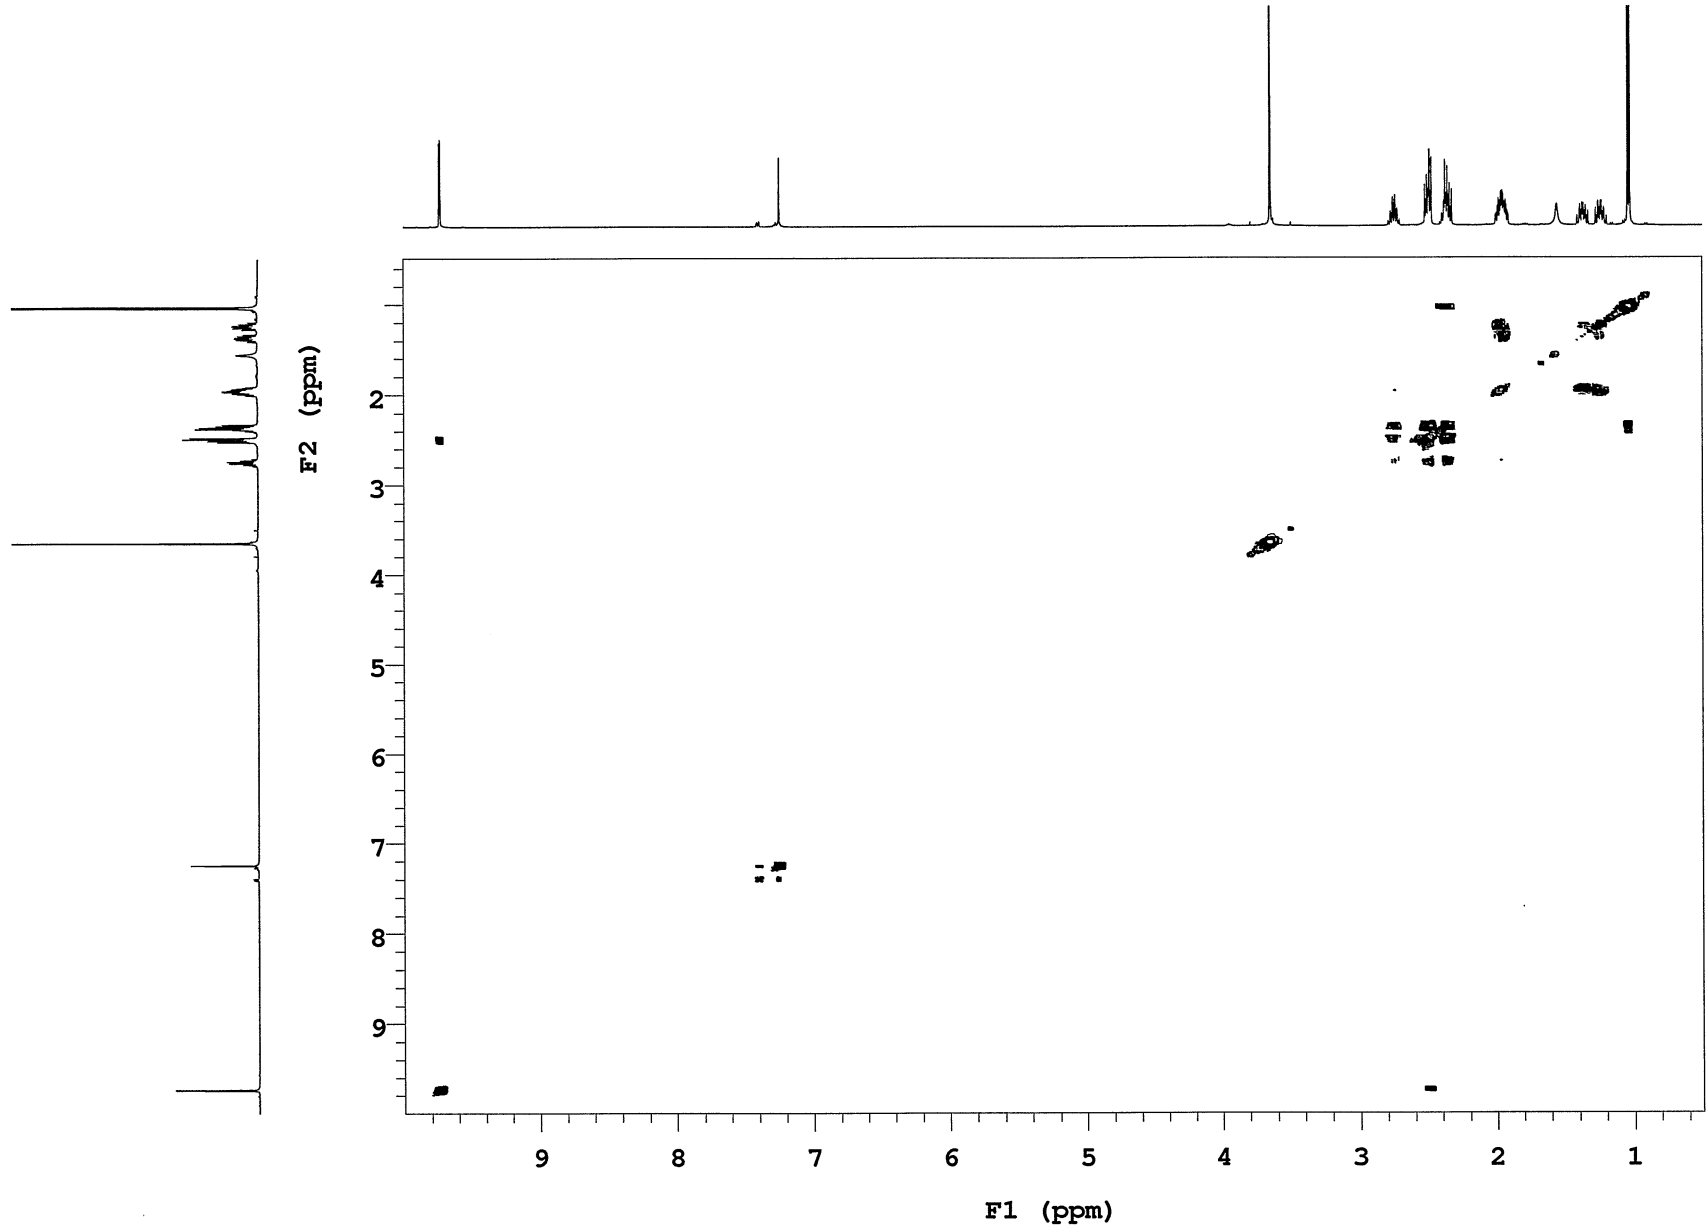

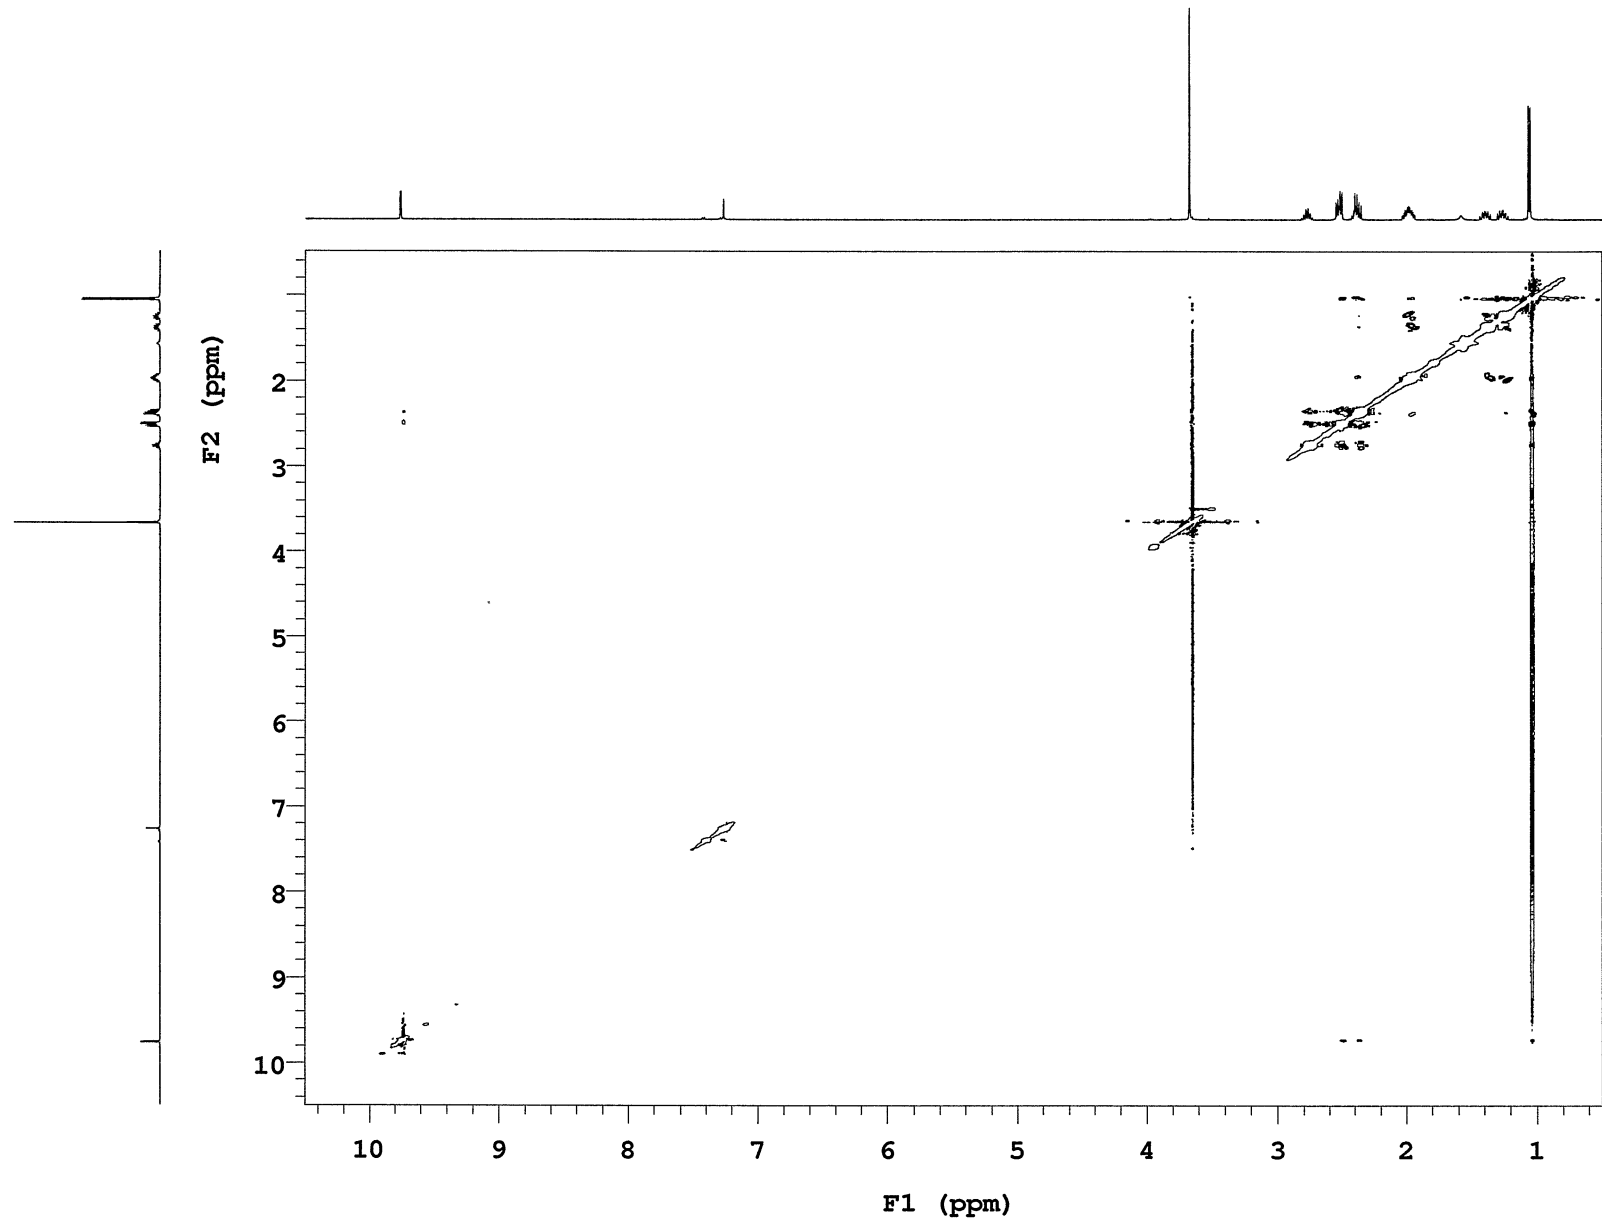

Sample Name **RRT-262-solid**  
Date collected **2023-01-10**Pulse sequence **PROTON**  
Solvent **cdcl3**Temperature **25**  
Spectrometer **Agilent-NMR-inova500**Study owner **vnmr2**  
Operator **vnmr2**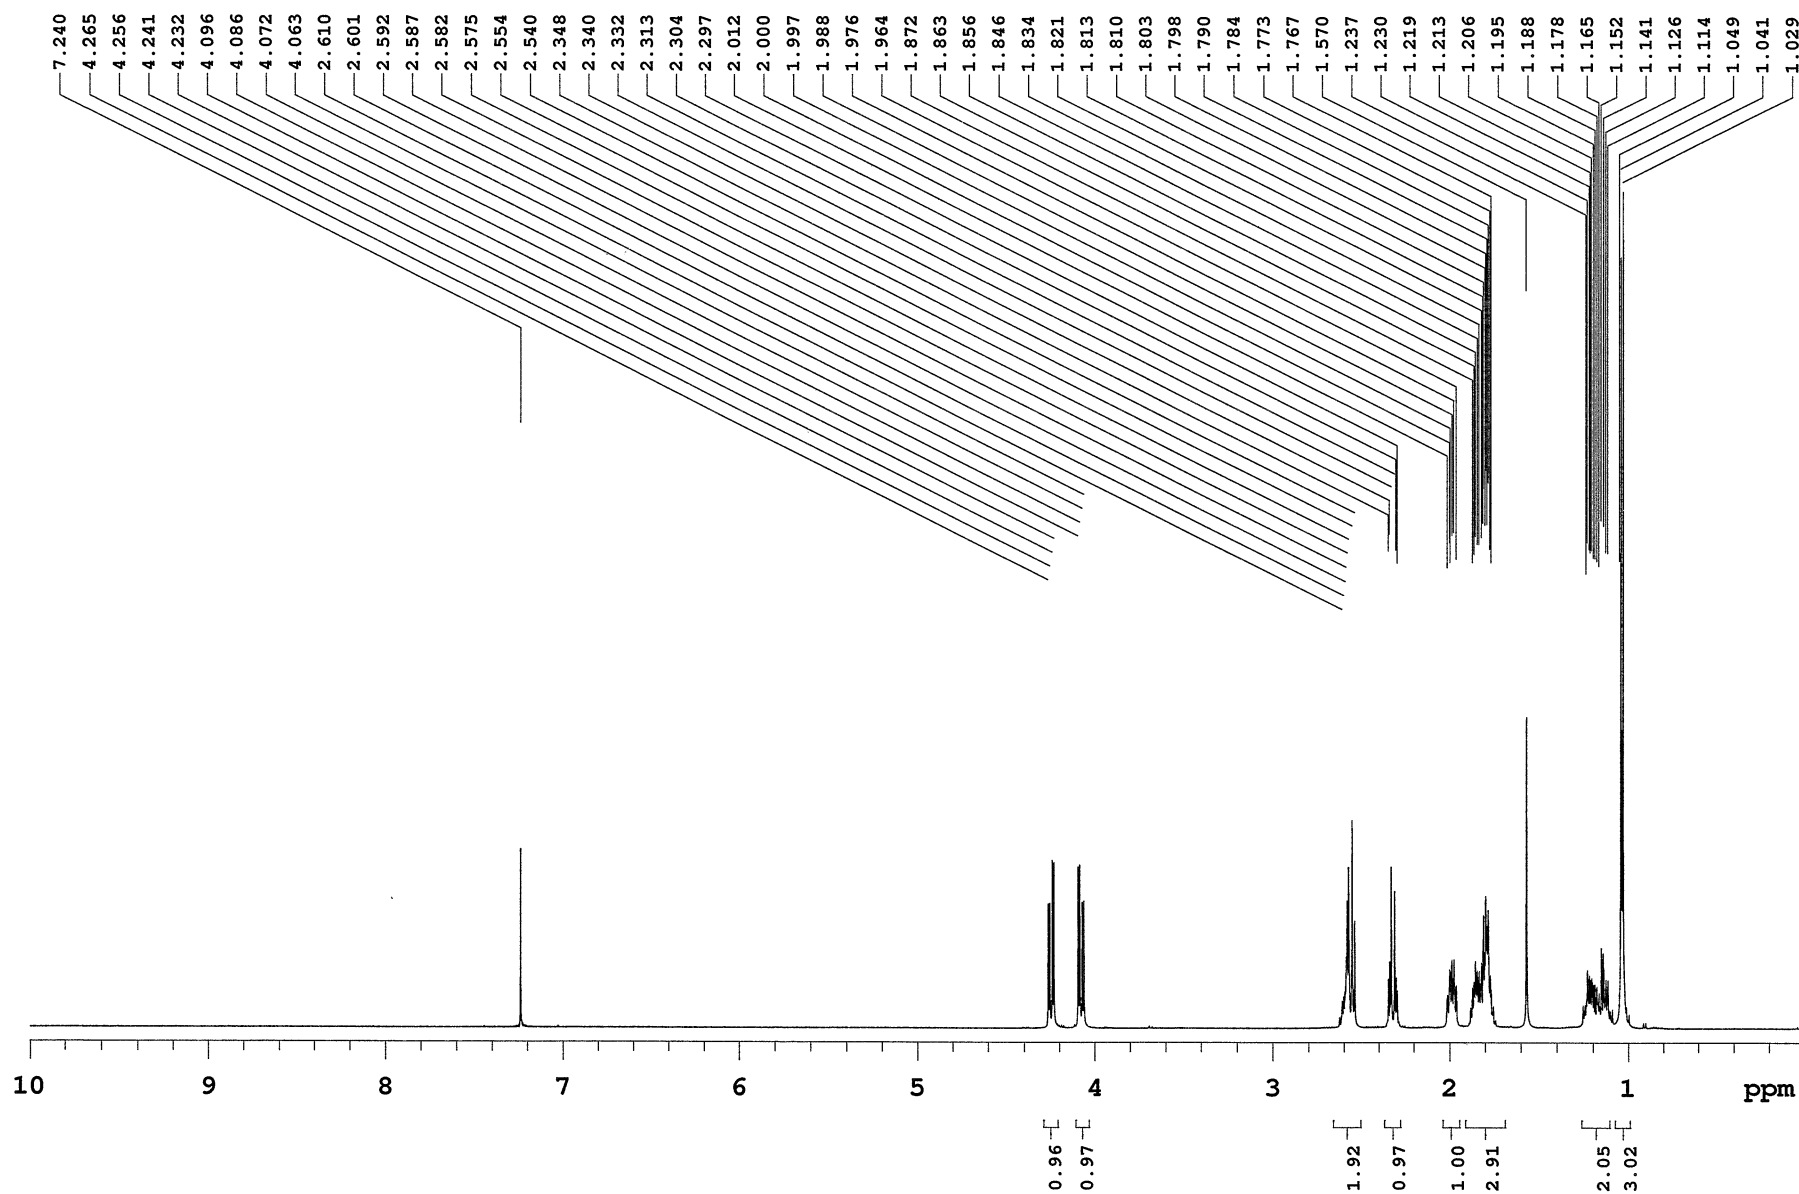



Sample Name **RRT-262-solid**  
Date collected **2023-01-10**

Pulse sequence **CARBON**  
Solvent **cdcl3**

Temperature **25**  
Spectrometer **Agilent-NMR-inova500**

Study owner **vnmr2**  
Operator **vnmr2**

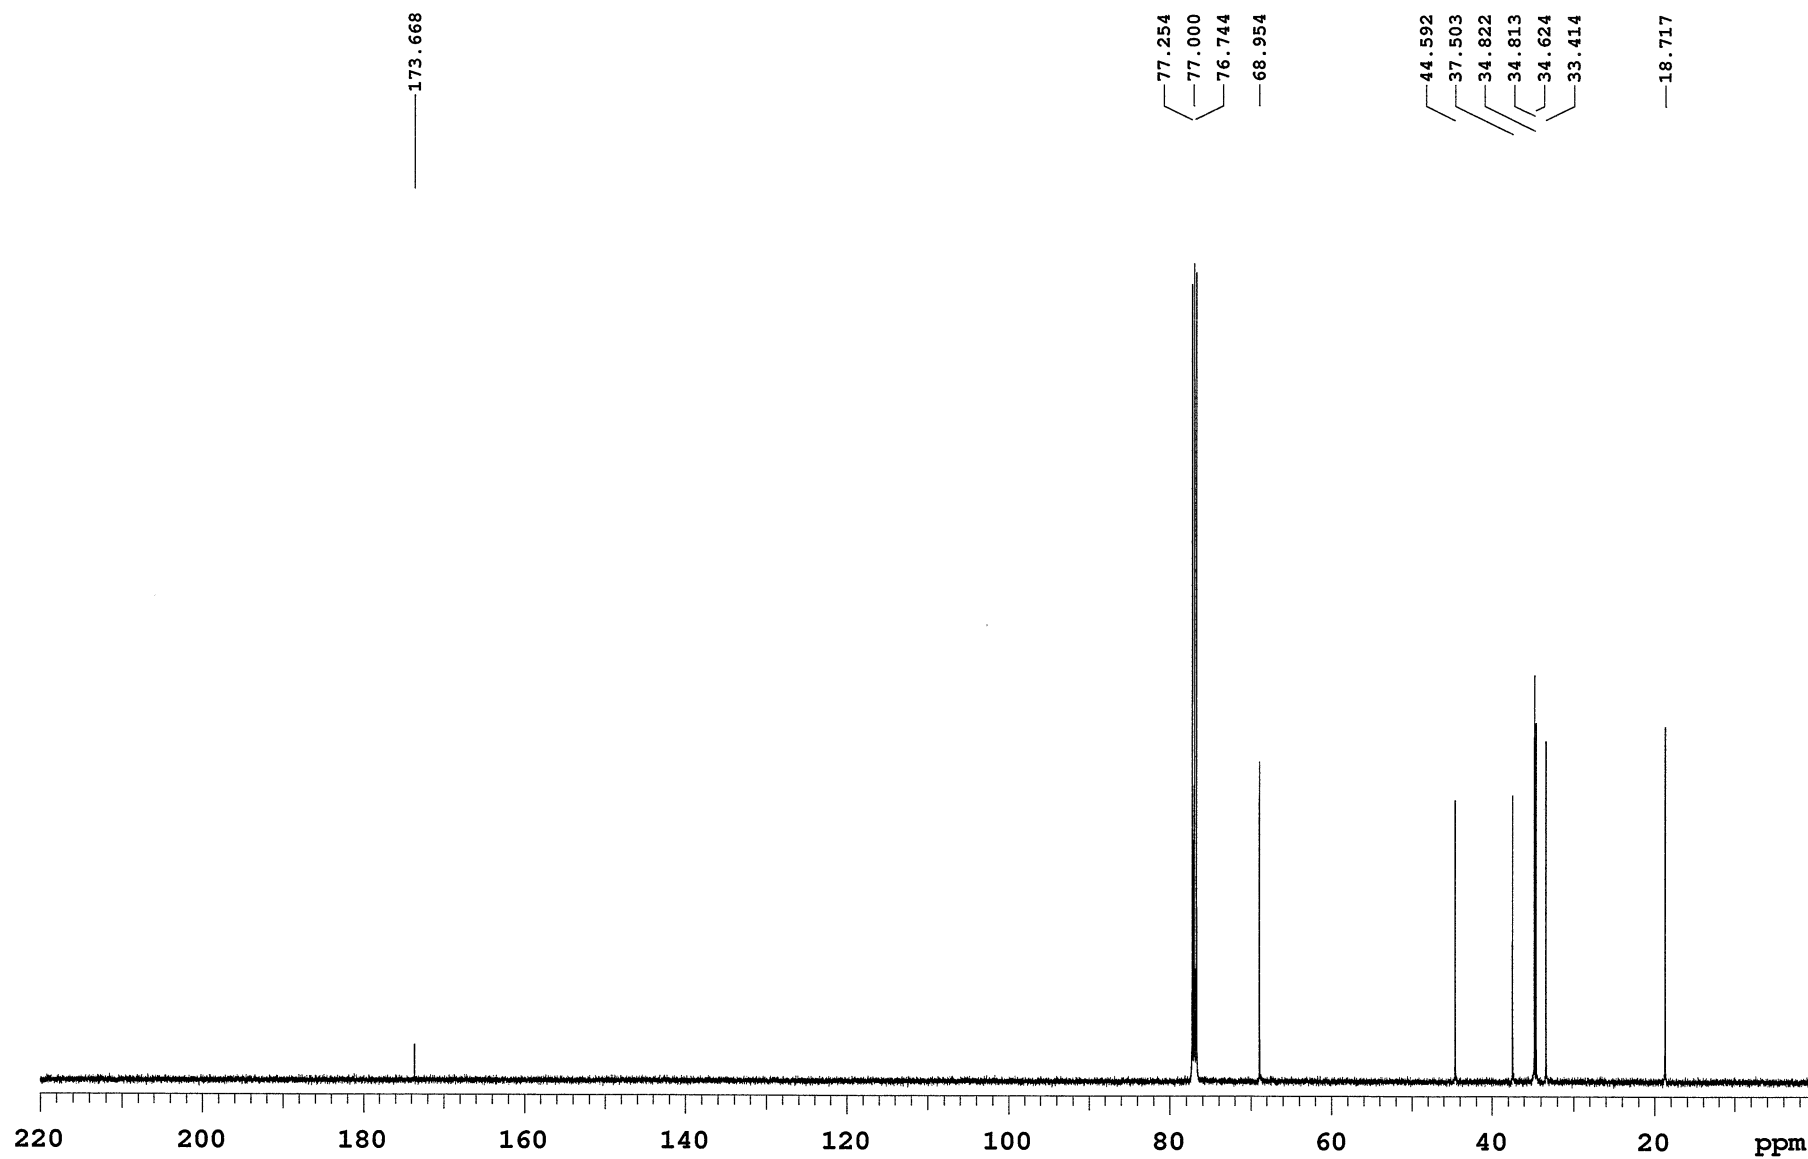

$^{13}\text{C}$  NMR (125 MHz,  $\text{CDCl}_3$ ) of compound 14

|                |               |                |       |              |                      |             |       |
|----------------|---------------|----------------|-------|--------------|----------------------|-------------|-------|
| Sample Name    | RRT-262-solid | Pulse sequence | DEPT  | Temperature  | 25                   | Study owner | vnmr2 |
| Date collected | 2023-01-10    | Solvent        | cdcl3 | Spectrometer | Agilent-NMR-inova500 | Operator    | vnmr2 |

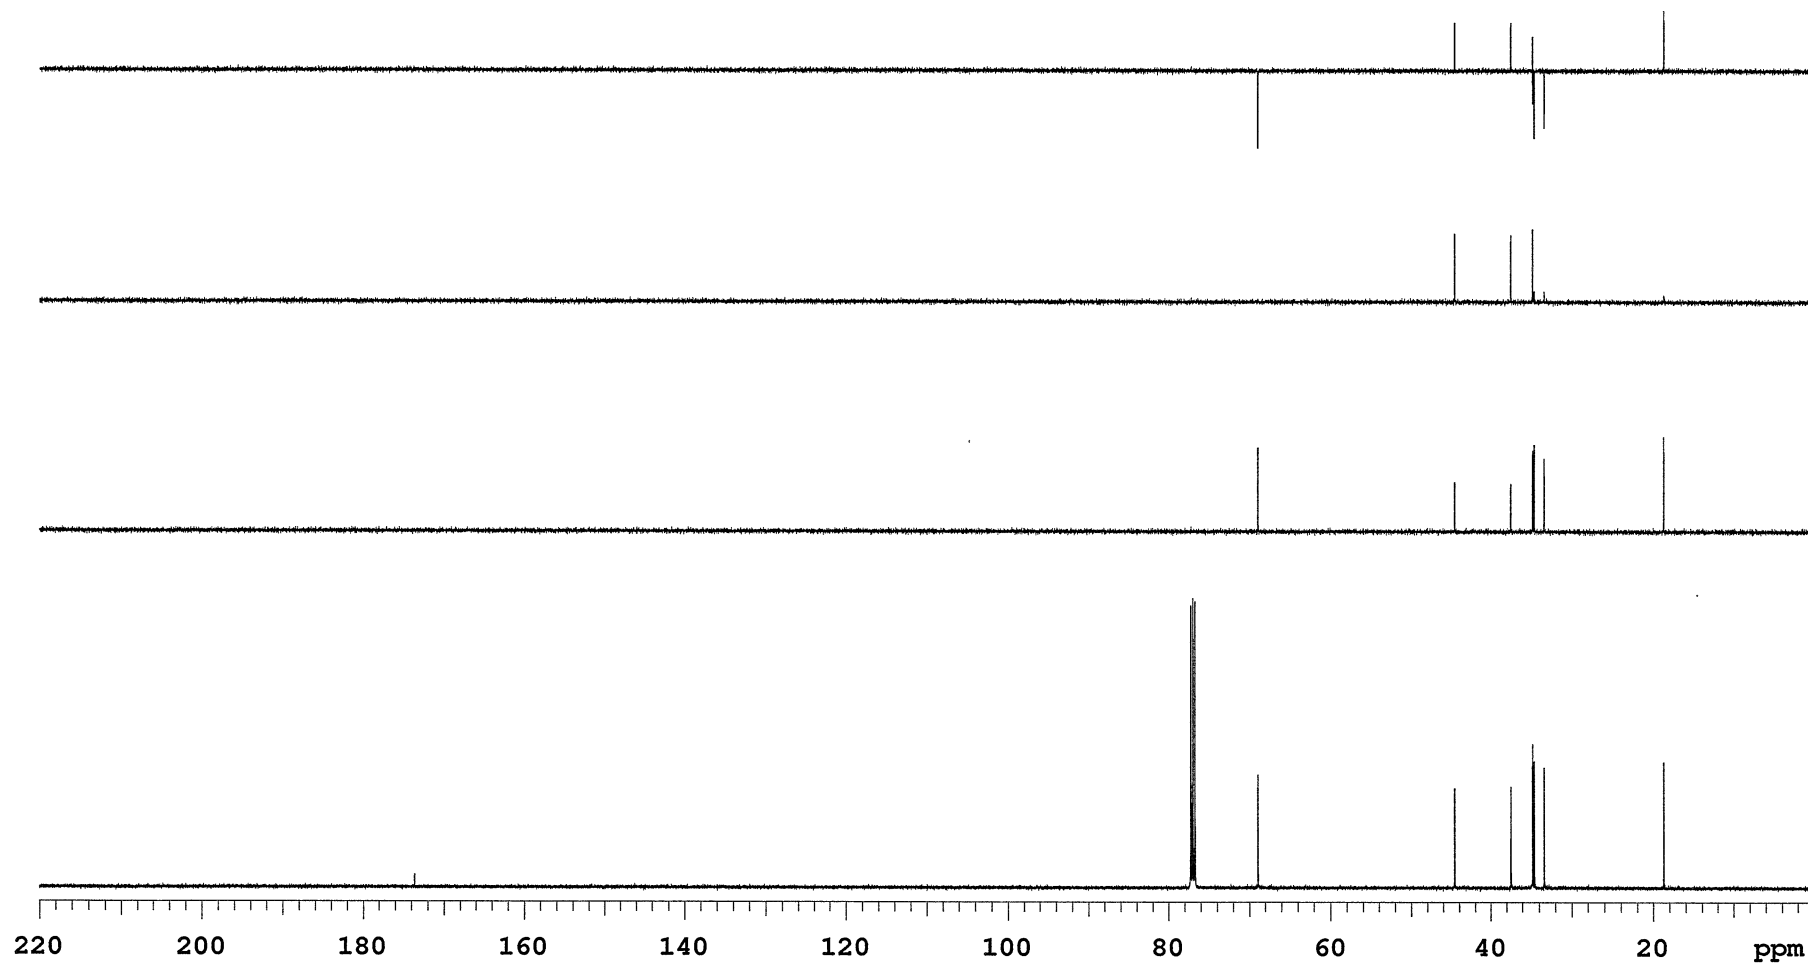

DEPT of compound 14

Sample Name **RRT-262-solid**  
Date collected **2023-01-11**

Pulse sequence **gHSQC**  
Solvent **cdcl3**

Temperature **25**  
Spectrometer **Agilent-NMR-inova500**

Study owner **vnmr2**  
Operator **vnmr2**

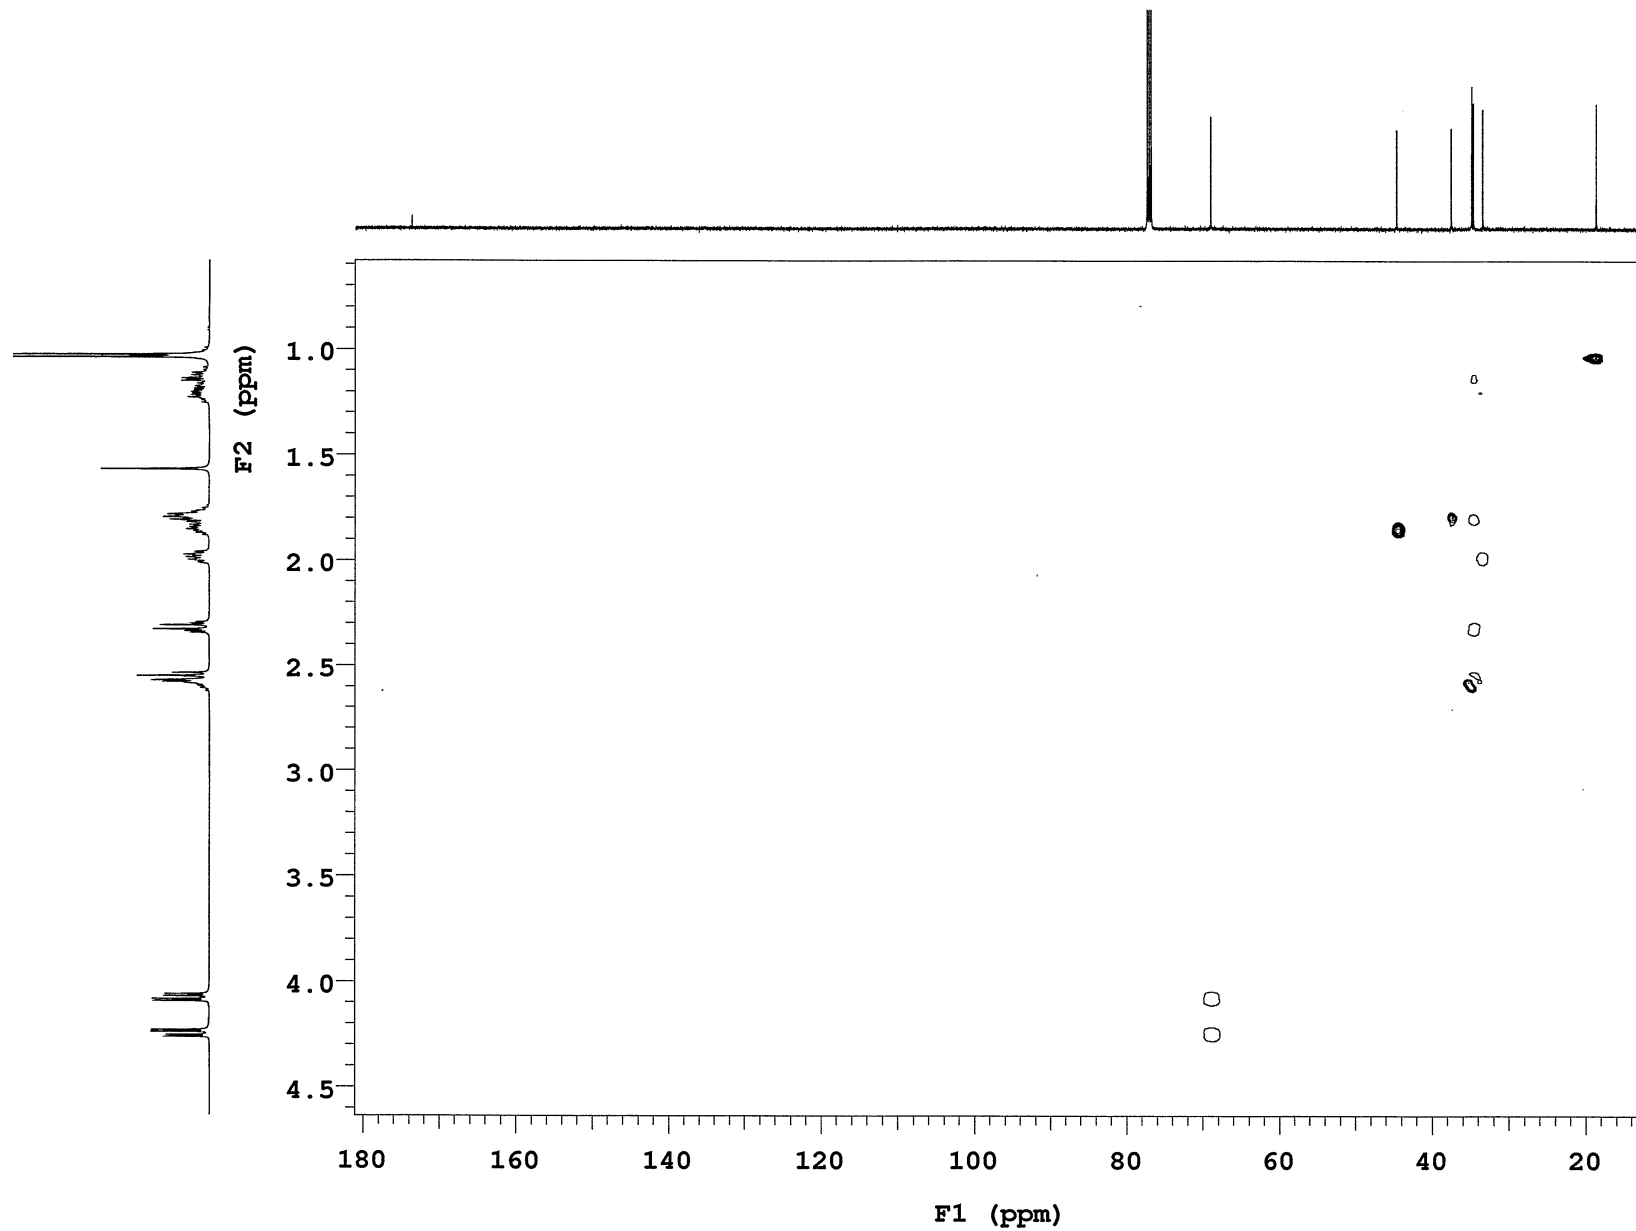

HSQC of compound 14

Sample Name **RRT-262-solid**  
Date collected **2023-01-11**

Pulse sequence **gCOSY**  
Solvent **cdcl3**

Temperature **25**  
Spectrometer **Agilent-NMR-inova500**

Study owner **vnmr2**  
Operator **vnmr2**

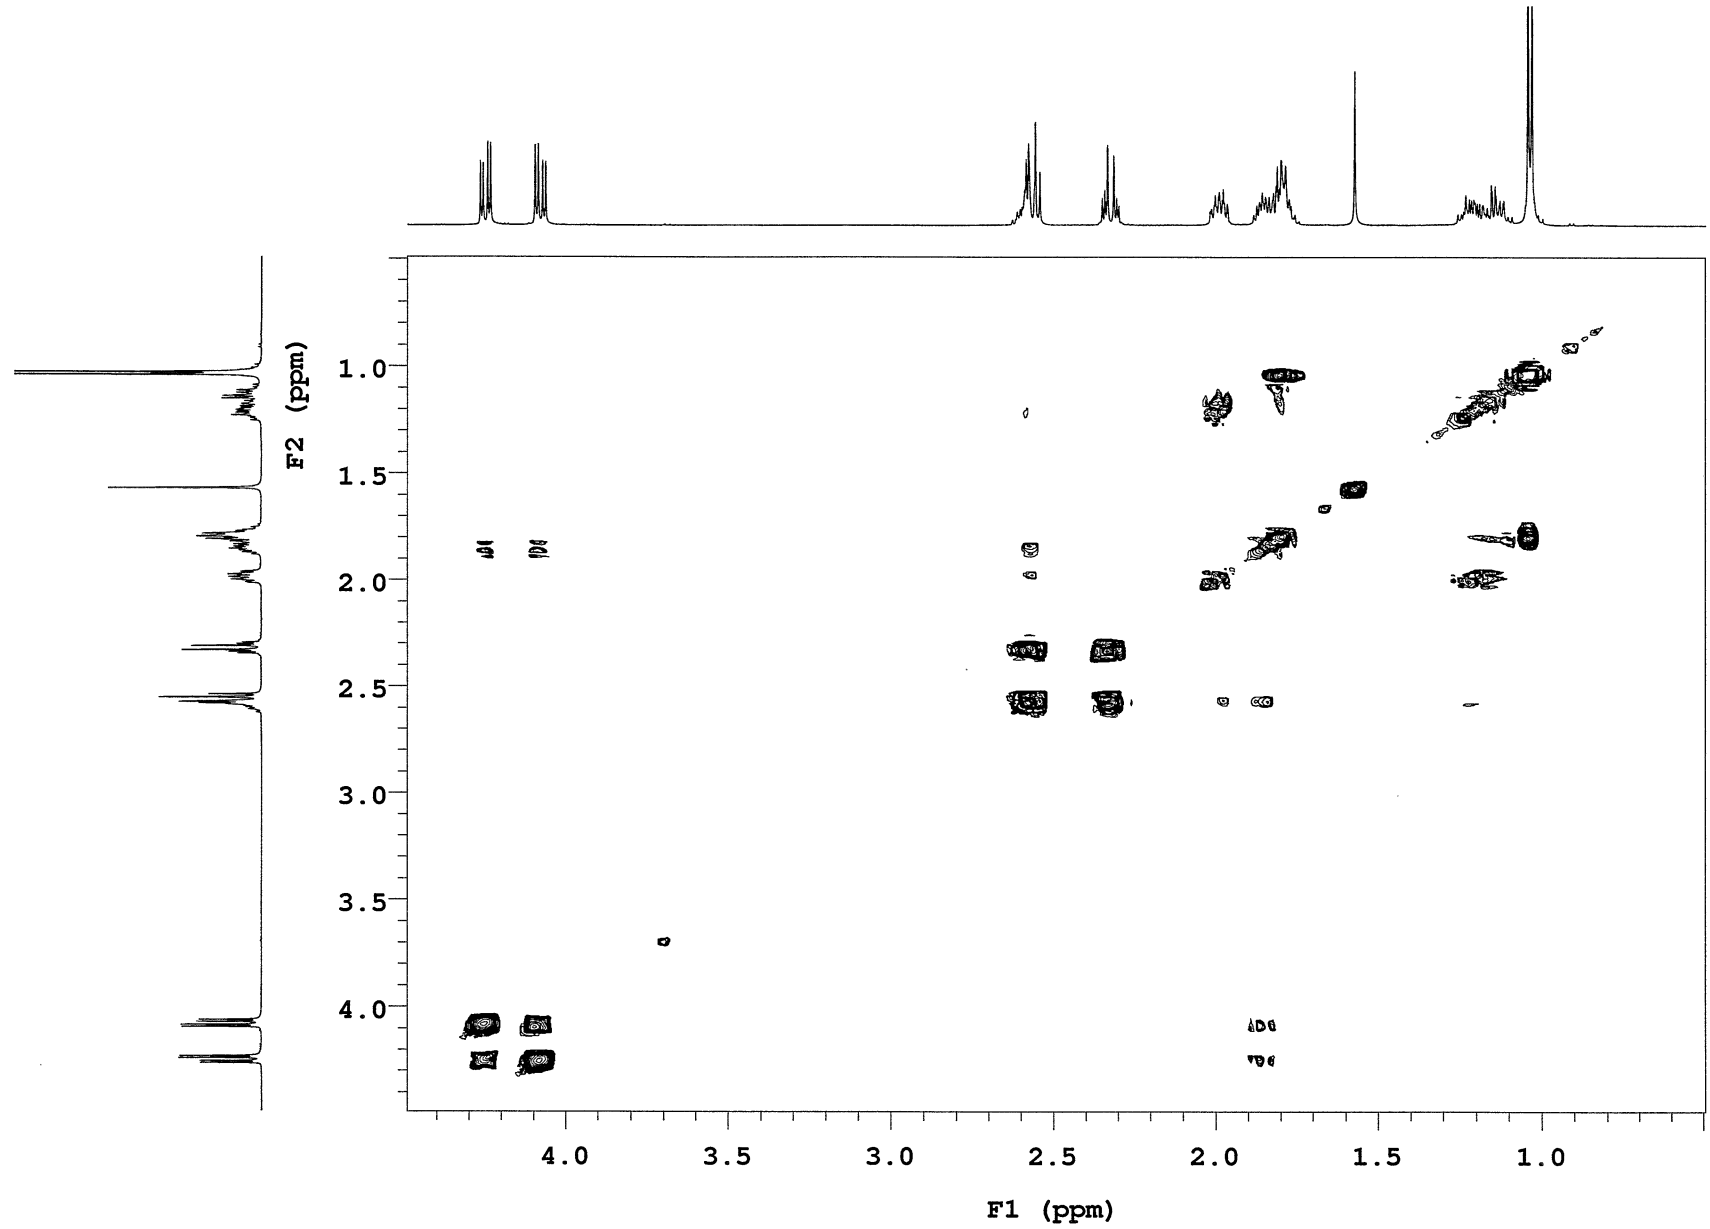

COSY of compound 14

Sample Name **RRT-262-solid**  
Date collected **2023-01-11**

Pulse sequence **NOESY**  
Solvent **cdcl3**

Temperature **25**  
Spectrometer **Agilent-NMR-inova500**

Study owner **vnmr2**  
Operator **vnmr2**

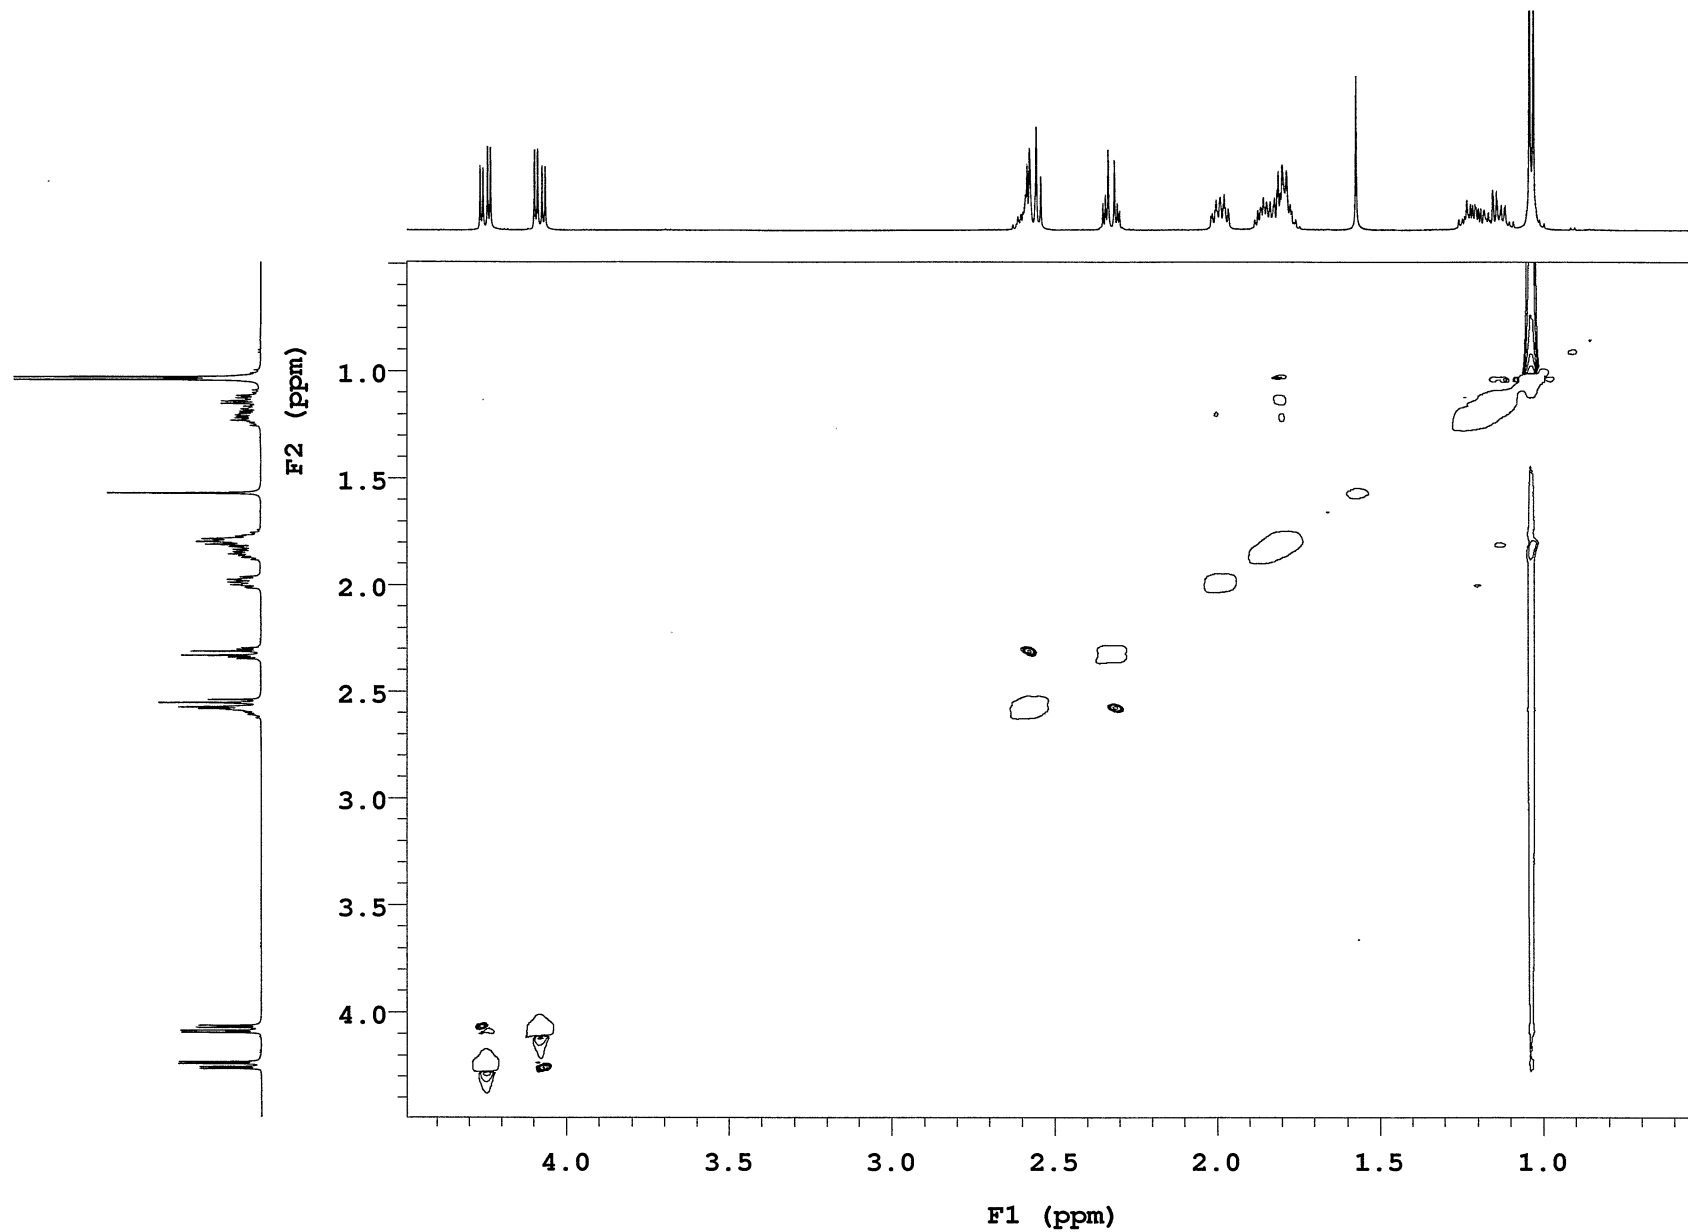

NOESY of compound 14

Sample Name **RRT-265**  
Date collected **2023-01-13**

Pulse sequence **PROTON**  
Solvent **cdcl3**

Temperature **25**  
Spectrometer **Agilent-NMR-inova500**

Study owner **vnmr2**  
Operator **vnmr2**

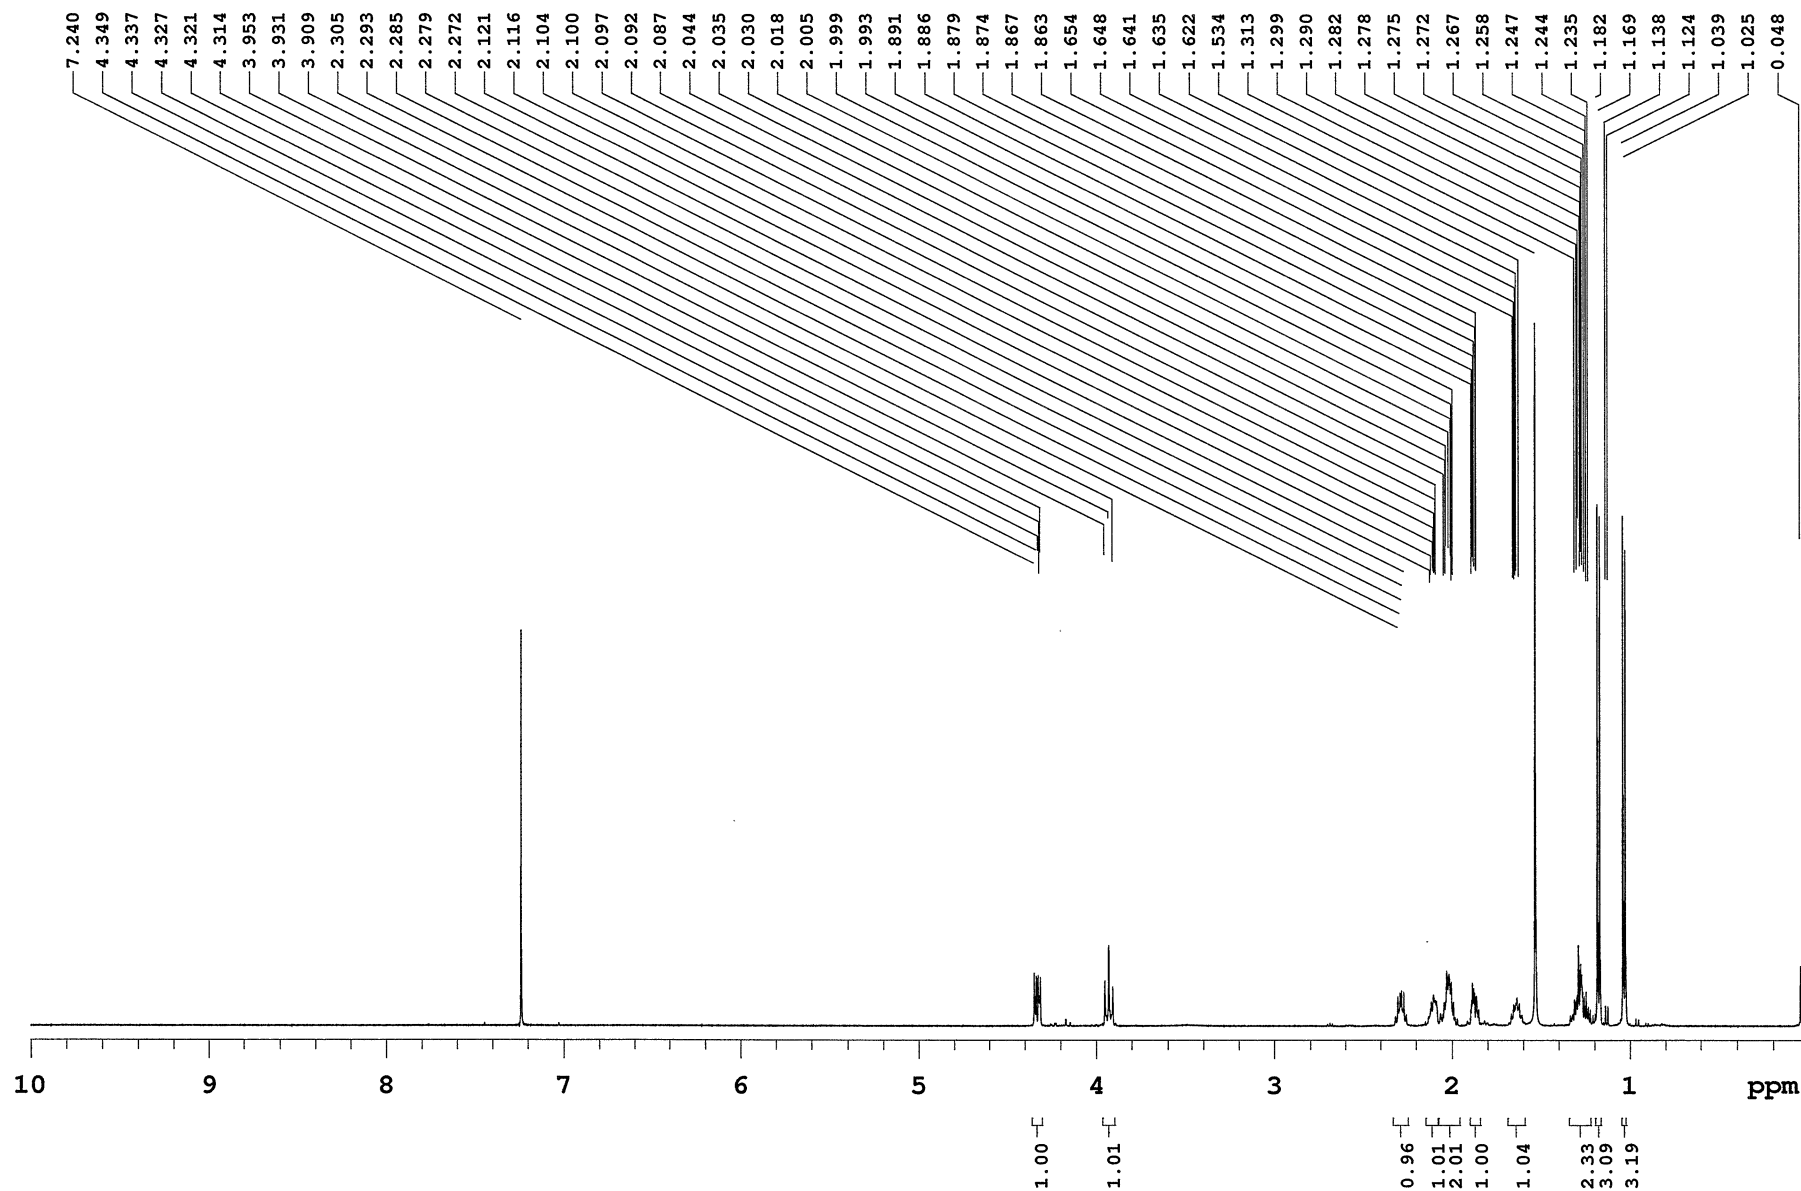

Sample Name **RRT-265**  
Date collected **2023-01-13**

Pulse sequence **CARBON**  
Solvent **cdcl3**

Temperature **25**  
Spectrometer **Agilent-NMR-inova500**

Study owner **vnmr2**  
Operator **vnmr2**

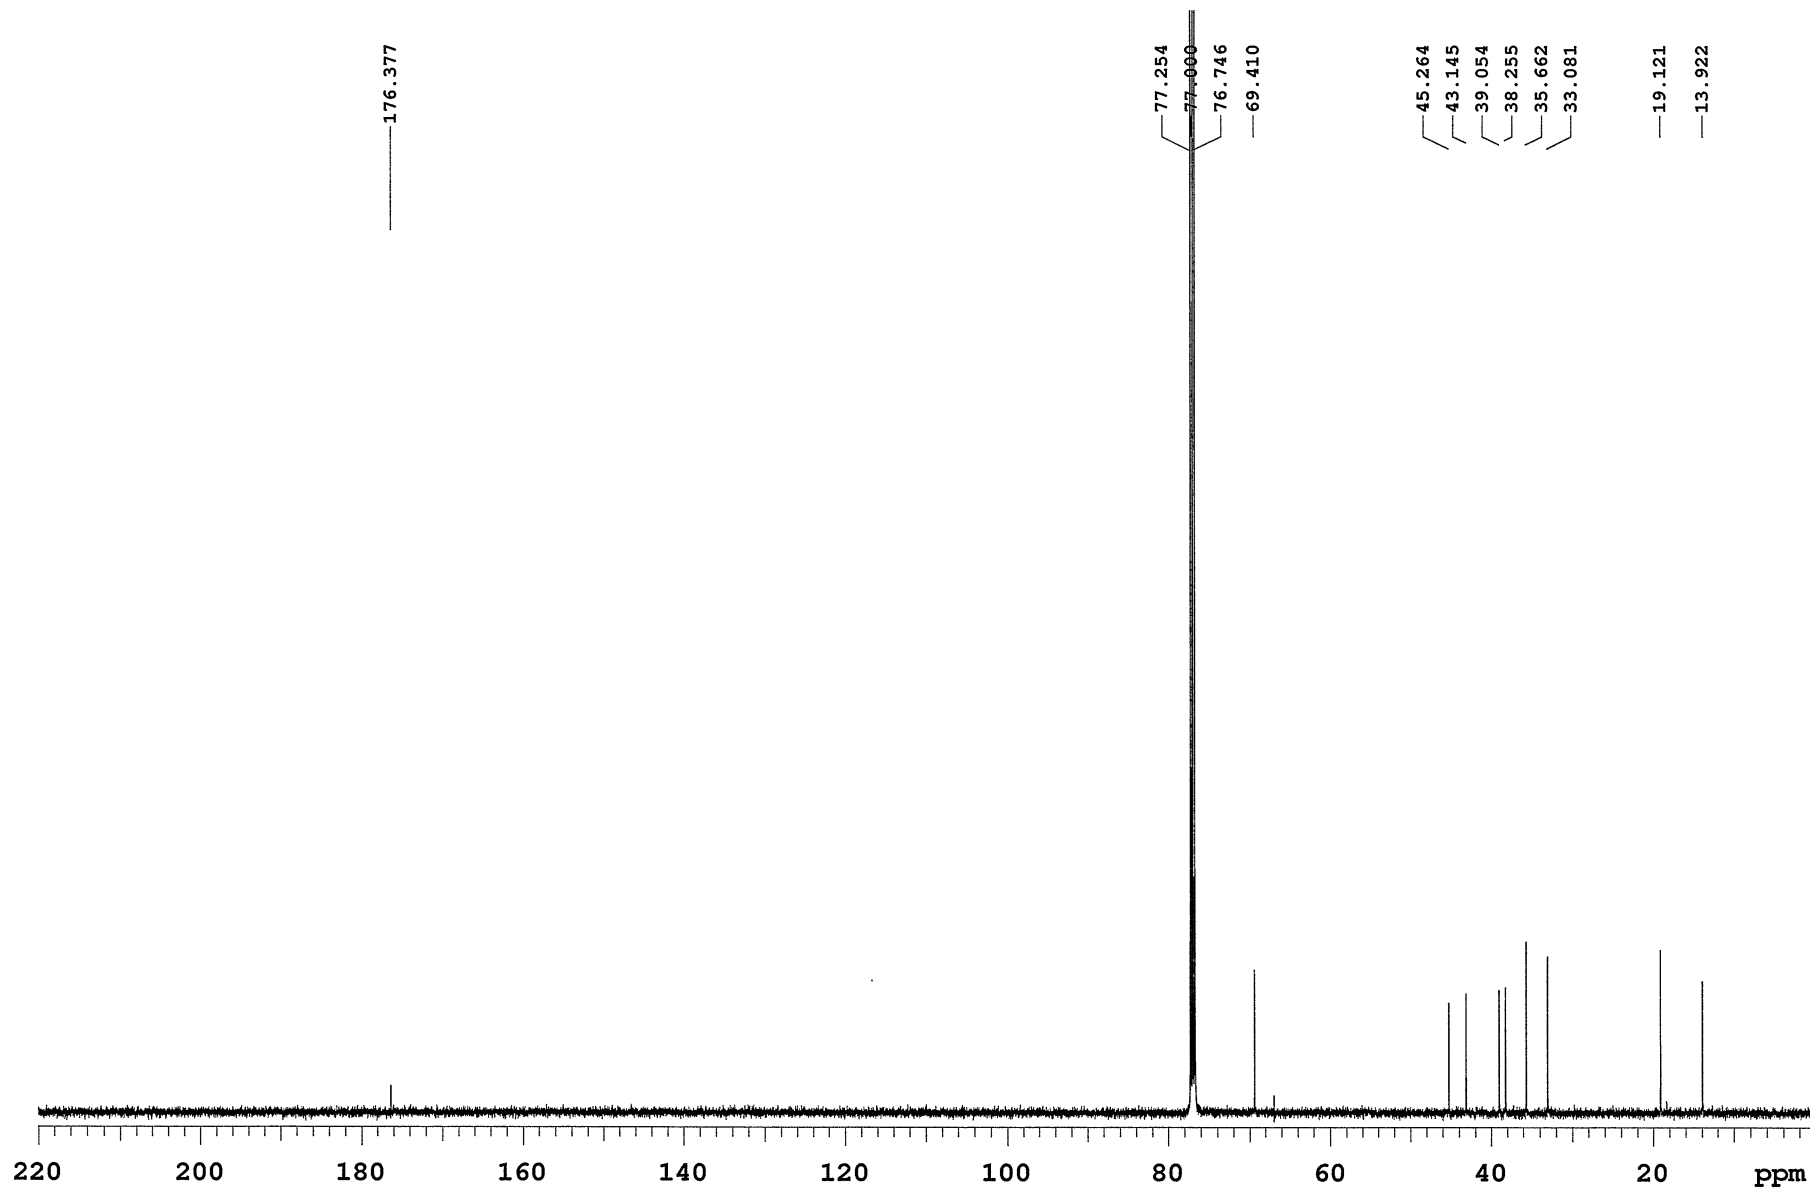

$^{13}\text{C}$  NMR (125 MHz,  $\text{CDCl}_3$ ) of compound 15

Sample Name **RRT-265**  
Date collected **2023-01-13**

Pulse sequence **DEPT**  
Solvent **cdcl3**

Temperature **25**  
Spectrometer **Agilent-NMR-inova500**

Study owner **vnmr2**  
Operator **vnmr2**

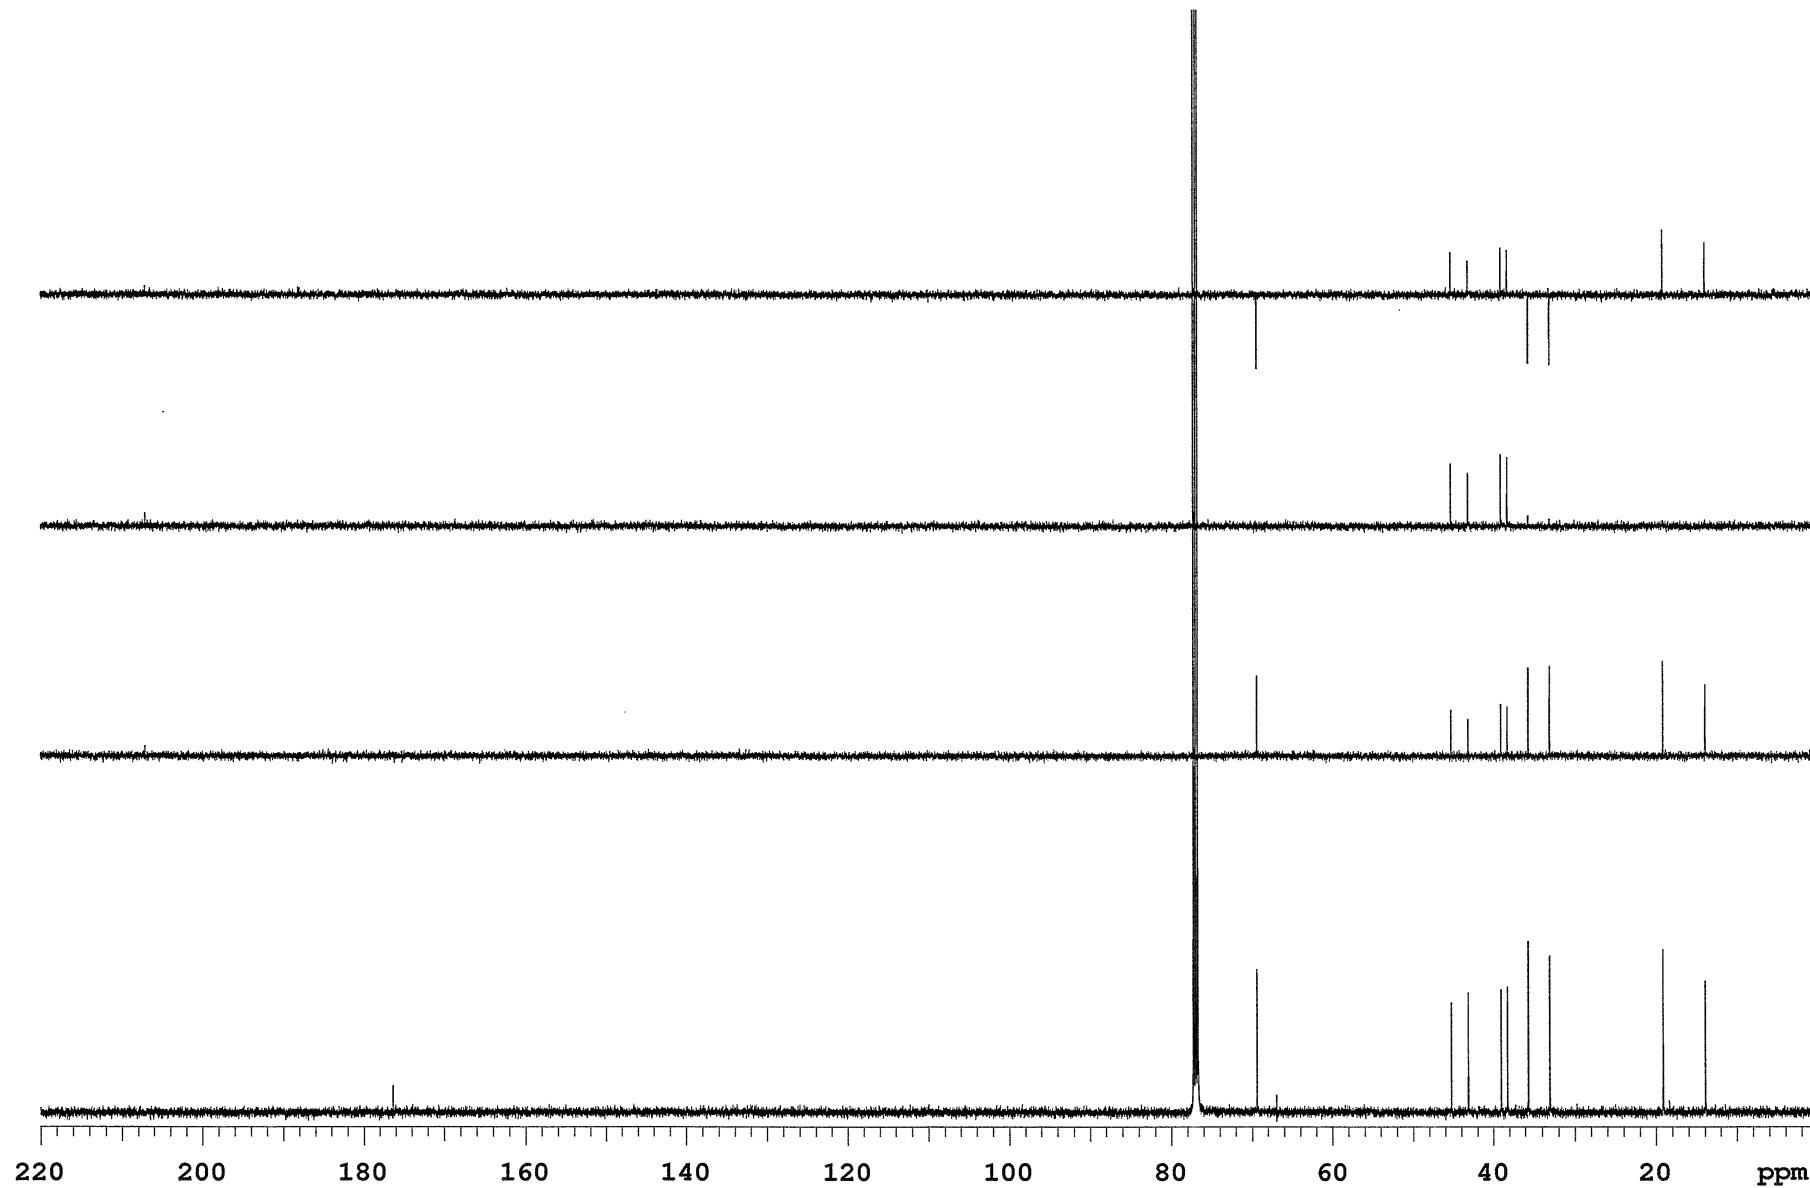

DEPT of compound 15



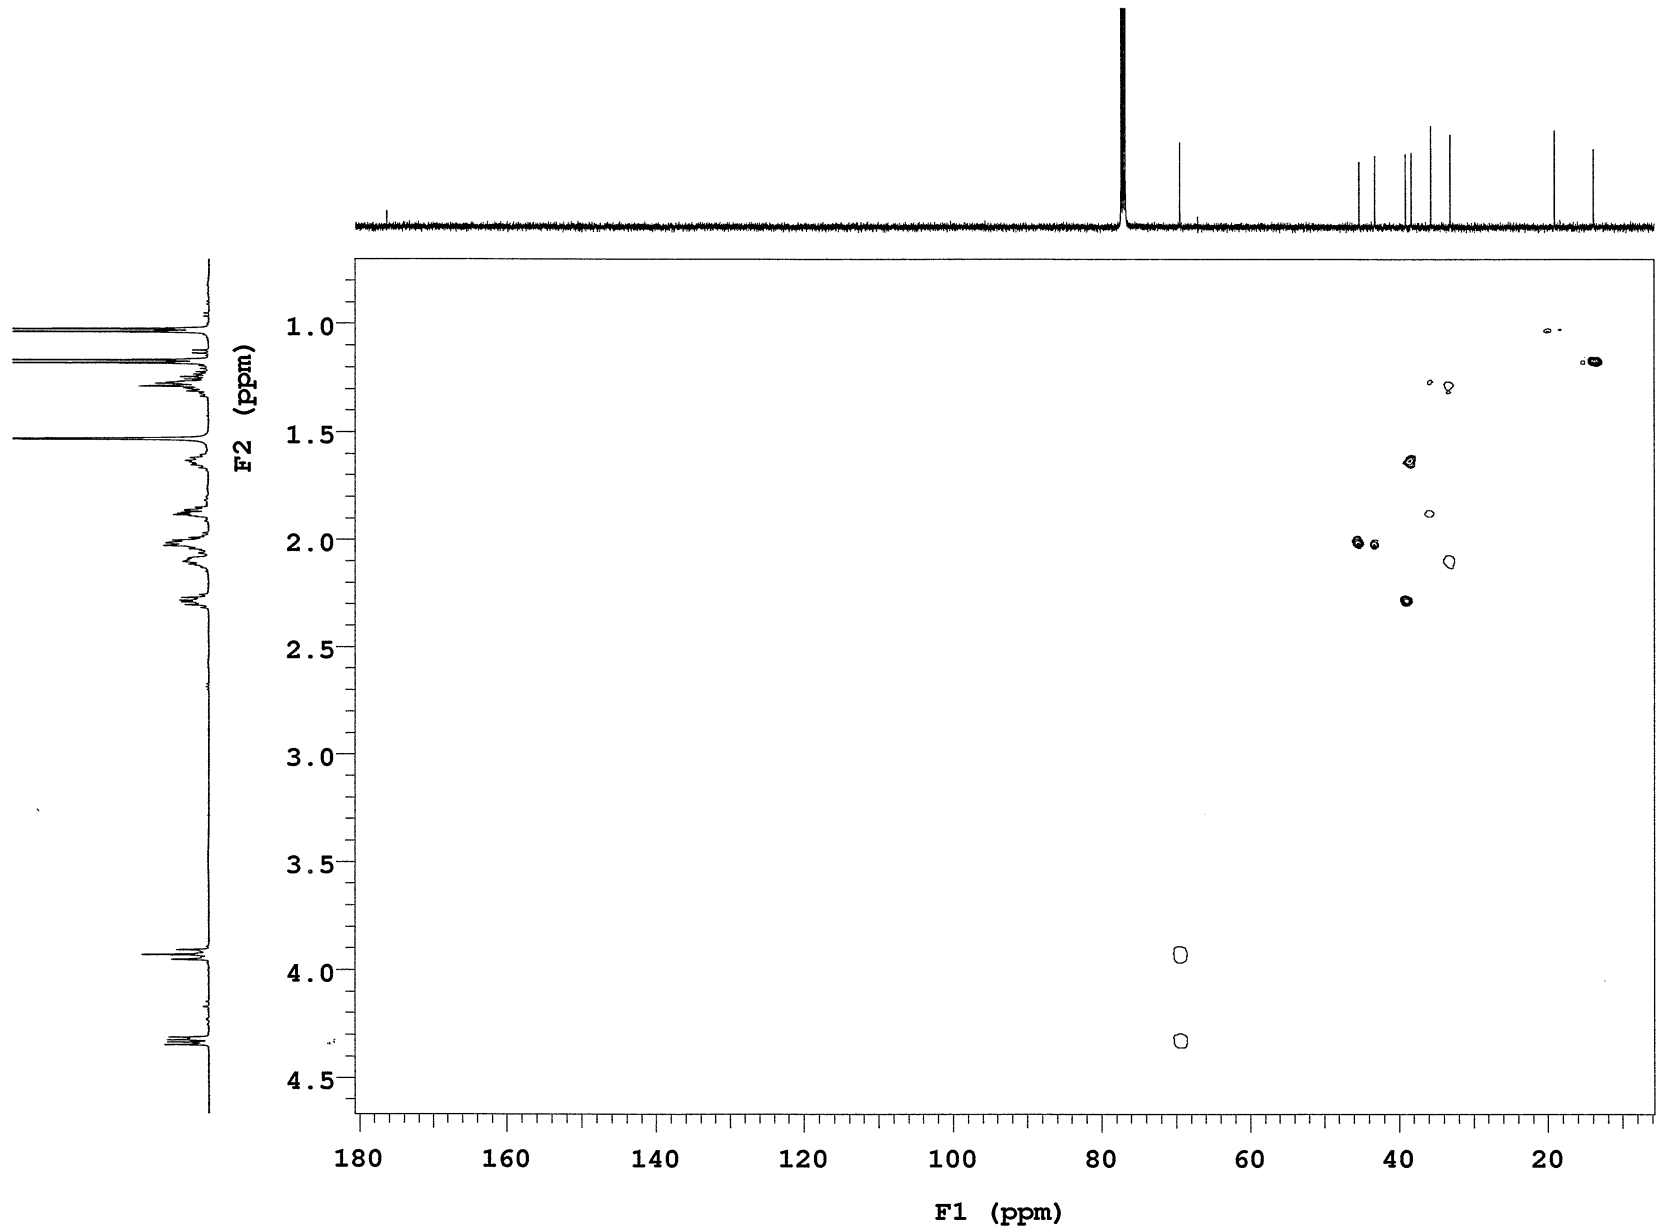

Sample Name RRT-265  
Date collected 2023-01-14

Pulse sequence gCOSY  
Solvent cdcl3

Temperature 25  
Spectrometer Agilent-NMR-inova500

Study owner vnmr2  
Operator vnmr2

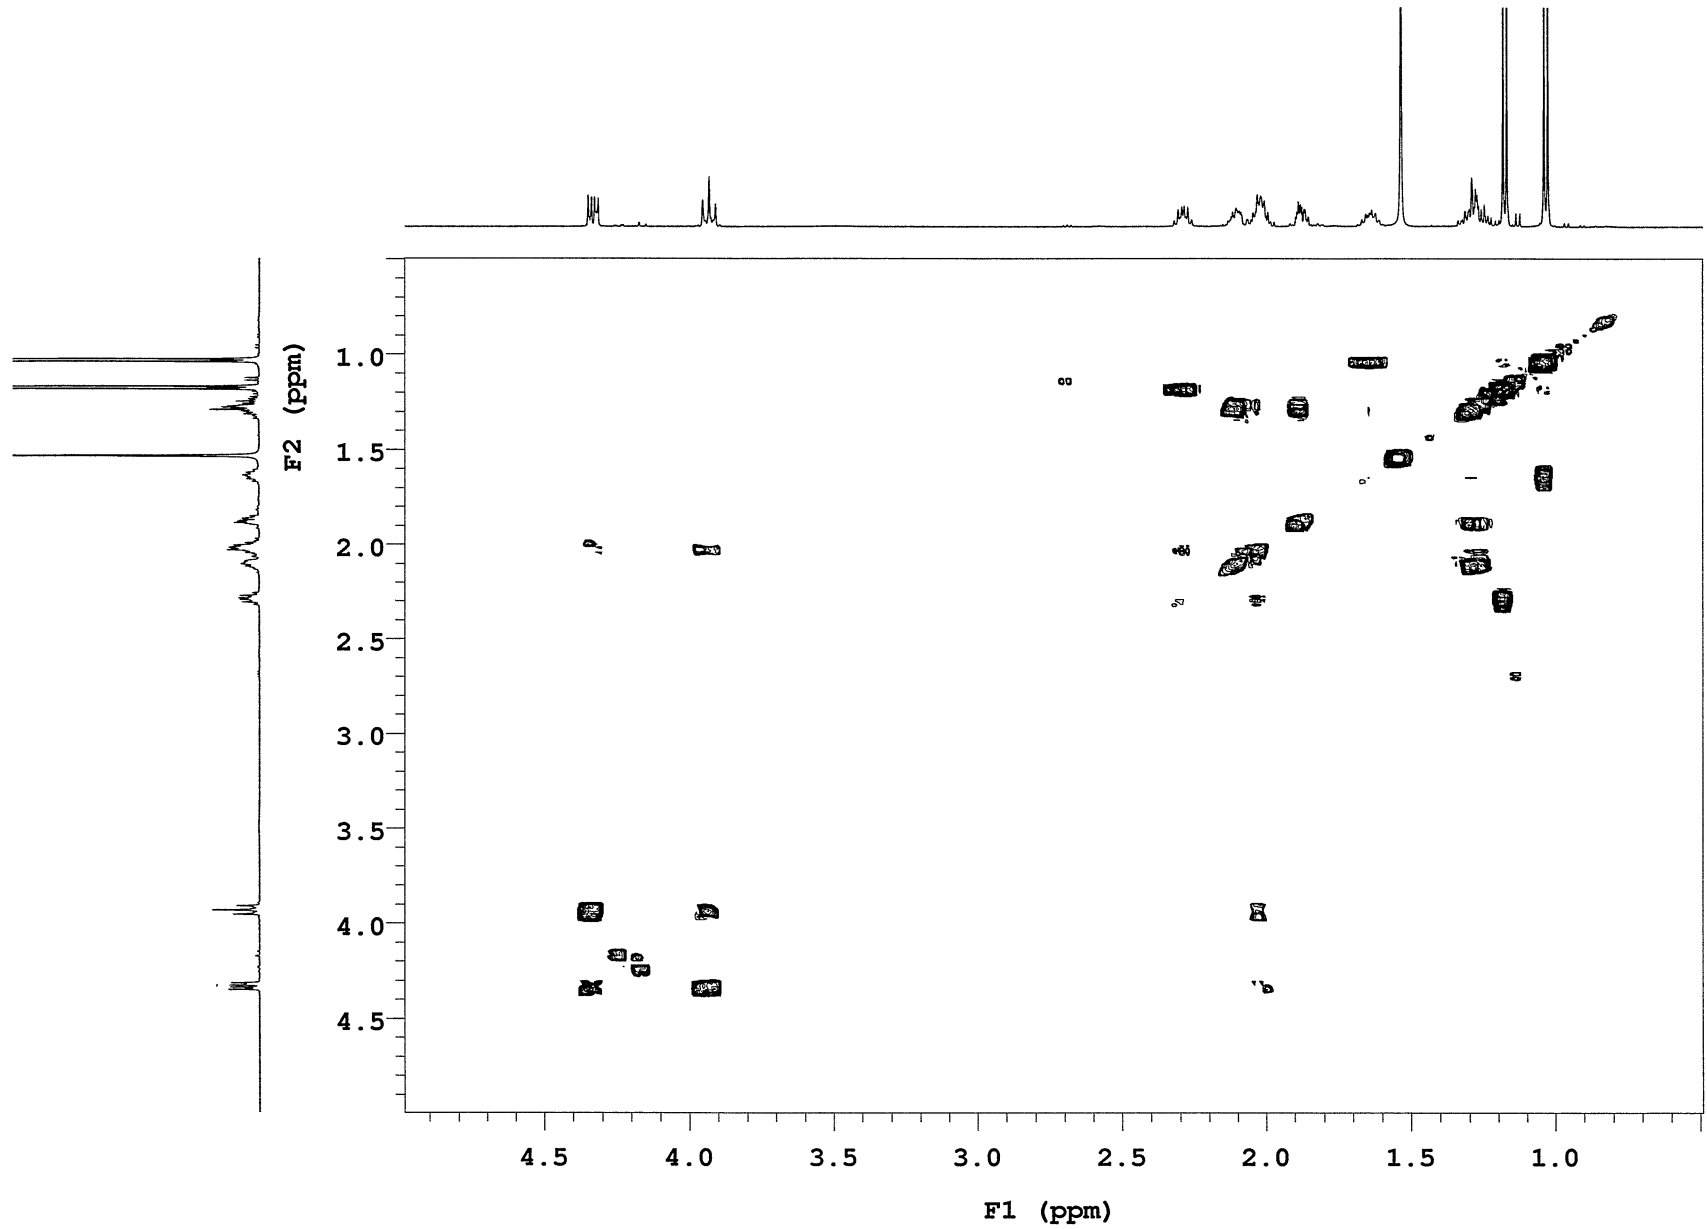

COSY of compound 15

Sample Name **RRT-265**  
Date collected **2023-01-14**

Pulse sequence **NOESY**  
Solvent **cdcl3**

Temperature **25**  
Spectrometer **Agilent-NMR-inova500**

Study owner **vnmr2**  
Operator **vnmr2**

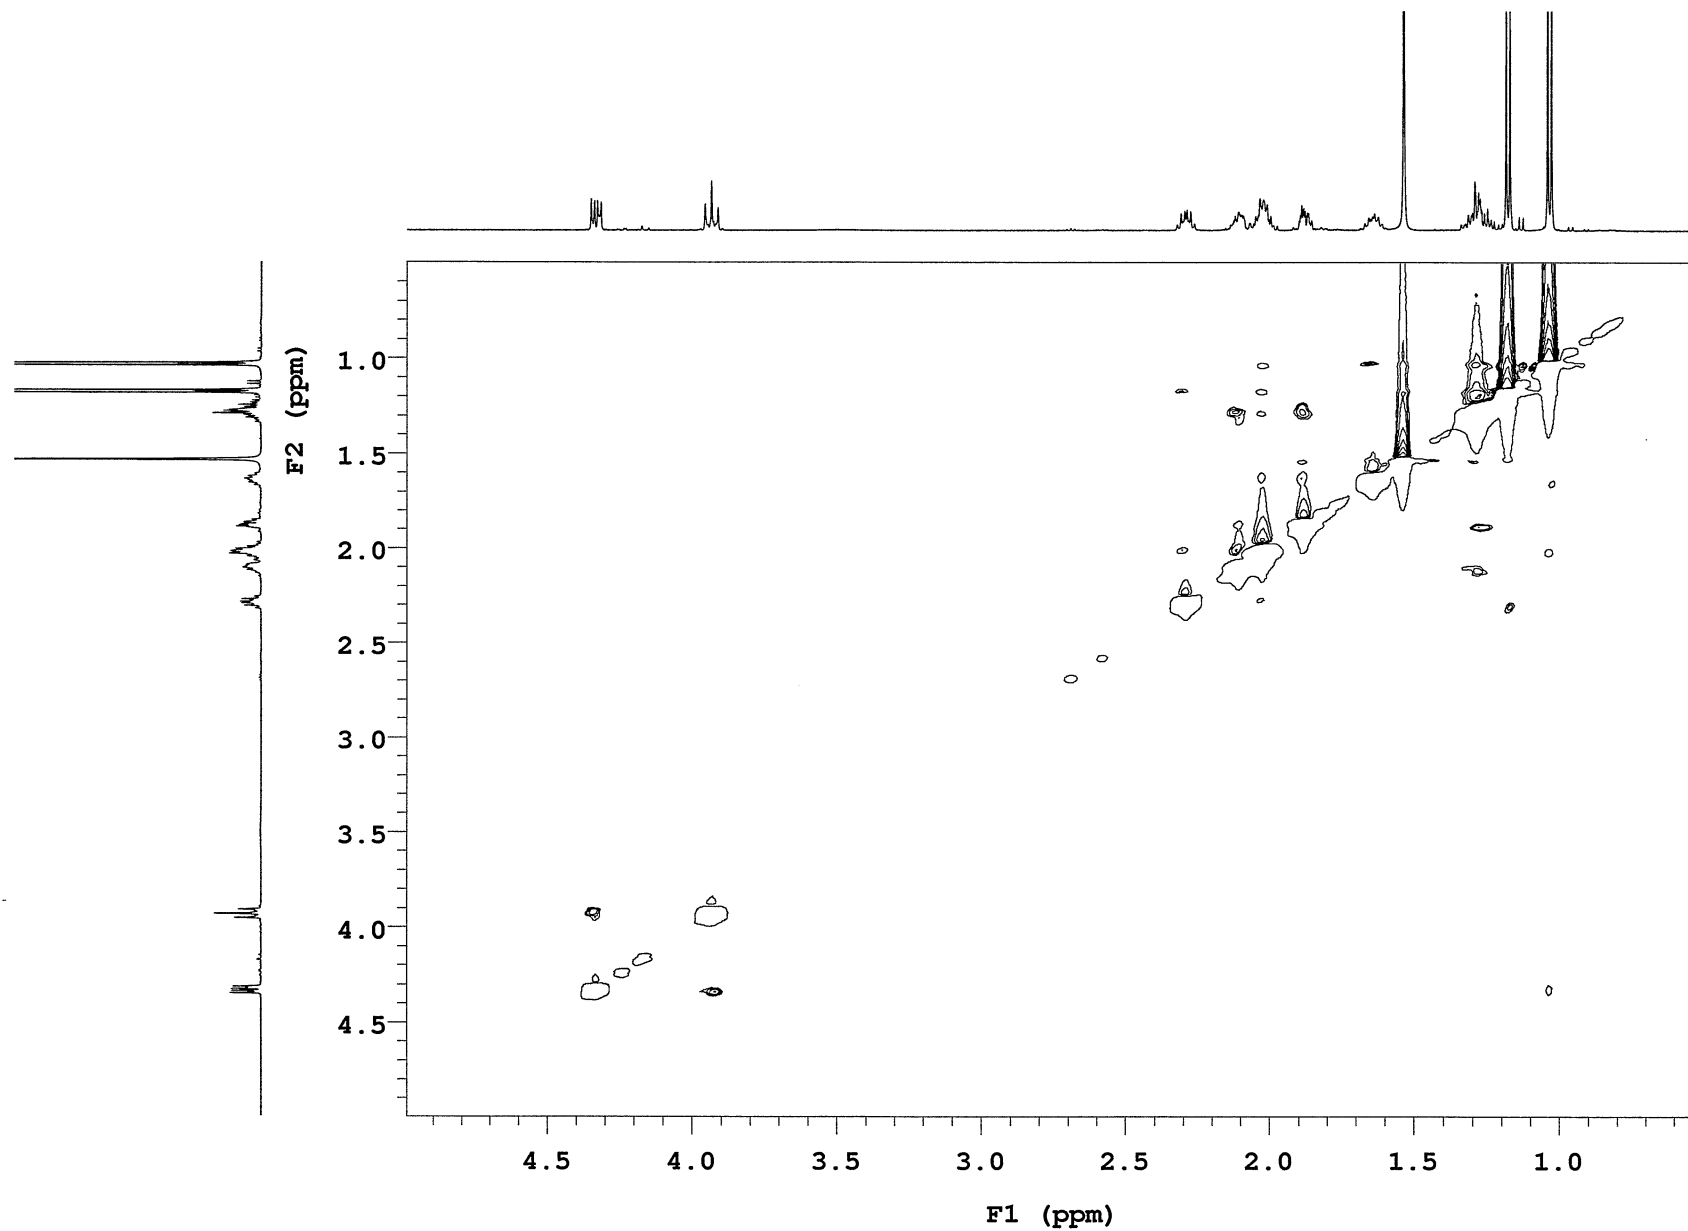

NOESY of compound 15

Sample Name RRT-241\_and\_RRT-264  
Date collected 2023-01-14

Pulse sequence PROTON  
Solvent cdcl3

Temperature 25  
Spectrometer Agilent-NMR-inova500

Study owner vnmr2  
Operator vnmr2

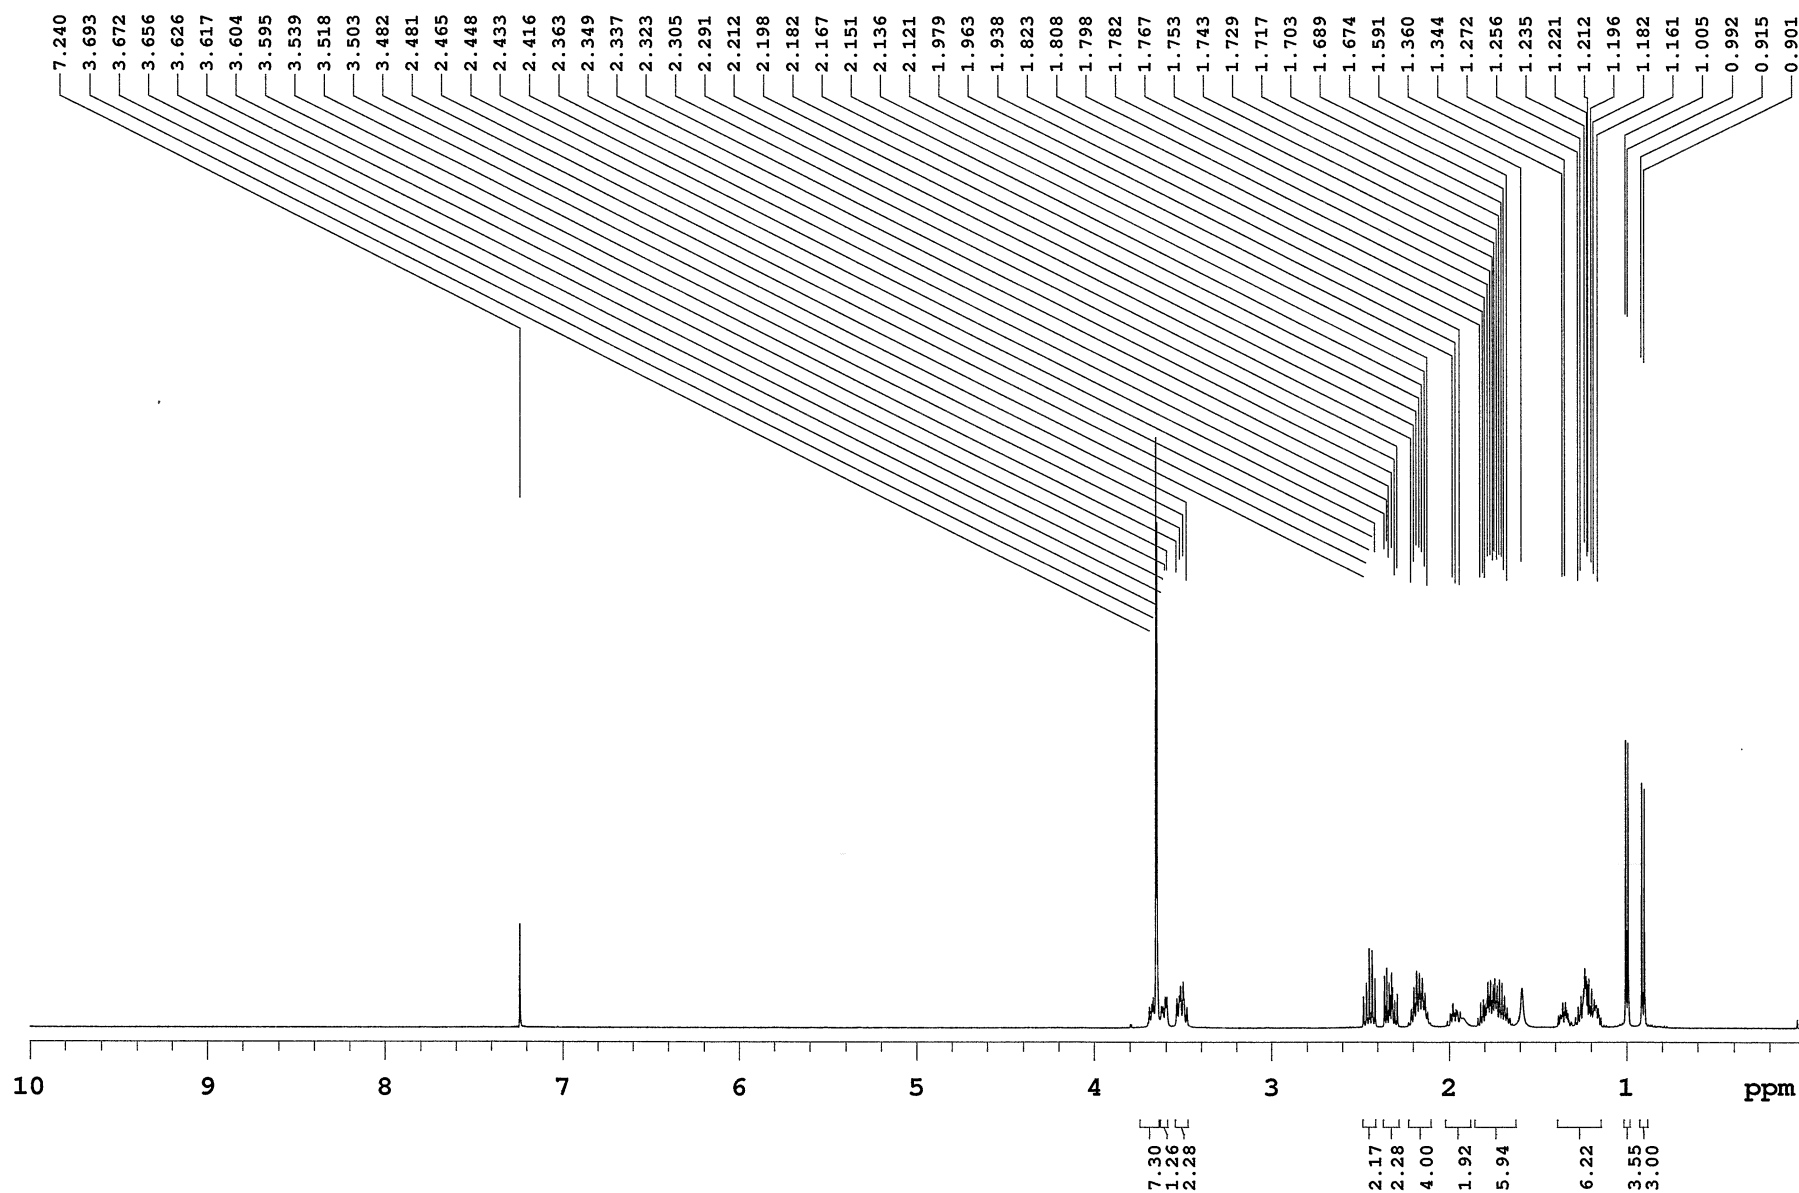

**1H NMR (500 MHz, CDCl<sub>3</sub>) of the mixture of **4** and **16**  
(Scheme 3)**

Sample Name RRT-241\_and\_RRT-264  
Date collected 2023-01-14

Pulse sequence CARBON  
Solvent cdcl3

Temperature 25  
Spectrometer Agilent-NMR-inova500

Study owner vnmr2  
Operator vnmr2

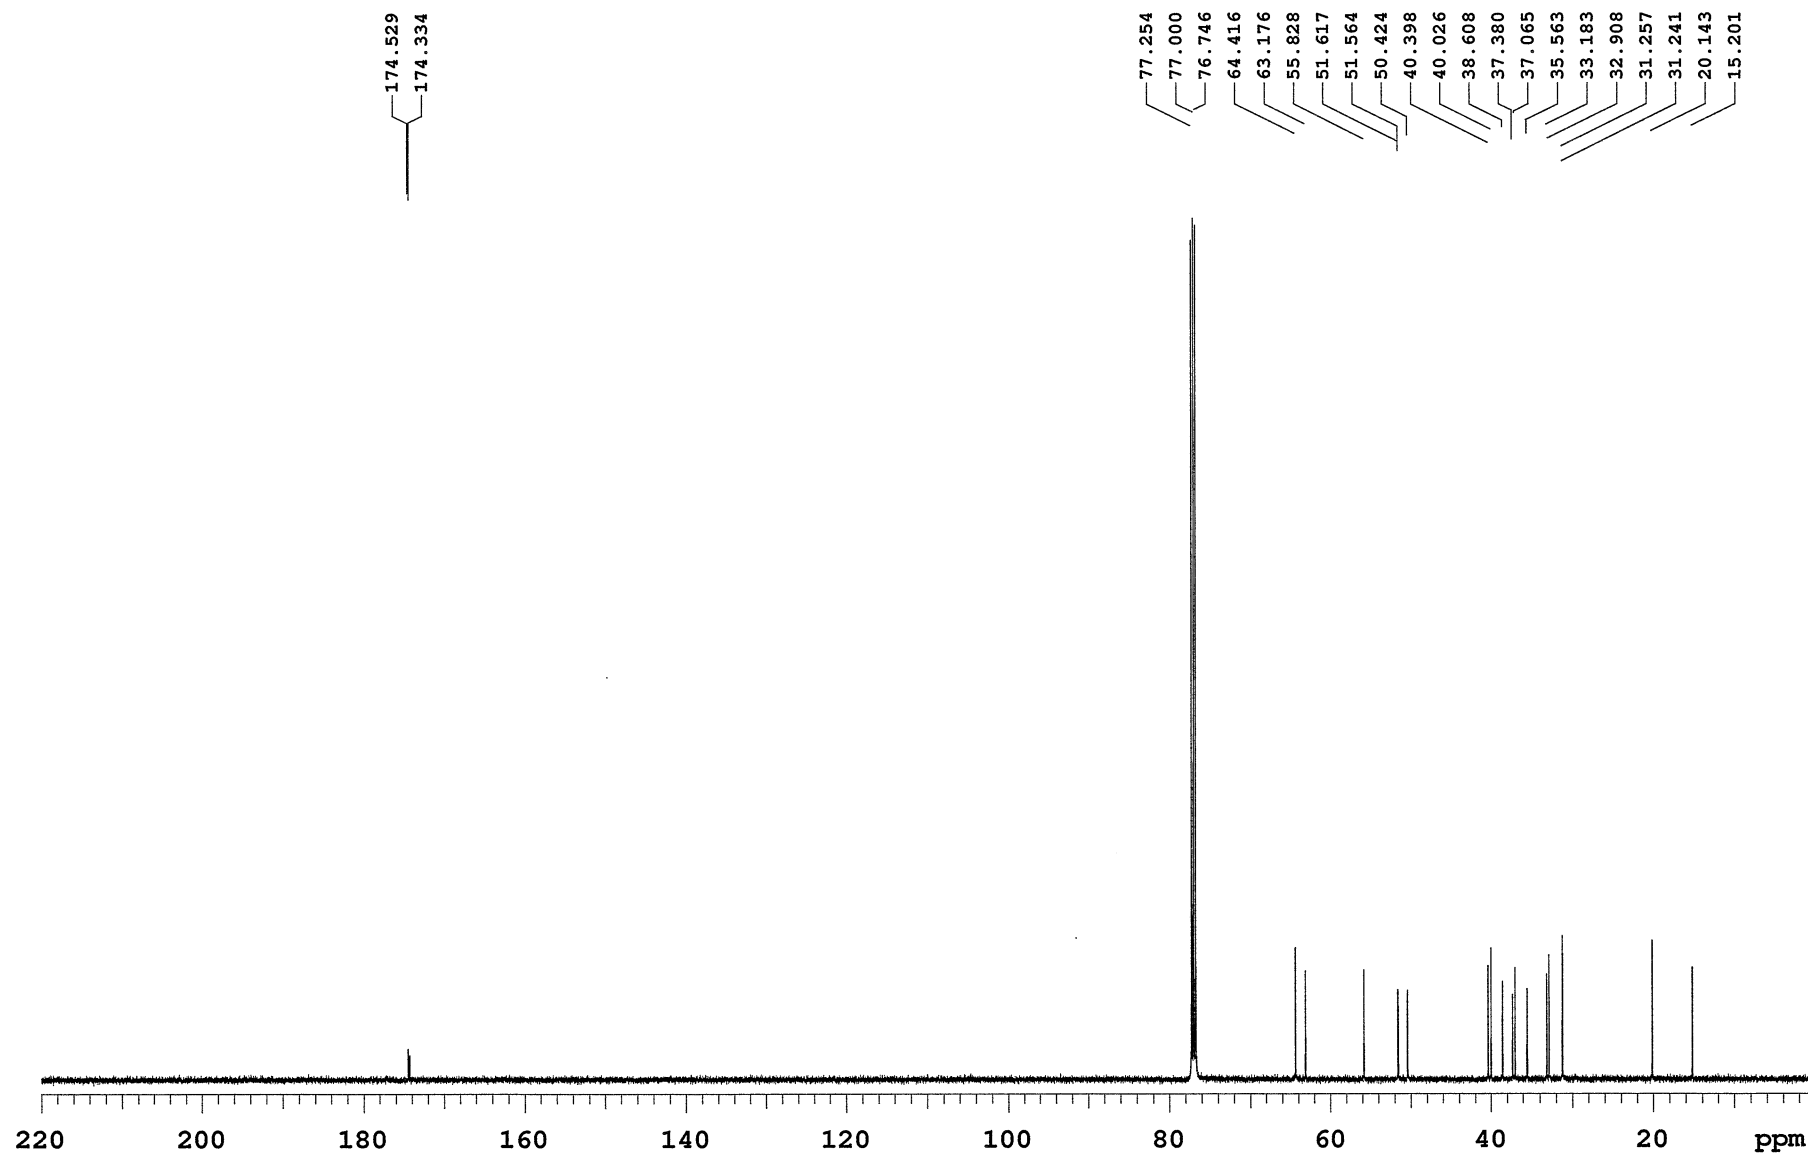

**<sup>13</sup>C NMR (125 MHz, CDCl<sub>3</sub>) of the mixture of **4** and **16**  
(Scheme 3)**

Sample Name RRT-241\_and\_RRT-264  
Date collected 2023-01-14

Pulse sequence DEPT  
Solvent cdcl3

Temperature 25  
Spectrometer Agilent-NMR-inova500

Study owner vnmr2  
Operator vnmr2

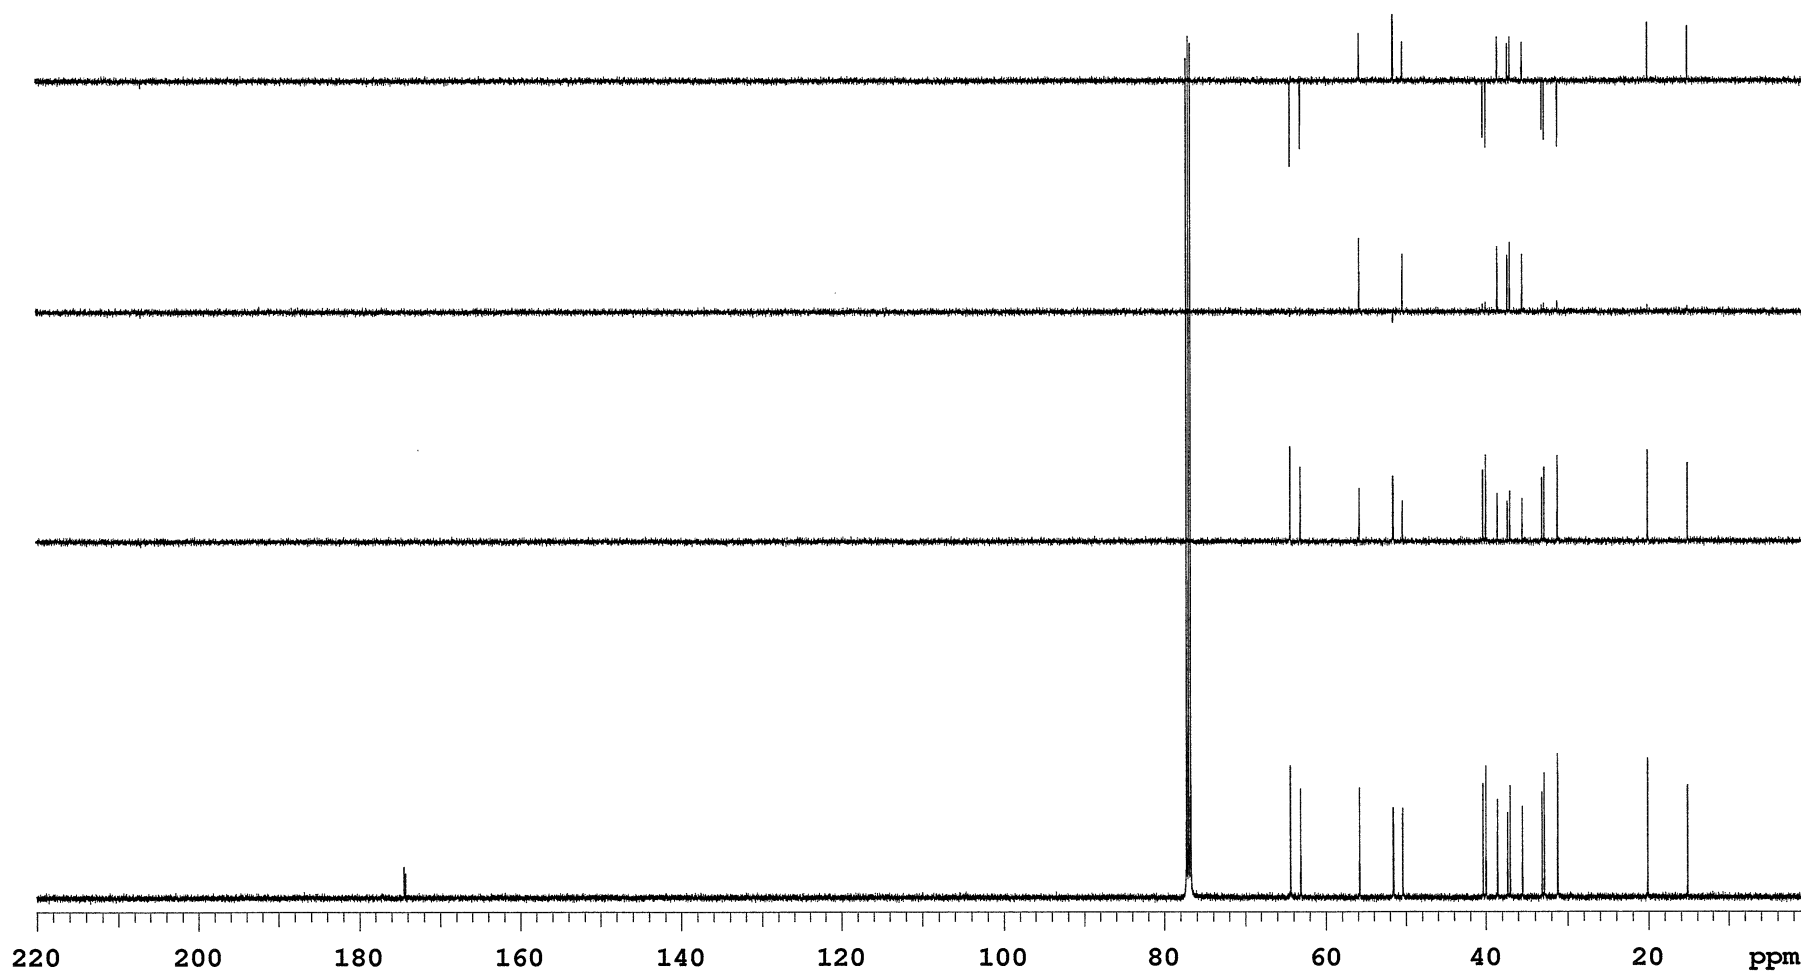

DEPT of the mixture of **4** and **16** (Scheme 3)

Sample Name RRT-241\_and\_RRT-264  
Date collected 2023-01-15

Pulse sequence gHSQC  
Solvent cdcl3

Temperature 25  
Spectrometer Agilent-NMR-inova500

Study owner vnmr2  
Operator vnmr2

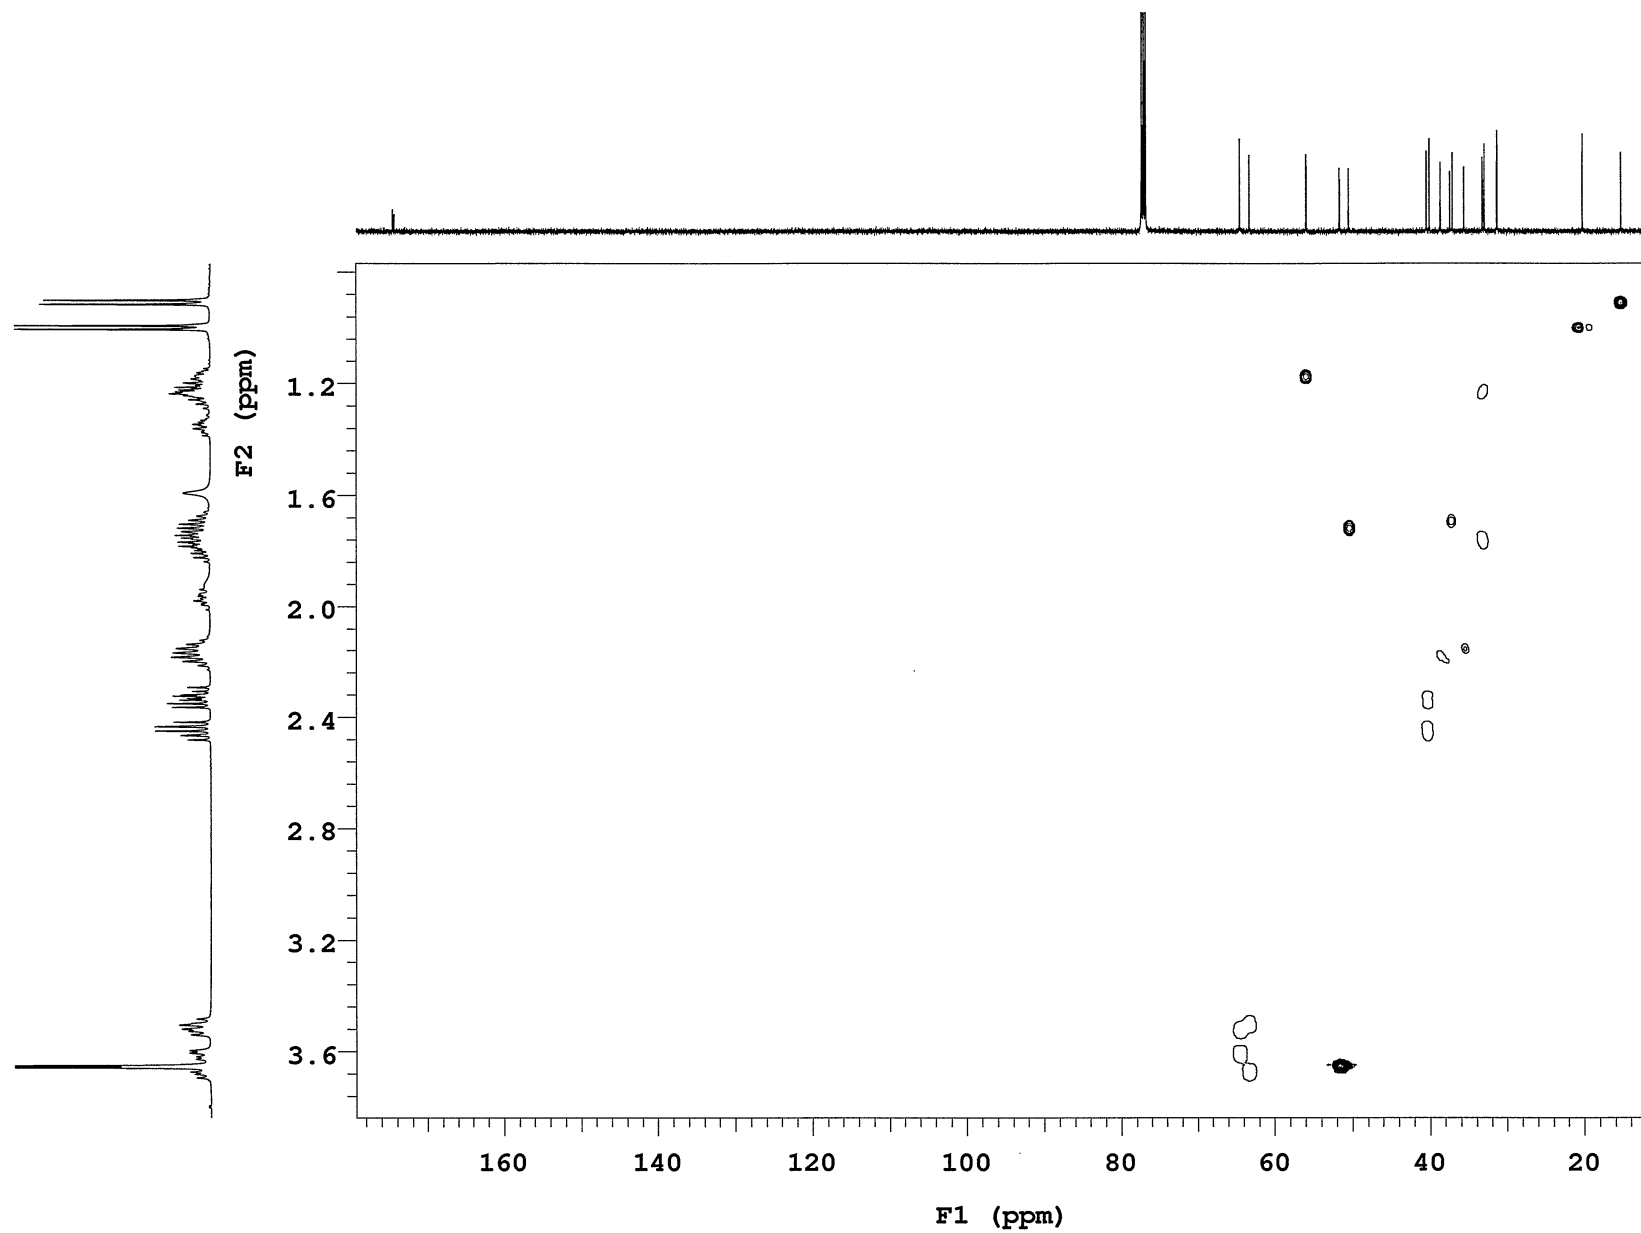HSQC of the mixture of **4** and **16** (Scheme 3)

Sample Name RRT-241\_and\_RRT-264  
Date collected 2023-01-15

Pulse sequence gCOSY  
Solvent cdcl3

Temperature 25  
Spectrometer Agilent-NMR-inova500

Study owner vnmr2  
Operator vnmr2

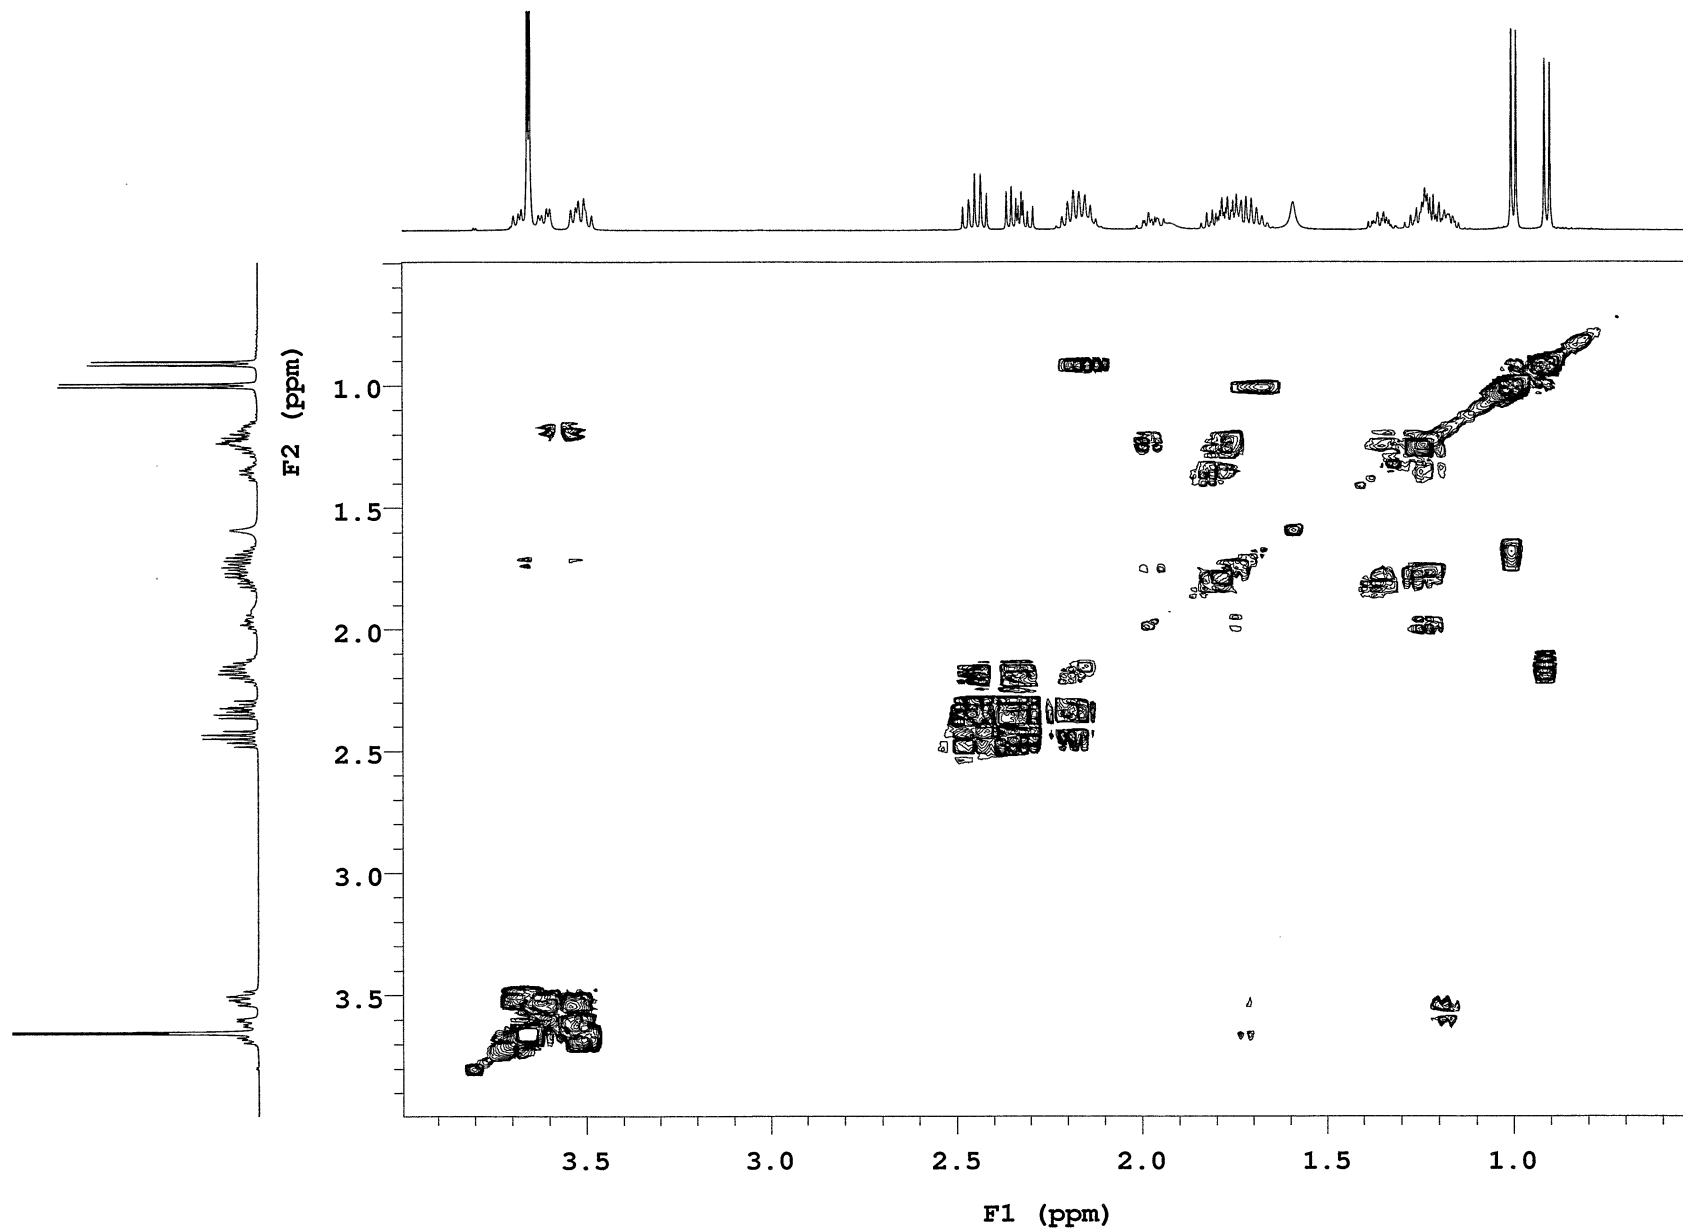

COSY of the mixture of **4** and **16** (Scheme 3)



Sample Name RRT-241\_and\_RRT-264  
Date collected 2023-01-15

Pulse sequence NOESY  
Solvent cdcl3

Temperature 25  
Spectrometer Agilent-NMR-inova500

Study owner vnmr2  
Operator vnmr2

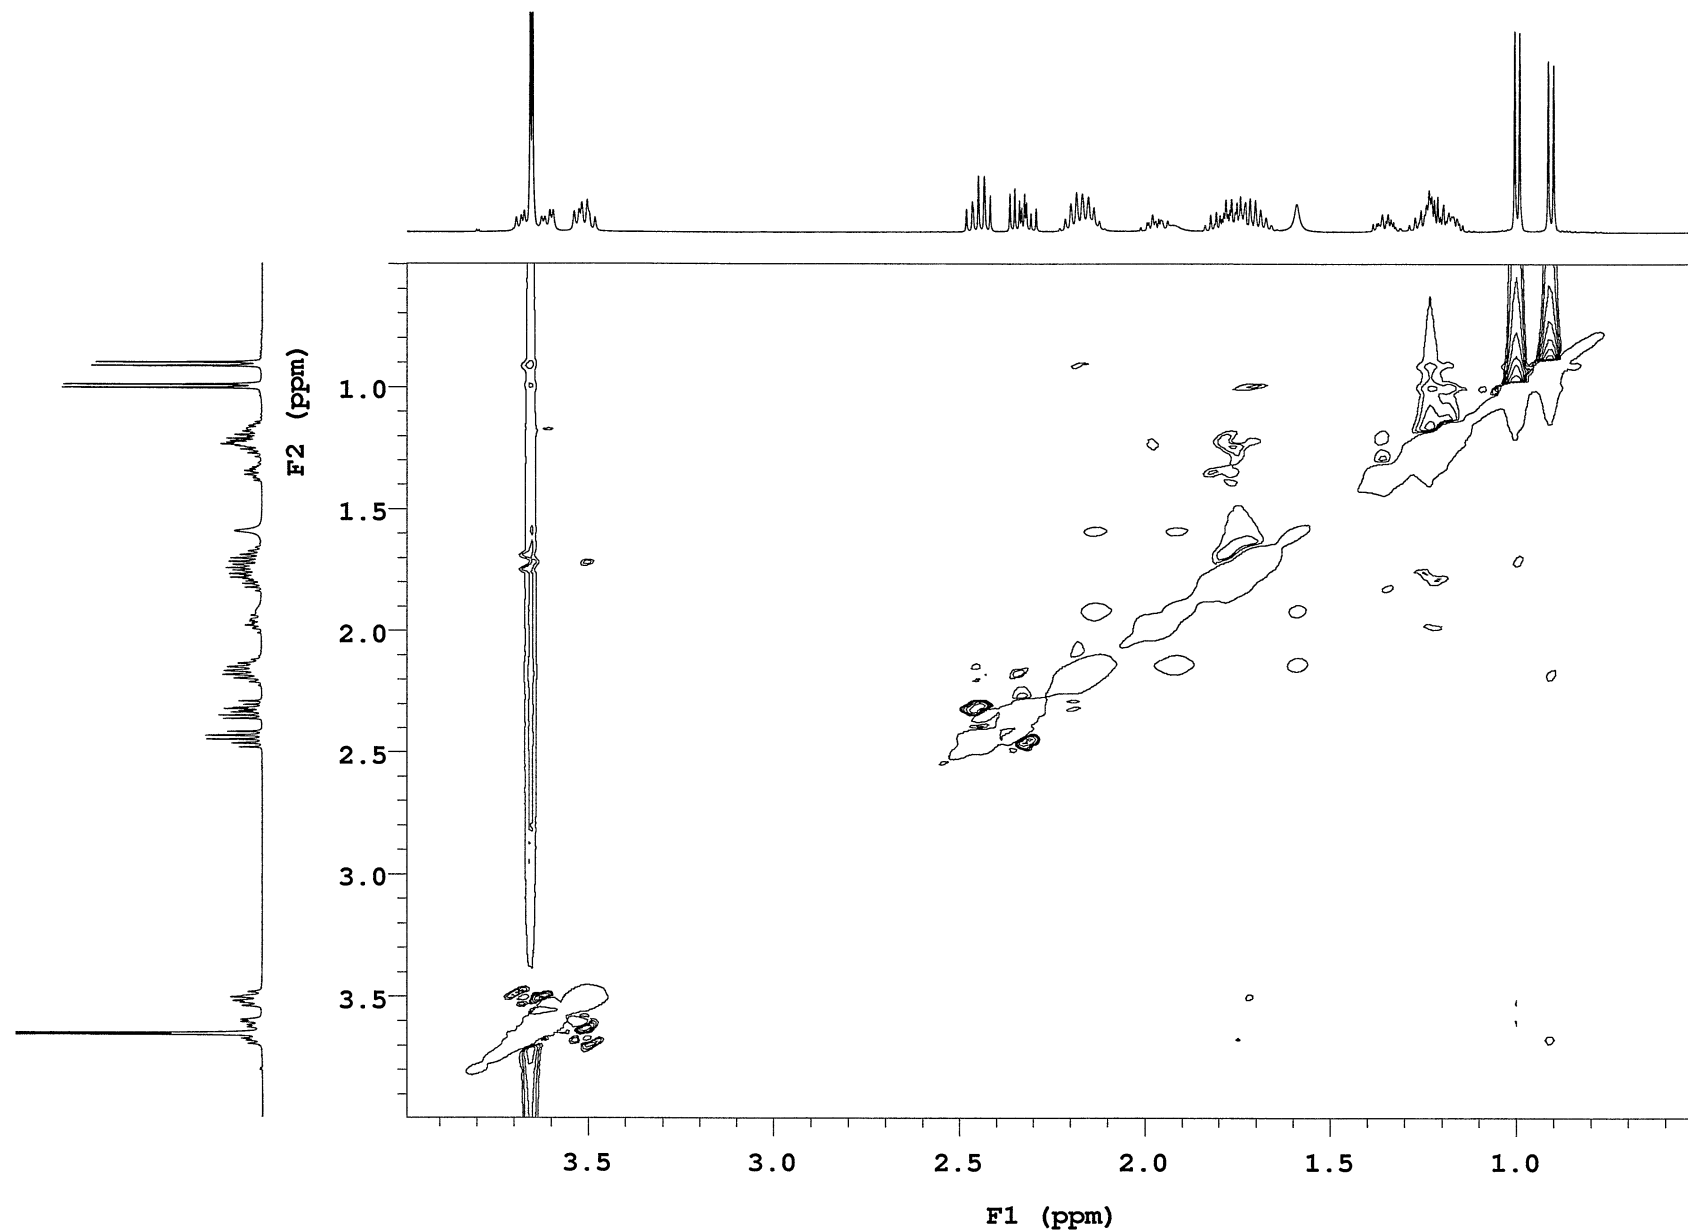

NOESY of the mixture of **4** and **16** (Scheme 3)

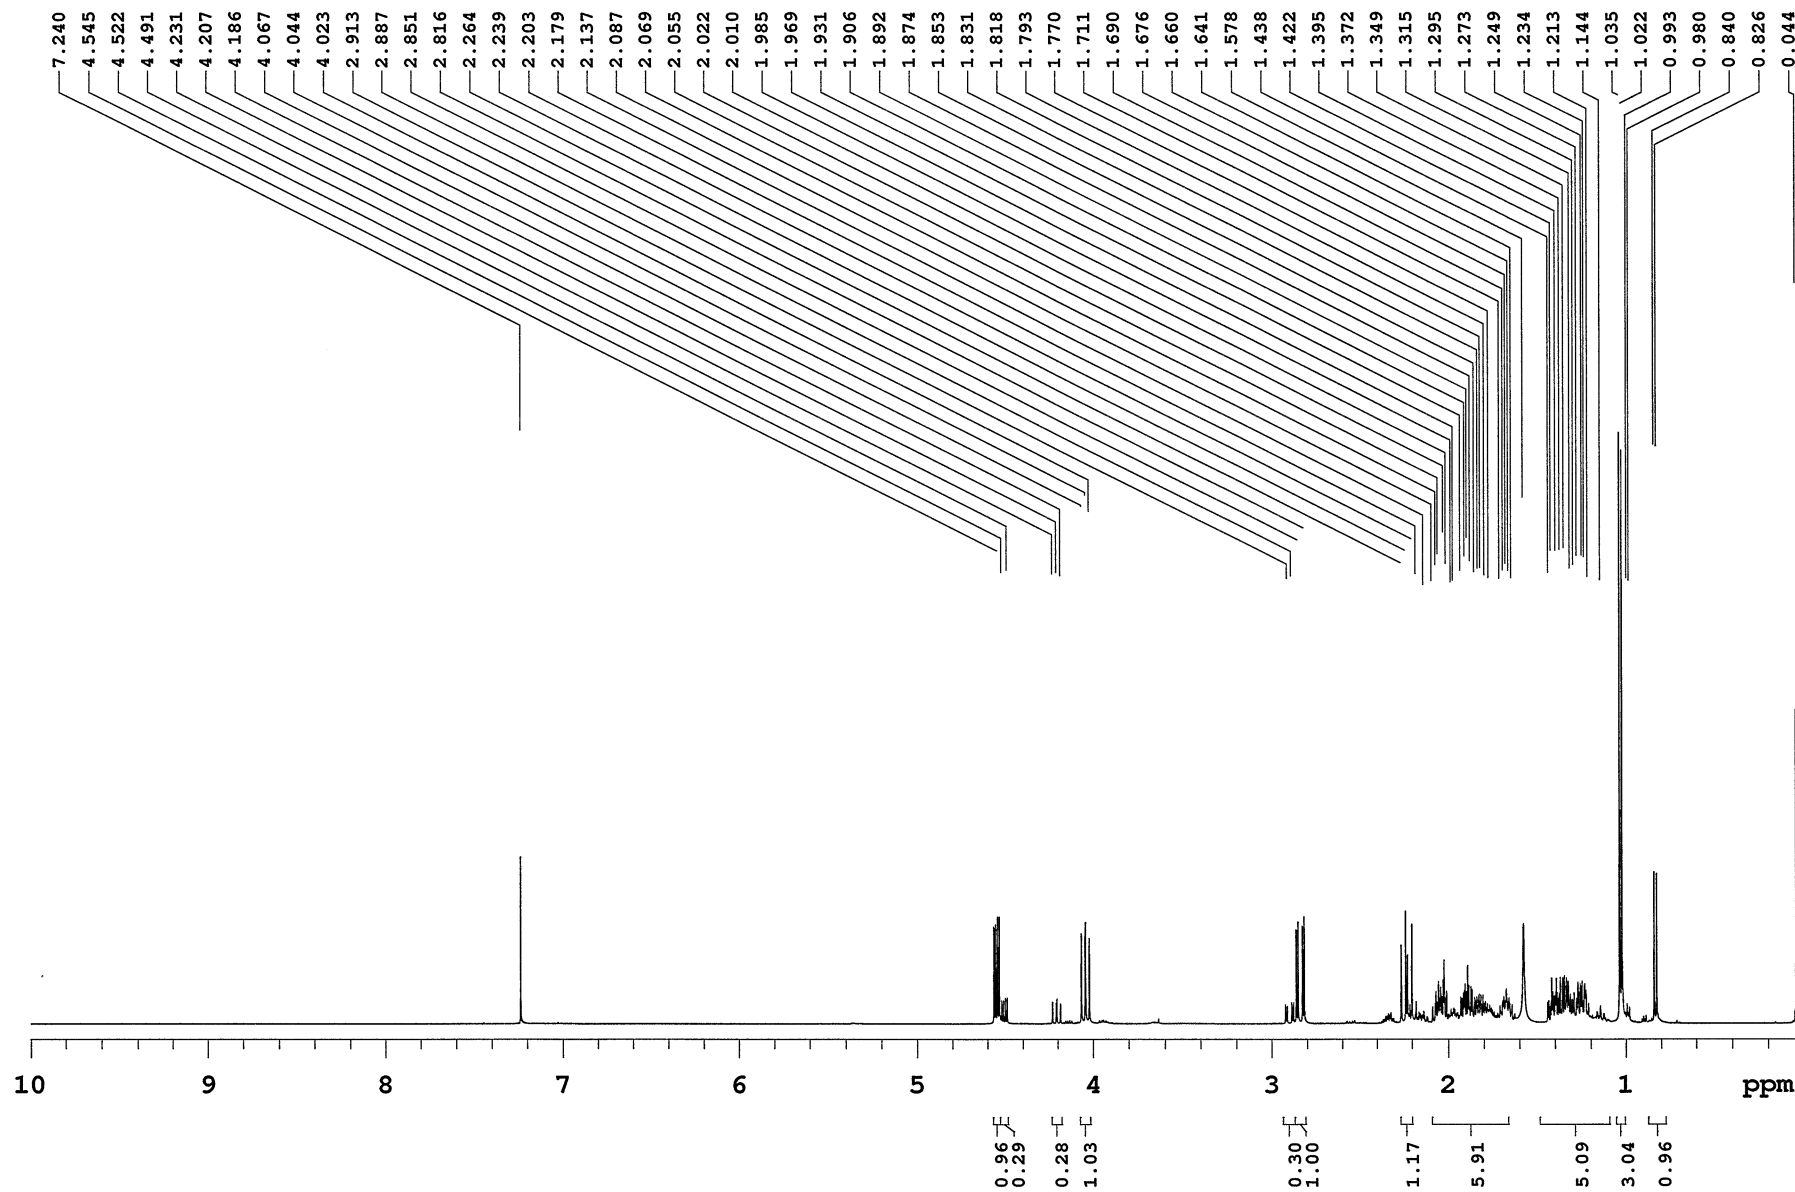

Sample Name **RRT-04-071**  
Date collected **2022-10-31**

Pulse sequence **CARBON**  
Solvent **cdcl3**

Temperature **25**  
Spectrometer **Agilent-NMR-inova500**

Study owner **vnmr2**  
Operator **vnmr2**

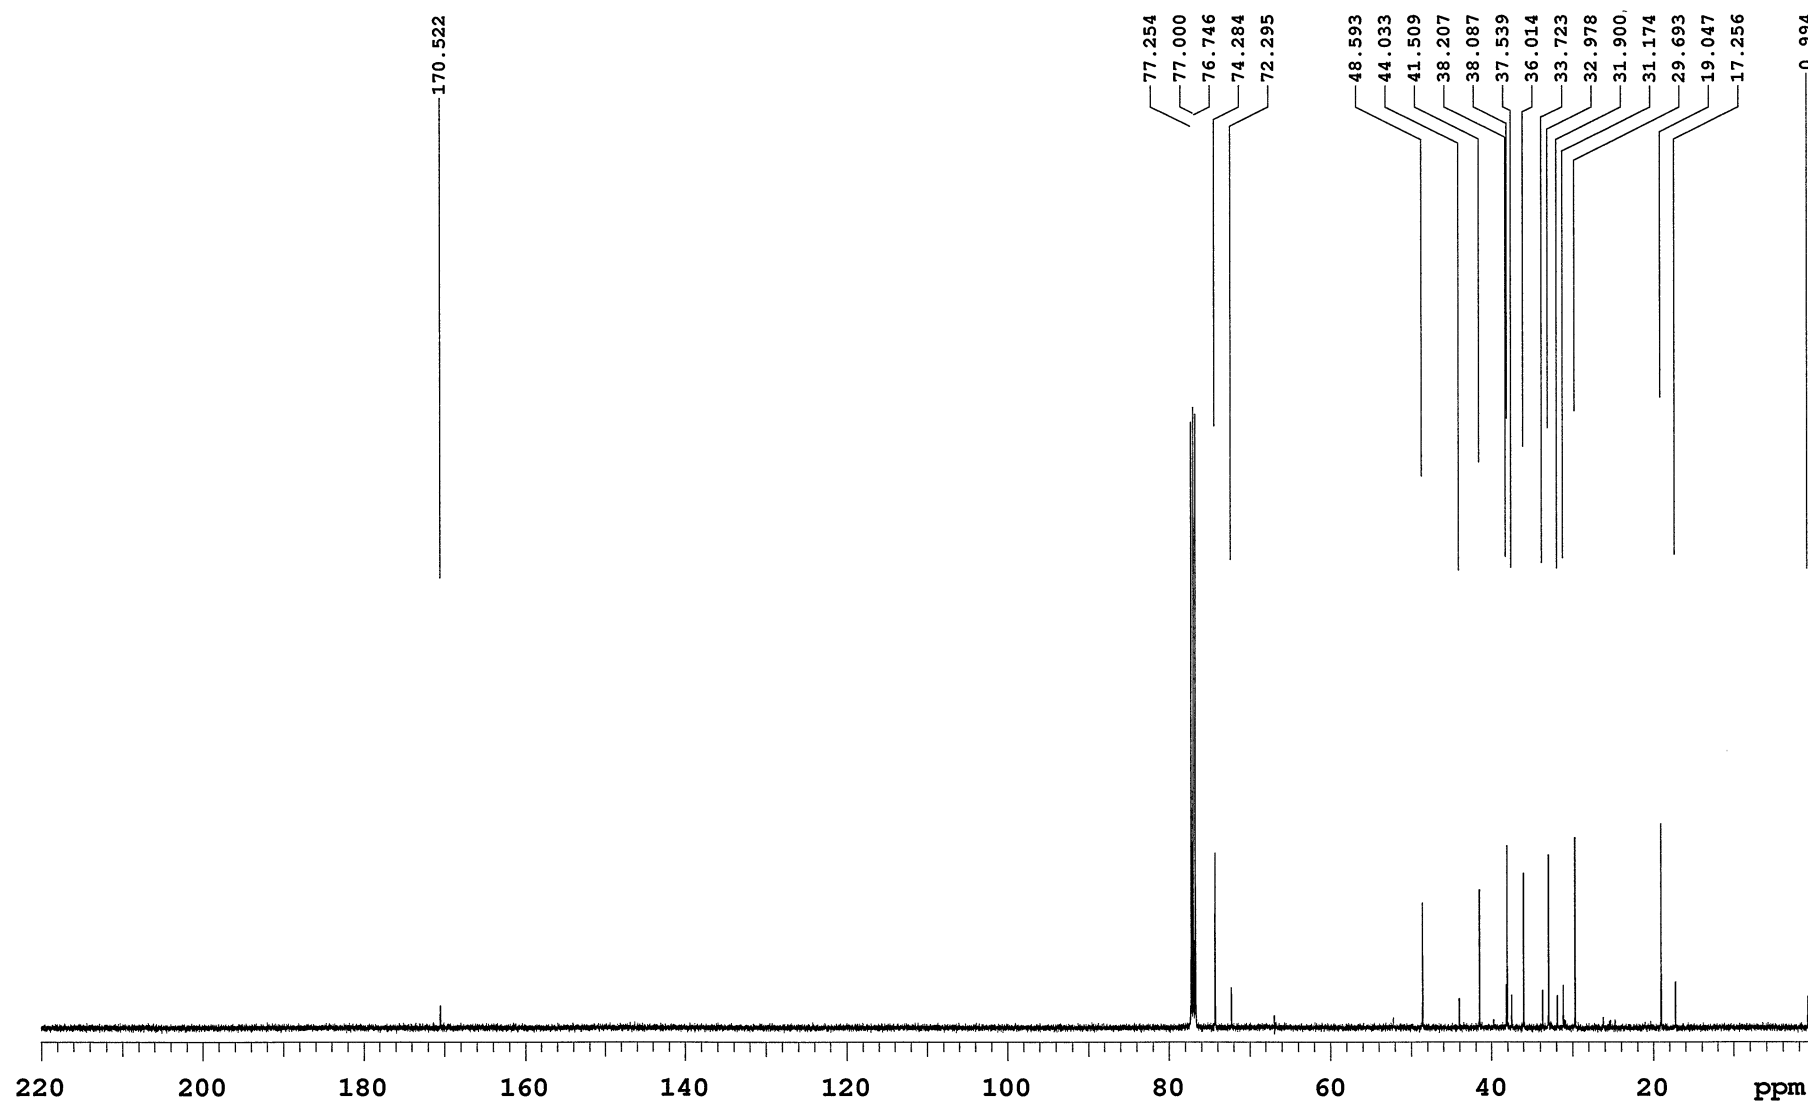

13C NMR (125 MHz, CDCl<sub>3</sub>) of the mixture of **5** and **17**  
(Scheme 3)

Sample Name **RRT-04-071**  
Date collected **2022-10-31**

Pulse sequence **DEPT**  
Solvent **cdcl3**

Temperature **25**  
Spectrometer **Agilent-NMR-inova500**

Study owner **vnmr2**  
Operator **vnmr2**

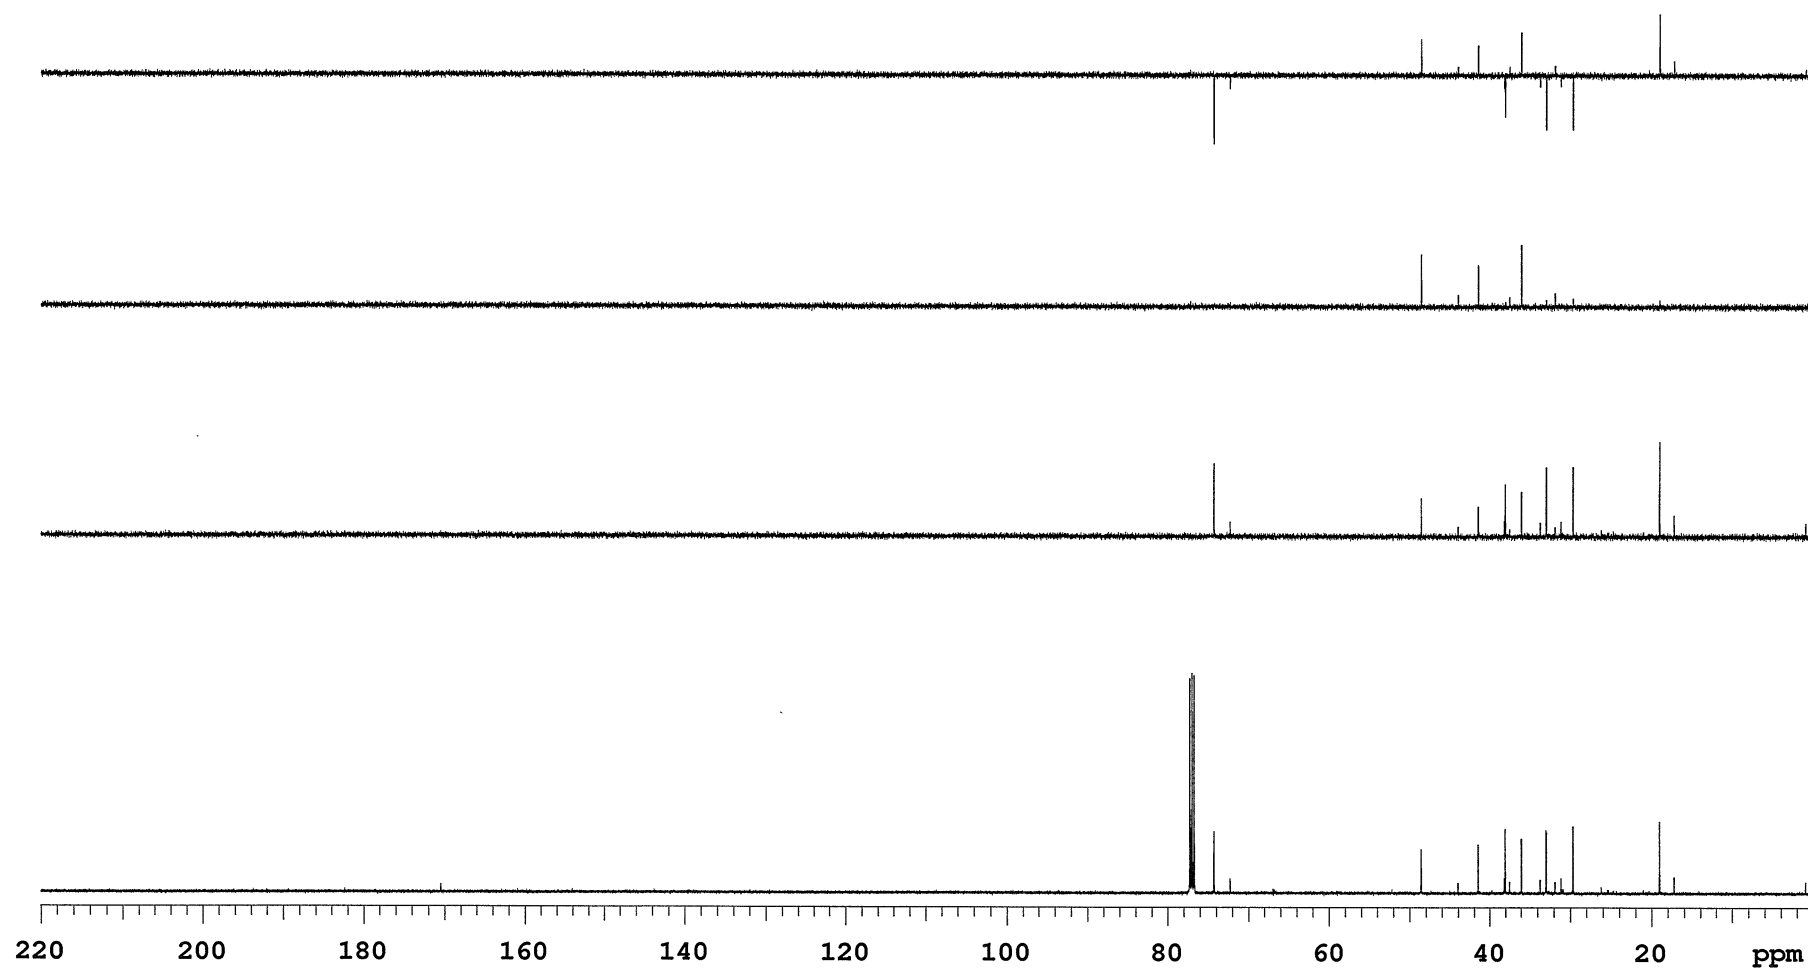

DEPT of the mixture of **5** and **17** (Scheme 3)

Sample Name **RRT-04-071**  
Date collected **2022-11-01**

Pulse sequence **gHSQC**  
Solvent **cdcl3**

Temperature **25**  
Spectrometer **Agilent-NMR-inova500**

Study owner **vnmr2**  
Operator **vnmr2**

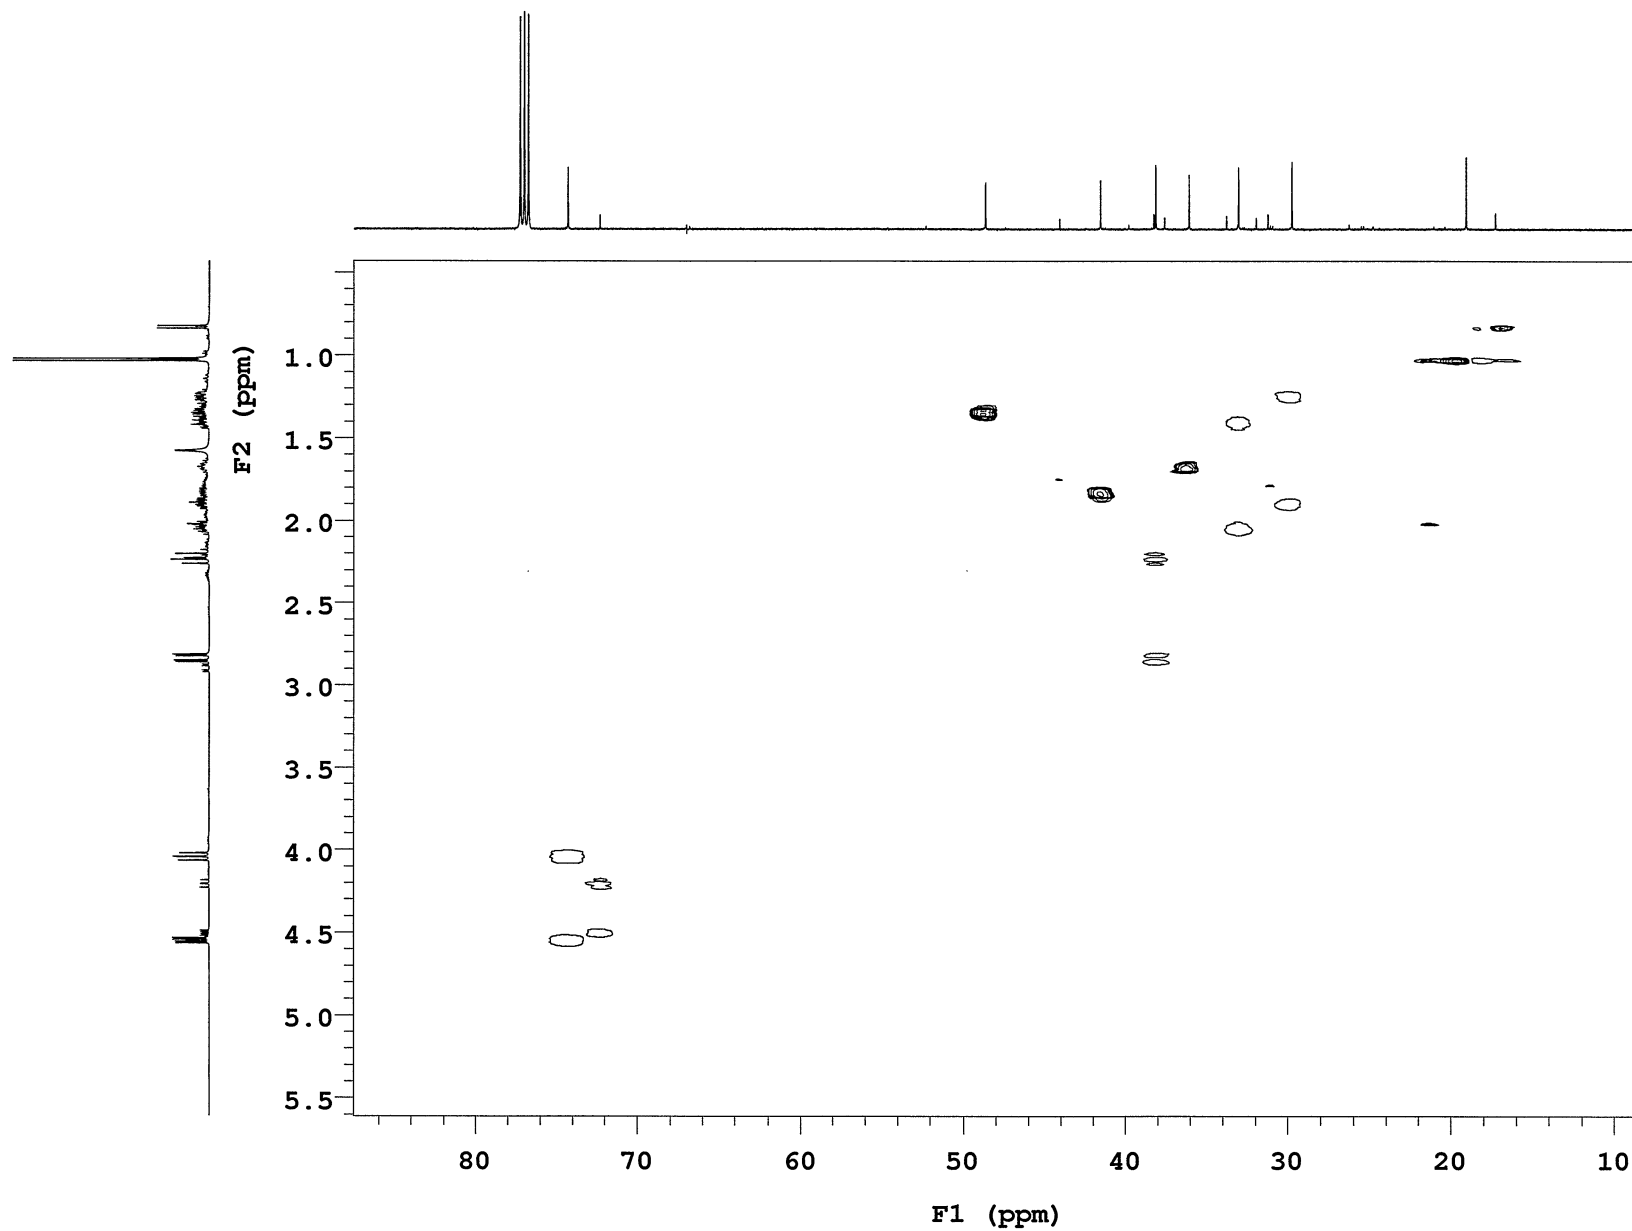

Sample Name RRT-04-071  
Date collected 2022-11-01

Pulse sequence gCOSY  
Solvent cdcl3

Temperature 25  
Spectrometer Agilent-NMR-inova500

Study owner vnmr2  
Operator vnmr2

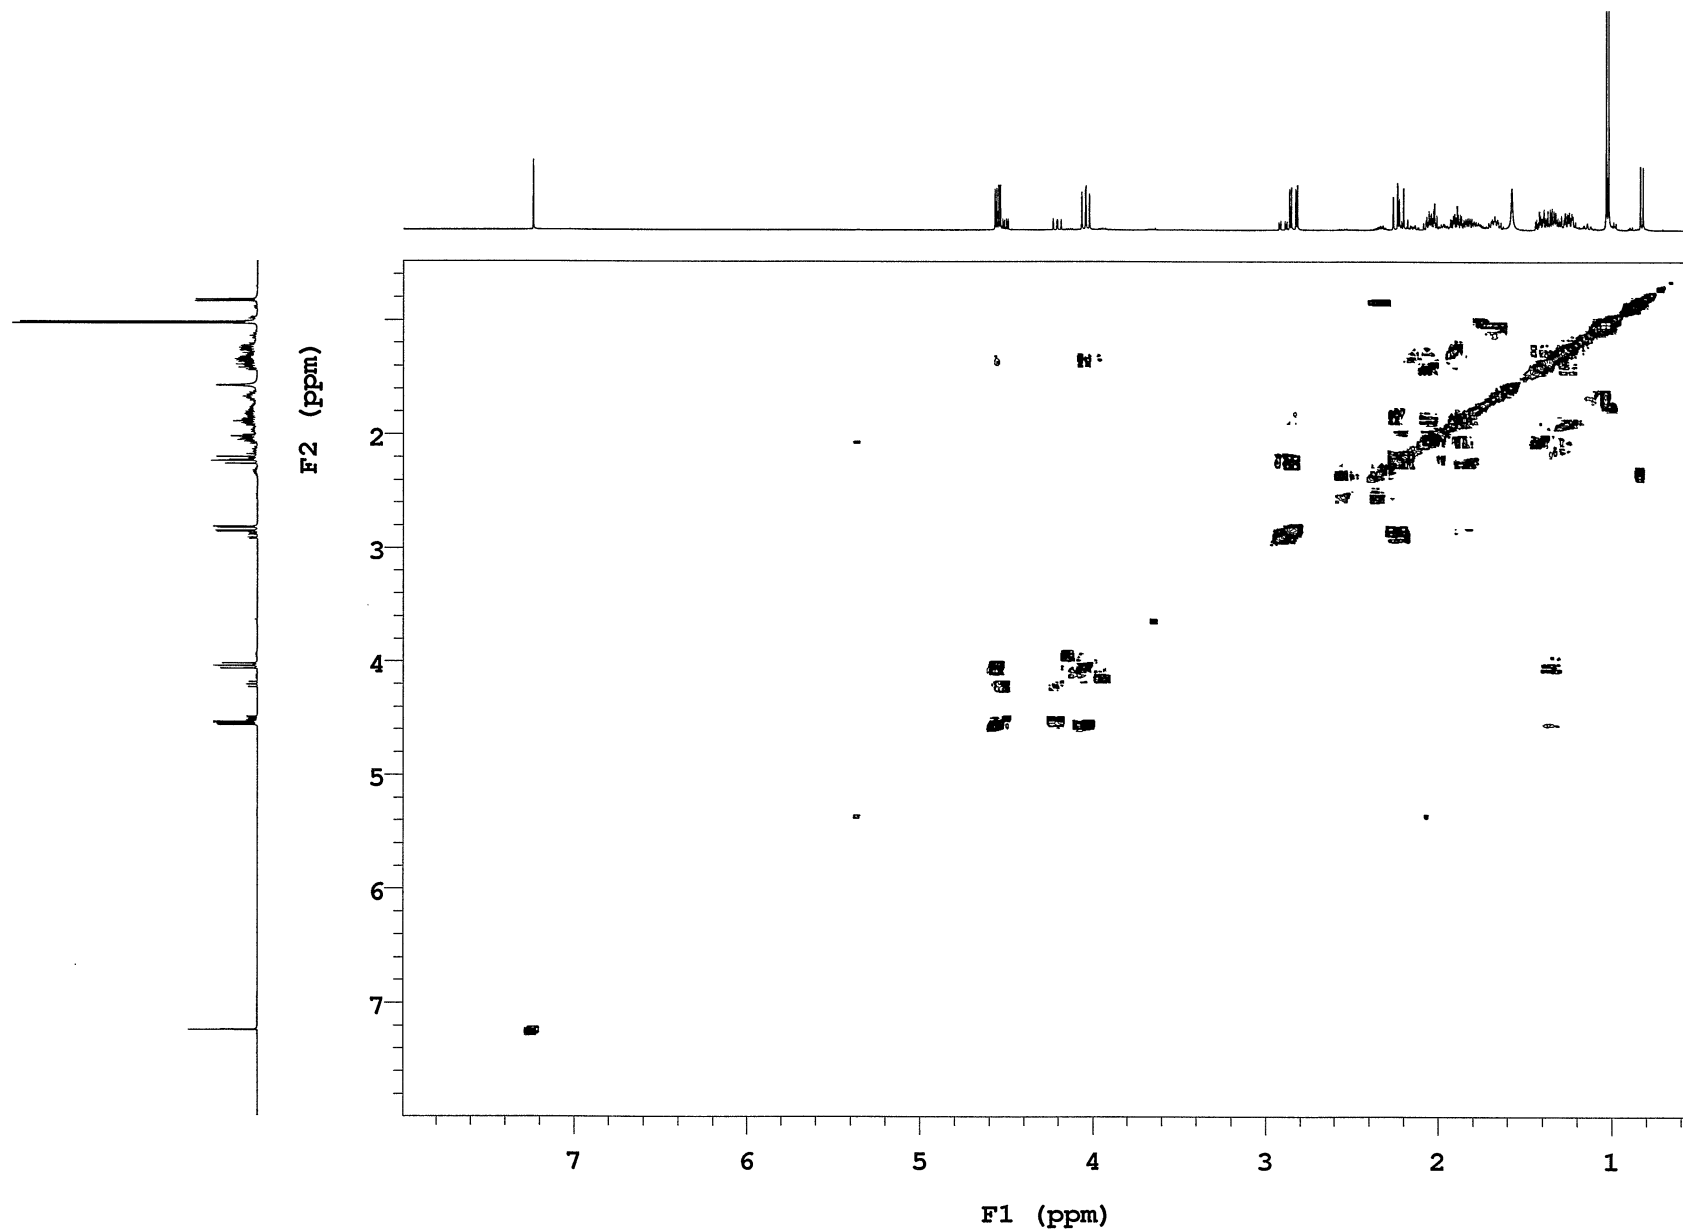

COSY of the mixture of **5** and **17** (Scheme 3)

Sample Name RRT-04-071  
Date collected 2022-11-01

Pulse sequence NOESY  
Solvent cdcl3

Temperature 25  
Spectrometer Agilent-NMR-inova500

Study owner vnmr2  
Operator vnmr2

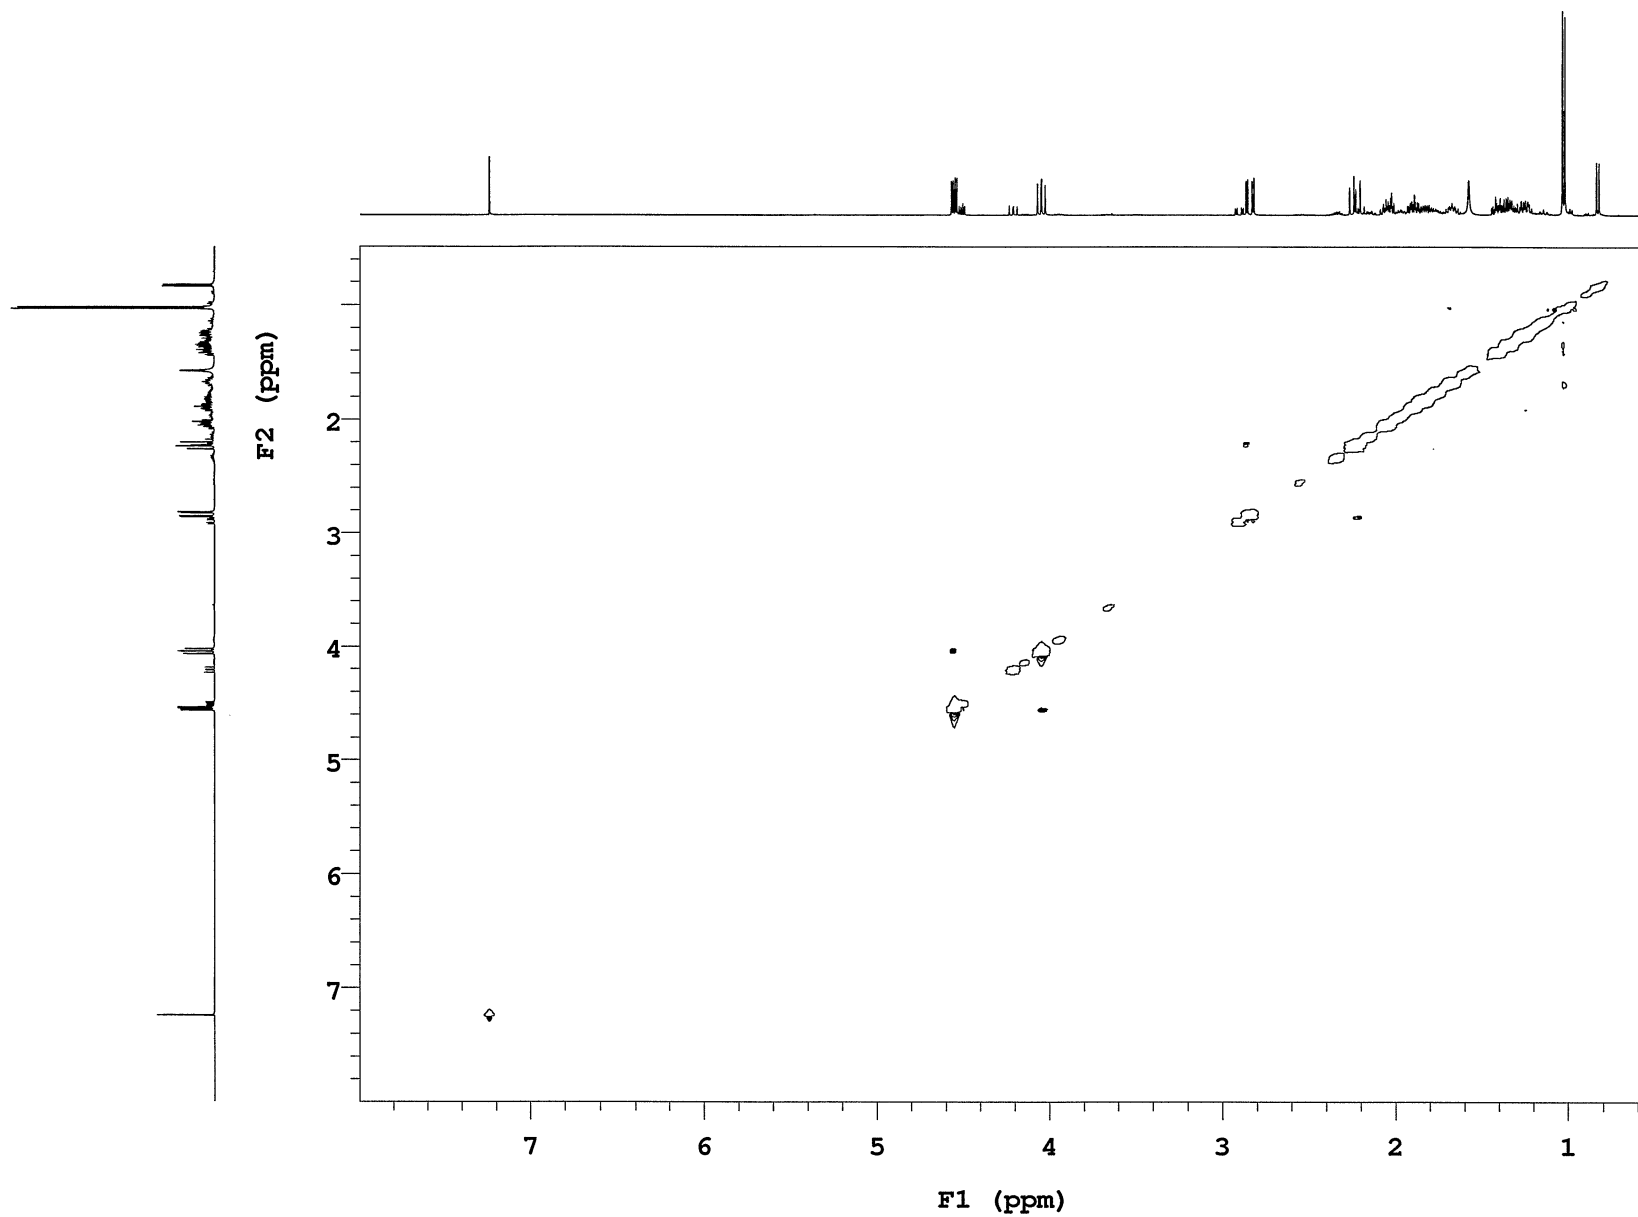

RRT-04-098-F6

compound 18 ↓

compound 7 ↓

Sample Name RRT-04-098-F6  
Date collected 2023-02-12Pulse sequence CARBON  
Solvent cdcl3Temperature 25  
Spectrometer Agilent-NMR-inova500Study owner vnmr2  
Operator vnmr2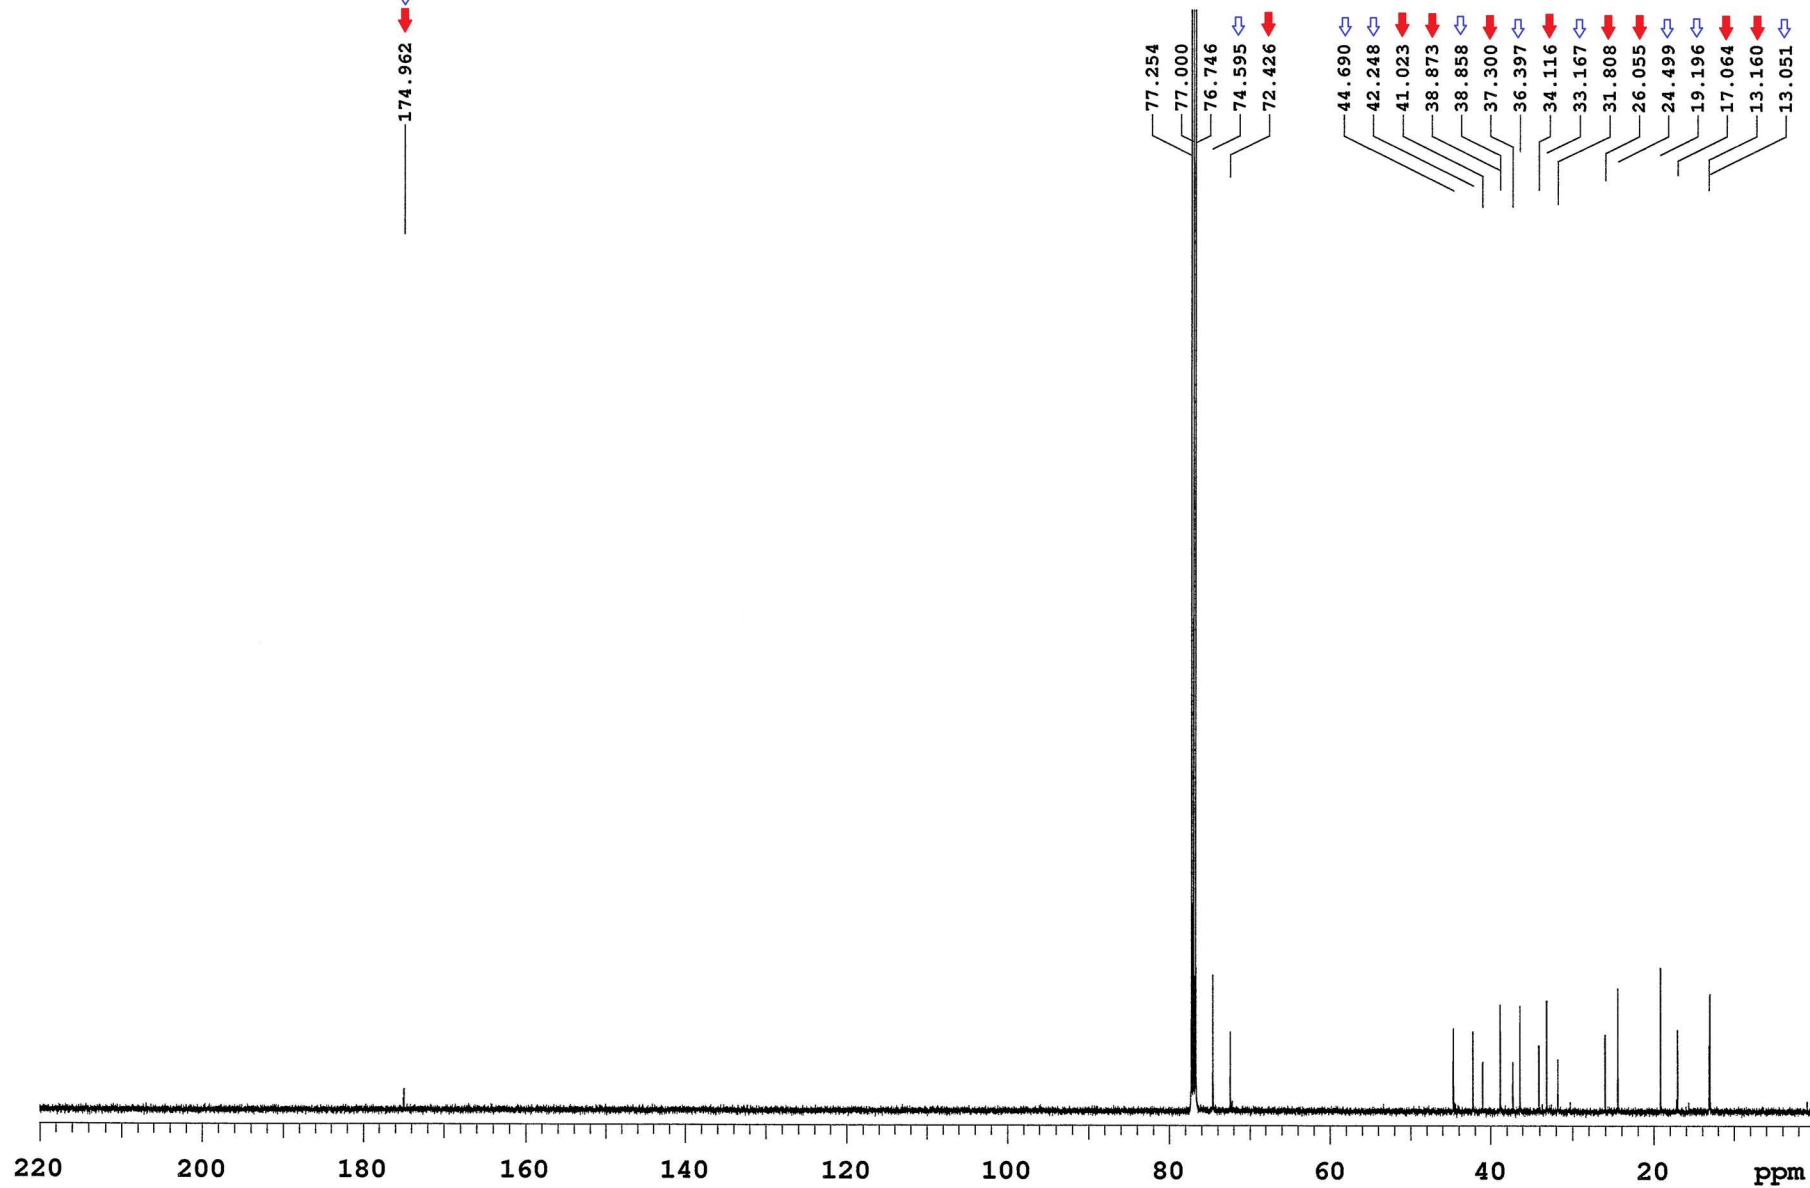13C NMR (125 MHz, CDCl<sub>3</sub>) of the mixture of **7** (major) and **18** (minor), Scheme 3



compound 19 ↓

↓  
173.939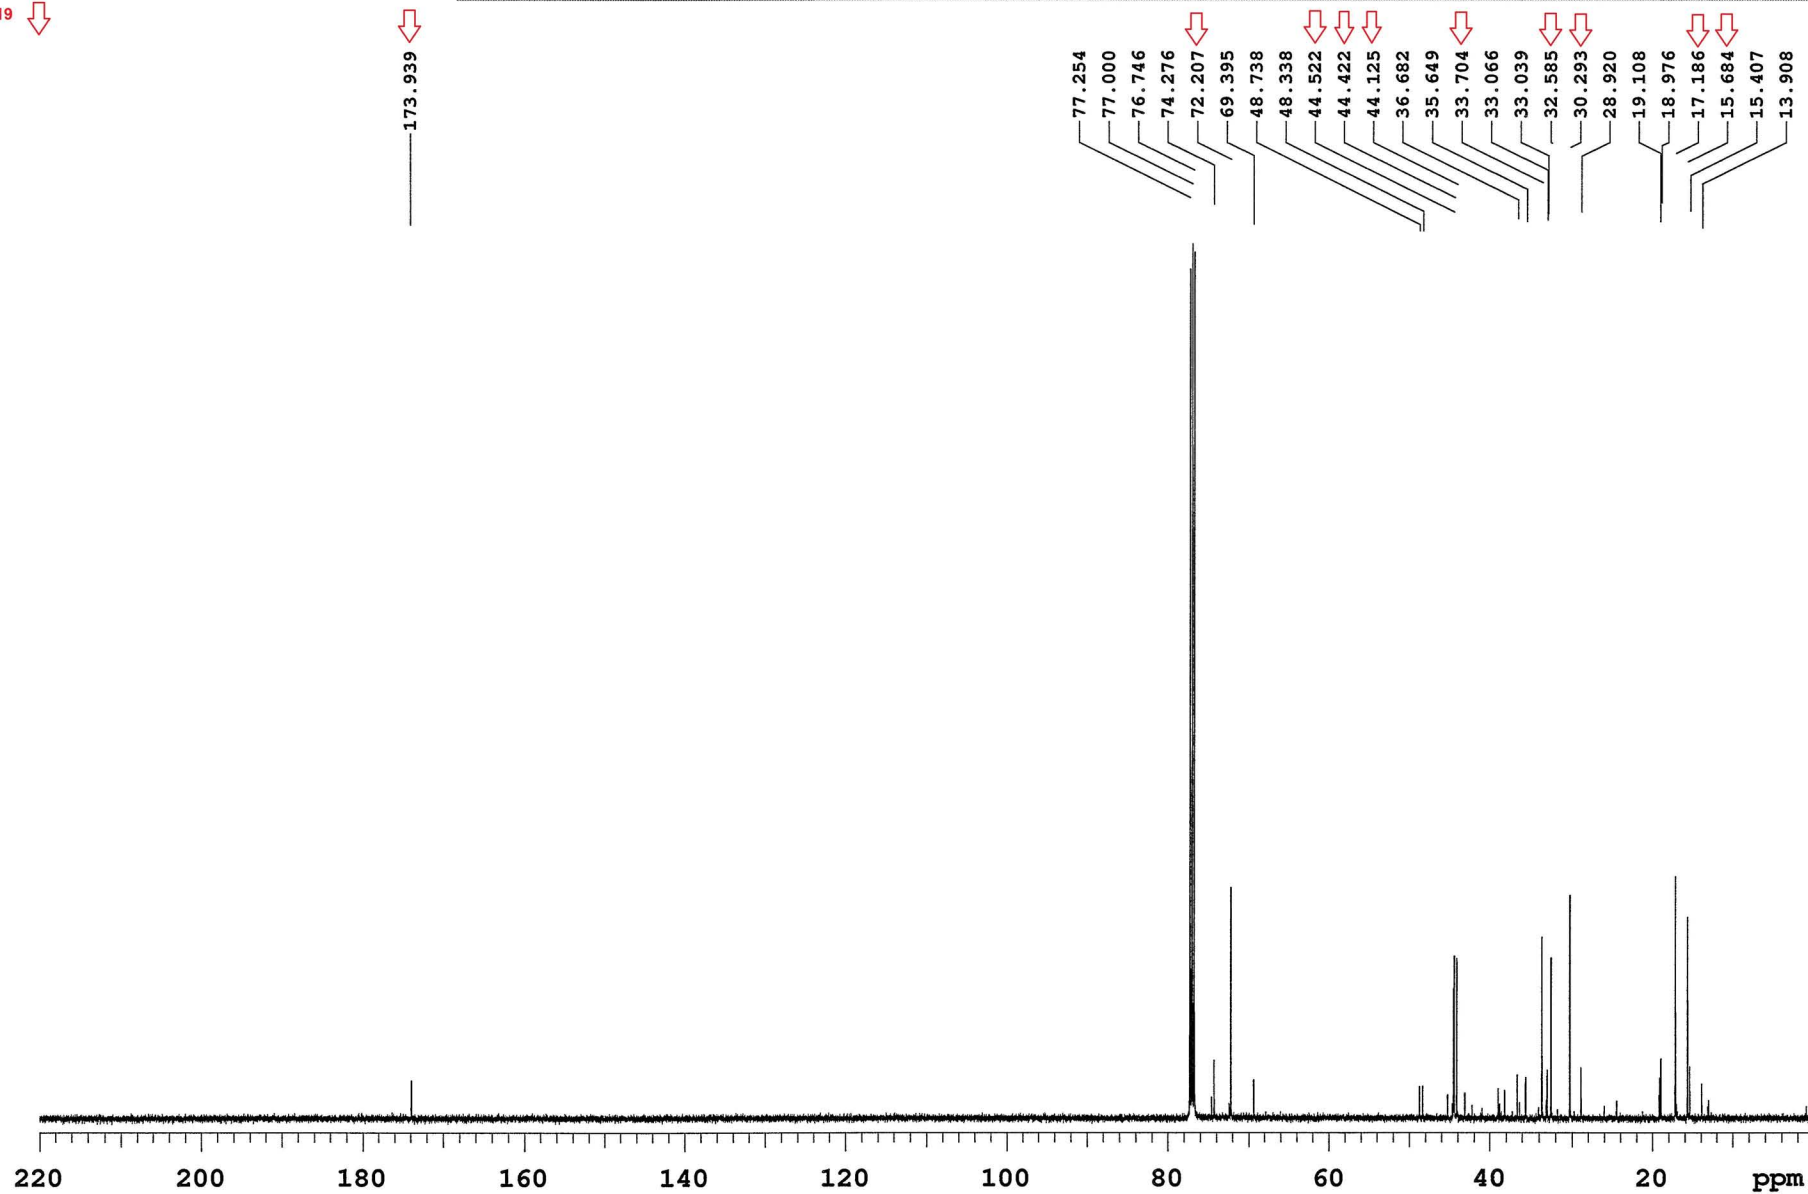13C NMR (125 MHz, CDCl<sub>3</sub>) of the mixture of **19** (major) and other isomers (minor), Scheme 3

### D-2000 Elite HPLC System Manager Report

Analyzed Date and Time: 02/01/2016 07:20 PM  
Reported Date and Time: 02/01/2016 08:41 PM

Processed Date and Time: 02/01/2016 08:40 PM

Data Path: D:\Prakash\DATA\0059\  
Processing Method: test-IPA/Hx

System (acquisition): Sys 1 Series: 0059  
Application(data): Prakash Chaudari Vial Number: 1  
Sample Name: PDC-02-412F1 (Chiral) Vial Type: UNK  
Injection from this vial: 1 of 1 Volume: 20.0 ul  
Sample Description: 1%IPA+HX 1mL/MIN COL-IA

Chrom Type: Fixed WL Chromatogram, 225 nm

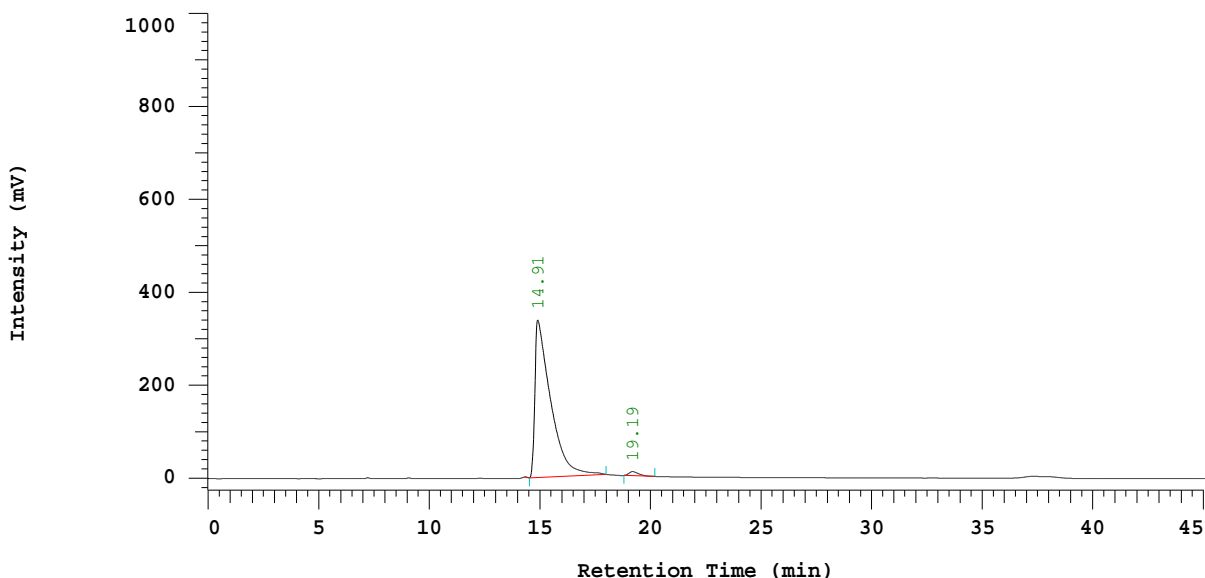

Processing Method: test-IPA/Hx

Column Type: IA

Method Developer: Prakash

Method Description:

Chrom Type: Fixed WL Chromatogram, 225 nm

Peak Quantitation: AREA

Calculation Method: EXT-STD

Scale Factor 1: 1.000

| No. | RT    | Area     | Height | Area %  |
|-----|-------|----------|--------|---------|
| 1   | 14.91 | 16613945 | 338847 | 98.418  |
| 2   | 19.19 | 267081   | 8932   | 1.582   |
|     |       | 16881026 | 347779 | 100.000 |

Peak rejection level: 200000

HPLC analysis of (-)-1, obtained from the metathesis reaction of (-)-citronellal.

### D-2000 Elite HPLC System Manager Report

Analyzed Date and Time: 02/19/2016 06:18 PM  
Reported Date and Time: 02/19/2016 07:15 PM

Processed Date and Time: 02/19/2016 07:12 PM

Data Path: D:\Prakash\DATA\0075\  
Processing Method: test-IPA/Hx

System (acquisition): Sys 1  
Application(data): Prakash Chaudari  
Sample Name: PDC-02-409-F2 (Racemic)  
Injection from this vial: 1 of 1  
Sample Description: 1%IPA+HX 1.00mL/MIN COL-IA

Series: 0075  
Vial Number: 1  
Vial Type: UNK  
Volume: 20.0 ul

Chrom Type: Fixed WL Chromatogram, 225 nm

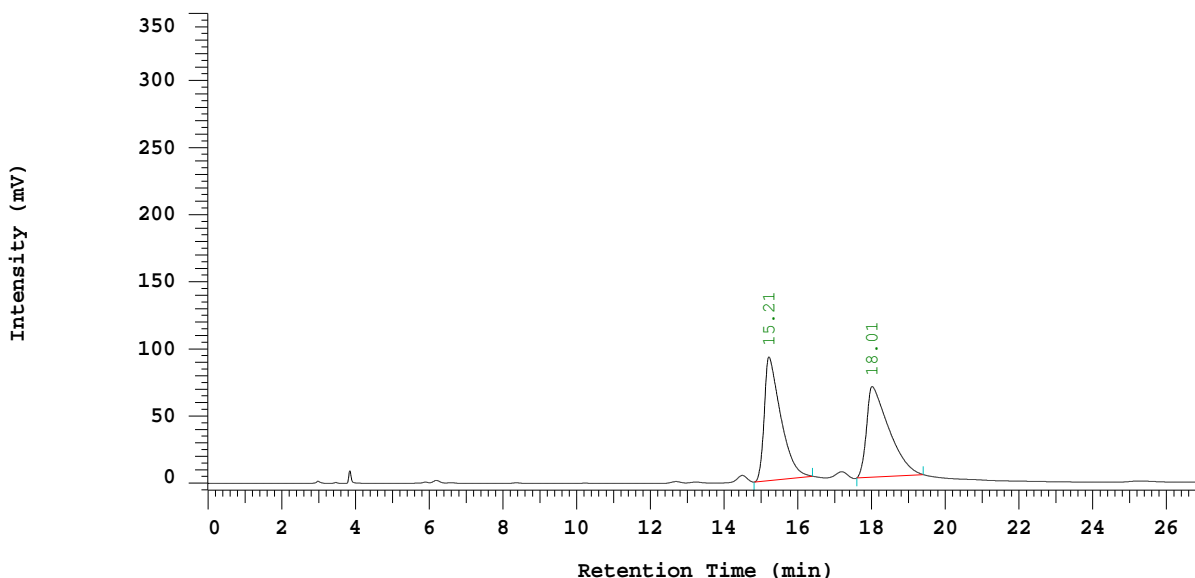

Processing Method: test-IPA/Hx

Column Type: IA

Method Developer: Prakash

Method Description:

Chrom Type: Fixed WL Chromatogram, 225 nm

Peak Quantitation: AREA

Calculation Method: EXT-STD

Scale Factor 1: 1.000

| No. | RT    | Area    | Height | Area %  |
|-----|-------|---------|--------|---------|
| 1   | 15.21 | 2852853 | 92120  | 50.198  |
| 2   | 18.01 | 2830365 | 67429  | 49.802  |
|     |       | 5683218 | 159549 | 100.000 |

Peak rejection level: 200

HPLC analysis of (±)-1, obtained from the metathesis reaction of (±)-citronellal  
For comparison.

### D-2000 Elite HPLC System Manager Report

Analyzed Date and Time: 02/20/2016 12:46 AM  
Reported Date and Time: 02/20/2016 03:22 PM

Processed Date and Time: 02/20/2016 03:18 PM

Data Path: D:\Prakash\DATA\0077\  
Processing Method: test-IPA/Hx

System (acquisition): Sys 1  
Application(data): Prakash Chaudari  
Sample Name: PDC-02-409 & 410 CO  
Injection from this vial: 1 of 1  
Sample Description: 1%IPA+HX 1.00mL/MIN COL-IA

Series: 0077  
Vial Number: 1  
Vial Type: UNK  
Volume: 20.0 ul

Chrom Type: Fixed WL Chromatogram, 225 nm

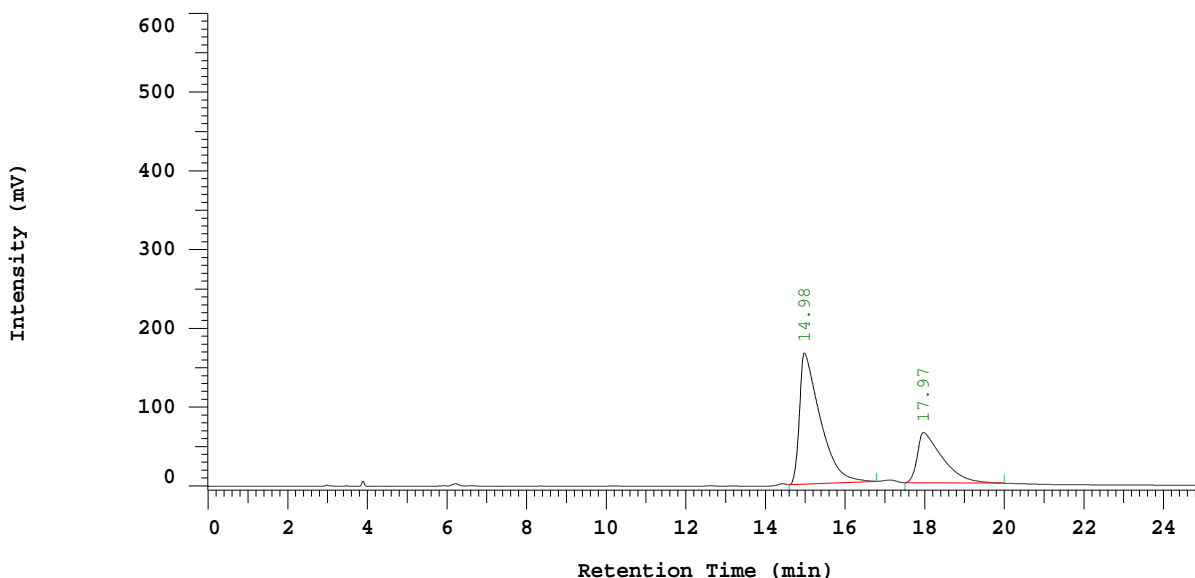

Processing Method: test-IPA/Hx

Column Type: IA

Method Developer: Prakash

Method Description:

Chrom Type: Fixed WL Chromatogram, 225 nm

Peak Quantitation: AREA

Calculation Method: EXT-STD

Scale Factor 1: 1.000

| No. | RT    | Area    | Height | Area %  |
|-----|-------|---------|--------|---------|
| 1   | 14.98 | 5994592 | 166447 | 68.276  |
| 2   | 17.97 | 2785342 | 63763  | 31.724  |
|     |       | 8779934 | 230210 | 100.000 |

Peak rejection level: 200

HPLC analysis with the co-injection of (-)-1 and (±)-1, for comparison.
